# Supplementary material for: Interplay of host microbiota, genetic perturbations, and inflammation promotes local development of intestinal neoplasms in mice
Source: PubMed Central journal article supplement — J Exp Med. 2014 Mar 10;211(3):457–72. doi: 10.1084/jem.20131587 (PMC3949565; doi:10.1084/jem.20131587), 2014-03-10
Supplement: supp_jem.20131587_JEM_20131587_sm.pdf [file supp_jem.20131587_JEM_20131587_sm.pdf]

## SUPPLEMENTAL MATERIAL

Bongers et al., <http://www.jem.org/cgi/content/full/jem.20131587/DC1>

Table S1, included as a separate PDF file, shows differentially regulated genes by RNA-Seq analysis in tissue isolated from *HBUS* polyps compared with unaffected proximal cecum, as show in the heat map.

Table S2, included as a separate PDF file, shows ClueGO analysis of the RNA-Seq analysis in tissue isolated from *HBUS* polyps compared with unaffected proximal cecum.

Table S3, included as a separate PDF file, shows a subsampled and filtered OTU table of Taconic moms, rederived *HBUS* mice, and *HBUS* and WT mice obtained through interbreeding with mice obtained from the Jackson Laboratory.

Table S4, included as a separate PDF file, shows statistical analysis of OTUs in Table S3.

Table S5, included as a separate PDF file, shows differentially regulated genes by BeadArray in CD45<sup>+</sup> cells isolated from *HBUS* polyps compared with unaffected proximal cecum, as show in the heat map.

Table S6, included as a separate PDF file, shows ClueGO analysis of the BeadArray analysis in CD45<sup>+</sup> cells isolated from *HBUS* polyps compared with unaffected proximal cecum.
