# Supplementary material for: Interplay of host microbiota, genetic perturbations, and inflammation promotes local development of intestinal neoplasms in mice
Source: PubMed Central journal article supplement — J Exp Med. 2014 Mar 10;211(3):457–72. doi: 10.1084/jem.20131587 (PMC3949565; doi:10.1084/jem.20131587), 2014-03-10
Supplement: supp_jem.20131587_JEM_20131587_TableS1.pdf [file supp_jem.20131587_JEM_20131587_TableS1.pdf]

**Table S1.** Differentially regulated genes by RNA-Seq analysis in tissue isolated from *HBUS* polyps compared with unaffected proximal cecum, as show in the heat map

| Genes              | logFC  | logCPM | LR      | P-value | FDR   | Associated gene name | MGI ID      | MGI symbol | MGI description                                                                 |
|--------------------|--------|--------|---------|---------|-------|----------------------|-------------|------------|---------------------------------------------------------------------------------|
| ENSMUSG00000000303 | 0.635  | 9.608  | 9.131   | 0.003   | 0.041 | Cdh1                 | MGI:88354   | Cdh1       | cadherin 1                                                                      |
| ENSMUSG00000000538 | -0.635 | 5.376  | 8.706   | 0.003   | 0.049 | Tom1l2               | MGI:2443306 | Tom1l2     | target of myb1-like 2 (chicken)                                                 |
| ENSMUSG00000000805 | -3.219 | 5.838  | 115.154 | 0.000   | 0.000 | Car4                 | MGI:1096574 | Car4       | carbonic anhydrase 4                                                            |
| ENSMUSG00000000938 | -1.838 | 3.136  | 21.098  | 0.000   | 0.000 | Hoxa10               | MGI:96171   | Hoxa10     | homeobox A10                                                                    |
| ENSMUSG00000000957 | 1.428  | 3.328  | 12.041  | 0.001   | 0.011 | Mmp14                | MGI:101900  | Mmp14      | matrix metalloproteinase 14 (membrane-inserted)                                 |
| ENSMUSG00000001025 | 1.092  | 7.162  | 18.812  | 0.000   | 0.001 | S100a6               | MGI:1339467 | S100a6     | S100 calcium binding protein A6 (calcyclin)                                     |
| ENSMUSG00000001095 | -1.533 | 5.176  | 25.507  | 0.000   | 0.000 | Slc13a2              | MGI:1276558 | Slc13a2    | solute carrier family 13 (sodium-dependent dicarboxylate transporter), member 2 |
| ENSMUSG00000001225 | -2.241 | 8.181  | 85.132  | 0.000   | 0.000 | Slc26a3              | MGI:107181  | Slc26a3    | solute carrier family 26, member 3                                              |
| ENSMUSG00000001313 | 2.593  | 3.818  | 15.414  | 0.000   | 0.003 | Rnd2                 | MGI:1338755 | Rnd2       | Rho family GTPase 2                                                             |
| ENSMUSG00000001349 | -3.237 | 2.230  | 17.426  | 0.000   | 0.001 | Cnn1                 | MGI:104979  | Cnn1       | calponin 1                                                                      |
| ENSMUSG00000001435 | 2.171  | 4.432  | 60.550  | 0.000   | 0.000 | Col18a1              | MGI:88451   | Col18a1    | collagen, type XVIII, alpha 1                                                   |
| ENSMUSG00000001506 | 2.312  | 5.576  | 84.733  | 0.000   | 0.000 | Col1a1               | MGI:88467   | Col1a1     | collagen, type I, alpha 1                                                       |
| ENSMUSG00000001507 | 0.682  | 6.470  | 10.377  | 0.001   | 0.024 | Itga3                | MGI:96602   | Itga3      | integrin alpha 3                                                                |
| ENSMUSG00000001627 | 0.945  | 5.928  | 16.138  | 0.000   | 0.002 | Ifrd1                | MGI:1316717 | Ifrd1      | interferon-related developmental regulator 1                                    |
| ENSMUSG00000001700 | -0.761 | 4.658  | 9.344   | 0.002   | 0.037 | Gramd3               | MGI:1914815 | Gramd3     | GRAM domain containing 3                                                        |
| ENSMUSG00000001943 | -1.611 | 3.149  | 15.783  | 0.000   | 0.002 | Vsig2                | MGI:1928009 | Vsig2      | V-set and immunoglobulin domain containing 2                                    |
| ENSMUSG00000002020 | 3.211  | 1.073  | 10.047  | 0.002   | 0.028 | Ltbp2                | MGI:99502   | Ltbp2      | latent transforming growth factor beta binding protein 2                        |
| ENSMUSG00000002365 | 0.711  | 5.559  | 9.807   | 0.002   | 0.031 | Snx9                 | MGI:1913866 | Snx9       | sorting nexin 9                                                                 |
| ENSMUSG00000002565 | -0.931 | 5.441  | 17.857  | 0.000   | 0.001 | Scin                 | MGI:1306794 | Scin       | scinderin                                                                       |
| ENSMUSG00000002602 | 1.337  | 3.469  | 11.747  | 0.001   | 0.013 | Axl                  | MGI:1347244 | Axl        | AXL receptor tyrosine kinase                                                    |
| ENSMUSG00000002741 | 0.648  | 5.617  | 9.622   | 0.002   | 0.034 | Ykt6                 | MGI:1927550 | Ykt6       | YKT6 homolog (S. Cerevisiae)                                                    |
| ENSMUSG00000002885 | 2.108  | 3.416  | 29.660  | 0.000   | 0.000 | Cd97                 | MGI:1347095 | Cd97       | CD97 antigen                                                                    |
| ENSMUSG00000002900 | 1.608  | 4.618  | 35.267  | 0.000   | 0.000 | Lamb1                | MGI:96743   | Lamb1      | laminin B1                                                                      |
| ENSMUSG00000002944 | -1.821 | 2.205  | 10.347  | 0.001   | 0.025 | Cd36                 | MGI:107899  | Cd36       | CD36 antigen                                                                    |
| ENSMUSG00000003032 | -0.942 | 7.754  | 20.054  | 0.000   | 0.000 | Klf4                 | MGI:1342287 | Klf4       | Kruppel-like factor 4 (gut)                                                     |
| ENSMUSG00000003541 | 1.452  | 2.676  | 9.187   | 0.002   | 0.040 | Ier3                 | MGI:104814  | Ier3       | immediate early response 3                                                      |
| ENSMUSG00000003545 | 2.249  | 2.361  | 15.495  | 0.000   | 0.002 | Fosb                 | MGI:95575   | Fosb       | FBJ osteosarcoma oncogene B                                                     |
| ENSMUSG00000004383 | -2.109 | 2.456  | 14.936  | 0.000   | 0.003 | Large                | MGI:1342270 | Large      | like-glycosyltransferase                                                        |
| ENSMUSG00000004568 | 0.750  | 4.716  | 9.769   | 0.002   | 0.031 | Arhgef18             | MGI:2142567 | Arhgef18   | rho/rac guanine nucleotide exchange factor (GEF) 18                             |
| ENSMUSG00000005364 | 2.863  | 2.422  | 22.937  | 0.000   | 0.000 | Il5ra                | MGI:96558   | Il5ra      | interleukin 5 receptor, alpha                                                   |
| ENSMUSG00000005397 | 1.858  | 4.673  | 50.768  | 0.000   | 0.000 | Nid1                 | MGI:97342   | Nid1       | nidogen 1                                                                       |
| ENSMUSG00000006403 | 2.996  | 1.587  | 12.260  | 0.000   | 0.011 | Adamts4              | MGI:1339949 | Adamts4    | a disintegrin-like and                                                          |

Table S1

| Genes              | logFC  | logCPM | LR     | P-value | FDR   | Associated gene name | MGI ID      | MGI symbol    | MGI description                                                        |
|--------------------|--------|--------|--------|---------|-------|----------------------|-------------|---------------|------------------------------------------------------------------------|
|                    |        |        |        |         |       |                      |             |               | metallopeptidase (reprolysin type) with thrombospondin type 1 motif, 4 |
| ENSMUSG00000006412 | 2.930  | 1.510  | 11.609 | 0.001   | 0.014 | Pfdn2                | MGI:1276111 | Pfdn2         | prefoldin 2                                                            |
| ENSMUSG00000006445 | 1.470  | 5.859  | 37.335 | 0.000   | 0.000 | Epha2                | MGI:95278   | Epha2         | Eph receptor A2                                                        |
| ENSMUSG00000006538 | -1.227 | 3.906  | 10.497 | 0.001   | 0.023 | Ihh                  | MGI:96533   | Ihh           | Indian hedgehog                                                        |
| ENSMUSG00000006642 | 1.569  | 3.346  | 13.951 | 0.000   | 0.005 | Tcf23                | MGI:1934960 | Tcf23         | transcription factor 23                                                |
| ENSMUSG00000007908 | 1.660  | 3.274  | 16.034 | 0.000   | 0.002 | Hmgcl1               | MGI:2446108 | Hmgcl1        | 3-hydroxymethyl-3-methylglutaryl-Coenzyme A lyase-like 1               |
| ENSMUSG00000008136 | 1.537  | 3.215  | 13.878 | 0.000   | 0.005 | Fhl2                 | MGI:1338762 | Fhl2          | four and a half LIM domains 2                                          |
| ENSMUSG00000008398 | 2.059  | 2.678  | 17.636 | 0.000   | 0.001 | Elk3                 | MGI:101762  | Elk3          | ELK3, member of ETS oncogene family                                    |
| ENSMUSG00000008892 | -0.776 | 5.673  | 13.811 | 0.000   | 0.005 | Vdac3                | MGI:106922  | Vdac3         | voltage-dependent anion channel 3                                      |
| ENSMUSG00000011034 | -1.118 | 3.933  | 12.422 | 0.000   | 0.010 | Slc5a1               | MGI:107678  | Slc5a1        | solute carrier family 5 (sodium/glucose cotransporter), member 1       |
| ENSMUSG00000011877 | 0.973  | 5.053  | 16.842 | 0.000   | 0.001 | Git1                 | MGI:1927140 | Git1          | G protein-coupled receptor kinase-interactor 1                         |
| ENSMUSG00000012428 | 1.231  | 3.402  | 9.583  | 0.002   | 0.034 | Steap4               | MGI:1923560 | Steap4        | STEAP family member 4                                                  |
| ENSMUSG00000013338 | 2.111  | 4.190  | 27.672 | 0.000   | 0.000 | Fer1l4               | MGI:1921812 | Fer1l4        | fer-1-like 4 (C. elegans)                                              |
| ENSMUSG00000013523 | -1.256 | 3.541  | 11.316 | 0.001   | 0.016 | Bcas1                | MGI:1924210 | Bcas1         | breast carcinoma amplified sequence 1                                  |
| ENSMUSG00000013653 | -1.057 | 8.827  | 21.245 | 0.000   | 0.000 | 1810065E05Rik        | MGI:1917114 | 1810065E05Rik | RIKEN cDNA 1810065E05 gene                                             |
| ENSMUSG00000013698 | 1.186  | 5.066  | 18.107 | 0.000   | 0.001 | Pea15a               | MGI:104799  | Pea15a        | phosphoprotein enriched in astrocytes 15A                              |
| ENSMUSG00000014329 | 2.630  | 1.612  | 10.139 | 0.001   | 0.027 | Bicc1                | MGI:1933388 | Bicc1         | bicaudal C homolog 1 (Drosophila)                                      |
| ENSMUSG00000014418 | -0.892 | 5.283  | 13.362 | 0.000   | 0.006 | Hps5                 | MGI:2180307 | Hps5          | Hermansky-Pudlak syndrome 5 homolog (human)                            |
| ENSMUSG00000014813 | 3.814  | 3.185  | 37.827 | 0.000   | 0.000 | Stc1                 | MGI:109131  | Stc1          | stanniocalcin 1                                                        |
| ENSMUSG00000015134 | 2.793  | 4.571  | 31.583 | 0.000   | 0.000 | Aldh1a3              | MGI:1861722 | Aldh1a3       | aldehyde dehydrogenase family 1, subfamily A3                          |
| ENSMUSG00000015143 | 1.528  | 5.696  | 49.138 | 0.000   | 0.000 | Actn1                | MGI:2137706 | Actn1         | actinin, alpha 1                                                       |
| ENSMUSG00000015405 | 3.499  | 1.204  | 9.567  | 0.002   | 0.034 | Ace2                 | MGI:1917258 | Ace2          | angiotensin I converting enzyme (peptidyl-dipeptidase A) 2             |
| ENSMUSG00000015468 | 2.799  | 1.344  | 11.624 | 0.001   | 0.014 | Notch4               | MGI:107471  | Notch4        | Notch gene homolog 4 (Drosophila)                                      |
| ENSMUSG00000015533 | 1.684  | 6.803  | 49.993 | 0.000   | 0.000 | Itga2                | MGI:96600   | Itga2         | integrin alpha 2                                                       |
| ENSMUSG00000015568 | -1.089 | 3.603  | 9.421  | 0.002   | 0.036 | Lpl                  | MGI:96820   | Lpl           | lipoprotein lipase                                                     |
| ENSMUSG00000015647 | 2.046  | 3.894  | 33.254 | 0.000   | 0.000 | Lama5                | MGI:105382  | Lama5         | laminin, alpha 5                                                       |
| ENSMUSG00000015787 | 1.731  | 2.109  | 9.413  | 0.002   | 0.036 | Abo                  | MGI:2135738 | Abo           | ABO blood group (transferase A, alpha 1-3-N-                           |

Table S1

| Genes              | logFC  | logCPM | LR     | P-value | FDR   | Associated gene name | MGI ID      | MGI symbol | MGI description                                                                                 |
|--------------------|--------|--------|--------|---------|-------|----------------------|-------------|------------|-------------------------------------------------------------------------------------------------|
| ENSMUSG00000015850 | 1.603  | 2.792  | 12.975 | 0.000   | 0.008 | Adamtsl4             | MGI:2389008 | Adamtsl4   | acetylgalactosaminyltransferase, transferase B, alpha 1-3-galactosyltransferase)                |
| ENSMUSG00000015869 | -0.749 | 5.440  | 10.354 | 0.001   | 0.024 | Prpsap1              | MGI:1915013 | Prpsap1    | ADAMTS-like 4                                                                                   |
| ENSMUSG00000015970 | 0.731  | 4.937  | 9.924  | 0.002   | 0.029 | Chdh                 | MGI:1860776 | Chdh       | phosphoribosyl pyrophosphate synthetase-associated protein 1                                    |
| ENSMUSG00000016487 | 0.949  | 4.480  | 12.513 | 0.000   | 0.009 | Ppfibp1              | MGI:1914783 | Ppfibp1    | choline dehydrogenase                                                                           |
| ENSMUSG00000016763 | 2.219  | 1.967  | 12.609 | 0.000   | 0.009 | Scube1               | MGI:1890616 | Scube1     | PTPRF interacting protein, binding protein 1 (liprin beta 1)                                    |
| ENSMUSG00000016933 | 1.105  | 3.748  | 10.244 | 0.001   | 0.026 | Plcg1                | MGI:97615   | Plcg1      | signal peptide, CUB domain, EGF-like 1                                                          |
| ENSMUSG00000016946 | 0.811  | 5.851  | 13.078 | 0.000   | 0.007 | Kctd5                | MGI:1916509 | Kctd5      | phospholipase C, gamma 1                                                                        |
| ENSMUSG00000017493 | 1.433  | 4.415  | 18.572 | 0.000   | 0.001 | Igfbp4               | MGI:96439   | Igfbp4     | potassium channel tetramerisation domain containing 5                                           |
| ENSMUSG00000017607 | -0.844 | 6.101  | 16.568 | 0.000   | 0.002 | Tns4                 | MGI:2144377 | Tns4       | insulin-like growth factor binding protein 4                                                    |
| ENSMUSG00000017737 | 1.885  | 3.771  | 21.077 | 0.000   | 0.000 | Mmp9                 | MGI:97011   | Mmp9       | protein 4                                                                                       |
| ENSMUSG00000017774 | 1.312  | 6.094  | 34.907 | 0.000   | 0.000 | Myo1c                | MGI:106612  | Myo1c      | tensin 4                                                                                        |
| ENSMUSG00000017868 | -1.702 | 4.113  | 29.877 | 0.000   | 0.000 | Sgk2                 | MGI:1351318 | Sgk2       | matrix metalloproteinase 9                                                                      |
| ENSMUSG00000018401 | -0.818 | 4.796  | 12.008 | 0.001   | 0.012 | Mttr4                | MGI:2180699 | Mttr4      | myosin IC                                                                                       |
| ENSMUSG00000018593 | 1.917  | 5.095  | 63.411 | 0.000   | 0.000 | Sparc                | MGI:98373   | Sparc      | serum/glucocorticoid regulated kinase 2                                                         |
| ENSMUSG00000018659 | -1.204 | 4.385  | 16.906 | 0.000   | 0.001 | Pnpo                 | MGI:2144151 | Pnpo       | myotubularin related protein 4                                                                  |
| ENSMUSG00000018830 | -2.714 | 5.634  | 33.597 | 0.000   | 0.000 | Myh11                | MGI:102643  | Myh11      | secreted acidic cysteine rich glycoprotein                                                      |
| ENSMUSG00000018849 | 1.049  | 5.461  | 24.315 | 0.000   | 0.000 | Wwc1                 | MGI:2388637 | Wwc1       | pyridoxine 5'-phosphate oxidase                                                                 |
| ENSMUSG00000018906 | 2.840  | 1.298  | 11.147 | 0.001   | 0.017 | P4ha2                | MGI:894286  | P4ha2      | myosin, heavy polypeptide 11, smooth muscle                                                     |
| ENSMUSG00000018919 | 2.636  | 2.225  | 19.130 | 0.000   | 0.000 | Tm4sf5               | MGI:1922854 | Tm4sf5     | WW, C2 and coiled-coil domain containing 1                                                      |
| ENSMUSG00000018920 | 1.259  | 4.214  | 18.620 | 0.000   | 0.001 | Cxcl16               | MGI:1932682 | Cxcl16     | procollagen-proline, 2-oxoglutarate 4-dioxygenase (proline 4-hydroxylase), alpha II polypeptide |
| ENSMUSG00000019302 | 0.906  | 6.104  | 19.238 | 0.000   | 0.000 | Atp6v0a1             | MGI:103286  | Atp6v0a1   | transmembrane 4 superfamily member 5                                                            |
| ENSMUSG00000019359 | -2.357 | 1.969  | 12.835 | 0.000   | 0.008 | Gdpd2                | MGI:1918834 | Gdpd2      | chemokine (C-X-C motif) ligand 16                                                               |
| ENSMUSG00000019577 | -2.039 | 4.061  | 32.029 | 0.000   | 0.000 | Pdk4                 | MGI:1351481 | Pdk4       | ATPase, H+ transporting, lysosomal V0 subunit A1                                                |
|                    |        |        |        |         |       |                      |             |            | glycerophosphodiester phosphodiesterase domain containing 2                                     |
|                    |        |        |        |         |       |                      |             |            | pyruvate dehydrogenase kinase,                                                                  |

Table S1

| Genes              | logFC  | logCPM | LR     | P-value | FDR   | Associated gene name | MGI ID      | MGI symbol | MGI description                                                                                |
|--------------------|--------|--------|--------|---------|-------|----------------------|-------------|------------|------------------------------------------------------------------------------------------------|
| ENSMUSG00000019647 | -1.137 | 5.574  | 29.302 | 0.000   | 0.000 | Sema6a               | MGI:1203727 | Sema6a     | isoenzyme 4<br>sema domain, transmembrane domain (TM), and cytoplasmic domain, (semaphorin) 6A |
| ENSMUSG00000019659 | 1.321  | 2.958  | 9.393  | 0.002   | 0.037 | Ccdc12               | MGI:1919904 | Ccdc12     | coiled-coil domain containing 12                                                               |
| ENSMUSG00000019890 | -1.643 | 3.598  | 16.058 | 0.000   | 0.002 | Nts                  | MGI:1328351 | Nts        | neurotensin                                                                                    |
| ENSMUSG00000019929 | 1.128  | 4.061  | 11.938 | 0.001   | 0.012 | Dcn                  | MGI:94872   | Dcn        | decorin                                                                                        |
| ENSMUSG00000019960 | 0.637  | 5.782  | 9.271  | 0.002   | 0.038 | Dusp6                | MGI:1914853 | Dusp6      | dual specificity phosphatase 6                                                                 |
| ENSMUSG00000019970 | -0.982 | 5.446  | 20.324 | 0.000   | 0.000 | Sgk1                 | MGI:1340062 | Sgk1       | serum/glucocorticoid regulated kinase 1                                                        |
| ENSMUSG00000019987 | 3.115  | 4.369  | 63.983 | 0.000   | 0.000 | Arg1                 | MGI:88070   | Arg1       | arginase, liver                                                                                |
| ENSMUSG00000020053 | 1.418  | 3.072  | 11.159 | 0.001   | 0.017 | Igf1                 | MGI:96432   | Igf1       | insulin-like growth factor 1                                                                   |
| ENSMUSG00000020108 | 0.856  | 4.634  | 9.598  | 0.002   | 0.034 | Ddit4                | MGI:1921997 | Ddit4      | DNA-damage-inducible transcript 4                                                              |
| ENSMUSG00000020122 | 1.188  | 7.187  | 28.833 | 0.000   | 0.000 | Egfr                 | MGI:95294   | Egfr       | epidermal growth factor receptor                                                               |
| ENSMUSG00000020154 | 1.520  | 2.986  | 13.798 | 0.000   | 0.005 | Ptprb                | MGI:97809   | Ptprb      | protein tyrosine phosphatase, receptor type, B                                                 |
| ENSMUSG00000020205 | 2.039  | 5.590  | 59.400 | 0.000   | 0.000 | Phlda1               | MGI:1096880 | Phlda1     | pleckstrin homology-like domain, family A, member 1                                            |
| ENSMUSG00000020241 | 1.373  | 3.727  | 12.864 | 0.000   | 0.008 | Col6a2               | MGI:88460   | Col6a2     | collagen, type VI, alpha 2                                                                     |
| ENSMUSG00000020250 | 1.240  | 7.618  | 32.951 | 0.000   | 0.000 | Txnrd1               | MGI:1354175 | Txnrd1     | thioredoxin reductase 1                                                                        |
| ENSMUSG00000020272 | -0.958 | 5.162  | 10.861 | 0.001   | 0.020 | Stk10                | MGI:1099439 | Stk10      | serine/threonine kinase 10                                                                     |
| ENSMUSG00000020427 | 1.929  | 2.728  | 17.942 | 0.000   | 0.001 | Igfbp3               | MGI:96438   | Igfbp3     | insulin-like growth factor binding protein 3                                                   |
| ENSMUSG00000020458 | 0.862  | 7.408  | 16.527 | 0.000   | 0.002 | Rtn4                 | MGI:1915835 | Rtn4       | reticulon 4                                                                                    |
| ENSMUSG00000020469 | 3.837  | 1.135  | 13.625 | 0.000   | 0.006 | Myl7                 | MGI:107495  | Myl7       | myosin, light polypeptide 7, regulatory                                                        |
| ENSMUSG00000020520 | 0.728  | 4.813  | 9.491  | 0.002   | 0.035 | Galnt10              | MGI:1890480 | Galnt10    | UDP-N-acetyl-alpha-D-galactosamine:polypeptide N-acetylgalactosaminyltransferase 10            |
| ENSMUSG00000020527 | -0.893 | 5.062  | 15.505 | 0.000   | 0.002 | Myo19                | MGI:1913446 | Myo19      | myosin XIX                                                                                     |
| ENSMUSG00000020589 | -2.091 | 2.545  | 19.360 | 0.000   | 0.000 | Fam49a               | MGI:1261783 | Fam49a     | family with sequence similarity 49, member A                                                   |
| ENSMUSG00000020634 | 0.704  | 6.096  | 10.369 | 0.001   | 0.024 | Ubxn2a               | MGI:2442310 | Ubxn2a     | UBX domain protein 2A                                                                          |
| ENSMUSG00000020674 | 1.932  | 3.347  | 25.387 | 0.000   | 0.000 | Pxdn                 | MGI:1916925 | Pxdn       | peroxidasin homolog (Drosophila)                                                               |
| ENSMUSG00000020689 | 1.509  | 2.729  | 11.843 | 0.001   | 0.012 | Itgb3                | MGI:96612   | Itgb3      | integrin beta 3                                                                                |
| ENSMUSG00000020718 | -2.615 | 1.603  | 9.133  | 0.003   | 0.041 | Polg2                | MGI:1354947 | Polg2      | polymerase (DNA directed), gamma 2, accessory subunit                                          |
| ENSMUSG00000020758 | 0.864  | 7.360  | 14.871 | 0.000   | 0.003 | Itgb4                | MGI:96613   | Itgb4      | integrin beta 4                                                                                |
| ENSMUSG00000020826 | 2.606  | 3.550  | 8.944  | 0.003   | 0.044 | Nos2                 | MGI:97361   | Nos2       | nitric oxide synthase 2, inducible                                                             |
| ENSMUSG00000020911 | 0.726  | 9.707  | 12.268 | 0.000   | 0.011 | Krt19                | MGI:96693   | Krt19      | keratin 19                                                                                     |
| ENSMUSG00000021097 | -0.660 | 7.569  | 9.932  | 0.002   | 0.029 | Clmn                 | MGI:2136957 | Clmn       | calmin                                                                                         |

Table S1

| Genes              | logFC  | logCPM | LR     | P-value | FDR   | Associated gene name | MGI ID      | MGI symbol | MGI description                                           |
|--------------------|--------|--------|--------|---------|-------|----------------------|-------------|------------|-----------------------------------------------------------|
| ENSMUSG00000021109 | 0.881  | 8.116  | 12.944 | 0.000   | 0.008 | Hif1a                | MGI:106918  | Hif1a      | hypoxia inducible factor 1, alpha subunit                 |
| ENSMUSG00000021118 | 0.994  | 6.005  | 21.726 | 0.000   | 0.000 | Plek2                | MGI:1351466 | Plek2      | pleckstrin 2                                              |
| ENSMUSG00000021136 | 3.172  | 1.446  | 13.468 | 0.000   | 0.006 | Smoc1                | MGI:1929878 | Smoc1      | SPARC related modular calcium binding 1                   |
| ENSMUSG00000021187 | 1.099  | 6.057  | 27.424 | 0.000   | 0.000 | Tc2n                 | MGI:1921663 | Tc2n       | tandem C2 domains, nuclear                                |
| ENSMUSG00000021193 | 1.110  | 3.691  | 10.644 | 0.001   | 0.021 | Pitrm1               | MGI:1916867 | Pitrm1     | pitrilysin metallepetidase 1                              |
| ENSMUSG00000021250 | 0.943  | 6.481  | 20.490 | 0.000   | 0.000 | Fos                  | MGI:95574   | Fos        | FBJ osteosarcoma oncogene                                 |
| ENSMUSG00000021268 | 2.800  | 2.323  | 13.214 | 0.000   | 0.007 | Meg3                 | MGI:1202886 | Meg3       | maternally expressed 3                                    |
| ENSMUSG00000021281 | 3.188  | 0.952  | 10.015 | 0.002   | 0.028 | Tnfaip2              | MGI:104960  | Tnfaip2    | tumor necrosis factor, alpha-induced protein 2            |
| ENSMUSG00000021306 | 2.389  | 3.776  | 31.745 | 0.000   | 0.000 | Gpr137b              | MGI:1891463 | Gpr137b    | G protein-coupled receptor 137B                           |
| ENSMUSG00000021338 | 0.890  | 5.361  | 17.165 | 0.000   | 0.001 | Lrrc16a              | MGI:1915982 | Lrrc16a    | leucine rich repeat containing 16A                        |
| ENSMUSG00000021360 | 0.903  | 4.831  | 10.280 | 0.001   | 0.025 | Gcnt2                | MGI:1100870 | Gcnt2      | glucosaminyl (N-acetyl) transferase 2, I-branching enzyme |
| ENSMUSG00000021493 | 2.135  | 3.032  | 19.859 | 0.000   | 0.000 | Pdlim7               | MGI:1914649 | Pdlim7     | PDZ and LIM domain 7                                      |
| ENSMUSG00000021508 | 3.046  | 3.527  | 49.486 | 0.000   | 0.000 | Cxcl14               | MGI:1888514 | Cxcl14     | chemokine (C-X-C motif) ligand 14                         |
| ENSMUSG00000021614 | 1.731  | 2.494  | 11.929 | 0.001   | 0.012 | Vcan                 | MGI:102889  | Vcan       | versican                                                  |
| ENSMUSG00000021676 | -0.698 | 7.885  | 11.516 | 0.001   | 0.014 | Iqgap2               | MGI:2449975 | Iqgap2     | IQ motif containing GTPase activating protein 2           |
| ENSMUSG00000021765 | 3.259  | 1.436  | 12.334 | 0.000   | 0.010 | Fst                  | MGI:95586   | Fst        | follistatin                                               |
| ENSMUSG00000021806 | 1.994  | 2.598  | 17.700 | 0.000   | 0.001 | Nid2                 | MGI:1298229 | Nid2       | nidogen 2                                                 |
| ENSMUSG00000021822 | 1.819  | 3.704  | 24.635 | 0.000   | 0.000 | Plau                 | MGI:97611   | Plau       | plasminogen activator, urokinase                          |
| ENSMUSG00000021831 | 1.276  | 6.357  | 36.016 | 0.000   | 0.000 | Ero1l                | MGI:1354385 | Ero1l      | ERO1-like (S. cerevisiae)                                 |
| ENSMUSG00000021950 | 2.647  | 5.611  | 53.548 | 0.000   | 0.000 | Anxa8                | MGI:1201374 | Anxa8      | annexin A8                                                |
| ENSMUSG00000021994 | 1.781  | 4.024  | 24.541 | 0.000   | 0.000 | Wnt5a                | MGI:98958   | Wnt5a      | wingless-related MMTV integration site 5A                 |
| ENSMUSG00000021996 | 0.735  | 6.195  | 9.617  | 0.002   | 0.034 | Esd                  | MGI:95421   | Esd        | esterase D/formylglutathione hydrolase                    |
| ENSMUSG00000022019 | -1.534 | 3.236  | 9.247  | 0.002   | 0.039 | Tdrd3                | MGI:2444023 | Tdrd3      | tudor domain containing 3                                 |
| ENSMUSG00000022037 | 2.389  | 4.966  | 52.702 | 0.000   | 0.000 | Clu                  | MGI:88423   | Clu        | clusterin                                                 |
| ENSMUSG00000022057 | 1.119  | 5.268  | 22.157 | 0.000   | 0.000 | Adamdec1             | MGI:1917650 | Adamdec1   | ADAM-like, decysin 1                                      |
| ENSMUSG00000022221 | 0.823  | 4.537  | 9.501  | 0.002   | 0.035 | Ripk3                | MGI:2154952 | Ripk3      | receptor-interacting serine-threonine kinase 3            |
| ENSMUSG00000022358 | -1.005 | 5.705  | 22.278 | 0.000   | 0.000 | Fbxo32               | MGI:1914981 | Fbxo32     | F-box protein 32                                          |
| ENSMUSG00000022419 | -0.662 | 5.713  | 10.435 | 0.001   | 0.024 | Deptor               | MGI:2146322 | Deptor     | DEP domain containing MTOR-interacting protein            |
| ENSMUSG00000022479 | -0.875 | 6.447  | 16.883 | 0.000   | 0.001 | Vdr                  | MGI:103076  | Vdr        | vitamin D receptor                                        |
| ENSMUSG00000022546 | -1.609 | 3.748  | 20.129 | 0.000   | 0.000 | Gpt                  | MGI:95802   | Gpt        | glutamic pyruvic transaminase, soluble                    |

Table S1

| Genes              | logFC  | logCPM | LR     | P-value | FDR   | Associated gene name | MGI ID      | MGI symbol | MGI description                                        |
|--------------------|--------|--------|--------|---------|-------|----------------------|-------------|------------|--------------------------------------------------------|
| ENSMUSG00000022582 | 2.664  | 3.999  | 22.315 | 0.000   | 0.000 | Ly6g                 | MGI:109440  | Ly6g       | lymphocyte antigen 6 complex, locus G                  |
| ENSMUSG00000022636 | 1.798  | 4.600  | 36.258 | 0.000   | 0.000 | Alcam                | MGI:1313266 | Alcam      | activated leukocyte cell adhesion molecule             |
| ENSMUSG00000022747 | 1.571  | 3.423  | 17.382 | 0.000   | 0.001 | St3gal6              | MGI:1888707 | St3gal6    | ST3 beta-galactoside alpha-2,3-sialyltransferase 6     |
| ENSMUSG00000022797 | -0.756 | 7.119  | 12.996 | 0.000   | 0.008 | Tfrc                 | MGI:98822   | Tfrc       | transferrin receptor                                   |
| ENSMUSG00000022816 | 2.235  | 3.644  | 25.524 | 0.000   | 0.000 | Fstl1                | MGI:102793  | Fstl1      | follicle-stimulating-like 1                            |
| ENSMUSG00000022952 | 0.942  | 5.690  | 20.443 | 0.000   | 0.000 | Runx1                | MGI:99852   | Runx1      | runt related transcription factor 1                    |
| ENSMUSG00000022974 | -0.936 | 4.154  | 8.770  | 0.003   | 0.048 | Gcfc1                | MGI:1914617 | Gcfc1      | GC-rich sequence DNA-binding factor 1                  |
| ENSMUSG00000023039 | 1.897  | 6.486  | 54.525 | 0.000   | 0.000 | Krt7                 | MGI:96704   | Krt7       | keratin 7                                              |
| ENSMUSG00000023043 | 1.563  | 7.721  | 47.479 | 0.000   | 0.000 | Krt18                | MGI:96692   | Krt18      | keratin 18                                             |
| ENSMUSG00000023057 | -1.214 | 7.741  | 24.829 | 0.000   | 0.000 | Fabp2                | MGI:95478   | Fabp2      | fatty acid binding protein 2, intestinal               |
| ENSMUSG00000023132 | -4.522 | 0.413  | 9.680  | 0.002   | 0.033 | Gzma                 | MGI:109266  | Gzma       | granzyme A                                             |
| ENSMUSG00000023186 | -0.781 | 5.795  | 13.652 | 0.000   | 0.006 | Vwa5a                | MGI:1915026 | Vwa5a      | von Willebrand factor A domain containing 5A           |
| ENSMUSG00000023247 | -0.920 | 7.861  | 13.615 | 0.000   | 0.006 | Guca2a               | MGI:102738  | Guca2a     | guanylate cyclase activator 2a (guanylin)              |
| ENSMUSG00000023905 | 1.832  | 3.357  | 22.845 | 0.000   | 0.000 | Tnfrsf12a            | MGI:1351484 | Tnfrsf12a  | tumor necrosis factor receptor superfamily, member 12a |
| ENSMUSG00000023914 | -1.154 | 6.684  | 26.709 | 0.000   | 0.000 | Mep1a                | MGI:96963   | Mep1a      | mephrin 1 alpha                                        |
| ENSMUSG00000023959 | -1.158 | 6.016  | 29.503 | 0.000   | 0.000 | Clic5                | MGI:1917912 | Clic5      | chloride intracellular channel 5                       |
| ENSMUSG00000024044 | -0.753 | 5.011  | 10.230 | 0.001   | 0.026 | Epb4.1l3             | MGI:103008  | Epb4.1l3   | erythrocyte protein band 4.1-like 3                    |
| ENSMUSG00000024048 | 0.847  | 5.975  | 15.518 | 0.000   | 0.002 | Myl12a               | MGI:1914518 | Myl12a     | myosin, light chain 12A, regulatory, non-sarcomeric    |
| ENSMUSG00000024124 | -0.759 | 5.988  | 10.085 | 0.001   | 0.027 | Prss30               | MGI:1353645 | Prss30     | protease, serine, 30                                   |
| ENSMUSG00000024143 | 1.597  | 2.587  | 11.757 | 0.001   | 0.013 | Rhoq                 | MGI:1931553 | Rhoq       | ras homolog gene family, member Q                      |
| ENSMUSG00000024164 | -2.613 | 4.801  | 38.586 | 0.000   | 0.000 | C3                   | MGI:88227   | C3         | complement component 3                                 |
| ENSMUSG00000024190 | 1.361  | 4.520  | 26.857 | 0.000   | 0.000 | Dusp1                | MGI:105120  | Dusp1      | dual specificity phosphatase 1                         |
| ENSMUSG00000024298 | -0.774 | 4.605  | 9.469  | 0.002   | 0.035 | Zfp871               | MGI:1921793 | Zfp871     | zinc finger protein 871                                |
| ENSMUSG00000024340 | -1.377 | 3.084  | 8.879  | 0.003   | 0.046 | Btnl2                | MGI:1859549 | Btnl2      | butyrophilin-like 2                                    |
| ENSMUSG00000024421 | 1.314  | 8.399  | 27.948 | 0.000   | 0.000 | Lama3                | MGI:99909   | Lama3      | laminin, alpha 3                                       |
| ENSMUSG00000024521 | 1.088  | 4.787  | 20.984 | 0.000   | 0.000 | Pmaip1               | MGI:1930146 | Pmaip1     | phorbol-12-myristate-13-acetate-induced protein 1      |
| ENSMUSG00000024529 | 2.881  | 2.460  | 22.889 | 0.000   | 0.000 | Lox                  | MGI:96817   | Lox        | lysyl oxidase                                          |
| ENSMUSG00000024538 | 3.270  | 1.501  | 17.175 | 0.000   | 0.001 | Ppic                 | MGI:97751   | Ppic       | peptidylprolyl isomerase C                             |
| ENSMUSG00000024544 | 2.128  | 2.007  | 12.326 | 0.000   | 0.010 | D18Ert653e           | MGI:1277150 | D18Ert653e | DNA segment, Chr 18, ERATO Doi 653, expressed          |
| ENSMUSG00000024556 | -1.045 | 5.470  | 20.410 | 0.000   | 0.000 | Me2                  | MGI:2147351 | Me2        | malic enzyme 2, NAD(+)-dependent, mitochondrial        |

Table S1

| Genes              | logFC  | logCPM | LR     | P-value | FDR   | Associated gene name | MGI ID      | MGI symbol | MGI description                                                                                       |
|--------------------|--------|--------|--------|---------|-------|----------------------|-------------|------------|-------------------------------------------------------------------------------------------------------|
| ENSMUSG00000024589 | -0.977 | 5.555  | 15.387 | 0.000   | 0.003 | Nedd4l               | MGI:1933754 | Nedd4l     | neural precursor cell expressed, developmentally down-regulated gene 4-like                           |
| ENSMUSG00000024598 | 2.679  | 1.613  | 12.818 | 0.000   | 0.008 | Fbn2                 | MGI:95490   | Fbn2       | fibrillin 2                                                                                           |
| ENSMUSG00000024610 | -1.432 | 6.235  | 13.308 | 0.000   | 0.007 | Cd74                 | MGI:96534   | Cd74       | CD74 antigen (invariant polypeptide of major histocompatibility complex, class II antigen-associated) |
| ENSMUSG00000024620 | 1.344  | 3.092  | 11.172 | 0.001   | 0.017 | Pdgfrb               | MGI:97531   | Pdgfrb     | platelet derived growth factor receptor, beta polypeptide                                             |
| ENSMUSG00000024642 | 0.945  | 4.706  | 15.253 | 0.000   | 0.003 | Tle4                 | MGI:104633  | Tle4       | transducin-like enhancer of split 4, homolog of Drosophila E(spl)                                     |
| ENSMUSG00000024659 | 2.368  | 8.377  | 59.137 | 0.000   | 0.000 | Anxa1                | MGI:96819   | Anxa1      | annexin A1                                                                                            |
| ENSMUSG00000024727 | -1.903 | 4.755  | 55.153 | 0.000   | 0.000 | Trpm6                | MGI:2675603 | Trpm6      | transient receptor potential cation channel, subfamily M, member 6                                    |
| ENSMUSG00000024854 | 1.659  | 3.460  | 20.074 | 0.000   | 0.000 | Pold4                | MGI:1916995 | Pold4      | polymerase (DNA-directed), delta 4                                                                    |
| ENSMUSG00000024899 | -0.911 | 8.110  | 19.268 | 0.000   | 0.000 | Papss2               | MGI:1330223 | Papss2     | 3'-phosphoadenosine 5'-phosphosulfate synthase 2                                                      |
| ENSMUSG00000024900 | -0.735 | 6.703  | 12.138 | 0.000   | 0.011 | Cpt1a                | MGI:1098296 | Cpt1a      | carnitine palmitoyltransferase 1a, liver                                                              |
| ENSMUSG00000024913 | 0.989  | 4.832  | 17.388 | 0.000   | 0.001 | Lrp5                 | MGI:1278315 | Lrp5       | low density lipoprotein receptor-related protein 5                                                    |
| ENSMUSG00000024937 | 0.770  | 5.526  | 11.469 | 0.001   | 0.015 | Ehbp111              | MGI:3612340 | Ehbp111    | EH domain binding protein 1-like 1                                                                    |
| ENSMUSG00000024952 | 0.988  | 4.109  | 10.622 | 0.001   | 0.022 | Rps6ka4              | MGI:1930076 | Rps6ka4    | ribosomal protein S6 kinase, polypeptide 4                                                            |
| ENSMUSG00000025002 | -1.811 | 10.242 | 52.529 | 0.000   | 0.000 | Cyp2c55              | MGI:1919332 | Cyp2c55    | cytochrome P450, family 2, subfamily c, polypeptide 55                                                |
| ENSMUSG00000025037 | -0.750 | 8.473  | 11.857 | 0.001   | 0.012 | Maoa                 | MGI:96915   | Maoa       | monoamine oxidase A                                                                                   |
| ENSMUSG00000025092 | -1.558 | 2.448  | 10.400 | 0.001   | 0.024 | Hspa12a              | MGI:1920692 | Hspa12a    | heat shock protein 12A                                                                                |
| ENSMUSG00000025161 | 1.418  | 5.570  | 41.402 | 0.000   | 0.000 | Slc16a3              | MGI:1933438 | Slc16a3    | solute carrier family 16 (monocarboxylic acid transporters), member 3                                 |
| ENSMUSG00000025277 | -1.238 | 3.859  | 13.829 | 0.000   | 0.005 | Abhd6                | MGI:1913332 | Abhd6      | abhydrolase domain containing 6                                                                       |
| ENSMUSG00000025278 | 1.260  | 10.112 | 34.896 | 0.000   | 0.000 | Flnb                 | MGI:2446089 | Flnb       | filamin, beta                                                                                         |
| ENSMUSG00000025283 | 0.627  | 6.672  | 9.282  | 0.002   | 0.038 | Sat1                 | MGI:98233   | Sat1       | spermidine/spermine N1-acetyl transferase 1                                                           |
| ENSMUSG00000025287 | 0.910  | 4.682  | 12.422 | 0.000   | 0.010 | Acot9                | MGI:1928939 | Acot9      | acyl-CoA thioesterase 9                                                                               |
| ENSMUSG00000025321 | 2.062  | 3.005  | 21.321 | 0.000   | 0.000 | Itgb8                | MGI:1338035 | Itgb8      | integrin beta 8                                                                                       |
| ENSMUSG00000025323 | -1.191 | 3.183  | 9.522  | 0.002   | 0.035 | Sp4                  | MGI:107595  | Sp4        | trans-acting transcription factor 4                                                                   |

Table S1

| Genes              | logFC  | logCPM | LR     | P-value | FDR   | Associated gene name | MGI ID      | MGI symbol | MGI description                                             |
|--------------------|--------|--------|--------|---------|-------|----------------------|-------------|------------|-------------------------------------------------------------|
| ENSMUSG00000025347 | -0.619 | 6.147  | 9.085  | 0.003   | 0.041 | Mettl7b              | MGI:1918914 | Mettl7b    | methyltransferase like 7B                                   |
| ENSMUSG00000025809 | 0.692  | 8.067  | 10.380 | 0.001   | 0.024 | Itgb1                | MGI:96610   | Itgb1      | integrin beta 1 (fibronectin receptor beta)                 |
| ENSMUSG00000025921 | 1.410  | 6.142  | 33.198 | 0.000   | 0.000 | Rdh10                | MGI:1924238 | Rdh10      | retinol dehydrogenase 10 (all-trans)                        |
| ENSMUSG00000025937 | 0.770  | 4.760  | 10.111 | 0.001   | 0.027 | Lactb2               | MGI:2442551 | Lactb2     | lactamase, beta 2                                           |
| ENSMUSG00000025991 | 2.728  | 2.093  | 11.319 | 0.001   | 0.016 | Cps1                 | MGI:891996  | Cps1       | carbamoyl-phosphate synthetase 1                            |
| ENSMUSG00000026042 | 2.990  | 4.037  | 60.265 | 0.000   | 0.000 | Col5a2               | MGI:88458   | Col5a2     | collagen, type V, alpha 2                                   |
| ENSMUSG00000026043 | 2.082  | 6.803  | 92.466 | 0.000   | 0.000 | Col3a1               | MGI:88453   | Col3a1     | collagen, type III, alpha 1                                 |
| ENSMUSG00000026069 | 3.136  | 5.184  | 75.223 | 0.000   | 0.000 | Il1rl1               | MGI:98427   | Il1rl1     | interleukin 1 receptor-like 1                               |
| ENSMUSG00000026107 | 1.243  | 3.960  | 15.182 | 0.000   | 0.003 | Obfc2a               | MGI:1923258 | Obfc2a     | oligonucleotide/oligosaccharide-binding fold containing 2A  |
| ENSMUSG00000026110 | 0.857  | 7.996  | 15.291 | 0.000   | 0.003 | Mgat4a               | MGI:2662992 | Mgat4a     | mannoside acetylglucosaminyltransferase 4, isoenzyme A      |
| ENSMUSG00000026134 | 1.316  | 2.716  | 9.001  | 0.003   | 0.043 | Prim2                | MGI:97758   | Prim2      | DNA primase, p58 subunit                                    |
| ENSMUSG00000026185 | 1.802  | 6.018  | 52.727 | 0.000   | 0.000 | Igfbp5               | MGI:96440   | Igfbp5     | insulin-like growth factor binding protein 5                |
| ENSMUSG00000026193 | 1.750  | 5.218  | 58.937 | 0.000   | 0.000 | Fn1                  | MGI:95566   | Fn1        | fibronectin 1                                               |
| ENSMUSG00000026208 | -1.997 | 4.087  | 17.271 | 0.000   | 0.001 | Des                  | MGI:94885   | Des        | desmin                                                      |
| ENSMUSG00000026222 | -1.645 | 3.432  | 15.946 | 0.000   | 0.002 | Sp100                | MGI:109561  | Sp100      | nuclear antigen Sp100                                       |
| ENSMUSG00000026249 | 2.814  | 2.760  | 29.351 | 0.000   | 0.000 | Serpine2             | MGI:101780  | Serpine2   | serine (or cysteine) peptidase inhibitor, clade E, member 2 |
| ENSMUSG00000026305 | 0.781  | 6.912  | 14.150 | 0.000   | 0.005 | Lrrfip1              | MGI:1342770 | Lrrfip1    | leucine rich repeat (in FLII) interacting protein 1         |
| ENSMUSG00000026393 | 0.799  | 5.625  | 13.623 | 0.000   | 0.006 | Nek7                 | MGI:1890645 | Nek7       | NIMA (never in mitosis gene a)-related expressed kinase 7   |
| ENSMUSG00000026399 | 1.818  | 6.028  | 57.577 | 0.000   | 0.000 | Cd55                 | MGI:104850  | Cd55       | CD55 antigen                                                |
| ENSMUSG00000026421 | -1.156 | 3.983  | 13.446 | 0.000   | 0.006 | Csrp1                | MGI:88549   | Csrp1      | cysteine and glycine-rich protein 1                         |
| ENSMUSG00000026435 | 0.986  | 4.069  | 9.355  | 0.002   | 0.037 | Slc45a3              | MGI:1922082 | Slc45a3    | solute carrier family 45, member 3                          |
| ENSMUSG00000026437 | 1.037  | 5.081  | 20.834 | 0.000   | 0.000 | Cdk18                | MGI:97518   | Cdk18      | cyclin-dependent kinase 18                                  |
| ENSMUSG00000026463 | -1.244 | 3.629  | 12.837 | 0.000   | 0.008 | Atp2b4               | MGI:88111   | Atp2b4     | ATPase, Ca++ transporting, plasma membrane 4                |
| ENSMUSG00000026478 | 1.433  | 4.426  | 27.307 | 0.000   | 0.000 | Lamc1                | MGI:99914   | Lamc1      | laminin, gamma 1                                            |
| ENSMUSG00000026479 | 2.258  | 7.283  | 49.478 | 0.000   | 0.000 | Lamc2                | MGI:99913   | Lamc2      | laminin, gamma 2                                            |
| ENSMUSG00000026509 | 0.980  | 6.212  | 19.496 | 0.000   | 0.000 | Capn2                | MGI:88264   | Capn2      | calpain 2                                                   |
| ENSMUSG00000026547 | 0.872  | 5.871  | 15.744 | 0.000   | 0.002 | Tagln2               | MGI:1312985 | Tagln2     | transgelin 2                                                |
| ENSMUSG00000026614 | -1.104 | 3.800  | 10.221 | 0.001   | 0.026 | Slc30a10             | MGI:2685058 | Slc30a10   | solute carrier family 30, member 10                         |
| ENSMUSG00000026628 | 1.000  | 4.632  | 14.695 | 0.000   | 0.004 | Atf3                 | MGI:109384  | Atf3       | activating transcription factor 3                           |
| ENSMUSG00000026639 | 0.846  | 7.278  | 16.482 | 0.000   | 0.002 | Lamb3                | MGI:99915   | Lamb3      | laminin, beta 3                                             |



Table S1

| Genes              | logFC  | logCPM | LR     | P-value | FDR   | Associated gene name | MGI ID      | MGI symbol | MGI description                                                                              |
|--------------------|--------|--------|--------|---------|-------|----------------------|-------------|------------|----------------------------------------------------------------------------------------------|
| ENSMUSG00000026655 | 0.674  | 6.104  | 10.036 | 0.002   | 0.028 | Fam107b              | MGI:1913790 | Fam107b    | family with sequence similarity 107, member B                                                |
| ENSMUSG00000026664 | -1.201 | 5.306  | 28.316 | 0.000   | 0.000 | Phyh                 | MGI:891978  | Phyh       | phytanoyl-CoA hydroxylase                                                                    |
| ENSMUSG00000026675 | 0.774  | 5.276  | 12.135 | 0.000   | 0.011 | Hsd17b7              | MGI:1330808 | Hsd17b7    | hydroxysteroid (17-beta) dehydrogenase 7                                                     |
| ENSMUSG00000026728 | 1.162  | 3.614  | 11.001 | 0.001   | 0.018 | Vim                  | MGI:98932   | Vim        | vimentin                                                                                     |
| ENSMUSG00000026796 | 0.954  | 5.720  | 21.704 | 0.000   | 0.000 | Fam129b              | MGI:2442910 | Fam129b    | family with sequence similarity 129, member B                                                |
| ENSMUSG00000026797 | 1.036  | 4.346  | 12.549 | 0.000   | 0.009 | Stxbp1               | MGI:107363  | Stxbp1     | syntaxin binding protein 1                                                                   |
| ENSMUSG00000026832 | -1.679 | 2.918  | 15.938 | 0.000   | 0.002 | Cytip                | MGI:2183535 | Cytip      | cytohesin 1 interacting protein                                                              |
| ENSMUSG00000026836 | 1.435  | 3.825  | 17.353 | 0.000   | 0.001 | Acvr1                | MGI:87911   | Acvr1      | activin A receptor, type 1                                                                   |
| ENSMUSG00000026837 | 1.679  | 3.634  | 21.639 | 0.000   | 0.000 | Col5a1               | MGI:88457   | Col5a1     | collagen, type V, alpha 1                                                                    |
| ENSMUSG00000026922 | 0.902  | 5.387  | 13.417 | 0.000   | 0.006 | Agpat2               | MGI:1914762 | Agpat2     | 1-acylglycerol-3-phosphate O-acyltransferase 2 (lysophosphatidic acid acyltransferase, beta) |
| ENSMUSG00000026971 | 0.718  | 7.254  | 11.417 | 0.001   | 0.015 | Itgb6                | MGI:96615   | Itgb6      | integrin beta 6                                                                              |
| ENSMUSG00000026980 | -1.236 | 4.316  | 18.728 | 0.000   | 0.001 | Ly75                 | MGI:106662  | Ly75       | lymphocyte antigen 75                                                                        |
| ENSMUSG00000026981 | 2.370  | 7.502  | 75.825 | 0.000   | 0.000 | Il1rn                | MGI:96547   | Il1rn      | interleukin 1 receptor antagonist                                                            |
| ENSMUSG00000026987 | -0.759 | 5.542  | 9.927  | 0.002   | 0.029 | Baz2b                | MGI:2442782 | Baz2b      | bromodomain adjacent to zinc finger domain, 2B                                               |
| ENSMUSG00000026994 | 1.128  | 6.106  | 22.765 | 0.000   | 0.000 | Galnt3               | MGI:894695  | Galnt3     | UDP-N-acetyl-alpha-D-galactosamine:polypeptide N-acetylgalactosaminyltransferase 3           |
| ENSMUSG00000027087 | 1.038  | 8.724  | 21.480 | 0.000   | 0.000 | Itgav                | MGI:96608   | Itgav      | integrin alpha V                                                                             |
| ENSMUSG00000027111 | 1.205  | 8.379  | 30.551 | 0.000   | 0.000 | Itga6                | MGI:96605   | Itga6      | integrin alpha 6                                                                             |
| ENSMUSG00000027134 | 1.396  | 5.812  | 38.371 | 0.000   | 0.000 | Lpcat4               | MGI:2138993 | Lpcat4     | lysophosphatidylcholine acyltransferase 4                                                    |
| ENSMUSG00000027171 | 1.727  | 3.107  | 18.774 | 0.000   | 0.001 | Prrg4                | MGI:2442211 | Prrg4      | proline rich Gla (G-carboxyglutamic acid) 4 (transmembrane)                                  |
| ENSMUSG00000027187 | -0.789 | 5.291  | 13.265 | 0.000   | 0.007 | Cat                  | MGI:88271   | Cat        | catalase                                                                                     |
| ENSMUSG00000027203 | 1.234  | 2.796  | 8.808  | 0.003   | 0.047 | Dut                  | MGI:1346051 | Dut        | deoxyuridine triphosphatase                                                                  |
| ENSMUSG00000027204 | 1.297  | 3.594  | 13.131 | 0.000   | 0.007 | Fbn1                 | MGI:95489   | Fbn1       | fibrillin 1                                                                                  |
| ENSMUSG00000027225 | 2.182  | 6.648  | 41.387 | 0.000   | 0.000 | Duoxa2               | MGI:1914061 | Duoxa2     | dual oxidase maturation factor 2                                                             |
| ENSMUSG00000027227 | 1.045  | 4.043  | 9.710  | 0.002   | 0.032 | Sord                 | MGI:98266   | Sord       | sorbitol dehydrogenase                                                                       |
| ENSMUSG00000027282 | -0.684 | 5.926  | 11.139 | 0.001   | 0.017 | Mtch2                | MGI:1929260 | Mtch2      | mitochondrial carrier homolog 2 (C. elegans)                                                 |
| ENSMUSG00000027314 | 1.793  | 2.241  | 11.708 | 0.001   | 0.013 | Dll4                 | MGI:1859388 | Dll4       | delta-like 4 (Drosophila)                                                                    |
| ENSMUSG00000027333 | 1.289  | 5.383  | 30.464 | 0.000   | 0.000 | Smox                 | MGI:2445356 | Smox       | spermine oxidase                                                                             |
| ENSMUSG00000027358 | 0.774  | 4.936  | 11.412 | 0.001   | 0.015 | Bmp2                 | MGI:88177   | Bmp2       | bone morphogenetic protein 2                                                                 |
| ENSMUSG00000027359 | -3.670 | 2.000  | 10.281 | 0.001   | 0.025 | Slc27a2              | MGI:1347099 | Slc27a2    | solute carrier family 27 (fatty acid transporter), member 2                                  |

Table S1

| Genes              | logFC  | logCPM | LR     | P-value | FDR   | Associated gene name | MGI ID      | MGI symbol    | MGI description                                                                 |
|--------------------|--------|--------|--------|---------|-------|----------------------|-------------|---------------|---------------------------------------------------------------------------------|
| ENSMUSG00000027366 | -0.757 | 9.196  | 13.263 | 0.000   | 0.007 | 2010106G01Rik        | MGI:1913802 | 2010106G01Rik | RIKEN cDNA 2010106G01 gene                                                      |
| ENSMUSG00000027375 | -3.258 | 4.701  | 35.492 | 0.000   | 0.000 | Mal                  | MGI:892970  | Mal           | myelin and lymphocyte protein, T cell differentiation protein                   |
| ENSMUSG00000027398 | 2.227  | 2.619  | 12.859 | 0.000   | 0.008 | Il1b                 | MGI:96543   | Il1b          | interleukin 1 beta                                                              |
| ENSMUSG00000027420 | 3.312  | 1.679  | 20.271 | 0.000   | 0.000 | Bfsp1                | MGI:101770  | Bfsp1         | beaded filament structural protein 1, in lens-CP94                              |
| ENSMUSG00000027435 | 2.974  | 2.299  | 22.913 | 0.000   | 0.000 | Cd93                 | MGI:106664  | Cd93          | CD93 antigen                                                                    |
| ENSMUSG00000027457 | -1.766 | 2.372  | 10.214 | 0.001   | 0.026 | Snph                 | MGI:2139270 | Snph          | syntaphilin                                                                     |
| ENSMUSG00000027513 | -1.881 | 2.504  | 15.267 | 0.000   | 0.003 | Pck1                 | MGI:97501   | Pck1          | phosphoenolpyruvate carboxykinase 1, cytosolic                                  |
| ENSMUSG00000027559 | -2.486 | 3.945  | 28.706 | 0.000   | 0.000 | Car3                 | MGI:88270   | Car3          | carbonic anhydrase 3                                                            |
| ENSMUSG00000027580 | -0.730 | 6.270  | 11.992 | 0.001   | 0.012 | BC006779             | MGI:2385169 | BC006779      | cDNA sequence BC006779                                                          |
| ENSMUSG00000027597 | -1.330 | 5.266  | 34.202 | 0.000   | 0.000 | Ahcy                 | MGI:87968   | Ahcy          | S-adenosylhomocysteine hydrolase                                                |
| ENSMUSG00000027611 | 2.785  | 2.253  | 24.372 | 0.000   | 0.000 | Procr                | MGI:104596  | Procr         | protein C receptor, endothelial                                                 |
| ENSMUSG00000027639 | -0.949 | 5.305  | 17.218 | 0.000   | 0.001 | Samhd1               | MGI:1927468 | Samhd1        | SAM domain and HD domain, 1                                                     |
| ENSMUSG00000027669 | 1.381  | 2.688  | 9.968  | 0.002   | 0.029 | Gnb4                 | MGI:104581  | Gnb4          | guanine nucleotide binding protein (G protein), beta 4                          |
| ENSMUSG00000027698 | -0.884 | 4.735  | 12.339 | 0.000   | 0.010 | Nceh1                | MGI:2443191 | Nceh1         | arylacamide deacetylase-like 1                                                  |
| ENSMUSG00000027712 | 2.366  | 5.913  | 74.566 | 0.000   | 0.000 | Anxa5                | MGI:106008  | Anxa5         | annexin A5                                                                      |
| ENSMUSG00000027737 | 1.255  | 5.711  | 27.866 | 0.000   | 0.000 | Slc7a11              | MGI:1347355 | Slc7a11       | solute carrier family 7 (cationic amino acid transporter, y+ system), member 11 |
| ENSMUSG00000027797 | -2.246 | 2.489  | 16.366 | 0.000   | 0.002 | Dclk1                | MGI:1330861 | Dclk1         | doublecortin-like kinase 1                                                      |
| ENSMUSG00000027801 | 4.192  | 1.025  | 15.213 | 0.000   | 0.003 | Tm4sf4               | MGI:2385173 | Tm4sf4        | transmembrane 4 superfamily member 4                                            |
| ENSMUSG00000027864 | 0.702  | 6.396  | 11.653 | 0.001   | 0.014 | Ptgfrn               | MGI:1277114 | Ptgfrn        | prostaglandin F2 receptor negative regulator                                    |
| ENSMUSG00000027870 | -0.892 | 6.028  | 17.746 | 0.000   | 0.001 | Hao2                 | MGI:96012   | Hao2          | hydroxyacid oxidase 2                                                           |
| ENSMUSG00000027875 | -1.272 | 7.741  | 37.646 | 0.000   | 0.000 | Hmgcs2               | MGI:101939  | Hmgcs2        | 3-hydroxy-3-methylglutaryl-Coenzyme A synthase 2                                |
| ENSMUSG00000027907 | 1.418  | 6.258  | 32.793 | 0.000   | 0.000 | S100a11              | MGI:1338798 | S100a11       | S100 calcium binding protein A11 (calgizzarin)                                  |
| ENSMUSG00000028032 | -0.950 | 4.272  | 9.247  | 0.002   | 0.039 | Papss1               | MGI:1330587 | Papss1        | 3'-phosphoadenosine 5'-phosphosulfate synthase 1                                |
| ENSMUSG00000028063 | 0.767  | 6.225  | 13.550 | 0.000   | 0.006 | Lmna                 | MGI:96794   | Lmna          | lamin A                                                                         |
| ENSMUSG00000028073 | 2.286  | 2.553  | 22.182 | 0.000   | 0.000 | Pear1                | MGI:1920432 | Pear1         | platelet endothelial aggregation receptor 1                                     |
| ENSMUSG00000028088 | -0.759 | 5.872  | 12.133 | 0.000   | 0.011 | Fmo5                 | MGI:1310004 | Fmo5          | flavin containing monooxygenase 5                                               |
| ENSMUSG00000028108 | 1.694  | 2.792  | 13.913 | 0.000   | 0.005 | Ecm1                 | MGI:103060  | Ecm1          | extracellular matrix protein 1                                                  |
| ENSMUSG00000028128 | 3.110  | 6.586  | 52.089 | 0.000   | 0.000 | F3                   | MGI:88381   | F3            | coagulation factor III                                                          |
| ENSMUSG00000028158 | 3.545  | 1.575  | 18.220 | 0.000   | 0.001 | Mttp                 | MGI:106926  | Mttp          | microsomal triglyceride transfer protein                                        |

Table S1

| Genes              | logFC  | logCPM | LR     | P-value | FDR   | Associated gene name | MGI ID      | MGI symbol | MGI description                                                     |
|--------------------|--------|--------|--------|---------|-------|----------------------|-------------|------------|---------------------------------------------------------------------|
| ENSMUSG00000028194 | 0.730  | 6.186  | 12.255 | 0.000   | 0.011 | Ddah1                | MGI:1916469 | Ddah1      | dimethylarginine dimethylaminohydrolase 1                           |
| ENSMUSG00000028255 | -1.874 | 7.911  | 73.756 | 0.000   | 0.000 | Clca3                | MGI:1346342 | Clca3      | chloride channel calcium activated 3                                |
| ENSMUSG00000028256 | 1.424  | 3.053  | 10.942 | 0.001   | 0.019 | Odf2l                | MGI:1098600 | Odf2l      | outer dense fiber of sperm tails 2-like                             |
| ENSMUSG00000028270 | -1.560 | 4.325  | 22.449 | 0.000   | 0.000 | Gbp2                 | MGI:102772  | Gbp2       | guanylate binding protein 2                                         |
| ENSMUSG00000028273 | 0.774  | 5.741  | 14.186 | 0.000   | 0.005 | Pdlim5               | MGI:1927489 | Pdlim5     | PDZ and LIM domain 5                                                |
| ENSMUSG00000028339 | 2.012  | 2.571  | 13.762 | 0.000   | 0.005 | Col15a1              | MGI:88449   | Col15a1    | collagen, type XV, alpha 1                                          |
| ENSMUSG00000028364 | 1.601  | 4.863  | 44.931 | 0.000   | 0.000 | Tnc                  | MGI:101922  | Tnc        | tenascin C                                                          |
| ENSMUSG00000028370 | 3.300  | 3.147  | 36.494 | 0.000   | 0.000 | Pappa                | MGI:97479   | Pappa      | pregnancy-associated plasma protein A                               |
| ENSMUSG00000028389 | 2.098  | 2.647  | 16.163 | 0.000   | 0.002 | Zfp37                | MGI:99181   | Zfp37      | zinc finger protein 37                                              |
| ENSMUSG00000028403 | 0.714  | 7.818  | 11.045 | 0.001   | 0.018 | Zdhhc21              | MGI:1915518 | Zdhhc21    | zinc finger, DHHC domain containing 21                              |
| ENSMUSG00000028522 | -0.672 | 7.198  | 10.757 | 0.001   | 0.020 | Mier1                | MGI:1918398 | Mier1      | mesoderm induction early response 1 homolog (Xenopus laevis)        |
| ENSMUSG00000028527 | 1.387  | 4.120  | 13.278 | 0.000   | 0.007 | Ak4                  | MGI:87979   | Ak4        | adenylate kinase 4                                                  |
| ENSMUSG00000028617 | -1.000 | 5.679  | 22.785 | 0.000   | 0.000 | Lrrc42               | MGI:1925059 | Lrrc42     | leucine rich repeat containing 42                                   |
| ENSMUSG00000028645 | 0.634  | 8.262  | 8.872  | 0.003   | 0.046 | Slc2a1               | MGI:95755   | Slc2a1     | solute carrier family 2 (facilitated glucose transporter), member 1 |
| ENSMUSG00000028664 | 0.765  | 5.247  | 11.714 | 0.001   | 0.013 | Ephb2                | MGI:99611   | Ephb2      | Eph receptor B2                                                     |
| ENSMUSG00000028680 | 0.980  | 4.296  | 11.614 | 0.001   | 0.014 | Plk3                 | MGI:109604  | Plk3       | polo-like kinase 3 (Drosophila)                                     |
| ENSMUSG00000028696 | -1.679 | 2.146  | 8.836  | 0.003   | 0.046 | Ipp                  | MGI:96581   | Ipp        | IAP promoted placental gene                                         |
| ENSMUSG00000028713 | -2.230 | 2.125  | 11.361 | 0.001   | 0.016 | Cyp4b1               | MGI:103225  | Cyp4b1     | cytochrome P450, family 4, subfamily b, polypeptide 1               |
| ENSMUSG00000028763 | 0.950  | 4.156  | 9.567  | 0.002   | 0.034 | Hspg2                | MGI:96257   | Hspg2      | perlecan (heparan sulfate proteoglycan 2)                           |
| ENSMUSG00000028962 | -0.797 | 5.764  | 14.905 | 0.000   | 0.003 | Slc4a2               | MGI:109351  | Slc4a2     | solute carrier family 4 (anion exchanger), member 2                 |
| ENSMUSG00000028967 | 0.936  | 6.924  | 19.553 | 0.000   | 0.000 | Errfi1               | MGI:1921405 | Errfi1     | ERBB receptor feedback inhibitor 1                                  |
| ENSMUSG00000029154 | 1.892  | 6.332  | 48.437 | 0.000   | 0.000 | Cwh43                | MGI:2444131 | Cwh43      | cell wall biogenesis 43 C-terminal homolog (S. cerevisiae)          |
| ENSMUSG00000029231 | 1.592  | 4.569  | 31.801 | 0.000   | 0.000 | Pdgfra               | MGI:97530   | Pdgfra     | platelet derived growth factor receptor, alpha polypeptide          |
| ENSMUSG00000029260 | -0.822 | 7.161  | 13.792 | 0.000   | 0.005 | Ugt2b34              | MGI:2140962 | Ugt2b34    | UDP glucuronosyltransferase 2 family, polypeptide B34               |
| ENSMUSG00000029269 | -0.691 | 6.106  | 11.105 | 0.001   | 0.017 | Sult1b1              | MGI:2136282 | Sult1b1    | sulfotransferase family 1B, member 1                                |
| ENSMUSG00000029273 | -0.664 | 8.504  | 9.340  | 0.002   | 0.037 | Sult1d1              | MGI:1926341 | Sult1d1    | sulfotransferase family 1D, member 1                                |
| ENSMUSG00000029338 | 1.657  | 5.761  | 50.861 | 0.000   | 0.000 | Antxr2               | MGI:1919164 | Antxr2     | anthrax toxin receptor 2                                            |

Table S1

| Genes              | logFC  | logCPM | LR     | P-value | FDR   | Associated gene name | MGI ID      | MGI symbol | MGI description                                                                |
|--------------------|--------|--------|--------|---------|-------|----------------------|-------------|------------|--------------------------------------------------------------------------------|
| ENSMUSG00000029377 | 2.373  | 4.404  | 42.418 | 0.000   | 0.000 | Ereg                 | MGI:107508  | Ereg       | epiregulin                                                                     |
| ENSMUSG00000029378 | 1.103  | 4.677  | 18.878 | 0.000   | 0.001 | Areg                 | MGI:88068   | Areg       | amphiregulin                                                                   |
| ENSMUSG00000029416 | -2.055 | 2.332  | 12.254 | 0.000   | 0.011 | Slc15a4              | MGI:2140796 | Slc15a4    | solute carrier family 15, member 4                                             |
| ENSMUSG00000029484 | 1.694  | 5.553  | 56.997 | 0.000   | 0.000 | Anxa3                | MGI:1201378 | Anxa3      | annexin A3                                                                     |
| ENSMUSG00000029561 | -1.392 | 5.099  | 13.642 | 0.000   | 0.006 | Oasl2                | MGI:1344390 | Oasl2      | 2'-5' oligoadenylate synthetase-like 2                                         |
| ENSMUSG00000029580 | 0.703  | 11.801 | 11.591 | 0.001   | 0.014 | Actb                 | MGI:87904   | Actb       | actin, beta                                                                    |
| ENSMUSG00000029661 | 2.077  | 5.442  | 85.325 | 0.000   | 0.000 | Col1a2               | MGI:88468   | Col1a2     | collagen, type I, alpha 2                                                      |
| ENSMUSG00000029727 | -0.751 | 6.848  | 13.395 | 0.000   | 0.006 | Cyp3a13              | MGI:88610   | Cyp3a13    | cytochrome P450, family 3, subfamily a, polypeptide 13                         |
| ENSMUSG00000029762 | 1.255  | 4.818  | 24.921 | 0.000   | 0.000 | Akr1b8               | MGI:107673  | Akr1b8     | aldo-keto reductase family 1, member B8                                        |
| ENSMUSG00000029772 | -0.737 | 8.727  | 12.527 | 0.000   | 0.009 | Ahcy12               | MGI:1921590 | Ahcy12     | S-adenosylhomocysteine hydrolase-like 2                                        |
| ENSMUSG00000029798 | -2.044 | 3.706  | 12.364 | 0.000   | 0.010 | Herc6                | MGI:1914388 | Herc6      | hect domain and RLD 6                                                          |
| ENSMUSG00000029802 | -0.797 | 6.629  | 12.710 | 0.000   | 0.009 | Abcg2                | MGI:1347061 | Abcg2      | ATP-binding cassette, subfamily G (WHITE), member 2                            |
| ENSMUSG00000029811 | -1.158 | 5.598  | 19.611 | 0.000   | 0.000 | Abp1                 | MGI:1923757 | Abp1       | amiloride binding protein 1 (amine oxidase, copper-containing)                 |
| ENSMUSG00000029821 | -1.186 | 4.088  | 14.205 | 0.000   | 0.005 | Dfna5                | MGI:1889850 | Dfna5      | deafness, autosomal dominant 5 (human)                                         |
| ENSMUSG00000030017 | 3.219  | 4.227  | 12.329 | 0.000   | 0.010 | Reg3g                | MGI:109406  | Reg3g      | regenerating islet-derived 3 gamma                                             |
| ENSMUSG00000030064 | 0.769  | 5.664  | 13.747 | 0.000   | 0.005 | Frmd4b               | MGI:2141794 | Frmd4b     | FERM domain containing 4B                                                      |
| ENSMUSG00000030095 | 0.697  | 5.189  | 9.392  | 0.002   | 0.037 | Tmem43               | MGI:1921372 | Tmem43     | transmembrane protein 43                                                       |
| ENSMUSG00000030103 | 0.917  | 6.582  | 18.404 | 0.000   | 0.001 | Bhlhe40              | MGI:1097714 | Bhlhe40    | basic helix-loop-helix family, member e40                                      |
| ENSMUSG00000030110 | 2.594  | 3.474  | 35.073 | 0.000   | 0.000 | Ret                  | MGI:97902   | Ret        | ret proto-oncogene                                                             |
| ENSMUSG00000030155 | -0.917 | 5.525  | 17.156 | 0.000   | 0.001 | Clec2e               | MGI:3028921 | Clec2e     | C-type lectin domain family 2, member e                                        |
| ENSMUSG00000030162 | -1.604 | 2.394  | 9.385  | 0.002   | 0.037 | Olr1                 | MGI:1261434 | Olr1       | oxidized low density lipoprotein (lectin-like) receptor 1                      |
| ENSMUSG00000030342 | 0.672  | 6.494  | 10.677 | 0.001   | 0.021 | Cd9                  | MGI:88348   | Cd9        | CD9 antigen                                                                    |
| ENSMUSG00000030364 | -1.094 | 7.096  | 17.234 | 0.000   | 0.001 | Clec2h               | MGI:2136934 | Clec2h     | C-type lectin domain family 2, member h                                        |
| ENSMUSG00000030492 | 6.114  | 0.318  | 15.333 | 0.000   | 0.003 | Slc7a9               | MGI:1353656 | Slc7a9     | solute carrier family 7 (cationic amino acid transporter, y+ system), member 9 |
| ENSMUSG00000030530 | 0.623  | 5.555  | 8.953  | 0.003   | 0.044 | Furin                | MGI:97513   | Furin      | furin (paired basic amino acid cleaving enzyme)                                |
| ENSMUSG00000030536 | 0.747  | 8.010  | 12.116 | 0.000   | 0.011 | Iqgap1               | MGI:1352757 | Iqgap1     | IQ motif containing GTPase activating protein 1                                |

Table S1

| Genes              | logFC  | logCPM | LR     | P-value | FDR   | Associated gene name | MGI ID      | MGI symbol | MGI description                                         |
|--------------------|--------|--------|--------|---------|-------|----------------------|-------------|------------|---------------------------------------------------------|
| ENSMUSG00000030554 | -1.548 | 3.130  | 9.354  | 0.002   | 0.037 | Synm                 | MGI:2661187 | Synm       | synemin, intermediate filament protein                  |
| ENSMUSG00000030560 | 1.036  | 5.639  | 19.729 | 0.000   | 0.000 | Ctsc                 | MGI:109553  | Ctsc       | cathepsin C                                             |
| ENSMUSG00000030711 | -1.933 | 3.967  | 29.276 | 0.000   | 0.000 | Sult1a1              | MGI:102896  | Sult1a1    | sulfotransferase family 1A, phenol-preferring, member 1 |
| ENSMUSG00000030747 | 0.978  | 7.058  | 21.522 | 0.000   | 0.000 | Dgat2                | MGI:1915050 | Dgat2      | diacylglycerol O-acyltransferase 2                      |
| ENSMUSG00000030748 | 0.793  | 5.262  | 13.276 | 0.000   | 0.007 | Il4ra                | MGI:105367  | Il4ra      | interleukin 4 receptor, alpha                           |
| ENSMUSG00000030762 | -1.387 | 7.931  | 38.524 | 0.000   | 0.000 | Aqp8                 | MGI:1195271 | Aqp8       | aquaporin 8                                             |
| ENSMUSG00000030849 | -1.912 | 5.731  | 77.281 | 0.000   | 0.000 | Fgfr2                | MGI:95523   | Fgfr2      | fibroblast growth factor receptor 2                     |
| ENSMUSG00000031075 | 1.489  | 3.972  | 18.939 | 0.000   | 0.001 | Ano1                 | MGI:2142149 | Ano1       | anoctamin 1, calcium activated chloride channel         |
| ENSMUSG00000031098 | 1.798  | 2.543  | 13.864 | 0.000   | 0.005 | Syt8                 | MGI:1859867 | Syt8       | synaptotagmin VIII                                      |
| ENSMUSG00000031375 | 1.685  | 3.898  | 26.559 | 0.000   | 0.000 | Bgn                  | MGI:88158   | Bgn        | biglycan                                                |
| ENSMUSG00000031430 | 2.178  | 2.680  | 18.096 | 0.000   | 0.001 | Vsig1                | MGI:1926039 | Vsig1      | V-set and immunoglobulin domain containing 1            |
| ENSMUSG00000031431 | -1.329 | 3.583  | 13.861 | 0.000   | 0.005 | Tsc22d3              | MGI:1196284 | Tsc22d3    | TSC22 domain family, member 3                           |
| ENSMUSG00000031441 | -1.225 | 6.651  | 31.775 | 0.000   | 0.000 | Atp11a               | MGI:1354735 | Atp11a     | ATPase, class VI, type 11A                              |
| ENSMUSG00000031442 | -1.252 | 3.334  | 11.219 | 0.001   | 0.017 | Mcf2l                | MGI:103263  | Mcf2l      | mcf.2 transforming sequence-like                        |
| ENSMUSG00000031451 | -0.703 | 5.263  | 10.301 | 0.001   | 0.025 | Gas6                 | MGI:95660   | Gas6       | growth arrest specific 6                                |
| ENSMUSG00000031502 | 1.617  | 5.190  | 40.530 | 0.000   | 0.000 | Col4a1               | MGI:88454   | Col4a1     | collagen, type IV, alpha 1                              |
| ENSMUSG00000031503 | 1.983  | 4.344  | 48.679 | 0.000   | 0.000 | Col4a2               | MGI:88455   | Col4a2     | collagen, type IV, alpha 2                              |
| ENSMUSG00000031511 | 0.621  | 5.783  | 8.875  | 0.003   | 0.046 | Arhgef7              | MGI:1860493 | Arhgef7    | Rho guanine nucleotide exchange factor (GEF7)           |
| ENSMUSG00000031530 | 2.074  | 4.036  | 36.285 | 0.000   | 0.000 | Dusp4                | MGI:2442191 | Dusp4      | dual specificity phosphatase 4                          |
| ENSMUSG00000031538 | 3.002  | 3.092  | 29.432 | 0.000   | 0.000 | Plat                 | MGI:97610   | Plat       | plasminogen activator, tissue                           |
| ENSMUSG00000031551 | -2.271 | 3.049  | 26.613 | 0.000   | 0.000 | Ido1                 | MGI:96416   | Ido1       | indoleamine 2,3-dioxygenase 1                           |
| ENSMUSG00000031584 | 0.651  | 6.195  | 10.025 | 0.002   | 0.028 | Gsr                  | MGI:95804   | Gsr        | glutathione reductase                                   |
| ENSMUSG00000031618 | -0.728 | 6.755  | 12.159 | 0.000   | 0.011 | Nr3c2                | MGI:99459   | Nr3c2      | nuclear receptor subfamily 3, group C, member 2         |
| ENSMUSG00000031621 | -1.166 | 5.081  | 25.740 | 0.000   | 0.000 | Isx                  | MGI:1918847 | Isx        | intestine specific homeobox                             |
| ENSMUSG00000031740 | 2.347  | 2.607  | 23.349 | 0.000   | 0.000 | Mmp2                 | MGI:97009   | Mmp2       | matrix metalloproteinase 2                              |
| ENSMUSG00000031762 | 1.391  | 3.257  | 9.551  | 0.002   | 0.034 | Mt2                  | MGI:97172   | Mt2        | metallothionein 2                                       |
| ENSMUSG00000031765 | 1.454  | 5.370  | 28.680 | 0.000   | 0.000 | Mt1                  | MGI:97171   | Mt1        | metallothionein 1                                       |
| ENSMUSG00000031799 | 1.196  | 5.525  | 25.034 | 0.000   | 0.000 | Tpm4                 | MGI:2449202 | Tpm4       | tropomyosin 4                                           |
| ENSMUSG00000031844 | -0.933 | 5.728  | 18.635 | 0.000   | 0.001 | Hsd17b2              | MGI:1096386 | Hsd17b2    | hydroxysteroid (17-beta) dehydrogenase 2                |
| ENSMUSG00000032010 | -2.469 | 1.367  | 10.012 | 0.002   | 0.028 | Usp2                 | MGI:1858178 | Usp2       | ubiquitin specific peptidase 2                          |
| ENSMUSG00000032013 | 2.780  | 3.928  | 42.338 | 0.000   | 0.000 | Trim29               | MGI:1919419 | Trim29     | tripartite motif-containing 29                          |
| ENSMUSG00000032035 | 0.913  | 4.162  | 9.346  | 0.002   | 0.037 | Ets1                 | MGI:95455   | Ets1       | E26 avian leukemia oncogene 1, 5' domain                |

Table S1

| Genes              | logFC  | logCPM | LR     | P-value | FDR   | Associated gene name | MGI ID      | MGI symbol    | MGI description                                                       |
|--------------------|--------|--------|--------|---------|-------|----------------------|-------------|---------------|-----------------------------------------------------------------------|
| ENSMUSG00000032038 | 1.768  | 4.860  | 28.952 | 0.000   | 0.000 | St3gal4              | MGI:1316743 | St3gal4       | ST3 beta-galactoside alpha-2,3-sialyltransferase 4                    |
| ENSMUSG00000032068 | 1.851  | 6.629  | 15.578 | 0.000   | 0.002 | 1600029D21Rik        | MGI:1923759 | 1600029D21Rik | RIKEN cDNA 1600029D21 gene                                            |
| ENSMUSG00000032085 | -2.283 | 4.060  | 44.619 | 0.000   | 0.000 | Tagln                | MGI:106012  | Tagln         | transgelin                                                            |
| ENSMUSG00000032122 | -2.401 | 2.538  | 18.109 | 0.000   | 0.001 | Slc37a2              | MGI:1929693 | Slc37a2       | solute carrier family 37 (glycerol-3-phosphate transporter), member 2 |
| ENSMUSG00000032231 | 1.197  | 8.767  | 28.966 | 0.000   | 0.000 | Anxa2                | MGI:88246   | Anxa2         | annexin A2                                                            |
| ENSMUSG00000032232 | 1.404  | 4.211  | 15.838 | 0.000   | 0.002 | Cgnl1                | MGI:1915428 | Cgnl1         | cingulin-like 1                                                       |
| ENSMUSG00000032280 | -1.022 | 4.920  | 14.766 | 0.000   | 0.003 | Tle3                 | MGI:104634  | Tle3          | transducin-like enhancer of split 3, homolog of Drosophila E(spl)     |
| ENSMUSG00000032281 | 2.980  | 3.279  | 39.772 | 0.000   | 0.000 | Acsbg1               | MGI:2385656 | Acsbg1        | acyl-CoA synthetase bubblegum family member 1                         |
| ENSMUSG00000032324 | -0.919 | 6.567  | 19.802 | 0.000   | 0.000 | Tspan3               | MGI:1928098 | Tspan3        | tetraspanin 3                                                         |
| ENSMUSG00000032332 | 2.020  | 5.071  | 47.208 | 0.000   | 0.000 | Col12a1              | MGI:88448   | Col12a1       | collagen, type XII, alpha 1                                           |
| ENSMUSG00000032359 | 0.773  | 4.839  | 10.692 | 0.001   | 0.021 | Ctsh                 | MGI:107285  | Ctsh          | cathepsin H                                                           |
| ENSMUSG00000032377 | -1.508 | 3.218  | 15.080 | 0.000   | 0.003 | Plscr4               | MGI:2143267 | Plscr4        | phospholipid scramblase 4                                             |
| ENSMUSG00000032410 | -0.802 | 4.823  | 10.546 | 0.001   | 0.022 | Xrn1                 | MGI:891964  | Xrn1          | 5'-3' exoribonuclease 1                                               |
| ENSMUSG00000032418 | 1.249  | 5.507  | 33.077 | 0.000   | 0.000 | Me1                  | MGI:97043   | Me1           | malic enzyme 1, NADP(+)-dependent, cytosolic                          |
| ENSMUSG00000032420 | 1.595  | 6.664  | 54.844 | 0.000   | 0.000 | Nt5e                 | MGI:99782   | Nt5e          | 5' nucleotidase, ecto                                                 |
| ENSMUSG00000032440 | 1.047  | 5.703  | 24.753 | 0.000   | 0.000 | Tgfr2                | MGI:98729   | Tgfr2         | transforming growth factor, beta receptor II                          |
| ENSMUSG00000032462 | 0.967  | 4.459  | 12.929 | 0.000   | 0.008 | Pik3cb               | MGI:1922019 | Pik3cb        | phosphatidylinositol 3-kinase, catalytic, beta polypeptide            |
| ENSMUSG00000032487 | 3.051  | 4.560  | 26.854 | 0.000   | 0.000 | Ptgs2                | MGI:97798   | Ptgs2         | prostaglandin-endoperoxide synthase 2                                 |
| ENSMUSG00000032501 | 0.704  | 5.529  | 9.592  | 0.002   | 0.034 | Trib1                | MGI:2443397 | Trib1         | tribbles homolog 1 (Drosophila)                                       |
| ENSMUSG00000032528 | -0.849 | 5.670  | 15.679 | 0.000   | 0.002 | Vipr1                | MGI:109272  | Vipr1         | vasoactive intestinal peptide receptor 1                              |
| ENSMUSG00000032548 | -1.647 | 5.385  | 49.641 | 0.000   | 0.000 | Slco2a1              | MGI:1346021 | Slco2a1       | solute carrier organic anion transporter family, member 2a1           |
| ENSMUSG00000032570 | 1.057  | 6.346  | 21.706 | 0.000   | 0.000 | Atp2c1               | MGI:1889008 | Atp2c1        | ATPase, Ca <sup>++</sup> -sequestering                                |
| ENSMUSG00000032572 | 1.420  | 4.071  | 19.708 | 0.000   | 0.000 | Col6a4               | MGI:1915803 | Col6a4        | collagen, type VI, alpha 4                                            |
| ENSMUSG00000032589 | 1.319  | 3.176  | 9.568  | 0.002   | 0.034 | Bsn                  | MGI:1277955 | Bsn           | bassoon                                                               |
| ENSMUSG00000032661 | -1.091 | 5.249  | 9.346  | 0.002   | 0.037 | Oas3                 | MGI:2180850 | Oas3          | 2'-5' oligoadenylate synthetase 3                                     |
| ENSMUSG00000032724 | 2.851  | 2.241  | 22.007 | 0.000   | 0.000 | Abtb2                | MGI:2139365 | Abtb2         | ankyrin repeat and BTB (POZ) domain containing 2                      |
| ENSMUSG00000032727 | -1.388 | 5.970  | 31.057 | 0.000   | 0.000 | Mier3                | MGI:2442317 | Mier3         | mesoderm induction early response 1, family member 3                  |
| ENSMUSG00000032769 | 3.007  | 2.275  | 27.686 | 0.000   | 0.000 | Trpa1                | MGI:3522699 | Trpa1         | transient receptor potential cation channel, subfamily A, member 1    |
| ENSMUSG00000032796 | 2.900  | 1.751  | 13.521 | 0.000   | 0.006 | Lama1                | MGI:99892   | Lama1         | laminin, alpha 1                                                      |

Table S1

| Genes              | logFC  | logCPM | LR     | P-value | FDR   | Associated gene name | MGI ID      | MGI symbol    | MGI description                                                       |
|--------------------|--------|--------|--------|---------|-------|----------------------|-------------|---------------|-----------------------------------------------------------------------|
| ENSMUSG00000032802 | 0.727  | 6.909  | 10.565 | 0.001   | 0.022 | Srxn1                | MGI:104971  | Srxn1         | sulfiredoxin 1 homolog (S. cerevisiae)                                |
| ENSMUSG00000032849 | 1.914  | 3.890  | 31.790 | 0.000   | 0.000 | Abcc4                | MGI:2443111 | Abcc4         | ATP-binding cassette, sub-family C (CFTR/MRP), member 4               |
| ENSMUSG00000032902 | -1.021 | 7.797  | 23.502 | 0.000   | 0.000 | Slc16a1              | MGI:106013  | Slc16a1       | solute carrier family 16 (monocarboxylic acid transporters), member 1 |
| ENSMUSG00000033149 | 1.782  | 5.249  | 44.761 | 0.000   | 0.000 | Phldb2               | MGI:2444981 | Phldb2        | pleckstrin homology-like domain, family B, member 2                   |
| ENSMUSG00000033213 | 0.614  | 6.670  | 8.899  | 0.003   | 0.045 | AA467197             | MGI:3034182 | AA467197      | expressed sequence AA467197                                           |
| ENSMUSG00000033308 | -1.755 | 4.292  | 25.112 | 0.000   | 0.000 | Dpyd                 | MGI:2139667 | Dpyd          | dihydropyrimidine dehydrogenase                                       |
| ENSMUSG00000033420 | 2.049  | 2.764  | 21.488 | 0.000   | 0.000 | Antxr1               | MGI:1916788 | Antxr1        | anthrax toxin receptor 1                                              |
| ENSMUSG00000033715 | -1.239 | 5.527  | 28.295 | 0.000   | 0.000 | Akr1c14              | MGI:2145458 | Akr1c14       | aldo-keto reductase family 1, member C14                              |
| ENSMUSG00000033717 | -1.204 | 6.258  | 33.545 | 0.000   | 0.000 | Adra2a               | MGI:87934   | Adra2a        | adrenergic receptor, alpha 2a                                         |
| ENSMUSG00000033781 | -2.268 | 2.334  | 19.477 | 0.000   | 0.000 | Asb13                | MGI:2145525 | Asb13         | ankyrin repeat and SOCS box-containing 13                             |
| ENSMUSG00000033955 | 0.797  | 5.436  | 14.126 | 0.000   | 0.005 | Tnks1bp1             | MGI:2446193 | Tnks1bp1      | tankyrase 1 binding protein 1                                         |
| ENSMUSG00000033998 | 0.914  | 5.927  | 14.564 | 0.000   | 0.004 | Kcnk1                | MGI:109322  | Kcnk1         | potassium channel, subfamily K, member 1                              |
| ENSMUSG00000034005 | -3.056 | 1.207  | 12.115 | 0.001   | 0.011 |                      |             |               |                                                                       |
| ENSMUSG00000034157 | -0.873 | 4.747  | 12.512 | 0.000   | 0.009 | 2310044G17Rik        | MGI:1919185 | 2310044G17Rik | RIKEN cDNA 2310044G17 gene                                            |
| ENSMUSG00000034187 | 0.887  | 4.593  | 9.537  | 0.002   | 0.034 | Nsf                  | MGI:104560  | Nsf           | N-ethylmaleimide sensitive fusion protein                             |
| ENSMUSG00000034205 | 2.006  | 3.314  | 26.158 | 0.000   | 0.000 | Loxl2                | MGI:2137913 | Loxl2         | lysyl oxidase-like 2                                                  |
| ENSMUSG00000034320 | -0.974 | 8.947  | 21.944 | 0.000   | 0.000 | Slc26a2              | MGI:892977  | Slc26a2       | solute carrier family 26 (sulfate transporter), member 2              |
| ENSMUSG00000034382 | 0.988  | 5.359  | 19.878 | 0.000   | 0.000 | Al661453             | MGI:2146908 | Al661453      | expressed sequence Al661453                                           |
| ENSMUSG00000034413 | -0.785 | 5.777  | 13.460 | 0.000   | 0.006 | Neurl1b              | MGI:3643092 | Neurl1b       | neuralized homolog 1b (Drosophila)                                    |
| ENSMUSG00000034449 | -1.166 | 4.328  | 16.223 | 0.000   | 0.002 | Dhrs11               | MGI:2652816 | Dhrs11        | dehydrogenase/reductase (SDR family) member 11                        |
| ENSMUSG00000034528 | -3.065 | 1.999  | 14.277 | 0.000   | 0.004 | Hsd17b13             | MGI:2140804 | Hsd17b13      | hydroxysteroid (17-beta) dehydrogenase 13                             |
| ENSMUSG00000034570 | -1.010 | 4.548  | 12.683 | 0.000   | 0.009 | Inpp5j               | MGI:2158663 | Inpp5j        | inositol polyphosphate 5-phosphatase J                                |
| ENSMUSG00000034579 | -1.793 | 3.470  | 22.809 | 0.000   | 0.000 | Pla2g3               | MGI:2444945 | Pla2g3        | phospholipase A2, group III                                           |
| ENSMUSG00000034613 | -0.717 | 4.830  | 8.761  | 0.003   | 0.048 | Ppm1h                | MGI:2442087 | Ppm1h         | protein phosphatase 1H (PP2C domain containing)                       |
| ENSMUSG00000034634 | 3.842  | 2.520  | 35.517 | 0.000   | 0.000 | Ly6d                 | MGI:96881   | Ly6d          | lymphocyte antigen 6 complex, locus D                                 |
| ENSMUSG00000034731 | -1.091 | 4.238  | 14.088 | 0.000   | 0.005 | Dgkh                 | MGI:2444188 | Dgkh          | diacylglycerol kinase, eta                                            |

Table S1

| Genes              | logFC  | logCPM | LR     | P-value | FDR   | Associated gene name | MGI ID      | MGI symbol | MGI description                                                                               |
|--------------------|--------|--------|--------|---------|-------|----------------------|-------------|------------|-----------------------------------------------------------------------------------------------|
| ENSMUSG00000034765 | 1.985  | 3.542  | 27.047 | 0.000   | 0.000 | Dusp5                | MGI:2685183 | Dusp5      | dual specificity phosphatase 5                                                                |
| ENSMUSG00000034785 | -2.512 | 3.239  | 35.334 | 0.000   | 0.000 | Dio1                 | MGI:94896   | Dio1       | deiodinase, iodothyronine, type I                                                             |
| ENSMUSG00000035069 | -0.968 | 4.800  | 15.599 | 0.000   | 0.002 | Oma1                 | MGI:1914263 | Oma1       | OMA1 homolog, zinc metallopeptidase ( <i>S. cerevisiae</i> )                                  |
| ENSMUSG00000035105 | 0.692  | 6.312  | 11.302 | 0.001   | 0.016 | Egln3                | MGI:1932288 | Egln3      | EGL nine homolog 3 ( <i>C. elegans</i> )                                                      |
| ENSMUSG00000035184 | 2.756  | 2.632  | 19.008 | 0.000   | 0.001 | Fam124a              | MGI:3645930 | Fam124a    | family with sequence similarity 124, member A                                                 |
| ENSMUSG00000035202 | 1.245  | 11.101 | 10.667 | 0.001   | 0.021 | Lars2                | MGI:2142973 | Lars2      | leucyl-tRNA synthetase, mitochondrial                                                         |
| ENSMUSG00000035493 | 1.620  | 3.955  | 22.636 | 0.000   | 0.000 | Tgfb1                | MGI:99959   | Tgfb1      | transforming growth factor, beta induced                                                      |
| ENSMUSG00000035783 | -1.387 | 3.859  | 15.628 | 0.000   | 0.002 | Acta2                | MGI:87909   | Acta2      | actin, alpha 2, smooth muscle, aorta                                                          |
| ENSMUSG00000036123 | -1.056 | 4.273  | 10.774 | 0.001   | 0.020 | Slc9a3               | MGI:105064  | Slc9a3     | solute carrier family 9 (sodium/hydrogen exchanger), member 3                                 |
| ENSMUSG00000036256 | 1.537  | 3.193  | 14.910 | 0.000   | 0.003 | Igfbp7               | MGI:1352480 | Igfbp7     | insulin-like growth factor binding protein 7                                                  |
| ENSMUSG00000036309 | 0.664  | 6.750  | 10.035 | 0.002   | 0.028 | Skp1a                | MGI:103575  | Skp1a      | S-phase kinase-associated protein 1A                                                          |
| ENSMUSG00000036438 | 0.645  | 7.762  | 9.048  | 0.003   | 0.042 | Calm2                | MGI:103250  | Calm2      | calmodulin 2                                                                                  |
| ENSMUSG00000036492 | 1.888  | 3.094  | 18.432 | 0.000   | 0.001 | Rnf39                | MGI:2156378 | Rnf39      | ring finger protein 39                                                                        |
| ENSMUSG00000036545 | 3.092  | 1.127  | 11.441 | 0.001   | 0.015 | Adamts2              | MGI:1347356 | Adamts2    | a disintegrin-like and metallopeptidase (reprolysin type) with thrombospondin type 1 motif, 2 |
| ENSMUSG00000036594 | -1.763 | 4.462  | 22.957 | 0.000   | 0.000 | H2-Aa                | MGI:95895   | H2-Aa      | histocompatibility 2, class II antigen A, alpha                                               |
| ENSMUSG00000037033 | 1.119  | 7.445  | 14.289 | 0.000   | 0.004 | Clca4                | MGI:2181989 | Clca4      | chloride channel calcium activated 4                                                          |
| ENSMUSG00000037071 | -1.602 | 5.907  | 44.638 | 0.000   | 0.000 | Scd1                 | MGI:98239   | Scd1       | stearoyl-Coenzyme A desaturase 1                                                              |
| ENSMUSG00000037106 | -0.896 | 5.753  | 15.957 | 0.000   | 0.002 | Fer116               | MGI:3645398 | Fer116     | fer-1-like 6 ( <i>C. elegans</i> )                                                            |
| ENSMUSG00000037242 | 1.171  | 5.101  | 26.836 | 0.000   | 0.000 | Clic4                | MGI:1352754 | Clic4      | chloride intracellular channel 4 (mitochondrial)                                              |
| ENSMUSG00000037253 | 1.182  | 5.890  | 31.871 | 0.000   | 0.000 | Mex3c                | MGI:2652843 | Mex3c      | mex3 homolog C ( <i>C. elegans</i> )                                                          |
| ENSMUSG00000037295 | 1.586  | 3.833  | 22.339 | 0.000   | 0.000 | Ldlrap1              | MGI:2140175 | Ldlrap1    | low density lipoprotein receptor adaptor protein 1                                            |
| ENSMUSG00000037321 | -1.021 | 4.133  | 11.333 | 0.001   | 0.016 | Tap1                 | MGI:98483   | Tap1       | transporter 1, ATP-binding cassette, sub-family B (MDR/TAP)                                   |
| ENSMUSG00000037411 | 3.027  | 2.343  | 26.487 | 0.000   | 0.000 | Serpine1             | MGI:97608   | Serpine1   | serine (or cysteine) peptidase inhibitor, clade E, member 1                                   |



Table S1

| Genes              | logFC  | logCPM | LR     | P-value | FDR   | Associated gene name | MGI ID      | MGI symbol | MGI description                                                                   |
|--------------------|--------|--------|--------|---------|-------|----------------------|-------------|------------|-----------------------------------------------------------------------------------|
| ENSMUSG00000037580 | 1.287  | 4.912  | 28.246 | 0.000   | 0.000 | Gch1                 | MGI:95675   | Gch1       | GTP cyclohydrolase 1                                                              |
| ENSMUSG00000037613 | 2.691  | 5.699  | 86.111 | 0.000   | 0.000 | Tnfrsf23             | MGI:1930269 | Tnfrsf23   | tumor necrosis factor receptor superfamily, member 23                             |
| ENSMUSG00000037661 | -1.097 | 4.306  | 12.149 | 0.000   | 0.011 | Gpr160               | MGI:1919112 | Gpr160     | G protein-coupled receptor 160                                                    |
| ENSMUSG00000037788 | 1.565  | 3.583  | 18.339 | 0.000   | 0.001 | Vopp1                | MGI:2141658 | Vopp1      | vesicular, overexpressed in cancer, prosurvival protein 1                         |
| ENSMUSG00000037820 | 1.684  | 6.582  | 43.511 | 0.000   | 0.000 | Tgm2                 | MGI:98731   | Tgm2       | transglutaminase 2, C polypeptide                                                 |
| ENSMUSG00000037940 | -1.673 | 2.490  | 11.915 | 0.001   | 0.012 | Inpp4b               | MGI:2158925 | Inpp4b     | inositol polyphosphate-4-phosphatase, type II                                     |
| ENSMUSG00000037946 | 1.195  | 4.411  | 17.534 | 0.000   | 0.001 | Fgd3                 | MGI:1353657 | Fgd3       | FYVE, RhoGEF and PH domain containing 3                                           |
| ENSMUSG00000038119 | -2.978 | 1.499  | 11.627 | 0.001   | 0.014 | Cdon                 | MGI:1926387 | Cdon       | cell adhesion molecule-related/down-regulated by oncogenes                        |
| ENSMUSG00000038156 | 1.111  | 3.341  | 8.730  | 0.003   | 0.049 | Spon1                | MGI:2385287 | Spon1      | spondin 1, (f-spondin) extracellular matrix protein                               |
| ENSMUSG00000038264 | 1.476  | 5.851  | 38.038 | 0.000   | 0.000 | Sema7a               | MGI:1306826 | Sema7a     | sema domain, immunoglobulin domain (Ig), and GPI membrane anchor, (semaphorin) 7A |
| ENSMUSG00000038344 | -1.294 | 4.780  | 28.857 | 0.000   | 0.000 | Txlng                | MGI:3590652 | Txlng      | taxilin gamma                                                                     |
| ENSMUSG00000038388 | -1.227 | 5.326  | 29.633 | 0.000   | 0.000 | Mpp6                 | MGI:1927340 | Mpp6       | membrane protein, palmitoylated 6 (MAGUK p55 subfamily member 6)                  |
| ENSMUSG00000038400 | 2.221  | 5.769  | 64.620 | 0.000   | 0.000 | Pmepa1               | MGI:1929600 | Pmepa1     | prostate transmembrane protein, androgen induced 1                                |
| ENSMUSG00000038418 | 1.700  | 4.104  | 22.896 | 0.000   | 0.000 | Egr1                 | MGI:95295   | Egr1       | early growth response 1                                                           |
| ENSMUSG00000038642 | -0.844 | 6.399  | 16.573 | 0.000   | 0.002 | Ctss                 | MGI:107341  | Ctss       | cathepsin S                                                                       |
| ENSMUSG00000038697 | -1.196 | 2.882  | 8.847  | 0.003   | 0.046 | Taf5l                | MGI:1919039 | Taf5l      | TAF5-like RNA polymerase II, p300/CBP-associated factor (PCAF)-associated factor  |
| ENSMUSG00000038745 | -0.893 | 5.063  | 15.979 | 0.000   | 0.002 | Nlrp6                | MGI:2141990 | Nlrp6      | NLR family, pyrin domain containing 6                                             |
| ENSMUSG00000038843 | 1.966  | 2.574  | 17.559 | 0.000   | 0.001 | Gcnt1                | MGI:95676   | Gcnt1      | glucosaminyl (N-acetyl) transferase 1, core 2                                     |
| ENSMUSG00000038894 | -1.003 | 4.383  | 12.563 | 0.000   | 0.009 | Irs2                 | MGI:109334  | Irs2       | insulin receptor substrate 2                                                      |
| ENSMUSG00000039007 | -1.676 | 2.715  | 10.138 | 0.001   | 0.027 | Pgcp                 | MGI:1889205 | Pgcp       | plasma glutamate carboxypeptidase                                                 |
| ENSMUSG00000039286 | 0.975  | 4.974  | 18.387 | 0.000   | 0.001 | Fndc3b               | MGI:1919257 | Fndc3b     | fibronectin type III domain containing 3B                                         |
| ENSMUSG00000039304 | -1.290 | 3.563  | 12.694 | 0.000   | 0.009 | Tnfsf10              | MGI:107414  | Tnfsf10    | tumor necrosis factor (ligand) superfamily, member 10                             |
| ENSMUSG00000039364 | -2.041 | 6.358  | 90.604 | 0.000   | 0.000 | Sectm1b              | MGI:1929083 | Sectm1b    | secreted and transmembrane 1B                                                     |

Table S1

| Genes              | logFC  | logCPM | LR     | P-value | FDR   | Associated gene name | MGI ID      | MGI symbol    | MGI description                                               |
|--------------------|--------|--------|--------|---------|-------|----------------------|-------------|---------------|---------------------------------------------------------------|
| ENSMUSG00000039840 | 1.240  | 5.551  | 32.562 | 0.000   | 0.000 | 5430411K18Rik        | MGI:1918673 | 5430411K18Rik | RIKEN cDNA 5430411K18 gene                                    |
| ENSMUSG00000040152 | 1.291  | 4.805  | 20.513 | 0.000   | 0.000 | Thbs1                | MGI:98737   | Thbs1         | thrombospondin 1                                              |
| ENSMUSG00000040253 | -2.093 | 3.138  | 16.926 | 0.000   | 0.001 | Gbp7                 | MGI:2444421 | Gbp7          | guanylate binding protein 7                                   |
| ENSMUSG00000040430 | 1.227  | 3.397  | 10.123 | 0.001   | 0.027 | Pitpnc1              | MGI:1919045 | Pitpnc1       | phosphatidylinositol transfer protein, cytoplasmic 1          |
| ENSMUSG00000040447 | 2.998  | 3.831  | 61.145 | 0.000   | 0.000 | Spns2                | MGI:2384936 | Spns2         | spinster homolog 2 (Drosophila)                               |
| ENSMUSG00000040498 | 1.126  | 5.398  | 23.501 | 0.000   | 0.000 | 2210010C17Rik        | MGI:1917330 | 2210010C17Rik | RIKEN cDNA 2210010C17 gene                                    |
| ENSMUSG00000040606 | -1.234 | 3.998  | 11.288 | 0.001   | 0.016 | Kazn                 | MGI:1918779 | Kazn          | kazrin, periplakin interacting protein                        |
| ENSMUSG00000040734 | 1.364  | 2.752  | 10.143 | 0.001   | 0.027 | Ppp1r13l             | MGI:3525053 | Ppp1r13l      | protein phosphatase 1, regulatory (inhibitor) subunit 13 like |
| ENSMUSG00000040746 | -0.896 | 4.210  | 9.057  | 0.003   | 0.042 | Rnf167               | MGI:1917760 | Rnf167        | ring finger protein 167                                       |
| ENSMUSG00000040811 | 1.299  | 3.760  | 12.390 | 0.000   | 0.010 | Eml2                 | MGI:1919455 | Eml2          | echinoderm microtubule associated protein like 2              |
| ENSMUSG00000040990 | 1.058  | 4.761  | 18.547 | 0.000   | 0.001 | Sh3kbp1              | MGI:1889583 | Sh3kbp1       | SH3-domain kinase binding protein 1                           |
| ENSMUSG00000041120 | 1.470  | 3.856  | 19.256 | 0.000   | 0.000 | Nb1                  | MGI:104591  | Nb1           | neuroblastoma, suppression of tumorigenicity 1                |
| ENSMUSG00000041189 | 2.955  | 1.193  | 9.138  | 0.003   | 0.041 | Chrnbl               | MGI:87890   | Chrnbl        | cholinergic receptor, nicotinic, beta polypeptide 1 (muscle)  |
| ENSMUSG00000041482 | 2.748  | 2.389  | 26.110 | 0.000   | 0.000 | Fam38b               | MGI:1918781 | Fam38b        | family with sequence similarity 38, member B                  |
| ENSMUSG00000041731 | -2.850 | 2.837  | 29.483 | 0.000   | 0.000 | Pgm5                 | MGI:1925668 | Pgm5          | phosphoglucomutase 5                                          |
| ENSMUSG00000041957 | 0.714  | 5.699  | 12.031 | 0.001   | 0.012 | Pkp2                 | MGI:1914701 | Pkp2          | plakophilin 2                                                 |
| ENSMUSG00000042121 | 1.157  | 4.571  | 19.996 | 0.000   | 0.000 | Ssh1                 | MGI:2686240 | Ssh1          | slingshot homolog 1 (Drosophila)                              |
| ENSMUSG00000042286 | 1.470  | 2.553  | 8.713  | 0.003   | 0.049 | Stab1                | MGI:2178742 | Stab1         | stabilin 1                                                    |
| ENSMUSG00000042306 | 1.126  | 6.002  | 25.736 | 0.000   | 0.000 | S100a14              | MGI:1913416 | S100a14       | S100 calcium binding protein A14                              |
| ENSMUSG00000042379 | 4.022  | 1.512  | 14.913 | 0.000   | 0.003 | Esm1                 | MGI:1918940 | Esm1          | endothelial cell-specific molecule 1                          |
| ENSMUSG00000042507 | -0.666 | 5.972  | 8.904  | 0.003   | 0.045 | C130039O16Rik        | MGI:2685106 | C130039O16Rik | RIKEN cDNA C130039O16 gene                                    |
| ENSMUSG00000042810 | 1.159  | 3.806  | 11.947 | 0.001   | 0.012 | Krba1                | MGI:1925077 | Krba1         | KRAB-A domain containing 1                                    |
| ENSMUSG00000042978 | -4.377 | 0.336  | 10.857 | 0.001   | 0.020 | Sbk1                 | MGI:2135937 | Sbk1          | SH3-binding kinase 1                                          |
| ENSMUSG00000043079 | -1.466 | 4.729  | 36.038 | 0.000   | 0.000 | Synpo                | MGI:1099446 | Synpo         | synaptopodin                                                  |
| ENSMUSG00000043613 | 4.234  | 1.301  | 15.140 | 0.000   | 0.003 | Mmp3                 | MGI:97010   | Mmp3          | matrix metalloproteinase 3                                    |
| ENSMUSG00000043924 | 2.465  | 1.548  | 9.522  | 0.002   | 0.035 | A330049M08Rik        | MGI:2444888 | A330049M08Rik | RIKEN cDNA A330049M08 gene                                    |
| ENSMUSG00000044156 | -1.201 | 3.378  | 10.627 | 0.001   | 0.022 | Hepacam2             | MGI:2141520 | Hepacam2      | HEPACAM family member 2                                       |
| ENSMUSG00000044162 | 0.933  | 4.522  | 9.118  | 0.003   | 0.041 | Tnip3                | MGI:3041165 | Tnip3         | TNFAIP3 interacting protein 3                                 |
| ENSMUSG00000044229 | -4.347 | 4.095  | 86.652 | 0.000   | 0.000 | Fam55d               | MGI:1924792 | Fam55d        | family with sequence similarity 55, member D                  |

Table S1

| Genes              | logFC  | logCPM | LR     | P-value | FDR   | Associated gene name | MGI ID      | MGI symbol | MGI description                                                                              |
|--------------------|--------|--------|--------|---------|-------|----------------------|-------------|------------|----------------------------------------------------------------------------------------------|
| ENSMUSG00000044359 | -2.767 | 2.526  | 19.609 | 0.000   | 0.000 | P2ry4                | MGI:1926594 | P2ry4      | pyrimidinergic receptor P2Y, G-protein coupled, 4                                            |
| ENSMUSG00000044674 | 1.720  | 4.473  | 29.868 | 0.000   | 0.000 | Fzd1                 | MGI:1196625 | Fzd1       | frizzled homolog 1 (Drosophila)                                                              |
| ENSMUSG00000044681 | 3.203  | 2.458  | 27.839 | 0.000   | 0.000 | Cnpy1                | MGI:2442451 | Cnpy1      | canopy 1 homolog (zebrafish)                                                                 |
| ENSMUSG00000044827 | -1.192 | 3.752  | 10.829 | 0.001   | 0.020 | Tlr1                 | MGI:1341295 | Tlr1       | toll-like receptor 1                                                                         |
| ENSMUSG00000044986 | -1.274 | 3.679  | 13.587 | 0.000   | 0.006 | Tst                  | MGI:98852   | Tst        | thiosulfate sulfurtransferase, mitochondrial                                                 |
| ENSMUSG00000045027 | 2.996  | 3.310  | 36.321 | 0.000   | 0.000 | Prss22               | MGI:1918085 | Prss22     | protease, serine, 22                                                                         |
| ENSMUSG00000045038 | -1.081 | 4.116  | 13.024 | 0.000   | 0.008 | Prkce                | MGI:97599   | Prkce      | protein kinase C, epsilon                                                                    |
| ENSMUSG00000045103 | -1.547 | 3.151  | 13.924 | 0.000   | 0.005 | Dmd                  | MGI:94909   | Dmd        | dystrophin, muscular dystrophy                                                               |
| ENSMUSG00000045316 | -1.329 | 2.708  | 9.313  | 0.002   | 0.038 | Fahd1                | MGI:1915886 | Fahd1      | fumarylacetoacetate hydrolase domain containing 1                                            |
| ENSMUSG00000045382 | 2.206  | 1.744  | 9.937  | 0.002   | 0.029 | Cxcr4                | MGI:109563  | Cxcr4      | chemokine (C-X-C motif) receptor 4                                                           |
| ENSMUSG00000045775 | -0.969 | 4.413  | 12.240 | 0.000   | 0.011 | Slc16a5              | MGI:2443515 | Slc16a5    | solute carrier family 16 (monocarboxylic acid transporters), member 5                        |
| ENSMUSG00000045991 | 2.279  | 3.576  | 36.842 | 0.000   | 0.000 | Onecut2              | MGI:1891408 | Onecut2    | one cut domain, family member 2                                                              |
| ENSMUSG00000046027 | -1.083 | 5.689  | 26.610 | 0.000   | 0.000 | Stard5               | MGI:2156765 | Stard5     | StAR-related lipid transfer (START) domain containing 5                                      |
| ENSMUSG00000046169 | 3.916  | 0.846  | 11.836 | 0.001   | 0.013 | Adamts6              | MGI:1347348 | Adamts6    | a disintegrin-like and metallopeptidase (repolysin type) with thrombospondin type 1 motif, 6 |
| ENSMUSG00000046223 | 2.213  | 4.687  | 37.767 | 0.000   | 0.000 | Plaur                | MGI:97612   | Plaur      | plasminogen activator, urokinase receptor                                                    |
| ENSMUSG00000046364 | -1.597 | 2.874  | 9.418  | 0.002   | 0.036 | Rpl27a               | MGI:1347076 | Rpl27a     | ribosomal protein L27A                                                                       |
| ENSMUSG00000046402 | 1.595  | 2.238  | 8.717  | 0.003   | 0.049 | Rbp1                 | MGI:97876   | Rbp1       | retinol binding protein 1, cellular                                                          |
| ENSMUSG00000046618 | 3.777  | 0.772  | 9.607  | 0.002   | 0.034 | Olfml2a              | MGI:2444741 | Olfml2a    | olfactomedin-like 2A                                                                         |
| ENSMUSG00000046731 | 1.375  | 2.993  | 9.589  | 0.002   | 0.034 | Kctd11               | MGI:2448712 | Kctd11     | potassium channel tetramerisation domain containing 11                                       |
| ENSMUSG00000046733 | 1.004  | 7.342  | 20.691 | 0.000   | 0.000 | Gprc5a               | MGI:1891250 | Gprc5a     | G protein-coupled receptor, family C, group 5, member A                                      |
| ENSMUSG00000047021 | 3.946  | 2.214  | 20.353 | 0.000   | 0.000 | Ccdc108              | MGI:2444274 | Ccdc108    | coiled-coil domain containing 108                                                            |
| ENSMUSG00000047281 | 0.803  | 5.933  | 14.475 | 0.000   | 0.004 | Sfn                  | MGI:1891831 | Sfn        | stratifin                                                                                    |
| ENSMUSG00000047496 | -1.070 | 6.044  | 23.149 | 0.000   | 0.000 | Rnf152               | MGI:2443787 | Rnf152     | ring finger protein 152                                                                      |
| ENSMUSG00000047501 | 1.358  | 7.693  | 35.926 | 0.000   | 0.000 | Cldn4                | MGI:1313314 | Cldn4      | claudin 4                                                                                    |
| ENSMUSG00000047562 | 4.123  | 3.637  | 51.772 | 0.000   | 0.000 | Mmp10                | MGI:97007   | Mmp10      | matrix metallopeptidase 10                                                                   |
| ENSMUSG00000047730 | -0.987 | 9.984  | 18.707 | 0.000   | 0.001 | Fcgbp                | MGI:2444336 | Fcgbp      | Fc fragment of IgG binding protein                                                           |
| ENSMUSG00000047797 | 1.604  | 2.472  | 10.312 | 0.001   | 0.025 | Gjb1                 | MGI:95719   | Gjb1       | gap junction protein, beta 1                                                                 |

Table S1

| Genes              | logFC  | logCPM | LR     | P-value | FDR   | Associated gene name | MGI ID      | MGI symbol    | MGI description                                                               |
|--------------------|--------|--------|--------|---------|-------|----------------------|-------------|---------------|-------------------------------------------------------------------------------|
| ENSMUSG00000047945 | 2.072  | 6.280  | 69.760 | 0.000   | 0.000 | Marcksl1             | MGI:97143   | Marcksl1      | MARCKS-like 1                                                                 |
| ENSMUSG00000048126 | 2.590  | 5.032  | 97.338 | 0.000   | 0.000 | Col6a3               | MGI:88461   | Col6a3        | collagen, type VI, alpha 3                                                    |
| ENSMUSG00000048249 | -0.744 | 5.751  | 12.180 | 0.000   | 0.011 | A930001N09Rik        | MGI:1924378 | A930001N09Rik | RIKEN cDNA A930001N09 gene                                                    |
| ENSMUSG00000048373 | -1.565 | 4.287  | 27.907 | 0.000   | 0.000 | Fgfbp1               | MGI:1096350 | Fgfbp1        | fibroblast growth factor binding protein 1                                    |
| ENSMUSG00000048376 | 1.790  | 3.408  | 21.449 | 0.000   | 0.000 | F2r                  | MGI:101802  | F2r           | coagulation factor II (thrombin) receptor                                     |
| ENSMUSG00000048486 | -1.590 | 2.420  | 10.161 | 0.001   | 0.027 | Fitm2                | MGI:2444508 | Fitm2         | fat storage-inducing transmembrane protein 2                                  |
| ENSMUSG00000048572 | -2.626 | 2.283  | 17.273 | 0.000   | 0.001 | E030010A14Rik        | MGI:3583948 | E030010A14Rik | RIKEN cDNA E030010A14 gene                                                    |
| ENSMUSG00000048612 | 1.657  | 6.095  | 44.202 | 0.000   | 0.000 | Myof                 | MGI:1919192 | Myof          | myoferlin                                                                     |
| ENSMUSG00000048696 | 4.569  | 0.319  | 9.651  | 0.002   | 0.033 | Mex3d                | MGI:2681847 | Mex3d         | mex3 homolog D (C. elegans)                                                   |
| ENSMUSG00000048960 | 1.671  | 3.275  | 15.910 | 0.000   | 0.002 | Prex2                | MGI:1923385 | Prex2         | phosphatidylinositol-3,4,5-trisphosphate-dependent Rac exchange factor 2      |
| ENSMUSG00000049313 | -0.974 | 7.202  | 21.387 | 0.000   | 0.000 | Sorl1                | MGI:1202296 | Sorl1         | sortilin-related receptor, LDLR class A repeats-containing                    |
| ENSMUSG00000049350 | -1.285 | 7.349  | 31.466 | 0.000   | 0.000 | Zg16                 | MGI:1916286 | Zg16          | zymogen granule protein 16                                                    |
| ENSMUSG00000049382 | 0.705  | 10.791 | 11.764 | 0.001   | 0.013 | Krt8                 | MGI:96705   | Krt8          | keratin 8                                                                     |
| ENSMUSG00000049719 | 3.209  | 1.018  | 9.348  | 0.002   | 0.037 | Prss46               | MGI:1921556 | Prss46        | protease, serine, 46                                                          |
| ENSMUSG00000049723 | 4.205  | 1.010  | 14.716 | 0.000   | 0.003 | Mmp12                | MGI:97005   | Mmp12         | matrix metalloproteinase 12                                                   |
| ENSMUSG00000049775 | 0.715  | 7.773  | 12.003 | 0.001   | 0.012 | Tmsb4x               | MGI:99510   | Tmsb4x        | thymosin, beta 4, X chromosome                                                |
| ENSMUSG00000049858 | 2.099  | 5.363  | 41.915 | 0.000   | 0.000 | Suox                 | MGI:2446117 | Suox          | sulfite oxidase                                                               |
| ENSMUSG00000050315 | -1.587 | 3.880  | 21.221 | 0.000   | 0.000 | Synpo2               | MGI:2153070 | Synpo2        | synaptopodin 2                                                                |
| ENSMUSG00000050359 | 1.624  | 6.346  | 39.302 | 0.000   | 0.000 | Sprr1a               | MGI:106660  | Sprr1a        | small proline-rich protein 1A                                                 |
| ENSMUSG00000050578 | 2.987  | 4.275  | 27.845 | 0.000   | 0.000 | Mmp13                | MGI:1340026 | Mmp13         | matrix metalloproteinase 13                                                   |
| ENSMUSG00000050747 | 1.265  | 4.610  | 9.247  | 0.002   | 0.039 | Trim15               | MGI:1916347 | Trim15        | tripartite motif-containing 15                                                |
| ENSMUSG00000050953 | 2.265  | 3.544  | 35.748 | 0.000   | 0.000 | Gja1                 | MGI:95713   | Gja1          | gap junction protein, alpha 1                                                 |
| ENSMUSG00000050982 | -1.845 | 5.042  | 62.400 | 0.000   | 0.000 | Apol10a              | MGI:3036238 | Apol10a       | apolipoprotein L 10a                                                          |
| ENSMUSG00000051022 | 2.108  | 2.397  | 16.670 | 0.000   | 0.001 | Hs3st1               | MGI:1201606 | Hs3st1        | heparan sulfate (glucosamine) 3-O-sulfotransferase 1                          |
| ENSMUSG00000052305 | 1.448  | 3.938  | 10.452 | 0.001   | 0.023 | Hbb-b1               | MGI:96021   | Hbb-b1        | hemoglobin, beta adult major chain                                            |
| ENSMUSG00000052353 | 3.296  | 3.489  | 23.134 | 0.000   | 0.000 | 9930013L23Rik        | MGI:2443629 | 9930013L23Rik | RIKEN cDNA 9930013L23 gene                                                    |
| ENSMUSG00000052485 | -1.189 | 4.666  | 20.086 | 0.000   | 0.000 | Tmem171              | MGI:2685751 | Tmem171       | transmembrane protein 171                                                     |
| ENSMUSG00000052516 | 3.088  | 1.637  | 13.535 | 0.000   | 0.006 | Robo2                | MGI:1890110 | Robo2         | roundabout homolog 2 (Drosophila)                                             |
| ENSMUSG00000052609 | 0.866  | 5.474  | 15.781 | 0.000   | 0.002 | Plekhg3              | MGI:2388284 | Plekhg3       | pleckstrin homology domain containing, family G (with RhoGef domain) member 3 |
| ENSMUSG00000052713 | 0.849  | 4.506  | 10.553 | 0.001   | 0.022 | Zfp608               | MGI:2442338 | Zfp608        | zinc finger protein 608                                                       |
| ENSMUSG00000052837 | 0.797  | 4.956  | 11.330 | 0.001   | 0.016 | Junb                 | MGI:96647   | Junb          | Jun-B oncogene                                                                |

Table S1

| Genes              | logFC  | logCPM | LR     | P-value | FDR   | Associated gene name | MGI ID      | MGI symbol    | MGI description                                                                                |
|--------------------|--------|--------|--------|---------|-------|----------------------|-------------|---------------|------------------------------------------------------------------------------------------------|
| ENSMUSG00000052997 | 0.791  | 4.518  | 9.448  | 0.002   | 0.036 | Uba2                 | MGI:1858313 | Uba2          | ubiquitin-like modifier activating enzyme 2                                                    |
| ENSMUSG00000053062 | 1.485  | 2.855  | 12.670 | 0.000   | 0.009 | Jam2                 | MGI:1933820 | Jam2          | junction adhesion molecule 2                                                                   |
| ENSMUSG00000053279 | -1.411 | 6.785  | 30.944 | 0.000   | 0.000 | Aldh1a1              | MGI:1353450 | Aldh1a1       | aldehyde dehydrogenase family 1, subfamily A1                                                  |
| ENSMUSG00000053399 | -5.022 | 0.890  | 15.513 | 0.000   | 0.002 | Adamts18             | MGI:2442600 | Adamts18      | a disintegrin-like and metallopeptidase (reprolysin type) with thrombospondin type 1 motif, 18 |
| ENSMUSG00000053846 | -1.118 | 3.858  | 8.937  | 0.003   | 0.044 | Lipg                 | MGI:1341803 | Lipg          | lipase, endothelial                                                                            |
| ENSMUSG00000053907 | -0.999 | 7.633  | 21.816 | 0.000   | 0.000 | Mat2a                | MGI:2443731 | Mat2a         | methionine adenosyltransferase II, alpha                                                       |
| ENSMUSG00000054072 | -2.551 | 3.098  | 19.869 | 0.000   | 0.000 | ligp1                | MGI:1926259 | ligp1         | interferon inducible GTPase 1                                                                  |
| ENSMUSG00000054128 | -1.913 | 3.851  | 27.819 | 0.000   | 0.000 | H2-T3                | MGI:95959   | H2-T3         | histocompatibility 2, T region locus 3                                                         |
| ENSMUSG00000054619 | -1.432 | 4.972  | 36.328 | 0.000   | 0.000 | Mettl7a1             | MGI:1916523 | Mettl7a1      | methyltransferase like 7A1                                                                     |
| ENSMUSG00000054662 | -1.136 | 4.434  | 18.037 | 0.000   | 0.001 | Ano9                 | MGI:1918595 | Ano9          | anoctamin 9                                                                                    |
| ENSMUSG00000054958 | 1.377  | 3.274  | 12.219 | 0.000   | 0.011 | Nt5c1a               | MGI:2155700 | Nt5c1a        | 5'-nucleotidase, cytosolic IA                                                                  |
| ENSMUSG00000054999 | 2.882  | 2.546  | 12.451 | 0.000   | 0.010 | Naaladl1             | MGI:2685810 | Naaladl1      | N-acetylated alpha-linked acidic dipeptidase-like 1                                            |
| ENSMUSG00000055322 | -1.156 | 4.787  | 23.462 | 0.000   | 0.000 | Tns1                 | MGI:104552  | Tns1          | tensin 1                                                                                       |
| ENSMUSG00000055730 | -1.832 | 7.314  | 38.827 | 0.000   | 0.000 | Ces2a                | MGI:2142491 | Ces2a         | carboxylesterase 2A                                                                            |
| ENSMUSG00000055748 | -0.921 | 8.035  | 12.857 | 0.000   | 0.008 | Gsdmc4               | MGI:1921798 | Gsdmc4        | gasdermin C4                                                                                   |
| ENSMUSG00000055976 | 0.688  | 5.094  | 9.768  | 0.002   | 0.031 | Cldn23               | MGI:1919158 | Cldn23        | claudin 23                                                                                     |
| ENSMUSG00000056148 | -1.022 | 4.033  | 9.872  | 0.002   | 0.030 | Rdh9                 | MGI:2143528 | Rdh9          | retinol dehydrogenase 9                                                                        |
| ENSMUSG00000056293 | -1.233 | 7.305  | 27.038 | 0.000   | 0.000 | Gsdmc2               | MGI:2146102 | Gsdmc2        | gasdermin C2                                                                                   |
| ENSMUSG00000056310 | -2.341 | 2.143  | 12.954 | 0.000   | 0.008 | Tyw1                 | MGI:2141161 | Tyw1          | tRNA-yW synthesizing protein 1 homolog (S. cerevisiae)                                         |
| ENSMUSG00000056492 | 1.667  | 2.529  | 10.784 | 0.001   | 0.020 | Gpr116               | MGI:2182928 | Gpr116        | G protein-coupled receptor 116                                                                 |
| ENSMUSG00000056515 | 1.425  | 4.369  | 24.244 | 0.000   | 0.000 | Rab31                | MGI:1914603 | Rab31         | RAB31, member RAS oncogene family                                                              |
| ENSMUSG00000056737 | 1.022  | 6.077  | 19.764 | 0.000   | 0.000 | Capg                 | MGI:1098259 | Capg          | capping protein (actin filament), gelsolin-like                                                |
| ENSMUSG00000057074 | -1.789 | 4.827  | 48.698 | 0.000   | 0.000 | Ces1g                | MGI:88378   | Ces1g         | carboxylesterase 1G                                                                            |
| ENSMUSG00000057335 | 1.757  | 2.602  | 13.018 | 0.000   | 0.008 | Cep170               | MGI:1918348 | Cep170        | centrosomal protein 170                                                                        |
| ENSMUSG00000057421 | 1.363  | 4.169  | 15.080 | 0.000   | 0.003 | Las1l                | MGI:1923380 | Las1l         | LAS1-like (S. cerevisiae)                                                                      |
| ENSMUSG00000057666 | -1.806 | 6.093  | 10.197 | 0.001   | 0.026 | Gapdh                | MGI:95640   | Gapdh         | glyceraldehyde-3-phosphate dehydrogenase                                                       |
| ENSMUSG00000057880 | -1.141 | 3.514  | 9.860  | 0.002   | 0.030 | Abat                 | MGI:2443582 | Abat          | 4-aminobutyrate aminotransferase                                                               |
| ENSMUSG00000058013 | 0.891  | 5.592  | 18.445 | 0.000   | 0.001 | 11-Sep               | MGI:1277214 | 11-Sep        | septin 11                                                                                      |
| ENSMUSG00000058022 | -1.341 | 3.868  | 16.334 | 0.000   | 0.002 | 9530008L14Rik        | MGI:1924596 | 9530008L14Rik | RIKEN cDNA 9530008L14 gene                                                                     |
| ENSMUSG00000058163 | -2.048 | 2.731  | 15.482 | 0.000   | 0.002 | Gm5431               | MGI:3645205 | Gm5431        | predicted gene 5431                                                                            |
| ENSMUSG00000059149 | 1.381  | 6.438  | 40.025 | 0.000   | 0.000 | Mfsd4                | MGI:2442786 | Mfsd4         | major facilitator superfamily                                                                  |

Table S1

| Genes              | logFC  | logCPM | LR     | P-value | FDR   | Associated gene name | MGI ID      | MGI symbol    | MGI description                                                                                                                      |
|--------------------|--------|--------|--------|---------|-------|----------------------|-------------|---------------|--------------------------------------------------------------------------------------------------------------------------------------|
| ENSMUSG00000059430 | -4.007 | 2.908  | 38.800 | 0.000   | 0.000 | Actg2                | MGI:104589  | Actg2         | domain containing 4<br>actin, gamma 2, smooth muscle, enteric                                                                        |
| ENSMUSG00000059447 | -0.912 | 4.827  | 13.361 | 0.000   | 0.006 | Hadhb                | MGI:2136381 | Hadhb         | hydroxyacyl-Coenzyme A dehydrogenase/3-ketoacyl-Coenzyme A thiolase/enoyl-Coenzyme A hydratase (trifunctional protein), beta subunit |
| ENSMUSG00000059713 | 1.240  | 4.309  | 19.719 | 0.000   | 0.000 | Rcan3                | MGI:1858220 | Rcan3         | regulator of calcineurin 3                                                                                                           |
| ENSMUSG00000060477 | -0.903 | 4.451  | 8.943  | 0.003   | 0.044 | Irak2                | MGI:2429603 | Irak2         | interleukin-1 receptor-associated kinase 2                                                                                           |
| ENSMUSG00000060487 | 2.630  | 2.340  | 19.905 | 0.000   | 0.000 | Samd5                | MGI:2444815 | Samd5         | sterile alpha motif domain containing 5                                                                                              |
| ENSMUSG00000060802 | -1.356 | 7.449  | 28.861 | 0.000   | 0.000 | B2m                  | MGI:88127   | B2m           | beta-2 microglobulin                                                                                                                 |
| ENSMUSG00000060981 | -2.747 | 1.460  | 10.531 | 0.001   | 0.023 | Hist1h4h             | MGI:2448427 | Hist1h4h      | histone cluster 1, H4h                                                                                                               |
| ENSMUSG00000061728 | -2.875 | 1.676  | 10.027 | 0.002   | 0.028 | Btnl7                | MGI:2388054 | Btnl7         | butyrophilin-like 7                                                                                                                  |
| ENSMUSG00000061825 | -0.918 | 6.399  | 17.464 | 0.000   | 0.001 | Ces2c                | MGI:2385905 | Ces2c         | carboxylesterase 2C                                                                                                                  |
| ENSMUSG00000062185 | -1.099 | 5.106  | 19.655 | 0.000   | 0.000 |                      |             |               |                                                                                                                                      |
| ENSMUSG00000062410 | -1.251 | 5.988  | 35.862 | 0.000   | 0.000 | Hsd3b3               | MGI:96235   | Hsd3b3        | hydroxy-delta-5-steroid dehydrogenase, 3 beta- and steroid delta-isomerase 3                                                         |
| ENSMUSG00000062515 | -1.607 | 2.734  | 10.680 | 0.001   | 0.021 | Fabp4                | MGI:88038   | Fabp4         | fatty acid binding protein 4, adipocyte                                                                                              |
| ENSMUSG00000062638 | -1.479 | 4.825  | 31.394 | 0.000   | 0.000 | Btnl1                | MGI:1932027 | Btnl1         | butyrophilin-like 1                                                                                                                  |
| ENSMUSG00000062647 | -1.492 | 3.978  | 14.010 | 0.000   | 0.005 | Rpl7a                | MGI:1353472 | Rpl7a         | ribosomal protein L7A                                                                                                                |
| ENSMUSG00000062991 | 3.369  | 2.279  | 21.530 | 0.000   | 0.000 | Nrg1                 | MGI:96083   | Nrg1          | neuregulin 1                                                                                                                         |
| ENSMUSG00000063522 | 1.003  | 7.707  | 13.920 | 0.000   | 0.005 | 2010109I03Rik        | MGI:1914288 | 2010109I03Rik | RIKEN cDNA 2010109I03 gene                                                                                                           |
| ENSMUSG00000063727 | 3.065  | 3.249  | 42.398 | 0.000   | 0.000 | Tnfrsf11b            | MGI:109587  | Tnfrsf11b     | tumor necrosis factor receptor superfamily, member 11b (osteoprotegerin)                                                             |
| ENSMUSG00000063730 | -0.852 | 4.361  | 9.333  | 0.002   | 0.037 | Hsd3b2               | MGI:96234   | Hsd3b2        | hydroxy-delta-5-steroid dehydrogenase, 3 beta- and steroid delta-isomerase 2                                                         |
| ENSMUSG00000064254 | -0.682 | 6.176  | 9.197  | 0.002   | 0.039 | Ethe1                | MGI:1913321 | Ethe1         | ethylmalonic encephalopathy 1                                                                                                        |
| ENSMUSG00000064373 | -0.921 | 8.366  | 19.493 | 0.000   | 0.000 | Sepp1                | MGI:894288  | Sepp1         | selenoprotein P, plasma, 1                                                                                                           |
| ENSMUSG00000066861 | -1.389 | 3.014  | 9.752  | 0.002   | 0.032 | Oas1g                | MGI:97429   | Oas1g         | 2'-5' oligoadenylate synthetase 1G                                                                                                   |
| ENSMUSG00000066877 | -0.779 | 4.732  | 9.964  | 0.002   | 0.029 | Nck2                 | MGI:1306821 | Nck2          | non-catalytic region of tyrosine kinase adaptor protein 2                                                                            |
| ENSMUSG00000067818 | -3.167 | 1.917  | 16.701 | 0.000   | 0.001 | Myl9                 | MGI:2138915 | Myl9          | myosin, light polypeptide 9, regulatory                                                                                              |
| ENSMUSG00000068284 | -0.672 | 7.117  | 10.850 | 0.001   | 0.020 | Gm608                | MGI:2685454 | Gm608         | predicted gene 608                                                                                                                   |
| ENSMUSG00000068452 | 1.779  | 8.782  | 41.015 | 0.000   | 0.000 | Duox2                | MGI:3036280 | Duox2         | dual oxidase 2                                                                                                                       |

Table S1

| Genes              | logFC  | logCPM | LR     | P-value | FDR   | Associated gene name | MGI ID      | MGI symbol    | MGI description                                               |
|--------------------|--------|--------|--------|---------|-------|----------------------|-------------|---------------|---------------------------------------------------------------|
| ENSMUSG00000068547 | 0.728  | 11.514 | 9.900  | 0.002   | 0.029 | Ctca6                | MGI:2139744 | Ctca6         | chloride channel calcium activated 6                          |
| ENSMUSG00000068566 | 0.865  | 5.942  | 16.349 | 0.000   | 0.002 | Myadm                | MGI:1355332 | Myadm         | myeloid-associated differentiation marker                     |
| ENSMUSG00000068874 | -1.406 | 7.063  | 39.527 | 0.000   | 0.000 | Selenbp1             | MGI:96825   | Selenbp1      | selenium binding protein 1                                    |
| ENSMUSG00000069601 | -1.332 | 5.393  | 38.043 | 0.000   | 0.000 | Ank3                 | MGI:88026   | Ank3          | ankyrin 3, epithelial                                         |
| ENSMUSG00000069874 | -1.095 | 4.472  | 16.987 | 0.000   | 0.001 | Irgm2                | MGI:1926262 | Irgm2         | immunity-related GTPase family M member 2                     |
| ENSMUSG00000070047 | 0.995  | 9.765  | 21.521 | 0.000   | 0.000 | Fat1                 | MGI:109168  | Fat1          | FAT tumor suppressor homolog 1 (Drosophila)                   |
| ENSMUSG00000070056 | 0.706  | 5.059  | 10.252 | 0.001   | 0.026 | Mfhas1               | MGI:1098644 | Mfhas1        | malignant fibrous histiocytoma amplified sequence 1           |
| ENSMUSG00000070305 | 0.717  | 5.704  | 12.366 | 0.000   | 0.010 | Mpzl3                | MGI:2442647 | Mpzl3         | myelin protein zero-like 3                                    |
| ENSMUSG00000070436 | 2.049  | 3.366  | 28.745 | 0.000   | 0.000 | Serpinh1             | MGI:88283   | Serpinh1      | serine (or cysteine) peptidase inhibitor, clade H, member 1   |
| ENSMUSG00000070476 | -3.940 | 0.831  | 9.740  | 0.002   | 0.032 | 9030418K01Rik        | MGI:1918782 | 9030418K01Rik | RIKEN cDNA 9030418K01 gene                                    |
| ENSMUSG00000070889 | 1.452  | 6.147  | 33.791 | 0.000   | 0.000 |                      |             |               |                                                               |
| ENSMUSG00000071076 | 0.691  | 5.279  | 9.940  | 0.002   | 0.029 | Jund                 | MGI:96648   | Jund          | Jun proto-oncogene related gene d                             |
| ENSMUSG00000071356 | 5.011  | 4.642  | 20.027 | 0.000   | 0.000 | Reg3b                | MGI:97478   | Reg3b         | regenerating islet-derived 3 beta                             |
| ENSMUSG00000071711 | -0.805 | 6.088  | 15.607 | 0.000   | 0.002 | Mpst                 | MGI:2179733 | Mpst          | mercaptopyruvate sulfurtransferase                            |
| ENSMUSG00000072244 | 2.892  | 1.915  | 20.502 | 0.000   | 0.000 | Trim6                | MGI:2137352 | Trim6         | tripartite motif-containing 6                                 |
| ENSMUSG00000072571 | 1.121  | 3.474  | 9.356  | 0.002   | 0.037 | G630016D24Rik        | MGI:3588246 | G630016D24Rik | RIKEN cDNA G630016D24 gene                                    |
| ENSMUSG00000072941 | 4.214  | 1.376  | 22.886 | 0.000   | 0.000 | Sod3                 | MGI:103181  | Sod3          | superoxide dismutase 3, extracellular                         |
| ENSMUSG00000073043 | -1.376 | 3.228  | 12.535 | 0.000   | 0.009 | Atoh1                | MGI:104654  | Atoh1         | atonal homolog 1 (Drosophila)                                 |
| ENSMUSG00000073608 | -2.345 | 5.198  | 98.796 | 0.000   | 0.000 | Gm6086               | MGI:3646771 | Gm6086        | predicted gene 6086                                           |
| ENSMUSG00000073678 | 1.307  | 5.529  | 36.401 | 0.000   | 0.000 | Pgap1                | MGI:2443342 | Pgap1         | post-GPI attachment to proteins 1                             |
| ENSMUSG00000073702 | -1.799 | 3.583  | 11.132 | 0.001   | 0.017 | Rpl31                | MGI:2149632 | Rpl31         | ribosomal protein L31                                         |
| ENSMUSG00000073987 | 1.234  | 4.365  | 17.584 | 0.000   | 0.001 | Ggh                  | MGI:1329035 | Ggh           | gamma-glutamyl hydrolase                                      |
| ENSMUSG00000074115 | -1.591 | 5.458  | 38.222 | 0.000   | 0.000 | Saa1                 | MGI:98221   | Saa1          | serum amyloid A 1                                             |
| ENSMUSG00000074151 | -2.118 | 1.657  | 9.235  | 0.002   | 0.039 | Nlrc5                | MGI:3612191 | Nlrc5         | NLR family, CARD domain containing 5                          |
| ENSMUSG00000074181 | 3.630  | 0.921  | 9.274  | 0.002   | 0.038 |                      |             |               |                                                               |
| ENSMUSG00000074183 | 3.136  | 1.904  | 16.528 | 0.000   | 0.002 | Gsta1                | MGI:1095417 | Gsta1         | glutathione S-transferase, alpha 1 (Ya)                       |
| ENSMUSG00000074195 | 3.213  | 6.061  | 18.725 | 0.000   | 0.001 | A1747448             | MGI:2139790 | A1747448      | expressed sequence A1747448                                   |
| ENSMUSG00000074457 | 1.156  | 5.987  | 23.851 | 0.000   | 0.000 | S100a16              | MGI:1915110 | S100a16       | S100 calcium binding protein A16                              |
| ENSMUSG00000074796 | 3.217  | 4.662  | 45.040 | 0.000   | 0.000 | Slc4a11              | MGI:2138987 | Slc4a11       | solute carrier family 4, sodium bicarbonate transporter-like, |

Table S1

| Genes              | logFC  | logCPM | LR     | P-value | FDR   | Associated gene name | MGI ID      | MGI symbol    | MGI description                                                               |
|--------------------|--------|--------|--------|---------|-------|----------------------|-------------|---------------|-------------------------------------------------------------------------------|
| ENSMUSG00000074892 | -0.745 | 8.122  | 8.939  | 0.003   | 0.044 | B3galt5              | MGI:2136878 | B3galt5       | member 11<br>UDP-Gal:betaGlcNAc beta 1,3-galactosyltransferase, polypeptide 5 |
| ENSMUSG00000075602 | 1.248  | 6.756  | 26.541 | 0.000   | 0.000 | Ly6a                 | MGI:107527  | Ly6a          | lymphocyte antigen 6 complex, locus A                                         |
| ENSMUSG00000075611 | 1.326  | 4.497  | 23.801 | 0.000   | 0.000 | Gm11545              | MGI:2144683 | Gm11545       | predicted gene 11545                                                          |
| ENSMUSG00000076609 | -1.489 | 2.915  | 9.808  | 0.002   | 0.031 | Igkc                 | MGI:96495   | Igkc          | immunoglobulin kappa constant                                                 |
| ENSMUSG00000076613 | -3.949 | 0.928  | 10.321 | 0.001   | 0.025 | Ighg                 | MGI:2144967 | Ighg          | immunoglobulin heavy chain (gamma polypeptide)                                |
| ENSMUSG00000076617 | -3.819 | 0.414  | 8.833  | 0.003   | 0.046 | Ighm                 | MGI:96448   | Ighm          | immunoglobulin heavy constant mu                                              |
| ENSMUSG00000078439 | -0.964 | 4.221  | 11.101 | 0.001   | 0.017 | 2210404O07Rik        | MGI:1919523 | 2210404O07Rik | RIKEN cDNA 2210404O07 gene                                                    |
| ENSMUSG00000078566 | 0.973  | 5.082  | 14.715 | 0.000   | 0.003 | Bnip3                | MGI:109326  | Bnip3         | BCL2/adenovirus E1B interacting protein 3                                     |
| ENSMUSG00000078853 | -1.438 | 3.680  | 11.248 | 0.001   | 0.016 | Igtp                 | MGI:107729  | Igtp          | interferon gamma induced GTPase                                               |
| ENSMUSG00000078920 | -1.988 | 4.243  | 36.523 | 0.000   | 0.000 | Ifi47                | MGI:99448   | Ifi47         | interferon gamma inducible protein 47                                         |
| ENSMUSG00000079037 | -1.375 | 3.643  | 12.053 | 0.001   | 0.011 | Prnp                 | MGI:97769   | Prnp          | prion protein                                                                 |
| ENSMUSG00000079092 | 4.398  | 2.578  | 52.054 | 0.000   | 0.000 | Prl2c2               | MGI:97618   | Prl2c2        | prolactin family 2, subfamily c, member 2                                     |
| ENSMUSG00000079174 | -1.164 | 7.519  | 30.514 | 0.000   | 0.000 | Gm3054               | MGI:3781232 | Gm3054        | predicted gene 3054                                                           |
| ENSMUSG00000079507 | -1.359 | 3.021  | 9.689  | 0.002   | 0.032 | H2-Q1                | MGI:95928   | H2-Q1         | histocompatibility 2, Q region locus 1                                        |
| ENSMUSG00000079620 | -0.673 | 7.026  | 9.592  | 0.002   | 0.034 | Muc4                 | MGI:2153525 | Muc4          | mucin 4                                                                       |
| ENSMUSG00000081488 | -3.760 | 1.701  | 18.027 | 0.000   | 0.001 | Gm15368              | MGI:3707462 | Gm15368       | predicted gene 15368                                                          |
| ENSMUSG00000082513 | -2.339 | 1.720  | 10.880 | 0.001   | 0.019 | Gm15374              | MGI:3707463 | Gm15374       | predicted gene 15374                                                          |
| ENSMUSG00000082956 | -0.932 | 4.987  | 15.380 | 0.000   | 0.003 | Naip3                | MGI:1298225 | Naip3         | NLR family, apoptosis inhibitory protein 3                                    |
| ENSMUSG00000085399 | -2.791 | 2.410  | 18.872 | 0.000   | 0.001 | 9130206I24Rik        | MGI:2444065 | 9130206I24Rik | RIKEN cDNA 9130206I24 gene                                                    |
| ENSMUSG00000085607 | 1.264  | 5.856  | 32.463 | 0.000   | 0.000 |                      |             |               |                                                                               |
| ENSMUSG00000085930 | -1.689 | 2.323  | 10.772 | 0.001   | 0.020 |                      |             |               |                                                                               |
| ENSMUSG00000086320 | 1.080  | 4.959  | 21.320 | 0.000   | 0.000 | Gm12840              | MGI:3650917 | Gm12840       | predicted gene 12840                                                          |
| ENSMUSG00000086389 | -2.054 | 2.427  | 13.341 | 0.000   | 0.007 | Gm15998              | MGI:3802094 | Gm15998       | predicted gene 15998                                                          |
| ENSMUSG00000086825 | 1.701  | 2.330  | 11.090 | 0.001   | 0.017 | Gm15675              | MGI:3783117 | Gm15675       | predicted gene 15675                                                          |
| ENSMUSG00000088025 | 0.970  | 6.686  | 8.765  | 0.003   | 0.048 | RNaseP_nuc           |             |               |                                                                               |
| ENSMUSG00000089789 | -2.111 | 2.328  | 8.776  | 0.003   | 0.048 | Rdh1                 | MGI:1195275 | Rdh1          | retinol dehydrogenase 1 (all trans)                                           |
| ENSMUSG00000090124 | -0.738 | 6.300  | 11.674 | 0.001   | 0.013 | Ugt1a7c              | MGI:3032636 | Ugt1a7c       | UDP glucuronosyltransferase 1 family, polypeptide A7C                         |
| ENSMUSG00000090186 | 2.973  | 1.344  | 8.702  | 0.003   | 0.049 | Gm7592               | MGI:3644077 | Gm7592        | predicted gene 7592                                                           |
| ENSMUSG00000090311 | -1.175 | 3.303  | 9.308  | 0.002   | 0.038 |                      |             |               |                                                                               |
| ENSMUSG00000090600 | 1.941  | 4.549  | 26.367 | 0.000   | 0.000 |                      |             |               |                                                                               |



Table S1

| Genes              | logFC  | logCPM | LR     | P-value | FDR   | Associated gene name | MGI ID      | MGI symbol    | MGI description                                                                          |
|--------------------|--------|--------|--------|---------|-------|----------------------|-------------|---------------|------------------------------------------------------------------------------------------|
| ENSMUSG00000091021 | -2.178 | 2.711  | 10.022 | 0.002   | 0.028 | Gm17300              | MGI:4936934 | Gm17300       | predicted gene, 17300                                                                    |
| ENSMUSG00000091387 | 2.002  | 2.725  | 20.142 | 0.000   | 0.000 | Gcnt4                | MGI:2684919 | Gcnt4         | glucosaminyl (N-acetyl) transferase 4, core 2 (beta-1,6-N-acetylglucosaminyltransferase) |
| ENSMUSG00000091474 | 1.224  | 3.995  | 11.903 | 0.001   | 0.012 | 2610021A01Rik        | MGI:1922662 | 2610021A01Rik | RIKEN cDNA 2610021A01 gene                                                               |
| ENSMUSG00000091705 | -1.281 | 6.221  | 32.671 | 0.000   | 0.000 | H2-Q2                | MGI:95931   | H2-Q2         | histocompatibility 2, Q region locus 2                                                   |
| ENSMUSG00000091838 | 3.187  | 0.823  | 9.157  | 0.002   | 0.040 |                      |             |               |                                                                                          |
| ENSMUSG00000092475 | -2.835 | 2.001  | 15.585 | 0.000   | 0.002 | 9930038K12Rik        | MGI:2443211 | 9930038K12Rik | RIKEN cDNA 9930038K12 gene                                                               |
| ENSMUSG00000092773 | -0.973 | 6.296  | 11.356 | 0.001   | 0.016 | AC157822.1           |             |               |                                                                                          |
