# Supplementary material for: Interplay of host microbiota, genetic perturbations, and inflammation promotes local development of intestinal neoplasms in mice
Source: PubMed Central journal article supplement — J Exp Med. 2014 Mar 10;211(3):457–72. doi: 10.1084/jem.20131587 (PMC3949565; doi:10.1084/jem.20131587), 2014-03-10
Supplement: supp_jem.20131587_JEM_20131587_TableS2.pdf [file supp_jem.20131587_JEM_20131587_TableS2.pdf]

**Table S2.** ClueGO analysis of the RNA-Seq analysis in tissue isolated from *HBUS* polyps compared with unaffected proximal cecum

| GO ID      | GO term                                        | GO groups                  | Number of genes | % associated genes | Term p-value | Term p-value corrected with Benjamini and Hochberg |
|------------|------------------------------------------------|----------------------------|-----------------|--------------------|--------------|----------------------------------------------------|
| GO:0000165 | MAPK cascade                                   | [Group15]                  | 35              | 6.836              | 0.000        | 0.000                                              |
| GO:0000902 | cell morphogenesis                             | [Group31]                  | 53              | 6.280              | 0.000        | 0.000                                              |
| GO:0000904 | cell morphogenesis involved in differentiation | [Group31]                  | 40              | 7.299              | 0.000        | 0.000                                              |
| GO:0001501 | skeletal system development                    | [None]                     | 33              | 8.505              | 0.000        | 0.000                                              |
| GO:0001503 | ossification                                   | [None]                     | 31              | 10.438             | 0.000        | 0.000                                              |
| GO:0001525 | angiogenesis                                   | [Group5]                   | 50              | 13.369             | 0.000        | 0.000                                              |
| GO:0001568 | blood vessel development                       | [Group35, Group5]          | 63              | 11.864             | 0.000        | 0.000                                              |
| GO:0001654 | eye development                                | [Group16]                  | 25              | 7.962              | 0.000        | 0.000                                              |
| GO:0001655 | urogenital system development                  | [None]                     | 26              | 8.307              | 0.000        | 0.000                                              |
| GO:0001775 | cell activation                                | [Group30]                  | 35              | 5.401              | 0.000        | 0.001                                              |
| GO:0001816 | cytokine production                            | [Group0, Group30]          | 28              | 6.437              | 0.000        | 0.000                                              |
| GO:0001932 | regulation of protein phosphorylation          | [Group15]                  | 42              | 5.924              | 0.000        | 0.000                                              |
| GO:0001944 | vasculature development                        | [Group20, Group35, Group5] | 66              | 11.828             | 0.000        | 0.000                                              |
| GO:0002009 | morphogenesis of an epithelium                 | [Group18, Group34]         | 31              | 7.243              | 0.000        | 0.000                                              |
| GO:0002237 | response to molecule of bacterial origin       | [Group21, Group37]         | 28              | 11.155             | 0.000        | 0.000                                              |
| GO:0002520 | immune system development                      | [Group2]                   | 31              | 4.704              | 0.006        | 0.008                                              |
| GO:0002682 | regulation of immune system process            | [Group30]                  | 48              | 6.358              | 0.000        | 0.000                                              |
| GO:0002684 | positive regulation of immune system process   | [Group0, Group30, Group4]  | 31              | 6.568              | 0.000        | 0.000                                              |
| GO:0003006 | developmental process involved in reproduction | [Group17]                  | 30              | 6.508              | 0.000        | 0.000                                              |
| GO:0005975 | carbohydrate metabolic process                 | [Group13]                  | 32              | 4.969              | 0.003        | 0.003                                              |
| GO:0006082 | organic acid metabolic process                 | [Group12]                  | 54              | 6.767              | 0.000        | 0.000                                              |
| GO:0006464 | cellular protein                               | [Group1, Group15]          | 100             | 4.505              | 0.000        | 0.000                                              |

Table S2

| GO ID      | GO term                                                          | GO groups                                    | Number of genes | % associated genes | Term p-value | Term p-value corrected with Benjamini and Hochberg |
|------------|------------------------------------------------------------------|----------------------------------------------|-----------------|--------------------|--------------|----------------------------------------------------|
|            | modification process                                             |                                              |                 |                    |              |                                                    |
| GO:0006468 | protein phosphorylation                                          | [Group15]                                    | 50              | 5.061              | 0.000        | 0.000                                              |
| GO:0006508 | proteolysis                                                      | [None]                                       | 48              | 4.762              | 0.001        | 0.001                                              |
| GO:0006629 | lipid metabolic process                                          | [Group12]                                    | 66              | 6.647              | 0.000        | 0.000                                              |
| GO:0006793 | phosphorus metabolic process                                     | [Group15]                                    | 89              | 4.190              | 0.000        | 0.001                                              |
| GO:0006796 | phosphate-containing compound metabolic process                  | [Group15]                                    | 85              | 4.089              | 0.001        | 0.002                                              |
| GO:0006810 | transport                                                        | [Group14, Group28]                           | 124             | 4.193              | 0.000        | 0.000                                              |
| GO:0006811 | ion transport                                                    | [Group14, Group28]                           | 49              | 5.506              | 0.000        | 0.000                                              |
| GO:0006812 | cation transport                                                 | [Group28]                                    | 27              | 4.397              | 0.022        | 0.028                                              |
| GO:0006873 | cellular ion homeostasis                                         | [Group10]                                    | 37              | 5.958              | 0.000        | 0.000                                              |
| GO:0006915 | apoptotic process                                                | [Group11]                                    | 85              | 6.102              | 0.000        | 0.000                                              |
| GO:0006928 | cellular component movement                                      | [Group6]                                     | 86              | 7.956              | 0.000        | 0.000                                              |
| GO:0006950 | response to stress                                               | [Group29, Group33]                           | 154             | 6.247              | 0.000        | 0.000                                              |
| GO:0006952 | defense response                                                 | [Group21, Group29, Group30, Group33, Group4] | 68              | 7.320              | 0.000        | 0.000                                              |
| GO:0006954 | inflammatory response                                            | [Group29, Group33, Group4]                   | 40              | 8.969              | 0.000        | 0.000                                              |
| GO:0006955 | immune response                                                  | [Group29, Group30]                           | 55              | 6.748              | 0.000        | 0.000                                              |
| GO:0006979 | response to oxidative stress                                     | [None]                                       | 29              | 11.197             | 0.000        | 0.000                                              |
| GO:0007010 | cytoskeleton organization                                        | [None]                                       | 34              | 4.282              | 0.017        | 0.022                                              |
| GO:0007154 | cell communication                                               | [Group15]                                    | 184             | 3.767              | 0.000        | 0.000                                              |
| GO:0007155 | cell adhesion                                                    | [Group3]                                     | 81              | 9.310              | 0.000        | 0.000                                              |
| GO:0007165 | signal transduction                                              | [Group15]                                    | 168             | 3.859              | 0.000        | 0.000                                              |
| GO:0007166 | cell surface receptor signaling pathway                          | [Group15, Group25]                           | 106             | 3.747              | 0.005        | 0.007                                              |
| GO:0007167 | enzyme linked receptor protein signaling pathway                 | [Group15, Group25]                           | 47              | 7.860              | 0.000        | 0.000                                              |
| GO:0007169 | transmembrane receptor protein tyrosine kinase signaling pathway | [Group25]                                    | 33              | 8.824              | 0.000        | 0.000                                              |
| GO:0007243 | intracellular protein kinase cascade                             | [Group15]                                    | 52              | 6.089              | 0.000        | 0.000                                              |

Table S2

| GO ID      | GO term                                   | GO groups                                    | Number of genes | % associated genes | Term p-value | Term p-value corrected with Benjamini and Hochberg |
|------------|-------------------------------------------|----------------------------------------------|-----------------|--------------------|--------------|----------------------------------------------------|
| GO:0007267 | cell-cell signaling                       | [Group7]                                     | 36              | 5.021              | 0.001        | 0.002                                              |
| GO:0007275 | multicellular organismal development      | [Group35]                                    | 215             | 5.492              | 0.000        | 0.000                                              |
| GO:0007399 | nervous system development                | [Group31, Group35]                           | 80              | 5.016              | 0.000        | 0.000                                              |
| GO:0007417 | central nervous system development        | [Group31]                                    | 40              | 5.495              | 0.000        | 0.000                                              |
| GO:0007420 | brain development                         | [Group31]                                    | 35              | 6.206              | 0.000        | 0.000                                              |
| GO:0007423 | sensory organ development                 | [Group16, Group34]                           | 36              | 7.214              | 0.000        | 0.000                                              |
| GO:0007507 | heart development                         | [Group23, Group32, Group5]                   | 30              | 6.897              | 0.000        | 0.000                                              |
| GO:0007517 | muscle organ development                  | [Group23]                                    | 34              | 9.043              | 0.000        | 0.000                                              |
| GO:0008219 | cell death                                | [Group11]                                    | 87              | 5.859              | 0.000        | 0.000                                              |
| GO:0008283 | cell proliferation                        | [Group9]                                     | 84              | 6.105              | 0.000        | 0.000                                              |
| GO:0008284 | positive regulation of cell proliferation | [Group15, Group9]                            | 46              | 7.256              | 0.000        | 0.000                                              |
| GO:0008285 | negative regulation of cell proliferation | [Group9]                                     | 29              | 6.105              | 0.000        | 0.000                                              |
| GO:0008610 | lipid biosynthetic process                | [Group12]                                    | 31              | 6.499              | 0.000        | 0.000                                              |
| GO:0009056 | catabolic process                         | [Group27]                                    | 78              | 4.827              | 0.000        | 0.000                                              |
| GO:0009058 | biosynthetic process                      | [Group1, Group15]                            | 173             | 3.591              | 0.002        | 0.003                                              |
| GO:0009605 | response to external stimulus             | [Group4]                                     | 70              | 6.487              | 0.000        | 0.000                                              |
| GO:0009611 | response to wounding                      | [Group29, Group33, Group8]                   | 77              | 10.322             | 0.000        | 0.000                                              |
| GO:0009617 | response to bacterium                     | [Group21]                                    | 36              | 8.491              | 0.000        | 0.000                                              |
| GO:0009628 | response to abiotic stimulus              | [Group24]                                    | 50              | 6.477              | 0.000        | 0.000                                              |
| GO:0009653 | anatomical structure morphogenesis        | [Group20, Group31, Group34, Group35, Group5] | 136             | 6.557              | 0.000        | 0.000                                              |
| GO:0009719 | response to endogenous stimulus           | [Group37]                                    | 85              | 8.449              | 0.000        | 0.000                                              |
| GO:0009725 | response to hormone stimulus              | [Group37]                                    | 53              | 8.775              | 0.000        | 0.000                                              |
| GO:0009790 | embryo development                        | [Group16, Group34, Group5]                   | 54              | 5.238              | 0.000        | 0.000                                              |
| GO:0009792 | embryo development                        | [Group16]                                    | 28              | 4.361              | 0.022        | 0.028                                              |

Table S2

| GO ID      | GO term                                                | GO groups                            | Number of genes | % associated genes | Term p-value | Term p-value corrected with Benjamini and Hochberg |
|------------|--------------------------------------------------------|--------------------------------------|-----------------|--------------------|--------------|----------------------------------------------------|
|            | ending in birth or egg hatching                        |                                      |                 |                    |              |                                                    |
| GO:0009887 | organ morphogenesis                                    | [Group16, Group18, Group34, Group35] | 55              | 6.351              | 0.000        | 0.000                                              |
| GO:0009888 | tissue development                                     | [Group18, Group34, Group35]          | 105             | 7.028              | 0.000        | 0.000                                              |
| GO:0009892 | negative regulation of metabolic process               | [Group15]                            | 55              | 3.798              | 0.030        | 0.037                                              |
| GO:0009893 | positive regulation of metabolic process               | [Group15]                            | 76              | 3.981              | 0.004        | 0.006                                              |
| GO:0009894 | regulation of catabolic process                        | [Group27]                            | 26              | 5.190              | 0.003        | 0.004                                              |
| GO:0009966 | regulation of signal transduction                      | [Group15]                            | 93              | 5.360              | 0.000        | 0.000                                              |
| GO:0009967 | positive regulation of signal transduction             | [Group15]                            | 51              | 6.100              | 0.000        | 0.000                                              |
| GO:0009968 | negative regulation of signal transduction             | [Group15]                            | 39              | 6.122              | 0.000        | 0.000                                              |
| GO:0009991 | response to extracellular stimulus                     | [None]                               | 25              | 7.716              | 0.000        | 0.000                                              |
| GO:0010033 | response to organic substance                          | [Group37]                            | 141             | 7.825              | 0.000        | 0.000                                              |
| GO:0010035 | response to inorganic substance                        | [Group36]                            | 45              | 13.761             | 0.000        | 0.000                                              |
| GO:0010038 | response to metal ion                                  | [Group36]                            | 32              | 14.159             | 0.000        | 0.000                                              |
| GO:0010243 | response to organonitrogen compound                    | [Group37]                            | 50              | 9.074              | 0.000        | 0.000                                              |
| GO:0010604 | positive regulation of macromolecule metabolic process | [Group15, Group9]                    | 66              | 3.754              | 0.024        | 0.030                                              |
| GO:0010605 | negative regulation of macromolecule metabolic process | [Group15]                            | 53              | 3.906              | 0.021        | 0.026                                              |
| GO:0010627 | regulation of intracellular protein kinase cascade     | [Group15]                            | 46              | 6.581              | 0.000        | 0.000                                              |
| GO:0010646 | regulation of cell communication                       | [Group15]                            | 102             | 5.157              | 0.000        | 0.000                                              |
| GO:0010647 | positive regulation of cell communication              | [Group15]                            | 54              | 6.102              | 0.000        | 0.000                                              |
| GO:0010648 | negative regulation of                                 | [Group15]                            | 42              | 6.241              | 0.000        | 0.000                                              |

Table S2

| GO ID      | GO term                                                                           | GO groups                   | Number of genes | % associated genes | Term p-value | Term p-value corrected with Benjamini and Hochberg |
|------------|-----------------------------------------------------------------------------------|-----------------------------|-----------------|--------------------|--------------|----------------------------------------------------|
| GO:0010740 | cell communication<br>positive regulation of intracellular protein kinase cascade | [Group15]                   | 33              | 6.875              | 0.000        | 0.000                                              |
| GO:0010817 | regulation of hormone levels                                                      | [None]                      | 28              | 7.778              | 0.000        | 0.000                                              |
| GO:0010941 | regulation of cell death                                                          | [Group11]                   | 72              | 6.463              | 0.000        | 0.000                                              |
| GO:0010942 | positive regulation of cell death                                                 | [Group11]                   | 37              | 8.605              | 0.000        | 0.000                                              |
| GO:0014070 | response to organic cyclic compound                                               | [Group37]                   | 59              | 9.768              | 0.000        | 0.000                                              |
| GO:0016043 | cellular component organization                                                   | [None]                      | 185             | 4.954              | 0.000        | 0.000                                              |
| GO:0016310 | phosphorylation                                                                   | [Group15]                   | 53              | 4.840              | 0.000        | 0.000                                              |
| GO:0016337 | cell-cell adhesion                                                                | [None]                      | 25              | 6.527              | 0.000        | 0.000                                              |
| GO:0016477 | cell migration                                                                    | [Group6]                    | 81              | 10.037             | 0.000        | 0.000                                              |
| GO:0018193 | peptidyl-amino acid modification                                                  | [None]                      | 34              | 5.893              | 0.000        | 0.000                                              |
| GO:0019222 | regulation of metabolic process                                                   | [Group1, Group15]           | 155             | 3.404              | 0.026        | 0.031                                              |
| GO:0019538 | protein metabolic process                                                         | [Group1, Group15]           | 164             | 4.432              | 0.000        | 0.000                                              |
| GO:0019725 | cellular homeostasis                                                              | [Group10]                   | 46              | 5.890              | 0.000        | 0.000                                              |
| GO:0019752 | carboxylic acid metabolic process                                                 | [Group12]                   | 49              | 6.676              | 0.000        | 0.000                                              |
| GO:0022008 | neurogenesis                                                                      | [Group31, Group35]          | 64              | 5.839              | 0.000        | 0.000                                              |
| GO:0022414 | reproductive process                                                              | [Group17]                   | 66              | 5.259              | 0.000        | 0.000                                              |
| GO:0022603 | regulation of anatomical structure morphogenesis                                  | [Group20]                   | 48              | 7.453              | 0.000        | 0.000                                              |
| GO:0022607 | cellular component assembly                                                       | [Group26]                   | 76              | 5.181              | 0.000        | 0.000                                              |
| GO:0023051 | regulation of signaling                                                           | [Group15]                   | 103             | 5.226              | 0.000        | 0.000                                              |
| GO:0023056 | positive regulation of signaling                                                  | [Group15]                   | 55              | 6.222              | 0.000        | 0.000                                              |
| GO:0023057 | negative regulation of signaling                                                  | [Group15]                   | 42              | 6.278              | 0.000        | 0.000                                              |
| GO:0030030 | cell projection organization                                                      | [Group31]                   | 49              | 5.833              | 0.000        | 0.000                                              |
| GO:0030097 | hemopoiesis                                                                       | [Group2]                    | 28              | 4.770              | 0.008        | 0.010                                              |
| GO:0030154 | cell differentiation                                                              | [Group20, Group31, Group35] | 152             | 5.477              | 0.000        | 0.000                                              |

Table S2

| GO ID      | GO term                                                   | GO groups                  | Number of genes | % associated genes | Term p-value | Term p-value corrected with Benjamini and Hochberg |
|------------|-----------------------------------------------------------|----------------------------|-----------------|--------------------|--------------|----------------------------------------------------|
| GO:0030155 | regulation of cell adhesion                               | [Group3]                   | 31              | 11.877             | 0.000        | 0.000                                              |
| GO:0030182 | neuron differentiation                                    | [Group22, Group31]         | 50              | 5.464              | 0.000        | 0.000                                              |
| GO:0030198 | extracellular matrix organization                         | [None]                     | 28              | 16.766             | 0.000        | 0.000                                              |
| GO:0030334 | regulation of cell migration                              | [Group6]                   | 58              | 14.078             | 0.000        | 0.000                                              |
| GO:0030335 | positive regulation of cell migration                     | [Group6]                   | 36              | 15.126             | 0.000        | 0.000                                              |
| GO:0030855 | epithelial cell differentiation                           | [Group18]                  | 38              | 7.024              | 0.000        | 0.000                                              |
| GO:0031175 | neuron projection development                             | [Group31]                  | 35              | 6.206              | 0.000        | 0.000                                              |
| GO:0031324 | negative regulation of cellular metabolic process         | [Group15]                  | 50              | 3.782              | 0.040        | 0.048                                              |
| GO:0031325 | positive regulation of cellular metabolic process         | [Group15]                  | 68              | 3.797              | 0.018        | 0.023                                              |
| GO:0031347 | regulation of defense response                            | [Group29, Group30, Group4] | 25              | 7.813              | 0.000        | 0.000                                              |
| GO:0031399 | regulation of protein modification process                | [Group15]                  | 47              | 5.353              | 0.000        | 0.000                                              |
| GO:0031589 | cell-substrate adhesion                                   | [Group3]                   | 31              | 15.500             | 0.000        | 0.000                                              |
| GO:0032101 | regulation of response to external stimulus               | [Group4]                   | 30              | 7.833              | 0.000        | 0.000                                              |
| GO:0032268 | regulation of cellular protein metabolic process          | [Group15]                  | 56              | 4.934              | 0.000        | 0.000                                              |
| GO:0032270 | positive regulation of cellular protein metabolic process | [Group15]                  | 33              | 5.069              | 0.002        | 0.002                                              |
| GO:0032496 | response to lipopolysaccharide                            | [Group21, Group37]         | 25              | 10.638             | 0.000        | 0.000                                              |
| GO:0032504 | multicellular organism reproduction                       | [Group17]                  | 36              | 4.472              | 0.008        | 0.010                                              |
| GO:0032787 | monocarboxylic acid metabolic process                     | [Group12]                  | 28              | 7.198              | 0.000        | 0.000                                              |
| GO:0032879 | regulation of localization                                | [Group14, Group6]          | 95              | 6.899              | 0.000        | 0.000                                              |
| GO:0032940 | secretion by cell                                         | [Group14]                  | 27              | 4.478              | 0.018        | 0.023                                              |
| GO:0032989 | cellular component                                        | [Group31, Group35]         | 60              | 6.438              | 0.000        | 0.000                                              |

Table S2

| GO ID      | GO term                                     | GO groups          | Number of genes | % associated genes | Term p-value | Term p-value corrected with Benjamini and Hochberg |
|------------|---------------------------------------------|--------------------|-----------------|--------------------|--------------|----------------------------------------------------|
| GO:0033036 | morphogenesis<br>macromolecule localization | [Group14]          | 68              | 3.972              | 0.007        | 0.009                                              |
| GO:0033554 | cellular response to stress                 | [None]             | 44              | 4.026              | 0.021        | 0.026                                              |
| GO:0033993 | response to lipid                           | [Group21, Group37] | 62              | 10.248             | 0.000        | 0.000                                              |
| GO:0034097 | response to cytokine stimulus               | [None]             | 35              | 8.883              | 0.000        | 0.000                                              |
| GO:0035239 | tube morphogenesis                          | [Group18]          | 27              | 7.826              | 0.000        | 0.000                                              |
| GO:0035295 | tube development                            | [Group18]          | 36              | 7.258              | 0.000        | 0.000                                              |
| GO:0035556 | intracellular signal transduction           | [Group15]          | 96              | 5.295              | 0.000        | 0.000                                              |
| GO:0035637 | multicellular organismal signaling          | [Group7]           | 26              | 4.586              | 0.015        | 0.020                                              |
| GO:0040008 | regulation of growth                        | [None]             | 29              | 5.631              | 0.001        | 0.001                                              |
| GO:0040012 | regulation of locomotion                    | [Group6]           | 59              | 12.661             | 0.000        | 0.000                                              |
| GO:0042060 | wound healing                               | [Group33, Group8]  | 42              | 15.498             | 0.000        | 0.000                                              |
| GO:0042127 | regulation of cell proliferation            | [Group9]           | 73              | 6.612              | 0.000        | 0.000                                              |
| GO:0042221 | response to chemical stimulus               | [Group37]          | 183             | 5.345              | 0.000        | 0.000                                              |
| GO:0042325 | regulation of phosphorylation               | [Group15]          | 46              | 5.982              | 0.000        | 0.000                                              |
| GO:0042327 | positive regulation of phosphorylation      | [Group15]          | 29              | 5.979              | 0.000        | 0.000                                              |
| GO:0042493 | response to drug                            | [None]             | 36              | 10.141             | 0.000        | 0.000                                              |
| GO:0042592 | homeostatic process                         | [Group10]          | 80              | 6.231              | 0.000        | 0.000                                              |
| GO:0042692 | muscle cell differentiation                 | [Group23]          | 29              | 8.056              | 0.000        | 0.000                                              |
| GO:0042981 | regulation of apoptotic process             | [Group11]          | 70              | 6.585              | 0.000        | 0.000                                              |
| GO:0043065 | positive regulation of apoptotic process    | [Group11]          | 35              | 8.495              | 0.000        | 0.000                                              |
| GO:0043066 | negative regulation of apoptotic process    | [Group11]          | 34              | 5.986              | 0.000        | 0.000                                              |
| GO:0043085 | positive regulation of catalytic activity   | [Group15]          | 35              | 5.287              | 0.001        | 0.001                                              |
| GO:0043170 | macromolecule metabolic process             | [Group1, Group15]  | 228             | 3.309              | 0.021        | 0.026                                              |
| GO:0043408 | regulation of MAPK cascade                  | [Group15]          | 31              | 6.843              | 0.000        | 0.000                                              |

Table S2

| GO ID      | GO term                                        | GO groups          | Number of genes | % associated genes | Term p-value | Term p-value corrected with Benjamini and Hochberg |
|------------|------------------------------------------------|--------------------|-----------------|--------------------|--------------|----------------------------------------------------|
| GO:0043549 | regulation of kinase activity                  | [Group15]          | 30              | 6.024              | 0.000        | 0.000                                              |
| GO:0043588 | skin development                               | [None]             | 26              | 9.701              | 0.000        | 0.000                                              |
| GO:0043933 | macromolecular complex subunit organization    | [Group26]          | 51              | 4.282              | 0.004        | 0.006                                              |
| GO:0044085 | cellular component biogenesis                  | [Group26]          | 78              | 4.812              | 0.000        | 0.000                                              |
| GO:0044093 | positive regulation of molecular function      | [Group15]          | 47              | 5.459              | 0.000        | 0.000                                              |
| GO:0044237 | cellular metabolic process                     | [Group1]           | 283             | 3.589              | 0.000        | 0.000                                              |
| GO:0044238 | primary metabolic process                      | [Group1]           | 292             | 3.583              | 0.000        | 0.000                                              |
| GO:0044248 | cellular catabolic process                     | [Group27]          | 56              | 4.201              | 0.004        | 0.006                                              |
| GO:0044249 | cellular biosynthetic process                  | [Group1, Group15]  | 159             | 3.403              | 0.024        | 0.030                                              |
| GO:0044255 | cellular lipid metabolic process               | [Group12]          | 42              | 6.096              | 0.000        | 0.000                                              |
| GO:0044267 | cellular protein metabolic process             | [Group1, Group15]  | 118             | 4.026              | 0.000        | 0.000                                              |
| GO:0044281 | small molecule metabolic process               | [Group12]          | 94              | 5.412              | 0.000        | 0.000                                              |
| GO:0044283 | small molecule biosynthetic process            | [Group12]          | 26              | 6.599              | 0.000        | 0.000                                              |
| GO:0044700 | single organism signaling                      | [Group15]          | 182             | 3.816              | 0.000        | 0.000                                              |
| GO:0044702 | single organism reproductive process           | [Group17]          | 42              | 4.773              | 0.001        | 0.002                                              |
| GO:0044707 | single-multicellular organism process          | [Group35]          | 265             | 4.418              | 0.000        | 0.000                                              |
| GO:0044710 | single-organism metabolic process              | [Group12]          | 140             | 5.707              | 0.000        | 0.000                                              |
| GO:0044723 | single-organism carbohydrate metabolic process | [Group13]          | 30              | 5.871              | 0.000        | 0.000                                              |
| GO:0044763 | single-organism cellular process               | [None]             | 369             | 3.812              | 0.000        | 0.000                                              |
| GO:0044765 | single-organism transport                      | [Group14, Group28] | 109             | 4.640              | 0.000        | 0.000                                              |
| GO:0044767 | single-organism                                | [Group35]          | 215             | 5.827              | 0.000        | 0.000                                              |



Table S2

| GO ID      | GO term                                                  | GO groups                   | Number of genes | % associated genes | Term p-value | Term p-value corrected with Benjamini and Hochberg |
|------------|----------------------------------------------------------|-----------------------------|-----------------|--------------------|--------------|----------------------------------------------------|
| GO:0045087 | developmental process<br>innate immune response          | [Group29, Group30]          | 25              | 7.289              | 0.000        | 0.000                                              |
| GO:0045321 | leukocyte activation                                     | [Group30]                   | 28              | 4.895              | 0.005        | 0.007                                              |
| GO:0045595 | regulation of cell differentiation                       | [Group20, Group22, Group35] | 70              | 6.428              | 0.000        | 0.000                                              |
| GO:0045597 | positive regulation of cell differentiation              | [Group20]                   | 40              | 7.692              | 0.000        | 0.000                                              |
| GO:0045859 | regulation of protein kinase activity                    | [Group15]                   | 27              | 5.782              | 0.001        | 0.001                                              |
| GO:0046903 | secretion                                                | [Group14]                   | 32              | 4.565              | 0.009        | 0.011                                              |
| GO:0048468 | cell development                                         | [Group31, Group35]          | 92              | 6.041              | 0.000        | 0.000                                              |
| GO:0048513 | organ development                                        | [Group35]                   | 155             | 5.966              | 0.000        | 0.000                                              |
| GO:0048514 | blood vessel morphogenesis                               | [Group35, Group5]           | 55              | 11.931             | 0.000        | 0.000                                              |
| GO:0048518 | positive regulation of biological process                | [Group15, Group20]          | 171             | 5.077              | 0.000        | 0.000                                              |
| GO:0048519 | negative regulation of biological process                | [Group15, Group20]          | 145             | 4.753              | 0.000        | 0.000                                              |
| GO:0048522 | positive regulation of cellular process                  | [Group15, Group20]          | 147             | 4.892              | 0.000        | 0.000                                              |
| GO:0048523 | negative regulation of cellular process                  | [Group15]                   | 127             | 4.591              | 0.000        | 0.000                                              |
| GO:0048545 | response to steroid hormone stimulus                     | [Group37]                   | 32              | 10.667             | 0.000        | 0.000                                              |
| GO:0048568 | embryonic organ development                              | [Group16]                   | 25              | 5.896              | 0.001        | 0.001                                              |
| GO:0048583 | regulation of response to stimulus                       | [Group15]                   | 115             | 5.201              | 0.000        | 0.000                                              |
| GO:0048584 | positive regulation of response to stimulus              | [Group15, Group4]           | 64              | 5.639              | 0.000        | 0.000                                              |
| GO:0048585 | negative regulation of response to stimulus              | [Group15]                   | 46              | 5.793              | 0.000        | 0.000                                              |
| GO:0048598 | embryonic morphogenesis                                  | [Group16, Group18]          | 31              | 5.626              | 0.000        | 0.001                                              |
| GO:0048609 | multicellular organismal reproductive process            | [Group17]                   | 33              | 4.161              | 0.027        | 0.032                                              |
| GO:0048646 | anatomical structure formation involved in morphogenesis | [Group16, Group35, Group5]  | 79              | 8.476              | 0.000        | 0.000                                              |
| GO:0048666 | neuron development                                       | [Group31]                   | 39              | 5.652              | 0.000        | 0.000                                              |

Table S2

| GO ID      | GO term                                                | GO groups                   | Number of genes | % associated genes | Term p-value | Term p-value corrected with Benjamini and Hochberg |
|------------|--------------------------------------------------------|-----------------------------|-----------------|--------------------|--------------|----------------------------------------------------|
| GO:0048699 | generation of neurons                                  | [Group22, Group31]          | 56              | 5.506              | 0.000        | 0.000                                              |
| GO:0048729 | tissue morphogenesis                                   | [Group18, Group34]          | 40              | 7.449              | 0.000        | 0.000                                              |
| GO:0048731 | system development                                     | [Group35]                   | 198             | 5.832              | 0.000        | 0.000                                              |
| GO:0048732 | gland development                                      | [Group18]                   | 27              | 9.000              | 0.000        | 0.000                                              |
| GO:0048812 | neuron projection morphogenesis                        | [Group31]                   | 26              | 6.341              | 0.000        | 0.000                                              |
| GO:0048856 | anatomical structure development                       | [Group35]                   | 225             | 5.679              | 0.000        | 0.000                                              |
| GO:0048858 | cell projection morphogenesis                          | [Group31]                   | 30              | 5.576              | 0.001        | 0.001                                              |
| GO:0048869 | cellular developmental process                         | [Group20, Group31, Group35] | 158             | 5.309              | 0.000        | 0.000                                              |
| GO:0048870 | cell motility                                          | [Group6]                    | 83              | 9.336              | 0.000        | 0.000                                              |
| GO:0048878 | chemical homeostasis                                   | [Group10]                   | 58              | 6.437              | 0.000        | 0.000                                              |
| GO:0050776 | regulation of immune response                          | [Group30, Group4]           | 25              | 6.313              | 0.000        | 0.000                                              |
| GO:0050789 | regulation of biological process                       | [Group15]                   | 293             | 3.444              | 0.000        | 0.001                                              |
| GO:0050790 | regulation of catalytic activity                       | [Group15]                   | 53              | 4.605              | 0.001        | 0.001                                              |
| GO:0050793 | regulation of developmental process                    | [Group15, Group20, Group35] | 108             | 7.004              | 0.000        | 0.000                                              |
| GO:0050794 | regulation of cellular process                         | [Group15]                   | 270             | 3.356              | 0.004        | 0.006                                              |
| GO:0050801 | ion homeostasis                                        | [Group10]                   | 43              | 6.117              | 0.000        | 0.000                                              |
| GO:0050878 | regulation of body fluid levels                        | [Group8]                    | 26              | 11.017             | 0.000        | 0.000                                              |
| GO:0051049 | regulation of transport                                | [Group14, Group6]           | 49              | 5.036              | 0.000        | 0.000                                              |
| GO:0051050 | positive regulation of transport                       | [Group14]                   | 29              | 5.847              | 0.000        | 0.000                                              |
| GO:0051093 | negative regulation of developmental process           | [None]                      | 37              | 6.379              | 0.000        | 0.000                                              |
| GO:0051094 | positive regulation of developmental process           | [Group20]                   | 59              | 8.082              | 0.000        | 0.000                                              |
| GO:0051128 | regulation of cellular component organization          | [Group19]                   | 66              | 5.148              | 0.000        | 0.000                                              |
| GO:0051130 | positive regulation of cellular component organization | [Group19]                   | 34              | 6.227              | 0.000        | 0.000                                              |
| GO:0051146 | striated muscle cell differentiation                   | [Group23]                   | 26              | 8.997              | 0.000        | 0.000                                              |

Table S2

| GO ID      | GO term                                                 | GO groups                   | Number of genes | % associated genes | Term p-value | Term p-value corrected with Benjamini and Hochberg |
|------------|---------------------------------------------------------|-----------------------------|-----------------|--------------------|--------------|----------------------------------------------------|
| GO:0051174 | regulation of phosphorus metabolic process              | [Group15]                   | 52              | 4.626              | 0.001        | 0.001                                              |
| GO:0051234 | establishment of localization                           | [Group14]                   | 126             | 4.175              | 0.000        | 0.000                                              |
| GO:0051239 | regulation of multicellular organismal process          | [Group15, Group20]          | 122             | 6.260              | 0.000        | 0.000                                              |
| GO:0051240 | positive regulation of multicellular organismal process | [Group0]                    | 44              | 7.971              | 0.000        | 0.000                                              |
| GO:0051241 | negative regulation of multicellular organismal process | [Group0]                    | 25              | 7.331              | 0.000        | 0.000                                              |
| GO:0051246 | regulation of protein metabolic process                 | [Group15]                   | 66              | 4.896              | 0.000        | 0.000                                              |
| GO:0051247 | positive regulation of protein metabolic process        | [Group15]                   | 36              | 4.871              | 0.002        | 0.003                                              |
| GO:0051248 | negative regulation of protein metabolic process        | [Group15]                   | 26              | 5.991              | 0.000        | 0.001                                              |
| GO:0051259 | protein oligomerization                                 | [Group26]                   | 27              | 7.895              | 0.000        | 0.000                                              |
| GO:0051270 | regulation of cellular component movement               | [Group6]                    | 60              | 12.552             | 0.000        | 0.000                                              |
| GO:0051641 | cellular localization                                   | [Group14, Group6]           | 65              | 3.687              | 0.035        | 0.042                                              |
| GO:0051649 | establishment of localization in cell                   | [Group14]                   | 58              | 3.811              | 0.025        | 0.031                                              |
| GO:0051707 | response to other organism                              | [Group21, Group29]          | 50              | 7.962              | 0.000        | 0.000                                              |
| GO:0051716 | cellular response to stimulus                           | [Group15, Group37]          | 212             | 4.024              | 0.000        | 0.000                                              |
| GO:0051960 | regulation of nervous system development                | [Group22, Group31]          | 27              | 5.455              | 0.001        | 0.002                                              |
| GO:0055080 | cation homeostasis                                      | [Group10]                   | 26              | 6.311              | 0.000        | 0.000                                              |
| GO:0055082 | cellular chemical homeostasis                           | [Group10]                   | 42              | 6.017              | 0.000        | 0.000                                              |
| GO:0060284 | regulation of cell development                          | [Group20, Group22, Group31] | 27              | 4.770              | 0.009        | 0.011                                              |
| GO:0060341 | regulation of cellular localization                     | [Group14, Group6]           | 36              | 5.255              | 0.001        | 0.001                                              |
| GO:0060429 | epithelium                                              | [Group18, Group35]          | 56              | 6.573              | 0.000        | 0.000                                              |

Table S2

| GO ID      | GO term                                     | GO groups                  | Number of genes | % associated genes | Term p-value | Term p-value corrected with Benjamini and Hochberg |
|------------|---------------------------------------------|----------------------------|-----------------|--------------------|--------------|----------------------------------------------------|
| GO:0060537 | development<br>muscle tissue development    | [Group23, Group32]         | 36              | 9.000              | 0.000        | 0.000                                              |
| GO:0060562 | epithelial tube morphogenesis               | [Group16, Group18]         | 25              | 7.692              | 0.000        | 0.000                                              |
| GO:0061061 | muscle structure development                | [Group23]                  | 45              | 8.824              | 0.000        | 0.000                                              |
| GO:0065003 | macromolecular complex assembly             | [Group26]                  | 41              | 4.209              | 0.013        | 0.017                                              |
| GO:0065008 | regulation of biological quality            | [Group10]                  | 153             | 6.623              | 0.000        | 0.000                                              |
| GO:0065009 | regulation of molecular function            | [Group15]                  | 72              | 4.678              | 0.000        | 0.000                                              |
| GO:0070482 | response to oxygen levels                   | [Group24]                  | 26              | 10.656             | 0.000        | 0.000                                              |
| GO:0070848 | response to growth factor stimulus          | [Group25, Group37]         | 34              | 9.632              | 0.000        | 0.000                                              |
| GO:0070887 | cellular response to chemical stimulus      | [Group15, Group37]         | 115             | 8.519              | 0.000        | 0.000                                              |
| GO:0071310 | cellular response to organic substance      | [Group37]                  | 92              | 8.526              | 0.000        | 0.000                                              |
| GO:0071363 | cellular response to growth factor stimulus | [Group25, Group37]         | 32              | 9.524              | 0.000        | 0.000                                              |
| GO:0071396 | cellular response to lipid                  | [Group21, Group37]         | 25              | 10.417             | 0.000        | 0.000                                              |
| GO:0071495 | cellular response to endogenous stimulus    | [Group25, Group37]         | 51              | 8.778              | 0.000        | 0.000                                              |
| GO:0071702 | organic substance transport                 | [Group14]                  | 71              | 4.181              | 0.002        | 0.002                                              |
| GO:0071704 | organic substance metabolic process         | [Group1]                   | 310             | 3.673              | 0.000        | 0.000                                              |
| GO:0071822 | protein complex subunit organization        | [Group26]                  | 49              | 5.094              | 0.000        | 0.000                                              |
| GO:0072358 | cardiovascular system development           | [Group32, Group35, Group5] | 78              | 9.466              | 0.000        | 0.000                                              |
| GO:0080134 | regulation of response to stress            | [Group15, Group29, Group4] | 40              | 6.144              | 0.000        | 0.000                                              |
| GO:1901135 | carbohydrate derivative metabolic process   | [None]                     | 44              | 4.147              | 0.013        | 0.017                                              |
| GO:1901564 | organonitrogen compound metabolic process   | [Group12]                  | 58              | 4.351              | 0.002        | 0.002                                              |

Table S2

| GO ID      | GO term                                            | GO groups          | Number of genes | % associated genes | Term p-value | Term p-value corrected with Benjamini and Hochberg |
|------------|----------------------------------------------------|--------------------|-----------------|--------------------|--------------|----------------------------------------------------|
| GO:1901575 | organic substance catabolic process                | [Group27]          | 64              | 4.414              | 0.001        | 0.001                                              |
| GO:1901576 | organic substance biosynthetic process             | [Group1, Group15]  | 166             | 3.501              | 0.007        | 0.010                                              |
| GO:1901615 | organic hydroxy compound metabolic process         | [None]             | 29              | 8.056              | 0.000        | 0.000                                              |
| GO:1901698 | response to nitrogen compound                      | [Group37]          | 52              | 8.739              | 0.000        | 0.000                                              |
| GO:1901699 | cellular response to nitrogen compound             | [Group37]          | 27              | 9.184              | 0.000        | 0.000                                              |
| GO:1901700 | response to oxygen-containing compound             | [Group37]          | 89              | 9.082              | 0.000        | 0.000                                              |
| GO:1901701 | cellular response to oxygen-containing compound    | [Group21, Group37] | 55              | 10.242             | 0.000        | 0.000                                              |
| GO:2000026 | regulation of multicellular organismal development | [Group20, Group5]  | 81              | 6.650              | 0.000        | 0.000                                              |
