# Supplementary material for: Interplay of host microbiota, genetic perturbations, and inflammation promotes local development of intestinal neoplasms in mice
Source: PubMed Central journal article supplement — J Exp Med. 2014 Mar 10;211(3):457–72. doi: 10.1084/jem.20131587 (PMC3949565; doi:10.1084/jem.20131587), 2014-03-10
Supplement: supp_jem.20131587_JEM_20131587_TableS3.pdf [file supp_jem.20131587_JEM_20131587_TableS3.pdf]

**Table S3.** Subsampled and filtered OTU table of Taconic moms, rederived *HBUS* mice, and *HBUS* and WT mice obtained through interbreeding with mice obtained from the Jackson Laboratory**Table S3 A.** Antibiotic-treated (A) *HBUS* mice

| ID      | A  | A.1 | A.2 | A.3 | A.4 | A.5 | A.6 | A.7 | A.8 | A.9 | A.10 |
|---------|----|-----|-----|-----|-----|-----|-----|-----|-----|-----|------|
| 181348  | 0  | 0   | 0   | 0   | 0   | 0   | 0   | 0   | 0   | 0   | 0    |
| 3957916 | 5  | 0   | 0   | 1   | 0   | 1   | 0   | 0   | 0   | 0   | 0    |
| 244484  | 0  | 0   | 0   | 0   | 2   | 0   | 0   | 0   | 0   | 0   | 0    |
| 1111328 | 0  | 0   | 0   | 0   | 0   | 0   | 0   | 0   | 0   | 0   | 0    |
| 197452  | 4  | 1   | 0   | 0   | 3   | 2   | 0   | 0   | 1   | 0   | 0    |
| 269815  | 0  | 0   | 0   | 0   | 0   | 0   | 0   | 0   | 0   | 0   | 0    |
| 363383  | 16 | 9   | 45  | 39  | 56  | 65  | 91  | 74  | 2   | 5   | 1    |
| 175080  | 0  | 0   | 0   | 0   | 0   | 0   | 0   | 0   | 0   | 0   | 0    |
| 179853  | 0  | 0   | 0   | 0   | 0   | 0   | 0   | 0   | 0   | 0   | 0    |
| 183089  | 1  | 1   | 0   | 4   | 1   | 1   | 0   | 0   | 0   | 0   | 0    |
| 263171  | 0  | 0   | 0   | 0   | 0   | 0   | 0   | 0   | 0   | 0   | 0    |
| 192222  | 0  | 0   | 0   | 0   | 0   | 0   | 0   | 0   | 0   | 0   | 0    |
| 276509  | 0  | 0   | 0   | 0   | 0   | 0   | 0   | 0   | 0   | 0   | 0    |
| 423455  | 0  | 0   | 0   | 0   | 1   | 0   | 1   | 2   | 1   | 2   | 0    |
| 267502  | 0  | 0   | 0   | 2   | 0   | 0   | 0   | 0   | 0   | 0   | 0    |
| 172163  | 0  | 0   | 0   | 0   | 0   | 0   | 0   | 0   | 0   | 0   | 0    |
| 828435  | 0  | 0   | 0   | 0   | 0   | 0   | 0   | 0   | 0   | 0   | 0    |
| 289306  | 0  | 0   | 0   | 0   | 0   | 0   | 0   | 0   | 0   | 0   | 0    |
| 290253  | 1  | 0   | 0   | 0   | 0   | 0   | 0   | 0   | 0   | 0   | 0    |
| 216495  | 0  | 0   | 0   | 0   | 0   | 0   | 0   | 0   | 0   | 0   | 0    |
| 4329450 | 0  | 0   | 0   | 0   | 0   | 0   | 0   | 0   | 0   | 0   | 0    |
| 271418  | 0  | 1   | 0   | 0   | 0   | 0   | 0   | 0   | 0   | 0   | 0    |
| 206817  | 0  | 0   | 0   | 0   | 0   | 0   | 0   | 0   | 0   | 0   | 0    |
| 197891  | 0  | 0   | 0   | 0   | 0   | 0   | 0   | 0   | 0   | 0   | 0    |
| 205134  | 0  | 1   | 0   | 0   | 1   | 1   | 1   | 0   | 1   | 3   | 1    |
| 4352747 | 0  | 0   | 0   | 0   | 0   | 0   | 0   | 0   | 0   | 0   | 0    |
| 182043  | 6  | 0   | 0   | 0   | 2   | 0   | 0   | 0   | 0   | 0   | 0    |
| 274297  | 0  | 0   | 0   | 0   | 1   | 0   | 0   | 0   | 0   | 0   | 1    |
| 197782  | 0  | 0   | 0   | 0   | 0   | 0   | 0   | 0   | 0   | 0   | 0    |
| 1105328 | 0  | 0   | 0   | 0   | 0   | 0   | 0   | 0   | 0   | 0   | 0    |
| 274438  | 0  | 0   | 0   | 0   | 0   | 0   | 0   | 0   | 0   | 0   | 0    |
| 191948  | 16 | 10  | 1   | 13  | 7   | 7   | 0   | 9   | 0   | 0   | 0    |
| 429917  | 0  | 0   | 0   | 1   | 0   | 0   | 0   | 0   | 1   | 1   | 0    |
| 22659   | 0  | 0   | 0   | 0   | 103 | 181 | 8   | 28  | 216 | 721 | 255  |
| 187272  | 0  | 0   | 0   | 1   | 0   | 0   | 0   | 0   | 0   | 0   | 0    |
| 277388  | 0  | 0   | 0   | 1   | 0   | 0   | 0   | 0   | 0   | 0   | 0    |
| 318079  | 0  | 0   | 0   | 0   | 0   | 0   | 0   | 0   | 0   | 2   | 0    |
| 148056  | 2  | 5   | 40  | 64  | 21  | 69  | 90  | 246 | 902 | 668 | 721  |
| 270385  | 0  | 0   | 0   | 0   | 0   | 0   | 0   | 0   | 0   | 0   | 0    |
| 270382  | 0  | 0   | 0   | 0   | 0   | 0   | 0   | 0   | 0   | 0   | 0    |

Table S3 A

| ID      | A      | A.1   | A.2   | A.3    | A.4    | A.5   | A.6   | A.7    | A.8   | A.9    | A.10   |
|---------|--------|-------|-------|--------|--------|-------|-------|--------|-------|--------|--------|
| 301233  | 0      | 0     | 0     | 0      | 0      | 0     | 0     | 0      | 0     | 0      | 0      |
| 10518   | 0      | 0     | 0     | 0      | 0      | 0     | 0     | 0      | 0     | 0      | 0      |
| 827195  | 0      | 0     | 0     | 0      | 2      | 0     | 0     | 0      | 0     | 0      | 0      |
| 10512   | 0      | 0     | 0     | 0      | 0      | 0     | 0     | 0      | 0     | 0      | 0      |
| 338640  | 0      | 0     | 0     | 0      | 0      | 0     | 0     | 0      | 0     | 0      | 0      |
| 752584  | 108    | 25    | 72    | 127    | 409    | 195   | 275   | 506    | 323   | 300    | 336    |
| 198998  | 0      | 0     | 0     | 0      | 0      | 0     | 0     | 0      | 0     | 0      | 0      |
| 4357147 | 0      | 0     | 0     | 0      | 0      | 0     | 0     | 0      | 0     | 0      | 0      |
| 196122  | 3      | 2     | 2     | 4      | 1      | 0     | 0     | 0      | 0     | 0      | 0      |
| 839200  | 0      | 0     | 0     | 0      | 0      | 0     | 0     | 0      | 0     | 0      | 0      |
| 4483037 | 3      | 0     | 1     | 0      | 2      | 0     | 0     | 0      | 0     | 0      | 0      |
| 376862  | 0      | 0     | 0     | 0      | 8      | 3     | 1     | 2      | 1     | 0      | 0      |
| 148671  | 0      | 0     | 0     | 0      | 0      | 0     | 0     | 0      | 0     | 0      | 0      |
| 194504  | 0      | 0     | 0     | 0      | 0      | 0     | 0     | 0      | 0     | 0      | 0      |
| 4442899 | 0      | 0     | 0     | 0      | 0      | 0     | 0     | 0      | 0     | 0      | 0      |
| 278712  | 0      | 0     | 0     | 0      | 0      | 0     | 0     | 1      | 0     | 0      | 0      |
| 4469233 | 0      | 0     | 0     | 0      | 0      | 0     | 0     | 0      | 0     | 0      | 0      |
| 184484  | 3      | 0     | 0     | 0      | 0      | 1     | 0     | 0      | 0     | 0      | 0      |
| 655793  | 0      | 0     | 0     | 0      | 0      | 0     | 0     | 0      | 0     | 0      | 0      |
| 405780  | 0      | 0     | 0     | 0      | 0      | 0     | 0     | 0      | 0     | 0      | 0      |
| 174824  | 7      | 0     | 0     | 0      | 2      | 0     | 0     | 0      | 0     | 0      | 0      |
| 181193  | 0      | 0     | 0     | 0      | 0      | 0     | 0     | 0      | 0     | 0      | 0      |
| 3974550 | 0      | 0     | 0     | 0      | 56     | 103   | 2     | 6      | 98    | 267    | 96     |
| 173916  | 0      | 0     | 0     | 0      | 0      | 0     | 0     | 0      | 0     | 0      | 0      |
| 197623  | 2      | 0     | 0     | 5      | 5      | 2     | 0     | 0      | 2     | 1      | 3      |
| 628218  | 0      | 0     | 0     | 0      | 0      | 0     | 0     | 0      | 0     | 0      | 0      |
| 175706  | 4      | 0     | 0     | 3      | 4      | 1     | 1     | 5      | 1     | 1      | 0      |
| 183106  | 0      | 0     | 0     | 0      | 0      | 0     | 0     | 0      | 1     | 0      | 0      |
| 267958  | 7      | 0     | 0     | 0      | 1      | 0     | 0     | 0      | 0     | 0      | 0      |
| 189288  | 1      | 0     | 0     | 0      | 0      | 0     | 0     | 0      | 0     | 0      | 0      |
| 177621  | 3      | 0     | 0     | 0      | 0      | 0     | 0     | 0      | 0     | 0      | 0      |
| 829240  | 45     | 7     | 35    | 80     | 61     | 23    | 36    | 61     | 41    | 49     | 48     |
| 2645488 | 1      | 0     | 0     | 0      | 0      | 0     | 0     | 0      | 0     | 0      | 0      |
| 186886  | 1      | 0     | 0     | 0      | 0      | 1     | 0     | 0      | 0     | 0      | 0      |
| 210262  | 1      | 0     | 0     | 0      | 0      | 0     | 0     | 0      | 0     | 0      | 0      |
| 271822  | 3      | 1     | 0     | 2      | 0      | 0     | 0     | 0      | 0     | 1      | 0      |
| 196746  | 3      | 0     | 0     | 0      | 0      | 0     | 0     | 0      | 0     | 0      | 0      |
| 179343  | 0      | 0     | 0     | 0      | 0      | 0     | 0     | 0      | 2     | 0      | 1      |
| 4435934 | 0      | 0     | 0     | 0      | 0      | 0     | 0     | 0      | 0     | 0      | 0      |
| 746679  | 113371 | 20911 | 66206 | 112821 | 116425 | 74572 | 90839 | 130457 | 93802 | 131131 | 114795 |
| 4481506 | 0      | 0     | 0     | 0      | 2      | 0     | 1     | 4      | 2     | 3      | 2      |
| 4357315 | 0      | 0     | 0     | 0      | 0      | 0     | 0     | 0      | 0     | 0      | 0      |
| 452014  | 0      | 0     | 0     | 0      | 0      | 0     | 0     | 0      | 0     | 0      | 0      |
| 68844   | 0      | 0     | 0     | 0      | 0      | 0     | 0     | 0      | 0     | 0      | 0      |
| 272593  | 0      | 1     | 0     | 0      | 0      | 0     | 0     | 0      | 0     | 0      | 0      |

Table S3 A

| ID      | A     | A.1   | A.2   | A.3   | A.4   | A.5   | A.6   | A.7   | A.8   | A.9   | A.10  |
|---------|-------|-------|-------|-------|-------|-------|-------|-------|-------|-------|-------|
| 182995  | 0     | 0     | 0     | 2     | 1     | 1     | 0     | 1     | 2     | 3     | 4     |
| 4383135 | 0     | 0     | 0     | 3     | 2     | 0     | 0     | 0     | 0     | 0     | 0     |
| 328143  | 0     | 0     | 0     | 0     | 0     | 0     | 0     | 0     | 0     | 0     | 0     |
| 185614  | 0     | 0     | 0     | 0     | 0     | 1     | 0     | 0     | 0     | 0     | 0     |
| 4378081 | 0     | 0     | 0     | 0     | 0     | 0     | 0     | 0     | 1     | 0     | 0     |
| 162539  | 3     | 0     | 0     | 0     | 0     | 0     | 0     | 0     | 0     | 0     | 0     |
| 4459184 | 0     | 0     | 0     | 0     | 0     | 0     | 0     | 0     | 0     | 0     | 0     |
| 586453  | 1     | 0     | 0     | 0     | 0     | 0     | 0     | 0     | 2     | 0     | 0     |
| 827487  | 5416  | 1074  | 3755  | 6853  | 4074  | 2241  | 2699  | 4559  | 3057  | 3136  | 3465  |
| 184966  | 0     | 1     | 0     | 0     | 1     | 0     | 0     | 0     | 0     | 0     | 0     |
| 209028  | 0     | 0     | 0     | 0     | 0     | 0     | 0     | 0     | 0     | 0     | 0     |
| 197600  | 2     | 0     | 0     | 0     | 1     | 0     | 0     | 0     | 0     | 0     | 0     |
| 4446120 | 4     | 0     | 0     | 0     | 1     | 1     | 0     | 0     | 0     | 0     | 0     |
| 356187  | 0     | 0     | 0     | 0     | 0     | 0     | 0     | 0     | 0     | 0     | 0     |
| 1108078 | 0     | 0     | 0     | 0     | 0     | 0     | 0     | 0     | 0     | 0     | 0     |
| 1105589 | 0     | 0     | 0     | 0     | 0     | 0     | 0     | 0     | 0     | 0     | 0     |
| 4342104 | 5     | 0     | 0     | 1     | 3     | 0     | 0     | 0     | 0     | 0     | 0     |
| 180476  | 0     | 0     | 0     | 0     | 0     | 0     | 0     | 0     | 0     | 0     | 0     |
| 4335302 | 0     | 0     | 0     | 0     | 0     | 0     | 0     | 0     | 0     | 0     | 0     |
| 158302  | 0     | 0     | 0     | 0     | 0     | 0     | 0     | 0     | 0     | 0     | 2     |
| 445144  | 0     | 0     | 0     | 2     | 0     | 0     | 0     | 0     | 0     | 0     | 0     |
| 184753  | 1     | 0     | 0     | 0     | 0     | 0     | 0     | 0     | 0     | 0     | 0     |
| 192712  | 6     | 0     | 0     | 1     | 4     | 2     | 1     | 1     | 3     | 0     | 0     |
| 4414242 | 2     | 1     | 0     | 0     | 0     | 0     | 0     | 0     | 0     | 0     | 0     |
| 255098  | 0     | 0     | 0     | 0     | 25    | 59    | 4     | 10    | 54    | 248   | 66    |
| 173892  | 0     | 0     | 0     | 0     | 0     | 0     | 0     | 0     | 0     | 0     | 0     |
| 4329776 | 0     | 0     | 0     | 0     | 0     | 0     | 0     | 0     | 0     | 0     | 0     |
| 4483585 | 0     | 0     | 0     | 0     | 0     | 0     | 0     | 0     | 0     | 0     | 0     |
| 114111  | 10    | 1     | 0     | 3     | 0     | 1     | 0     | 0     | 0     | 0     | 0     |
| 214715  | 0     | 0     | 0     | 0     | 0     | 0     | 0     | 0     | 0     | 0     | 0     |
| 262159  | 0     | 0     | 0     | 0     | 0     | 0     | 0     | 0     | 0     | 0     | 0     |
| 277364  | 8     | 0     | 0     | 1     | 3     | 0     | 0     | 0     | 1     | 2     | 5     |
| 195433  | 0     | 0     | 0     | 0     | 0     | 0     | 0     | 0     | 0     | 0     | 0     |
| 4449236 | 20359 | 11869 | 16263 | 38251 | 17953 | 34839 | 22449 | 48094 | 64718 | 61882 | 45689 |
| 269401  | 1     | 0     | 0     | 1     | 0     | 1     | 0     | 0     | 0     | 0     | 0     |
| 261177  | 33    | 3     | 0     | 6     | 13    | 6     | 0     | 1     | 2     | 7     | 0     |
| 261178  | 0     | 0     | 0     | 0     | 0     | 0     | 0     | 0     | 0     | 0     | 0     |
| 190673  | 7     | 0     | 0     | 1     | 7     | 0     | 0     | 0     | 0     | 0     | 0     |
| 176836  | 0     | 0     | 0     | 0     | 0     | 0     | 0     | 0     | 0     | 2     | 0     |
| 188116  | 0     | 0     | 0     | 0     | 0     | 0     | 0     | 0     | 0     | 0     | 0     |
| 234121  | 0     | 0     | 0     | 0     | 0     | 0     | 0     | 0     | 0     | 0     | 0     |
| 144207  | 0     | 0     | 0     | 0     | 8     | 27    | 2     | 5     | 26    | 81    | 34    |
| 188786  | 0     | 0     | 0     | 0     | 0     | 0     | 0     | 0     | 0     | 0     | 0     |
| 196856  | 0     | 0     | 0     | 0     | 0     | 0     | 0     | 0     | 0     | 0     | 0     |
| 214116  | 0     | 0     | 0     | 0     | 0     | 0     | 0     | 0     | 0     | 1     | 0     |

Table S3 A

| ID      | A  | A.1 | A.2 | A.3 | A.4 | A.5 | A.6 | A.7 | A.8 | A.9 | A.10 |
|---------|----|-----|-----|-----|-----|-----|-----|-----|-----|-----|------|
| 265047  | 0  | 0   | 0   | 0   | 0   | 0   | 0   | 0   | 0   | 0   | 0    |
| 415491  | 0  | 0   | 0   | 0   | 0   | 0   | 0   | 0   | 0   | 0   | 0    |
| 4390365 | 0  | 0   | 0   | 0   | 1   | 0   | 0   | 0   | 0   | 0   | 0    |
| 174667  | 2  | 2   | 0   | 1   | 3   | 0   | 0   | 1   | 0   | 0   | 1    |
| 2901239 | 0  | 0   | 0   | 0   | 0   | 0   | 0   | 0   | 0   | 0   | 0    |
| 273687  | 0  | 0   | 0   | 0   | 0   | 0   | 0   | 0   | 0   | 0   | 0    |
| 319165  | 0  | 0   | 0   | 0   | 0   | 0   | 0   | 0   | 0   | 0   | 0    |
| 269426  | 1  | 0   | 0   | 1   | 1   | 0   | 0   | 0   | 0   | 0   | 0    |
| 270303  | 1  | 0   | 0   | 0   | 0   | 0   | 0   | 0   | 0   | 0   | 0    |
| 329271  | 0  | 0   | 0   | 0   | 0   | 0   | 0   | 0   | 0   | 0   | 0    |
| 198024  | 0  | 0   | 0   | 0   | 0   | 0   | 0   | 0   | 0   | 0   | 0    |
| 896545  | 14 | 21  | 1   | 7   | 6   | 50  | 6   | 0   | 52  | 365 | 40   |
| 263705  | 0  | 2   | 0   | 0   | 1   | 0   | 0   | 0   | 0   | 0   | 0    |
| 174418  | 5  | 3   | 0   | 4   | 2   | 0   | 0   | 0   | 0   | 0   | 0    |
| 174417  | 0  | 0   | 0   | 0   | 0   | 0   | 0   | 0   | 0   | 0   | 0    |
| 184329  | 0  | 0   | 0   | 0   | 0   | 0   | 0   | 0   | 0   | 0   | 0    |
| 192342  | 94 | 12  | 39  | 77  | 90  | 61  | 71  | 86  | 60  | 104 | 112  |
| 4453773 | 0  | 0   | 0   | 0   | 0   | 0   | 0   | 0   | 0   | 0   | 0    |
| 372473  | 68 | 43  | 75  | 99  | 29  | 42  | 52  | 59  | 0   | 0   | 4    |
| 199698  | 0  | 0   | 0   | 0   | 0   | 2   | 1   | 0   | 1   | 0   | 0    |
| 191067  | 2  | 0   | 0   | 0   | 0   | 1   | 0   | 0   | 0   | 0   | 0    |
| 453896  | 0  | 0   | 0   | 0   | 1   | 0   | 0   | 0   | 0   | 0   | 0    |
| 179548  | 1  | 0   | 1   | 0   | 0   | 0   | 0   | 0   | 1   | 0   | 0    |
| 179547  | 1  | 0   | 0   | 0   | 0   | 0   | 0   | 0   | 0   | 0   | 0    |
| 113978  | 0  | 0   | 0   | 1   | 0   | 0   | 0   | 0   | 0   | 0   | 0    |
| 3449666 | 0  | 0   | 0   | 0   | 0   | 0   | 0   | 0   | 0   | 0   | 0    |
| 4468234 | 0  | 0   | 1   | 2   | 0   | 0   | 0   | 0   | 0   | 0   | 1    |
| 4466275 | 0  | 0   | 0   | 0   | 2   | 0   | 0   | 0   | 0   | 0   | 0    |
| 186742  | 9  | 0   | 0   | 0   | 1   | 0   | 0   | 0   | 0   | 0   | 0    |
| 308332  | 15 | 4   | 0   | 3   | 5   | 2   | 0   | 0   | 1   | 0   | 0    |
| 318819  | 0  | 0   | 0   | 0   | 0   | 0   | 0   | 0   | 0   | 0   | 0    |
| 4379449 | 0  | 0   | 0   | 0   | 2   | 1   | 0   | 0   | 0   | 0   | 0    |
| 105109  | 0  | 0   | 0   | 0   | 0   | 0   | 0   | 0   | 0   | 0   | 0    |
| 261132  | 0  | 0   | 0   | 1   | 3   | 1   | 0   | 0   | 0   | 0   | 0    |
| 808794  | 0  | 0   | 0   | 0   | 0   | 0   | 0   | 0   | 0   | 0   | 0    |
| 407393  | 0  | 0   | 0   | 0   | 0   | 0   | 0   | 0   | 0   | 0   | 0    |
| 267406  | 0  | 1   | 0   | 1   | 0   | 0   | 0   | 0   | 0   | 0   | 0    |
| 672655  | 1  | 0   | 0   | 1   | 0   | 0   | 0   | 0   | 0   | 0   | 0    |
| 260989  | 0  | 0   | 0   | 0   | 0   | 0   | 0   | 0   | 0   | 0   | 0    |
| 2877100 | 1  | 0   | 0   | 0   | 0   | 0   | 0   | 0   | 0   | 0   | 0    |
| 305787  | 0  | 0   | 0   | 0   | 0   | 0   | 0   | 0   | 0   | 0   | 0    |
| 302641  | 0  | 0   | 0   | 0   | 0   | 0   | 0   | 0   | 0   | 0   | 0    |
| 1992    | 0  | 0   | 0   | 1   | 0   | 0   | 0   | 0   | 0   | 0   | 0    |
| 353073  | 0  | 0   | 0   | 0   | 0   | 0   | 0   | 0   | 0   | 0   | 0    |
| 134762  | 7  | 1   | 1   | 3   | 15  | 9   | 5   | 5   | 2   | 5   | 7    |

Table S3 A

| ID      | A  | A.1 | A.2 | A.3 | A.4 | A.5 | A.6 | A.7 | A.8 | A.9 | A.10 |
|---------|----|-----|-----|-----|-----|-----|-----|-----|-----|-----|------|
| 175646  | 0  | 0   | 0   | 0   | 5   | 0   | 0   | 0   | 0   | 0   | 0    |
| 263518  | 0  | 0   | 0   | 0   | 0   | 0   | 0   | 0   | 0   | 0   | 0    |
| 2137001 | 0  | 0   | 0   | 1   | 1   | 1   | 0   | 0   | 0   | 0   | 0    |
| 3231096 | 0  | 0   | 0   | 0   | 0   | 0   | 0   | 0   | 0   | 0   | 0    |
| 176444  | 9  | 1   | 1   | 7   | 2   | 6   | 0   | 0   | 1   | 0   | 0    |
| 261114  | 0  | 0   | 0   | 1   | 0   | 0   | 0   | 0   | 0   | 0   | 0    |
| 191216  | 0  | 0   | 0   | 0   | 0   | 0   | 0   | 0   | 0   | 0   | 0    |
| 191218  | 29 | 17  | 0   | 28  | 9   | 29  | 0   | 11  | 0   | 4   | 0    |
| 167509  | 0  | 0   | 0   | 0   | 1   | 0   | 0   | 0   | 0   | 0   | 0    |
| 175416  | 0  | 0   | 0   | 0   | 0   | 0   | 0   | 0   | 0   | 0   | 0    |
| 183829  | 0  | 1   | 0   | 3   | 0   | 0   | 0   | 0   | 0   | 0   | 0    |
| 4462541 | 46 | 3   | 0   | 4   | 13  | 0   | 0   | 1   | 0   | 1   | 0    |
| 2154095 | 0  | 0   | 0   | 1   | 0   | 0   | 0   | 0   | 0   | 0   | 0    |
| 4416434 | 6  | 3   | 0   | 1   | 0   | 1   | 0   | 2   | 2   | 0   | 1    |
| 440840  | 0  | 0   | 0   | 0   | 0   | 0   | 0   | 0   | 0   | 0   | 0    |
| 40798   | 0  | 0   | 0   | 0   | 0   | 0   | 0   | 0   | 0   | 0   | 0    |
| 229452  | 0  | 0   | 0   | 0   | 0   | 0   | 0   | 0   | 0   | 0   | 0    |
| 229455  | 0  | 0   | 0   | 0   | 0   | 0   | 0   | 0   | 0   | 0   | 0    |
| 178480  | 20 | 0   | 0   | 0   | 5   | 0   | 0   | 0   | 0   | 0   | 0    |
| 4454025 | 0  | 0   | 0   | 0   | 0   | 0   | 0   | 0   | 0   | 0   | 0    |
| 4470092 | 0  | 0   | 0   | 1   | 0   | 0   | 0   | 0   | 0   | 0   | 0    |
| 259846  | 2  | 6   | 0   | 6   | 0   | 0   | 0   | 0   | 0   | 0   | 0    |
| 177068  | 3  | 0   | 0   | 2   | 2   | 0   | 0   | 0   | 0   | 0   | 0    |
| 97263   | 0  | 0   | 0   | 0   | 0   | 0   | 0   | 0   | 0   | 1   | 0    |
| 197099  | 0  | 0   | 0   | 0   | 0   | 0   | 0   | 0   | 0   | 0   | 0    |
| 265976  | 0  | 0   | 0   | 0   | 0   | 0   | 0   | 0   | 0   | 0   | 0    |
| 324999  | 0  | 0   | 0   | 0   | 0   | 0   | 0   | 0   | 0   | 0   | 0    |
| 262677  | 0  | 1   | 0   | 0   | 0   | 1   | 0   | 0   | 0   | 0   | 0    |
| 647320  | 1  | 0   | 0   | 0   | 0   | 0   | 0   | 0   | 0   | 2   | 0    |
| 174573  | 0  | 0   | 0   | 0   | 2   | 0   | 0   | 1   | 0   | 0   | 0    |
| 174571  | 0  | 0   | 0   | 1   | 0   | 0   | 0   | 0   | 0   | 0   | 0    |
| 1571092 | 0  | 0   | 0   | 0   | 0   | 0   | 0   | 0   | 2   | 3   | 0    |
| 177271  | 24 | 4   | 0   | 2   | 9   | 0   | 0   | 2   | 1   | 0   | 0    |
| 4207913 | 0  | 0   | 0   | 0   | 1   | 0   | 0   | 0   | 0   | 0   | 0    |
| 1112121 | 0  | 0   | 0   | 0   | 0   | 0   | 0   | 0   | 0   | 0   | 0    |
| 4334624 | 2  | 0   | 0   | 0   | 1   | 0   | 0   | 4   | 6   | 0   | 1    |
| 390896  | 0  | 0   | 0   | 0   | 0   | 0   | 0   | 0   | 0   | 0   | 2    |
| 129394  | 0  | 0   | 0   | 0   | 0   | 0   | 0   | 0   | 0   | 0   | 0    |
| 2897325 | 1  | 0   | 0   | 1   | 0   | 0   | 0   | 1   | 0   | 0   | 0    |
| 786708  | 19 | 5   | 19  | 28  | 188 | 93  | 102 | 165 | 134 | 88  | 125  |
| 180235  | 5  | 0   | 0   | 1   | 1   | 1   | 0   | 0   | 0   | 1   | 0    |
| 185036  | 2  | 0   | 0   | 0   | 1   | 0   | 0   | 0   | 0   | 0   | 0    |
| 130335  | 0  | 0   | 0   | 0   | 0   | 0   | 0   | 0   | 0   | 0   | 0    |
| 259249  | 3  | 0   | 0   | 0   | 2   | 0   | 0   | 0   | 0   | 0   | 0    |
| 98048   | 0  | 0   | 0   | 0   | 0   | 0   | 0   | 0   | 0   | 0   | 0    |

Table S3 A

| ID      | A   | A.1 | A.2 | A.3 | A.4 | A.5 | A.6 | A.7 | A.8 | A.9 | A.10 |
|---------|-----|-----|-----|-----|-----|-----|-----|-----|-----|-----|------|
| 261892  | 0   | 0   | 0   | 0   | 0   | 2   | 0   | 0   | 0   | 0   | 0    |
| 1594231 | 0   | 0   | 0   | 0   | 0   | 0   | 0   | 0   | 0   | 0   | 0    |
| 4374042 | 9   | 1   | 5   | 12  | 2   | 0   | 0   | 0   | 0   | 1   | 1    |
| 204111  | 0   | 0   | 0   | 0   | 0   | 0   | 0   | 0   | 0   | 0   | 0    |
| 274380  | 0   | 0   | 0   | 0   | 0   | 0   | 0   | 0   | 0   | 0   | 0    |
| 176957  | 0   | 0   | 0   | 0   | 0   | 0   | 0   | 0   | 0   | 0   | 0    |
| 198238  | 0   | 0   | 0   | 0   | 0   | 0   | 0   | 0   | 0   | 0   | 0    |
| 1110253 | 0   | 0   | 0   | 1   | 0   | 1   | 0   | 0   | 0   | 0   | 0    |
| 171079  | 2   | 0   | 0   | 0   | 0   | 0   | 0   | 0   | 0   | 0   | 0    |
| 174004  | 2   | 4   | 0   | 0   | 3   | 0   | 0   | 1   | 1   | 0   | 0    |
| 182712  | 0   | 0   | 0   | 0   | 0   | 0   | 0   | 0   | 0   | 0   | 0    |
| 4417539 | 0   | 1   | 0   | 0   | 0   | 0   | 0   | 0   | 0   | 0   | 0    |
| 1107303 | 1   | 0   | 0   | 0   | 0   | 0   | 0   | 0   | 0   | 0   | 0    |
| 310407  | 0   | 0   | 0   | 0   | 0   | 0   | 0   | 0   | 0   | 0   | 0    |
| 201374  | 0   | 0   | 0   | 0   | 120 | 121 | 4   | 23  | 187 | 495 | 149  |
| 261409  | 0   | 0   | 0   | 0   | 0   | 0   | 0   | 0   | 0   | 0   | 0    |
| 320972  | 1   | 0   | 0   | 0   | 2   | 0   | 0   | 0   | 0   | 0   | 0    |
| 196974  | 0   | 0   | 0   | 0   | 0   | 0   | 0   | 0   | 0   | 0   | 0    |
| 345362  | 58  | 21  | 78  | 104 | 37  | 57  | 62  | 44  | 2   | 1   | 3    |
| 134065  | 16  | 0   | 0   | 0   | 3   | 0   | 0   | 0   | 0   | 0   | 0    |
| 191616  | 1   | 0   | 0   | 0   | 0   | 0   | 0   | 0   | 0   | 0   | 0    |
| 460953  | 0   | 2   | 0   | 2   | 0   | 0   | 0   | 0   | 0   | 0   | 0    |
| 174768  | 1   | 0   | 0   | 0   | 0   | 1   | 0   | 0   | 0   | 0   | 0    |
| 312322  | 0   | 0   | 0   | 0   | 0   | 0   | 0   | 0   | 0   | 0   | 0    |
| 724472  | 0   | 0   | 0   | 0   | 0   | 0   | 0   | 0   | 0   | 0   | 0    |
| 207749  | 0   | 0   | 0   | 0   | 0   | 0   | 0   | 0   | 0   | 0   | 0    |
| 189730  | 4   | 1   | 0   | 4   | 1   | 1   | 1   | 1   | 0   | 1   | 0    |
| 187841  | 0   | 0   | 0   | 0   | 0   | 0   | 0   | 0   | 0   | 0   | 0    |
| 186073  | 4   | 0   | 0   | 0   | 0   | 0   | 0   | 0   | 0   | 0   | 0    |
| 1087825 | 0   | 0   | 0   | 0   | 0   | 0   | 0   | 0   | 0   | 0   | 0    |
| 47477   | 1   | 0   | 0   | 0   | 1   | 0   | 0   | 0   | 0   | 0   | 0    |
| 4296701 | 0   | 0   | 0   | 0   | 0   | 0   | 0   | 0   | 0   | 0   | 0    |
| 169428  | 0   | 0   | 2   | 0   | 0   | 0   | 0   | 0   | 0   | 0   | 0    |
| 306469  | 2   | 1   | 0   | 1   | 0   | 0   | 0   | 0   | 0   | 0   | 0    |
| 833390  | 0   | 2   | 0   | 0   | 0   | 2   | 0   | 0   | 0   | 0   | 0    |
| 315147  | 0   | 0   | 0   | 0   | 1   | 0   | 0   | 0   | 0   | 0   | 0    |
| 342962  | 0   | 0   | 0   | 0   | 0   | 1   | 0   | 0   | 0   | 0   | 0    |
| 929476  | 107 | 70  | 168 | 235 | 153 | 236 | 233 | 229 | 0   | 1   | 2    |
| 635059  | 0   | 0   | 0   | 1   | 0   | 0   | 0   | 0   | 0   | 0   | 0    |
| 228310  | 21  | 0   | 0   | 0   | 3   | 3   | 0   | 0   | 0   | 0   | 0    |
| 172705  | 0   | 0   | 0   | 2   | 0   | 0   | 0   | 0   | 0   | 0   | 0    |
| 185177  | 0   | 0   | 0   | 0   | 0   | 0   | 0   | 0   | 0   | 0   | 0    |
| 413996  | 19  | 0   | 0   | 1   | 7   | 3   | 2   | 0   | 0   | 8   | 0    |
| 1106683 | 0   | 0   | 0   | 0   | 0   | 0   | 0   | 0   | 0   | 0   | 0    |
| 4314257 | 0   | 0   | 0   | 0   | 0   | 0   | 0   | 0   | 0   | 0   | 0    |

Table S3 A

| ID      | A   | A.1 | A.2 | A.3 | A.4  | A.5 | A.6  | A.7  | A.8  | A.9  | A.10 |
|---------|-----|-----|-----|-----|------|-----|------|------|------|------|------|
| 271013  | 0   | 0   | 0   | 0   | 0    | 0   | 0    | 0    | 0    | 0    | 0    |
| 264101  | 4   | 1   | 0   | 0   | 1    | 2   | 0    | 0    | 0    | 0    | 0    |
| 4402042 | 0   | 0   | 0   | 0   | 0    | 0   | 0    | 0    | 0    | 0    | 0    |
| 72820   | 0   | 0   | 0   | 1   | 0    | 0   | 0    | 0    | 0    | 3    | 0    |
| 194944  | 0   | 0   | 0   | 0   | 0    | 0   | 0    | 0    | 0    | 0    | 0    |
| 166535  | 0   | 0   | 0   | 0   | 2    | 0   | 0    | 0    | 0    | 0    | 0    |
| 247557  | 0   | 0   | 0   | 0   | 0    | 0   | 0    | 0    | 0    | 0    | 0    |
| 1871    | 0   | 0   | 1   | 2   | 0    | 0   | 0    | 0    | 0    | 0    | 0    |
| 350666  | 0   | 0   | 0   | 0   | 0    | 0   | 0    | 0    | 0    | 0    | 0    |
| 190242  | 0   | 2   | 0   | 1   | 0    | 0   | 0    | 0    | 0    | 0    | 0    |
| 100344  | 75  | 54  | 28  | 240 | 0    | 12  | 0    | 0    | 0    | 0    | 2    |
| 186338  | 0   | 0   | 0   | 1   | 1    | 0   | 0    | 1    | 0    | 0    | 1    |
| 542096  | 1   | 0   | 0   | 0   | 0    | 0   | 0    | 0    | 0    | 0    | 0    |
| 619224  | 0   | 0   | 1   | 0   | 2    | 0   | 1    | 0    | 0    | 0    | 1    |
| 179695  | 0   | 0   | 0   | 0   | 0    | 0   | 0    | 0    | 0    | 0    | 0    |
| 263664  | 11  | 1   | 0   | 4   | 6    | 0   | 0    | 1    | 0    | 2    | 1    |
| 265992  | 0   | 0   | 0   | 0   | 0    | 0   | 0    | 0    | 0    | 0    | 0    |
| 184209  | 5   | 1   | 0   | 1   | 0    | 0   | 0    | 0    | 0    | 0    | 0    |
| 261992  | 11  | 0   | 0   | 0   | 6    | 0   | 1    | 0    | 0    | 0    | 1    |
| 299858  | 0   | 0   | 0   | 0   | 0    | 0   | 0    | 0    | 0    | 0    | 0    |
| 259699  | 3   | 0   | 0   | 0   | 1    | 0   | 0    | 0    | 0    | 0    | 0    |
| 193723  | 0   | 0   | 0   | 0   | 0    | 0   | 0    | 0    | 0    | 0    | 0    |
| 204144  | 0   | 0   | 0   | 0   | 0    | 0   | 0    | 0    | 0    | 0    | 0    |
| 199403  | 2   | 0   | 0   | 3   | 1    | 3   | 0    | 0    | 0    | 3    | 0    |
| 1106468 | 0   | 0   | 0   | 0   | 0    | 0   | 0    | 0    | 0    | 0    | 0    |
| 176760  | 0   | 0   | 0   | 0   | 0    | 0   | 0    | 0    | 0    | 0    | 0    |
| 827592  | 0   | 0   | 0   | 0   | 0    | 0   | 0    | 0    | 0    | 0    | 0    |
| 416043  | 2   | 0   | 0   | 2   | 0    | 0   | 0    | 0    | 0    | 1    | 0    |
| 258641  | 0   | 0   | 0   | 1   | 1    | 0   | 0    | 0    | 0    | 0    | 0    |
| 36647   | 1   | 0   | 0   | 0   | 1    | 0   | 0    | 0    | 0    | 0    | 0    |
| 258423  | 5   | 0   | 0   | 2   | 4    | 0   | 0    | 0    | 0    | 0    | 0    |
| 258421  | 0   | 1   | 0   | 1   | 0    | 0   | 0    | 0    | 0    | 0    | 0    |
| 186555  | 0   | 0   | 0   | 1   | 2    | 0   | 0    | 0    | 0    | 0    | 0    |
| 306699  | 0   | 0   | 0   | 0   | 0    | 0   | 0    | 0    | 0    | 0    | 0    |
| 335267  | 0   | 0   | 0   | 0   | 0    | 0   | 0    | 0    | 0    | 0    | 0    |
| 771177  | 3   | 0   | 0   | 0   | 1    | 0   | 0    | 0    | 0    | 0    | 0    |
| 204171  | 0   | 0   | 0   | 0   | 1    | 1   | 0    | 0    | 1    | 0    | 0    |
| 299267  | 108 | 52  | 541 | 264 | 461  | 526 | 1078 | 869  | 0    | 2    | 0    |
| 264802  | 0   | 0   | 0   | 0   | 0    | 1   | 0    | 0    | 0    | 0    | 0    |
| 4296218 | 0   | 0   | 0   | 0   | 0    | 0   | 0    | 0    | 0    | 0    | 0    |
| 162005  | 1   | 0   | 0   | 3   | 0    | 0   | 0    | 0    | 0    | 0    | 0    |
| 176242  | 0   | 0   | 0   | 0   | 0    | 0   | 0    | 0    | 0    | 0    | 0    |
| 310751  | 0   | 0   | 0   | 0   | 0    | 0   | 0    | 0    | 0    | 0    | 0    |
| 813217  | 352 | 81  | 209 | 500 | 1869 | 866 | 1166 | 2009 | 1341 | 1310 | 1437 |
| 165430  | 2   | 0   | 0   | 0   | 0    | 0   | 0    | 0    | 0    | 0    | 0    |

Table S3 A

| ID      | A    | A.1   | A.2   | A.3   | A.4  | A.5   | A.6   | A.7  | A.8 | A.9 | A.10 |
|---------|------|-------|-------|-------|------|-------|-------|------|-----|-----|------|
| 522371  | 0    | 0     | 0     | 0     | 0    | 0     | 0     | 0    | 0   | 0   | 0    |
| 593043  | 15   | 68    | 162   | 15    | 9    | 138   | 289   | 0    | 0   | 0   | 0    |
| 304047  | 76   | 2     | 4     | 25    | 43   | 2     | 0     | 8    | 1   | 2   | 0    |
| 2084364 | 1787 | 747   | 2085  | 2446  | 706  | 1270  | 1234  | 1078 | 0   | 1   | 0    |
| 313724  | 0    | 0     | 0     | 1     | 0    | 0     | 0     | 0    | 0   | 0   | 0    |
| 2937207 | 125  | 55    | 35    | 277   | 0    | 10    | 0     | 3    | 12  | 3   | 1    |
| 175213  | 0    | 0     | 0     | 0     | 0    | 0     | 0     | 0    | 0   | 0   | 0    |
| 4480555 | 58   | 1     | 0     | 4     | 19   | 2     | 0     | 2    | 0   | 0   | 3    |
| 4480557 | 14   | 1     | 0     | 2     | 3    | 5     | 0     | 1    | 0   | 0   | 0    |
| 175077  | 1    | 0     | 1     | 1     | 0    | 0     | 0     | 0    | 0   | 0   | 0    |
| 188266  | 0    | 0     | 0     | 0     | 0    | 0     | 0     | 0    | 0   | 0   | 0    |
| 259578  | 0    | 0     | 0     | 0     | 0    | 0     | 0     | 0    | 0   | 0   | 0    |
| 177512  | 0    | 0     | 0     | 0     | 1    | 1     | 0     | 1    | 0   | 0   | 3    |
| 3319464 | 51   | 31    | 34    | 75    | 0    | 11    | 0     | 1    | 4   | 9   | 5    |
| 3390534 | 0    | 0     | 0     | 1     | 0    | 0     | 0     | 0    | 0   | 0   | 0    |
| 277067  | 0    | 0     | 0     | 0     | 0    | 0     | 0     | 0    | 0   | 0   | 0    |
| 199674  | 0    | 0     | 0     | 1     | 0    | 0     | 0     | 0    | 0   | 0   | 0    |
| 3920500 | 2    | 1     | 0     | 0     | 2    | 0     | 0     | 0    | 0   | 0   | 0    |
| 265483  | 2    | 1     | 0     | 0     | 0    | 0     | 0     | 0    | 0   | 0   | 0    |
| 399606  | 1    | 0     | 1     | 4     | 0    | 0     | 0     | 0    | 0   | 0   | 0    |
| 192971  | 0    | 1     | 0     | 0     | 2    | 0     | 0     | 0    | 0   | 0   | 0    |
| 275218  | 0    | 0     | 0     | 0     | 1    | 0     | 0     | 0    | 0   | 0   | 0    |
| 228043  | 0    | 1     | 0     | 0     | 0    | 0     | 0     | 0    | 0   | 0   | 0    |
| 261486  | 0    | 0     | 0     | 0     | 0    | 0     | 0     | 0    | 0   | 0   | 0    |
| 297577  | 1    | 0     | 0     | 0     | 0    | 0     | 0     | 0    | 0   | 0   | 0    |
| 3150250 | 2    | 0     | 0     | 0     | 0    | 0     | 0     | 0    | 0   | 0   | 0    |
| 578016  | 0    | 0     | 0     | 0     | 0    | 0     | 0     | 0    | 0   | 0   | 0    |
| 637546  | 92   | 18    | 52    | 97    | 87   | 50    | 65    | 103  | 86  | 71  | 82   |
| 195691  | 0    | 0     | 0     | 0     | 0    | 0     | 0     | 0    | 0   | 0   | 0    |
| 4483570 | 0    | 0     | 0     | 0     | 0    | 0     | 0     | 0    | 0   | 0   | 0    |
| 4306262 | 7474 | 34259 | 55817 | 15590 | 2658 | 89737 | 59471 | 38   | 44  | 44  | 25   |
| 184451  | 2    | 1     | 0     | 0     | 3    | 2     | 0     | 0    | 0   | 0   | 0    |
| 184456  | 0    | 0     | 0     | 0     | 0    | 0     | 0     | 0    | 0   | 0   | 0    |
| 814952  | 83   | 21    | 52    | 121   | 83   | 44    | 47    | 93   | 53  | 63  | 79   |
| 264225  | 0    | 0     | 0     | 0     | 0    | 0     | 0     | 0    | 0   | 0   | 0    |
| 198865  | 0    | 0     | 0     | 0     | 0    | 0     | 0     | 0    | 0   | 0   | 0    |
| 4405128 | 9    | 0     | 0     | 0     | 2    | 0     | 0     | 0    | 0   | 0   | 0    |
| 3265889 | 0    | 0     | 0     | 0     | 1    | 0     | 0     | 0    | 0   | 0   | 0    |
| 1107652 | 2    | 0     | 0     | 0     | 7    | 0     | 0     | 0    | 0   | 0   | 0    |
| 195337  | 0    | 1     | 0     | 0     | 0    | 0     | 0     | 0    | 0   | 0   | 0    |
| 196672  | 0    | 0     | 0     | 0     | 2    | 1     | 0     | 0    | 0   | 8   | 0    |
| 269726  | 3    | 0     | 0     | 1     | 3    | 0     | 0     | 0    | 0   | 0   | 0    |
| 179457  | 2    | 1     | 1     | 0     | 7    | 9     | 4     | 3    | 2   | 6   | 6    |
| 637934  | 1    | 0     | 0     | 0     | 0    | 0     | 0     | 0    | 0   | 0   | 0    |
| 262917  | 0    | 0     | 0     | 1     | 1    | 0     | 0     | 0    | 0   | 0   | 0    |



Table S3 A

| ID      | A   | A.1 | A.2 | A.3  | A.4 | A.5 | A.6 | A.7 | A.8  | A.9  | A.10 |
|---------|-----|-----|-----|------|-----|-----|-----|-----|------|------|------|
| 1108599 | 4   | 6   | 2   | 9    | 0   | 3   | 0   | 1   | 0    | 5    | 0    |
| 339329  | 0   | 0   | 0   | 0    | 0   | 0   | 0   | 0   | 0    | 0    | 0    |
| 2875735 | 18  | 4   | 1   | 8    | 6   | 1   | 1   | 3   | 0    | 0    | 3    |
| 4402834 | 0   | 0   | 0   | 0    | 0   | 0   | 0   | 0   | 0    | 0    | 0    |
| 313898  | 0   | 0   | 0   | 0    | 0   | 0   | 0   | 0   | 0    | 0    | 0    |
| 176071  | 0   | 0   | 0   | 0    | 0   | 0   | 0   | 0   | 0    | 0    | 0    |
| 277497  | 0   | 0   | 0   | 0    | 0   | 0   | 0   | 0   | 0    | 0    | 0    |
| 349343  | 0   | 0   | 0   | 0    | 0   | 0   | 0   | 0   | 0    | 0    | 0    |
| 203605  | 1   | 1   | 0   | 0    | 0   | 1   | 1   | 0   | 1    | 1    | 1    |
| 4389125 | 6   | 2   | 0   | 1    | 2   | 1   | 1   | 0   | 0    | 0    | 0    |
| 170926  | 0   | 0   | 0   | 0    | 0   | 0   | 0   | 0   | 0    | 2    | 0    |
| 4448052 | 1   | 0   | 0   | 0    | 0   | 0   | 0   | 0   | 1    | 0    | 0    |
| 174698  | 0   | 0   | 0   | 0    | 0   | 0   | 0   | 0   | 0    | 0    | 0    |
| 332962  | 1   | 1   | 0   | 0    | 0   | 0   | 0   | 0   | 0    | 0    | 0    |
| 3610691 | 155 | 137 | 282 | 1239 | 106 | 334 | 255 | 830 | 4969 | 4160 | 2887 |
| 4390754 | 0   | 0   | 0   | 0    | 1   | 0   | 0   | 0   | 0    | 0    | 0    |
| 4457427 | 0   | 0   | 0   | 0    | 0   | 0   | 0   | 0   | 0    | 0    | 0    |
| 320169  | 0   | 0   | 0   | 0    | 0   | 0   | 0   | 0   | 0    | 0    | 0    |
| 265116  | 0   | 0   | 0   | 0    | 0   | 0   | 0   | 0   | 0    | 0    | 0    |
| 269125  | 4   | 3   | 10  | 1    | 1   | 0   | 17  | 0   | 0    | 0    | 3    |
| 4449518 | 11  | 0   | 0   | 3    | 6   | 0   | 0   | 0   | 0    | 0    | 0    |
| 561069  | 3   | 0   | 0   | 0    | 0   | 0   | 0   | 0   | 0    | 0    | 0    |
| 299171  | 0   | 0   | 0   | 0    | 0   | 0   | 0   | 0   | 0    | 0    | 0    |
| 40230   | 0   | 0   | 0   | 0    | 0   | 0   | 0   | 0   | 0    | 0    | 0    |
| 569818  | 0   | 0   | 0   | 0    | 1   | 0   | 0   | 0   | 0    | 0    | 0    |
| 319219  | 0   | 0   | 0   | 0    | 0   | 0   | 0   | 0   | 0    | 0    | 0    |
| 198964  | 0   | 0   | 0   | 0    | 0   | 1   | 1   | 0   | 0    | 1    | 1    |
| 618010  | 349 | 69  | 276 | 505  | 351 | 216 | 299 | 378 | 247  | 335  | 321  |
| 342075  | 0   | 0   | 0   | 0    | 0   | 0   | 0   | 0   | 0    | 0    | 0    |
| 135956  | 0   | 0   | 1   | 0    | 0   | 0   | 0   | 0   | 0    | 0    | 0    |
| 3919797 | 14  | 1   | 0   | 1    | 14  | 1   | 0   | 0   | 0    | 0    | 0    |
| 265301  | 0   | 0   | 0   | 0    | 0   | 0   | 0   | 0   | 0    | 0    | 0    |
| 578058  | 19  | 5   | 24  | 37   | 42  | 34  | 43  | 60  | 46   | 33   | 65   |
| 10196   | 22  | 4   | 14  | 30   | 40  | 28  | 31  | 51  | 50   | 61   | 47   |
| 259511  | 0   | 0   | 0   | 0    | 0   | 0   | 0   | 0   | 0    | 0    | 0    |
| 183619  | 0   | 0   | 0   | 0    | 0   | 0   | 0   | 0   | 0    | 0    | 0    |
| 261076  | 0   | 0   | 0   | 0    | 0   | 0   | 0   | 0   | 0    | 0    | 0    |
| 270391  | 4   | 0   | 0   | 0    | 1   | 0   | 0   | 0   | 0    | 0    | 0    |
| 4440624 | 0   | 0   | 0   | 0    | 0   | 0   | 0   | 0   | 0    | 0    | 0    |
| 4460604 | 0   | 1   | 0   | 0    | 0   | 0   | 0   | 0   | 0    | 0    | 0    |
| 95424   | 1   | 0   | 0   | 1    | 0   | 0   | 0   | 0   | 0    | 0    | 0    |
| 436341  | 0   | 0   | 0   | 0    | 0   | 0   | 0   | 0   | 0    | 0    | 0    |
| 295075  | 0   | 0   | 0   | 0    | 0   | 0   | 0   | 0   | 0    | 0    | 0    |
| 1678333 | 0   | 0   | 0   | 0    | 0   | 0   | 0   | 0   | 0    | 0    | 0    |
| 243185  | 30  | 5   | 18  | 32   | 63  | 51  | 53  | 86  | 57   | 101  | 92   |

Table S3 A

| ID      | A    | A.1 | A.2  | A.3  | A.4  | A.5  | A.6  | A.7  | A.8  | A.9  | A.10 |
|---------|------|-----|------|------|------|------|------|------|------|------|------|
| 175998  | 0    | 0   | 0    | 0    | 0    | 0    | 0    | 0    | 0    | 0    | 0    |
| 3267277 | 1405 | 316 | 903  | 1762 | 2302 | 1164 | 1536 | 2382 | 1681 | 1608 | 1932 |
| 1931575 | 0    | 0   | 0    | 0    | 0    | 0    | 0    | 0    | 0    | 0    | 0    |
| 337784  | 0    | 0   | 0    | 0    | 0    | 0    | 0    | 0    | 0    | 0    | 0    |
| 1921818 | 0    | 0   | 0    | 0    | 0    | 0    | 0    | 0    | 0    | 0    | 0    |
| 3172949 | 11   | 0   | 0    | 1    | 1    | 6    | 3    | 2    | 7    | 16   | 5    |
| 3172943 | 0    | 0   | 0    | 0    | 0    | 0    | 0    | 0    | 0    | 0    | 0    |
| 645358  | 2    | 0   | 0    | 0    | 0    | 1    | 0    | 0    | 0    | 0    | 0    |
| 838685  | 0    | 4   | 0    | 3    | 0    | 0    | 0    | 1    | 2    | 0    | 1    |
| 828284  | 1537 | 286 | 1108 | 1913 | 1264 | 745  | 930  | 1344 | 940  | 1023 | 1057 |
| 1111755 | 32   | 20  | 2    | 16   | 8    | 38   | 0    | 1    | 3    | 2    | 2    |
| 188878  | 10   | 4   | 0    | 1    | 1    | 2    | 0    | 0    | 0    | 0    | 0    |
| 4401580 | 0    | 0   | 0    | 0    | 0    | 0    | 0    | 0    | 0    | 0    | 0    |
| 317854  | 0    | 0   | 0    | 0    | 10   | 17   | 2    | 5    | 26   | 60   | 22   |
| 4256470 | 0    | 0   | 0    | 0    | 0    | 1    | 0    | 0    | 0    | 0    | 0    |
| 839558  | 0    | 0   | 0    | 0    | 0    | 0    | 0    | 0    | 0    | 0    | 0    |
| 185743  | 0    | 0   | 0    | 0    | 0    | 0    | 0    | 0    | 0    | 0    | 0    |
| 4378740 | 0    | 0   | 0    | 0    | 0    | 3    | 1    | 2    | 3    | 0    | 0    |
| 266206  | 1    | 0   | 0    | 0    | 0    | 0    | 0    | 0    | 0    | 0    | 0    |
| 270513  | 0    | 1   | 0    | 0    | 0    | 0    | 0    | 0    | 0    | 0    | 0    |
| 334697  | 0    | 0   | 0    | 0    | 0    | 0    | 0    | 0    | 0    | 0    | 0    |
| 4352471 | 152  | 41  | 140  | 268  | 182  | 106  | 133  | 201  | 144  | 151  | 151  |
| 4426367 | 0    | 0   | 0    | 0    | 0    | 0    | 0    | 0    | 0    | 0    | 0    |
| 209030  | 4    | 0   | 0    | 1    | 4    | 0    | 0    | 0    | 0    | 0    | 0    |
| 190646  | 0    | 0   | 0    | 0    | 0    | 0    | 0    | 0    | 0    | 0    | 0    |
| 172389  | 0    | 0   | 0    | 0    | 0    | 0    | 0    | 0    | 0    | 0    | 0    |
| 213896  | 9    | 0   | 0    | 1    | 13   | 2    | 0    | 0    | 0    | 0    | 0    |
| 161762  | 0    | 0   | 0    | 0    | 0    | 0    | 0    | 0    | 0    | 0    | 0    |
| 174441  | 1    | 0   | 0    | 0    | 0    | 0    | 0    | 1    | 0    | 0    | 0    |
| 135625  | 0    | 0   | 0    | 0    | 0    | 0    | 0    | 0    | 0    | 0    | 0    |
| 4365109 | 0    | 0   | 0    | 0    | 0    | 0    | 0    | 0    | 0    | 0    | 0    |
| 832558  | 0    | 0   | 0    | 1    | 2    | 1    | 0    | 0    | 3    | 0    | 0    |
| 4464113 | 1    | 1   | 1    | 2    | 0    | 0    | 0    | 0    | 0    | 0    | 0    |
| 1105376 | 2    | 58  | 2    | 37   | 0    | 181  | 2    | 2    | 1    | 0    | 1    |
| 346275  | 0    | 0   | 0    | 0    | 0    | 0    | 0    | 0    | 0    | 0    | 0    |
| 3505032 | 0    | 0   | 0    | 0    | 136  | 361  | 9    | 22   | 279  | 1378 | 395  |
| 4355436 | 0    | 0   | 0    | 0    | 0    | 0    | 0    | 0    | 0    | 0    | 1    |
| 4480176 | 19   | 1   | 0    | 0    | 4    | 1    | 0    | 0    | 0    | 0    | 0    |
| 344527  | 0    | 0   | 0    | 0    | 2    | 0    | 0    | 0    | 0    | 0    | 0    |
| 4372003 | 0    | 0   | 0    | 1    | 0    | 0    | 0    | 0    | 0    | 0    | 0    |
| 172464  | 0    | 1   | 1    | 33   | 0    | 2    | 0    | 0    | 0    | 0    | 0    |
| 289709  | 58   | 39  | 59   | 102  | 37   | 55   | 46   | 46   | 0    | 0    | 0    |
| 174854  | 1    | 0   | 0    | 0    | 1    | 0    | 0    | 0    | 0    | 0    | 0    |
| 830014  | 0    | 0   | 0    | 0    | 0    | 0    | 0    | 0    | 0    | 3    | 0    |
| 189666  | 0    | 0   | 0    | 0    | 0    | 0    | 0    | 0    | 0    | 0    | 0    |

Table S3 A

| ID      | A    | A.1 | A.2 | A.3  | A.4  | A.5  | A.6  | A.7  | A.8  | A.9  | A.10 |
|---------|------|-----|-----|------|------|------|------|------|------|------|------|
| 304416  | 0    | 0   | 0   | 0    | 0    | 0    | 0    | 0    | 0    | 0    | 0    |
| 214835  | 2    | 0   | 0   | 1    | 3    | 0    | 0    | 0    | 0    | 0    | 0    |
| 260346  | 0    | 0   | 0   | 0    | 0    | 0    | 0    | 0    | 0    | 0    | 0    |
| 195445  | 0    | 0   | 0   | 0    | 0    | 0    | 0    | 0    | 0    | 0    | 0    |
| 263420  | 0    | 0   | 0   | 0    | 0    | 0    | 0    | 0    | 0    | 0    | 0    |
| 187959  | 0    | 0   | 0   | 0    | 0    | 0    | 0    | 0    | 0    | 0    | 0    |
| 199707  | 0    | 0   | 0   | 0    | 0    | 0    | 0    | 0    | 0    | 0    | 0    |
| 175485  | 0    | 0   | 0   | 1    | 0    | 0    | 0    | 0    | 0    | 0    | 0    |
| 193064  | 0    | 0   | 0   | 1    | 2    | 0    | 0    | 0    | 0    | 0    | 0    |
| 174285  | 22   | 1   | 0   | 1    | 7    | 0    | 0    | 0    | 0    | 0    | 0    |
| 1110752 | 8    | 1   | 0   | 0    | 4    | 6    | 0    | 0    | 1    | 0    | 0    |
| 177414  | 0    | 0   | 0   | 0    | 0    | 0    | 1    | 0    | 3    | 0    | 0    |
| 882782  | 0    | 0   | 0   | 0    | 0    | 0    | 0    | 0    | 0    | 0    | 0    |
| 180465  | 0    | 0   | 0   | 0    | 0    | 0    | 0    | 0    | 0    | 0    | 0    |
| 1113553 | 0    | 0   | 0   | 0    | 485  | 954  | 45   | 116  | 905  | 4602 | 1258 |
| 347490  | 1    | 0   | 0   | 1    | 0    | 0    | 0    | 0    | 0    | 0    | 0    |
| 322991  | 0    | 0   | 0   | 0    | 0    | 0    | 0    | 0    | 1    | 0    | 0    |
| 4327628 | 17   | 17  | 39  | 159  | 12   | 26   | 28   | 94   | 496  | 298  | 275  |
| 819999  | 15   | 8   | 38  | 34   | 313  | 464  | 386  | 569  | 574  | 1242 | 824  |
| 4402077 | 1    | 0   | 0   | 0    | 1    | 0    | 0    | 0    | 0    | 0    | 0    |
| 63144   | 0    | 0   | 0   | 0    | 21   | 30   | 1    | 1    | 34   | 97   | 51   |
| 233691  | 0    | 0   | 0   | 0    | 0    | 0    | 0    | 0    | 0    | 0    | 0    |
| 1108453 | 0    | 0   | 0   | 2    | 0    | 0    | 0    | 0    | 0    | 0    | 0    |
| 38278   | 0    | 0   | 0   | 0    | 0    | 0    | 0    | 0    | 0    | 2    | 0    |
| 181419  | 0    | 0   | 0   | 0    | 0    | 0    | 0    | 0    | 0    | 0    | 0    |
| 183675  | 1    | 1   | 0   | 1    | 2    | 0    | 0    | 0    | 0    | 0    | 1    |
| 259901  | 0    | 0   | 0   | 0    | 0    | 0    | 0    | 0    | 0    | 0    | 0    |
| 322839  | 7    | 3   | 0   | 4    | 3    | 3    | 0    | 2    | 2    | 0    | 0    |
| 194388  | 0    | 0   | 0   | 0    | 0    | 0    | 0    | 0    | 0    | 0    | 0    |
| 307416  | 0    | 0   | 0   | 0    | 0    | 0    | 0    | 0    | 0    | 1    | 0    |
| 190063  | 0    | 0   | 0   | 0    | 0    | 0    | 0    | 0    | 0    | 0    | 0    |
| 313274  | 0    | 0   | 0   | 0    | 0    | 0    | 0    | 0    | 0    | 0    | 0    |
| 1136443 | 72   | 5   | 2   | 23   | 24   | 0    | 0    | 0    | 0    | 5    | 2    |
| 421893  | 0    | 0   | 0   | 0    | 0    | 0    | 0    | 0    | 0    | 0    | 0    |
| 3325760 | 0    | 0   | 0   | 0    | 0    | 0    | 0    | 0    | 0    | 0    | 0    |
| 343130  | 0    | 0   | 0   | 0    | 0    | 0    | 0    | 0    | 0    | 0    | 0    |
| 174260  | 0    | 0   | 0   | 0    | 0    | 0    | 0    | 0    | 0    | 0    | 0    |
| 4453627 | 0    | 0   | 0   | 0    | 0    | 0    | 0    | 0    | 0    | 0    | 0    |
| 348785  | 0    | 0   | 0   | 0    | 0    | 0    | 0    | 0    | 0    | 0    | 0    |
| 189789  | 0    | 0   | 0   | 0    | 0    | 0    | 0    | 0    | 0    | 0    | 0    |
| 3056461 | 1    | 0   | 0   | 0    | 0    | 0    | 0    | 0    | 0    | 0    | 0    |
| 188785  | 0    | 0   | 0   | 0    | 0    | 0    | 0    | 0    | 0    | 0    | 0    |
| 354736  | 3    | 0   | 0   | 5    | 0    | 0    | 0    | 0    | 0    | 0    | 0    |
| 263953  | 0    | 0   | 0   | 0    | 0    | 0    | 0    | 0    | 0    | 0    | 0    |
| 635304  | 1217 | 233 | 858 | 1451 | 2290 | 1171 | 1475 | 2379 | 1664 | 1773 | 1852 |

Table S3 A

| ID      | A  | A.1 | A.2 | A.3 | A.4 | A.5 | A.6 | A.7 | A.8 | A.9 | A.10 |
|---------|----|-----|-----|-----|-----|-----|-----|-----|-----|-----|------|
| 309663  | 42 | 3   | 0   | 6   | 24  | 1   | 0   | 1   | 1   | 0   | 0    |
| 198604  | 1  | 1   | 0   | 0   | 0   | 0   | 0   | 0   | 0   | 0   | 0    |
| 205160  | 0  | 0   | 0   | 0   | 0   | 0   | 0   | 0   | 2   | 0   | 0    |
| 264657  | 3  | 0   | 0   | 0   | 1   | 0   | 0   | 0   | 0   | 0   | 0    |
| 273928  | 0  | 0   | 0   | 0   | 0   | 0   | 0   | 0   | 0   | 0   | 0    |
| 197025  | 0  | 0   | 0   | 1   | 0   | 0   | 0   | 0   | 0   | 0   | 0    |
| 157999  | 1  | 0   | 0   | 0   | 0   | 0   | 0   | 0   | 0   | 0   | 0    |
| 385545  | 0  | 0   | 1   | 1   | 0   | 0   | 0   | 1   | 0   | 0   | 0    |
| 186777  | 1  | 0   | 0   | 0   | 1   | 0   | 0   | 0   | 0   | 0   | 0    |
| 30067   | 0  | 0   | 0   | 0   | 0   | 0   | 0   | 0   | 0   | 0   | 0    |
| 177205  | 0  | 0   | 0   | 0   | 0   | 0   | 0   | 0   | 0   | 0   | 0    |
| 4401375 | 1  | 1   | 0   | 0   | 0   | 1   | 0   | 0   | 0   | 0   | 0    |
| 176139  | 0  | 0   | 0   | 0   | 0   | 0   | 0   | 0   | 0   | 0   | 0    |
| 3998912 | 0  | 0   | 0   | 0   | 0   | 0   | 0   | 0   | 0   | 0   | 0    |
| 175114  | 0  | 0   | 0   | 0   | 0   | 0   | 0   | 0   | 0   | 0   | 0    |
| 176868  | 0  | 0   | 0   | 1   | 0   | 0   | 0   | 0   | 0   | 0   | 0    |
| 191878  | 0  | 0   | 0   | 0   | 0   | 0   | 0   | 0   | 0   | 0   | 0    |
| 259195  | 0  | 0   | 0   | 0   | 0   | 0   | 0   | 0   | 0   | 0   | 0    |
| 174791  | 2  | 0   | 0   | 1   | 2   | 1   | 0   | 0   | 1   | 1   | 0    |
| 2624257 | 2  | 0   | 0   | 0   | 1   | 0   | 0   | 0   | 0   | 0   | 0    |
| 271734  | 2  | 0   | 0   | 0   | 0   | 0   | 0   | 0   | 0   | 0   | 0    |
| 174420  | 0  | 0   | 0   | 0   | 0   | 0   | 0   | 0   | 0   | 0   | 0    |
| 1517779 | 11 | 1   | 0   | 2   | 6   | 1   | 0   | 1   | 0   | 0   | 0    |
| 1108378 | 1  | 0   | 0   | 0   | 0   | 1   | 0   | 0   | 0   | 0   | 0    |
| 319816  | 0  | 0   | 0   | 0   | 0   | 0   | 0   | 0   | 0   | 0   | 0    |
| 606063  | 20 | 8   | 14  | 31  | 84  | 43  | 48  | 95  | 70  | 66  | 80   |
| 4420272 | 1  | 0   | 0   | 0   | 0   | 0   | 0   | 0   | 0   | 0   | 0    |
| 266091  | 0  | 0   | 0   | 0   | 0   | 0   | 0   | 0   | 0   | 0   | 0    |
| 177014  | 31 | 1   | 0   | 3   | 19  | 2   | 5   | 7   | 12  | 6   | 2    |
| 2978254 | 4  | 1   | 0   | 1   | 0   | 2   | 0   | 0   | 0   | 0   | 2    |
| 51677   | 5  | 0   | 0   | 1   | 4   | 0   | 0   | 1   | 0   | 0   | 0    |
| 345211  | 0  | 0   | 0   | 0   | 0   | 0   | 0   | 0   | 0   | 0   | 0    |
| 4476330 | 0  | 0   | 0   | 0   | 0   | 0   | 0   | 0   | 0   | 0   | 0    |
| 113417  | 0  | 1   | 0   | 0   | 0   | 0   | 0   | 0   | 0   | 0   | 0    |
| 174651  | 0  | 0   | 0   | 1   | 0   | 0   | 0   | 0   | 0   | 0   | 0    |
| 263366  | 0  | 0   | 0   | 0   | 0   | 0   | 0   | 0   | 0   | 0   | 0    |
| 178068  | 0  | 0   | 0   | 0   | 0   | 2   | 1   | 2   | 2   | 1   | 0    |
| 273904  | 0  | 0   | 0   | 0   | 0   | 0   | 0   | 0   | 0   | 0   | 0    |
| 258559  | 20 | 4   | 0   | 0   | 5   | 3   | 0   | 0   | 0   | 0   | 0    |
| 2315700 | 0  | 0   | 0   | 0   | 1   | 0   | 0   | 0   | 0   | 0   | 0    |
| 4418586 | 15 | 0   | 0   | 1   | 9   | 4   | 0   | 0   | 0   | 0   | 0    |
| 276629  | 0  | 0   | 0   | 0   | 0   | 0   | 0   | 0   | 0   | 0   | 0    |
| 4424327 | 1  | 0   | 0   | 6   | 1   | 6   | 0   | 1   | 0   | 0   | 0    |
| 831301  | 0  | 0   | 0   | 1   | 0   | 1   | 0   | 0   | 0   | 0   | 0    |
| 190026  | 0  | 0   | 0   | 0   | 0   | 0   | 0   | 0   | 0   | 0   | 0    |

Table S3 A

| ID      | A  | A.1 | A.2 | A.3 | A.4 | A.5 | A.6 | A.7 | A.8 | A.9 | A.10 |
|---------|----|-----|-----|-----|-----|-----|-----|-----|-----|-----|------|
| 4476780 | 0  | 0   | 0   | 0   | 0   | 0   | 0   | 0   | 0   | 0   | 0    |
| 570367  | 1  | 0   | 0   | 0   | 0   | 0   | 0   | 0   | 0   | 0   | 0    |
| 210950  | 3  | 1   | 0   | 0   | 2   | 0   | 0   | 0   | 0   | 0   | 0    |
| 4366524 | 1  | 0   | 0   | 0   | 0   | 0   | 0   | 0   | 0   | 0   | 0    |
| 272192  | 0  | 0   | 0   | 0   | 0   | 0   | 0   | 0   | 0   | 0   | 0    |
| 136604  | 0  | 0   | 0   | 1   | 0   | 0   | 0   | 0   | 0   | 0   | 0    |
| 192316  | 3  | 0   | 1   | 0   | 1   | 0   | 0   | 0   | 3   | 1   | 0    |
| 2072645 | 59 | 21  | 83  | 103 | 94  | 142 | 113 | 168 | 1   | 0   | 0    |
| 181719  | 15 | 0   | 0   | 1   | 1   | 0   | 0   | 0   | 4   | 0   | 0    |
| 292892  | 0  | 0   | 0   | 0   | 0   | 0   | 0   | 0   | 0   | 0   | 0    |
| 340600  | 0  | 0   | 0   | 0   | 0   | 0   | 0   | 0   | 0   | 0   | 0    |
| 261590  | 5  | 1   | 0   | 2   | 1   | 3   | 0   | 0   | 0   | 2   | 0    |
| 168984  | 5  | 1   | 0   | 0   | 5   | 0   | 0   | 0   | 0   | 0   | 0    |
| 1703712 | 0  | 0   | 0   | 0   | 0   | 0   | 0   | 0   | 0   | 0   | 0    |
| 264345  | 0  | 0   | 0   | 0   | 0   | 0   | 0   | 0   | 0   | 0   | 0    |
| 209845  | 0  | 0   | 0   | 0   | 0   | 0   | 0   | 0   | 0   | 0   | 0    |
| 198209  | 1  | 0   | 0   | 0   | 0   | 3   | 0   | 1   | 0   | 0   | 0    |
| 171532  | 1  | 0   | 0   | 0   | 0   | 0   | 0   | 0   | 0   | 0   | 0    |
| 299600  | 0  | 0   | 0   | 0   | 0   | 0   | 0   | 0   | 0   | 0   | 0    |
| 273967  | 0  | 0   | 0   | 0   | 0   | 0   | 0   | 0   | 0   | 0   | 0    |
| 4449984 | 0  | 0   | 0   | 3   | 0   | 0   | 0   | 0   | 0   | 0   | 0    |
| 325850  | 0  | 0   | 0   | 0   | 0   | 0   | 0   | 0   | 0   | 0   | 0    |
| 801260  | 0  | 0   | 0   | 0   | 2   | 0   | 0   | 0   | 0   | 0   | 0    |
| 259631  | 0  | 1   | 0   | 0   | 0   | 0   | 0   | 0   | 0   | 0   | 0    |
| 278609  | 2  | 0   | 0   | 2   | 0   | 0   | 0   | 0   | 0   | 0   | 0    |
| 264155  | 0  | 0   | 0   | 0   | 0   | 0   | 0   | 0   | 1   | 0   | 0    |
| 333576  | 0  | 0   | 0   | 0   | 0   | 0   | 0   | 0   | 0   | 0   | 0    |
| 194665  | 0  | 0   | 0   | 1   | 0   | 0   | 0   | 1   | 0   | 0   | 0    |
| 194662  | 0  | 0   | 0   | 0   | 0   | 0   | 0   | 0   | 0   | 0   | 0    |
| 2897332 | 4  | 0   | 0   | 1   | 0   | 0   | 0   | 0   | 0   | 0   | 0    |
| 178490  | 0  | 0   | 0   | 2   | 0   | 0   | 0   | 0   | 0   | 0   | 0    |
| 262801  | 2  | 0   | 0   | 0   | 1   | 0   | 0   | 0   | 0   | 0   | 0    |
| 4471130 | 1  | 0   | 0   | 0   | 4   | 0   | 2   | 0   | 0   | 0   | 0    |
| 4471135 | 0  | 0   | 0   | 0   | 0   | 0   | 0   | 0   | 0   | 0   | 0    |
| 259275  | 0  | 0   | 0   | 0   | 1   | 0   | 0   | 0   | 0   | 0   | 0    |
| 198194  | 3  | 0   | 0   | 0   | 0   | 0   | 0   | 0   | 0   | 0   | 0    |
| 575261  | 0  | 1   | 0   | 0   | 0   | 0   | 0   | 0   | 0   | 0   | 0    |
| 258849  | 16 | 1   | 0   | 0   | 4   | 2   | 0   | 0   | 0   | 0   | 0    |
| 4045882 | 0  | 0   | 0   | 0   | 0   | 0   | 0   | 0   | 0   | 0   | 1    |
| 177917  | 0  | 0   | 0   | 0   | 1   | 0   | 0   | 0   | 1   | 0   | 0    |
| 298973  | 0  | 0   | 0   | 0   | 0   | 0   | 0   | 0   | 0   | 0   | 0    |
| 835456  | 0  | 0   | 0   | 0   | 1   | 0   | 0   | 0   | 0   | 0   | 0    |
| 276663  | 0  | 0   | 0   | 0   | 0   | 1   | 0   | 0   | 0   | 0   | 0    |
| 3868285 | 10 | 2   | 1   | 14  | 0   | 0   | 0   | 4   | 0   | 0   | 2    |
| 276484  | 0  | 0   | 0   | 0   | 0   | 0   | 0   | 0   | 0   | 0   | 0    |

Table S3 A

| ID      | A  | A.1 | A.2 | A.3 | A.4 | A.5 | A.6 | A.7 | A.8 | A.9 | A.10 |
|---------|----|-----|-----|-----|-----|-----|-----|-----|-----|-----|------|
| 192598  | 1  | 2   | 0   | 0   | 0   | 0   | 0   | 0   | 0   | 0   | 0    |
| 4343528 | 8  | 0   | 0   | 1   | 0   | 3   | 0   | 0   | 0   | 0   | 0    |
| 260233  | 0  | 0   | 0   | 0   | 0   | 0   | 0   | 0   | 0   | 0   | 0    |
| 174770  | 0  | 0   | 0   | 0   | 0   | 0   | 0   | 0   | 0   | 0   | 0    |
| 272953  | 1  | 0   | 0   | 1   | 0   | 0   | 0   | 0   | 0   | 0   | 0    |
| 176886  | 0  | 0   | 0   | 0   | 0   | 0   | 0   | 1   | 0   | 1   | 0    |
| 4466618 | 34 | 16  | 13  | 46  | 404 | 190 | 229 | 470 | 255 | 312 | 285  |
| 259870  | 0  | 0   | 0   | 0   | 0   | 0   | 2   | 0   | 0   | 0   | 0    |
| 4450025 | 0  | 0   | 0   | 0   | 0   | 0   | 0   | 0   | 0   | 0   | 0    |
| 661055  | 0  | 0   | 0   | 0   | 0   | 0   | 0   | 1   | 0   | 0   | 0    |
| 210292  | 12 | 1   | 0   | 1   | 4   | 4   | 2   | 1   | 0   | 1   | 2    |
| 166099  | 0  | 0   | 0   | 0   | 0   | 0   | 0   | 0   | 0   | 0   | 0    |
| 345582  | 0  | 0   | 0   | 0   | 0   | 0   | 0   | 0   | 0   | 0   | 0    |
| 261334  | 0  | 0   | 0   | 0   | 0   | 0   | 0   | 0   | 0   | 0   | 0    |
| 136783  | 1  | 0   | 0   | 0   | 0   | 0   | 0   | 0   | 0   | 0   | 0    |
| 314424  | 0  | 0   | 0   | 0   | 0   | 1   | 0   | 0   | 0   | 0   | 0    |
| 771140  | 0  | 3   | 0   | 9   | 0   | 1   | 0   | 0   | 0   | 0   | 0    |
| 177930  | 0  | 0   | 0   | 0   | 0   | 0   | 0   | 0   | 0   | 0   | 0    |
| 274095  | 0  | 0   | 0   | 0   | 0   | 0   | 0   | 0   | 0   | 0   | 0    |
| 185519  | 0  | 0   | 0   | 0   | 0   | 0   | 0   | 0   | 0   | 0   | 0    |
| 162639  | 41 | 0   | 0   | 9   | 11  | 2   | 0   | 3   | 0   | 0   | 0    |
| 578649  | 0  | 0   | 0   | 0   | 1   | 0   | 0   | 0   | 0   | 0   | 0    |
| 312311  | 1  | 0   | 0   | 0   | 1   | 0   | 0   | 0   | 0   | 0   | 0    |
| 569522  | 1  | 0   | 1   | 1   | 1   | 1   | 0   | 0   | 1   | 0   | 0    |
| 2212505 | 28 | 4   | 0   | 8   | 21  | 6   | 2   | 2   | 2   | 7   | 2    |
| 214120  | 0  | 0   | 0   | 0   | 0   | 0   | 0   | 0   | 0   | 0   | 0    |
| 258411  | 0  | 0   | 0   | 0   | 0   | 0   | 0   | 0   | 0   | 0   | 0    |
| 4371295 | 1  | 0   | 0   | 0   | 0   | 0   | 0   | 0   | 0   | 0   | 0    |
| 2797565 | 4  | 0   | 0   | 0   | 0   | 0   | 0   | 0   | 0   | 0   | 0    |
| 1991255 | 0  | 0   | 0   | 0   | 0   | 0   | 0   | 0   | 0   | 0   | 0    |
| 261350  | 1  | 0   | 0   | 5   | 3   | 4   | 0   | 3   | 3   | 0   | 2    |
| 14035   | 3  | 0   | 0   | 0   | 0   | 0   | 0   | 0   | 0   | 0   | 0    |
| 264325  | 0  | 0   | 0   | 0   | 0   | 0   | 0   | 0   | 0   | 3   | 0    |
| 437137  | 14 | 2   | 0   | 4   | 3   | 8   | 0   | 4   | 3   | 0   | 0    |
| 4481359 | 0  | 0   | 0   | 0   | 0   | 0   | 0   | 0   | 0   | 0   | 0    |
| 112720  | 0  | 1   | 0   | 0   | 0   | 0   | 0   | 0   | 0   | 0   | 0    |
| 311788  | 1  | 1   | 0   | 1   | 1   | 0   | 0   | 0   | 0   | 0   | 0    |
| 833381  | 0  | 0   | 0   | 0   | 0   | 0   | 0   | 0   | 0   | 0   | 0    |
| 177952  | 2  | 0   | 0   | 0   | 2   | 0   | 0   | 0   | 1   | 0   | 0    |
| 4483264 | 0  | 0   | 0   | 0   | 0   | 0   | 0   | 0   | 0   | 0   | 0    |
| 310781  | 0  | 0   | 0   | 0   | 0   | 0   | 0   | 0   | 0   | 0   | 0    |
| 4477372 | 0  | 0   | 0   | 0   | 0   | 0   | 0   | 0   | 0   | 0   | 0    |
| 342685  | 1  | 0   | 0   | 0   | 0   | 0   | 0   | 0   | 0   | 0   | 0    |
| 4413888 | 0  | 0   | 0   | 0   | 0   | 0   | 0   | 0   | 0   | 0   | 0    |
| 273091  | 0  | 0   | 0   | 0   | 5   | 0   | 0   | 0   | 0   | 0   | 0    |

Table S3 A

| ID      | A   | A.1 | A.2 | A.3 | A.4 | A.5 | A.6 | A.7  | A.8 | A.9 | A.10 |
|---------|-----|-----|-----|-----|-----|-----|-----|------|-----|-----|------|
| 324013  | 0   | 0   | 0   | 0   | 0   | 0   | 0   | 0    | 0   | 0   | 0    |
| 177371  | 0   | 0   | 0   | 0   | 6   | 1   | 1   | 3    | 7   | 2   | 1    |
| 4393892 | 1   | 0   | 0   | 0   | 0   | 0   | 0   | 0    | 0   | 0   | 0    |
| 4378477 | 1   | 1   | 9   | 7   | 45  | 67  | 37  | 43   | 74  | 179 | 112  |
| 4327763 | 0   | 0   | 0   | 0   | 0   | 0   | 0   | 0    | 0   | 0   | 0    |
| 1902400 | 10  | 0   | 1   | 0   | 0   | 0   | 0   | 0    | 0   | 0   | 0    |
| 181091  | 0   | 0   | 0   | 0   | 0   | 0   | 0   | 0    | 0   | 0   | 0    |
| 4384058 | 60  | 16  | 39  | 90  | 978 | 542 | 719 | 1074 | 762 | 964 | 860  |
| 1112373 | 0   | 0   | 0   | 0   | 0   | 0   | 0   | 0    | 0   | 0   | 0    |
| 180879  | 1   | 4   | 0   | 1   | 0   | 0   | 0   | 2    | 0   | 0   | 0    |
| 356226  | 0   | 0   | 0   | 0   | 0   | 0   | 0   | 0    | 0   | 0   | 0    |
| 197706  | 1   | 0   | 0   | 0   | 0   | 0   | 0   | 0    | 0   | 0   | 0    |
| 264468  | 1   | 4   | 0   | 1   | 3   | 16  | 0   | 0    | 0   | 0   | 0    |
| 186549  | 0   | 0   | 0   | 0   | 0   | 0   | 0   | 0    | 0   | 0   | 0    |
| 185550  | 1   | 0   | 0   | 0   | 1   | 1   | 3   | 4    | 4   | 3   | 1    |
| 177748  | 0   | 0   | 0   | 0   | 0   | 0   | 0   | 0    | 0   | 0   | 0    |
| 189309  | 0   | 0   | 0   | 1   | 0   | 0   | 0   | 0    | 0   | 0   | 0    |
| 688800  | 0   | 0   | 0   | 0   | 0   | 0   | 0   | 0    | 0   | 0   | 0    |
| 3013444 | 2   | 2   | 0   | 3   | 1   | 0   | 0   | 0    | 0   | 0   | 0    |
| 174056  | 1   | 2   | 0   | 0   | 0   | 1   | 1   | 0    | 0   | 0   | 1    |
| 583266  | 0   | 0   | 0   | 0   | 0   | 0   | 0   | 0    | 0   | 0   | 0    |
| 180077  | 8   | 1   | 1   | 15  | 14  | 18  | 13  | 27   | 34  | 19  | 13   |
| 813805  | 121 | 17  | 91  | 204 | 607 | 308 | 347 | 662  | 422 | 363 | 436  |
| 381666  | 0   | 0   | 0   | 0   | 0   | 0   | 0   | 0    | 0   | 0   | 0    |
| 4449524 | 0   | 0   | 0   | 3   | 0   | 0   | 0   | 0    | 0   | 1   | 0    |
| 4441792 | 77  | 65  | 5   | 54  | 23  | 21  | 5   | 2    | 45  | 603 | 33   |
| 259006  | 0   | 0   | 0   | 0   | 0   | 0   | 0   | 0    | 0   | 0   | 0    |
| 190114  | 0   | 0   | 0   | 0   | 0   | 0   | 0   | 0    | 0   | 0   | 0    |
| 175227  | 0   | 0   | 0   | 0   | 0   | 0   | 0   | 0    | 0   | 0   | 0    |
| 4464787 | 0   | 0   | 0   | 1   | 0   | 0   | 0   | 0    | 0   | 0   | 0    |
| 4433554 | 0   | 0   | 0   | 0   | 1   | 0   | 0   | 0    | 0   | 0   | 0    |
| 228798  | 6   | 0   | 0   | 0   | 0   | 0   | 0   | 0    | 0   | 0   | 0    |
| 1109929 | 4   | 2   | 0   | 0   | 1   | 0   | 0   | 0    | 0   | 0   | 0    |
| 191098  | 2   | 0   | 0   | 0   | 0   | 0   | 0   | 0    | 0   | 0   | 0    |
| 196664  | 0   | 0   | 0   | 0   | 0   | 0   | 0   | 0    | 0   | 0   | 0    |
| 279026  | 0   | 0   | 0   | 0   | 0   | 0   | 0   | 0    | 0   | 0   | 0    |
| 179958  | 0   | 0   | 0   | 0   | 0   | 0   | 0   | 0    | 0   | 0   | 0    |
| 206324  | 0   | 0   | 0   | 0   | 0   | 0   | 0   | 0    | 1   | 0   | 0    |
| 174071  | 0   | 0   | 0   | 0   | 0   | 0   | 0   | 0    | 0   | 0   | 0    |
| 288128  | 0   | 0   | 0   | 0   | 0   | 0   | 0   | 0    | 0   | 0   | 0    |
| 4453609 | 2   | 0   | 0   | 0   | 0   | 0   | 0   | 0    | 0   | 0   | 0    |
| 356164  | 0   | 0   | 0   | 0   | 0   | 0   | 0   | 0    | 0   | 0   | 0    |
| 577170  | 0   | 0   | 0   | 0   | 0   | 0   | 0   | 0    | 0   | 0   | 0    |
| 185125  | 9   | 0   | 0   | 2   | 0   | 0   | 0   | 3    | 0   | 0   | 0    |
| 185126  | 5   | 1   | 0   | 0   | 1   | 1   | 0   | 0    | 0   | 0   | 0    |

Table S3 A

| ID      | A    | A.1 | A.2 | A.3  | A.4 | A.5 | A.6 | A.7  | A.8 | A.9 | A.10 |
|---------|------|-----|-----|------|-----|-----|-----|------|-----|-----|------|
| 130663  | 0    | 0   | 0   | 1    | 1   | 0   | 0   | 0    | 0   | 0   | 0    |
| 277200  | 4    | 0   | 0   | 0    | 3   | 1   | 0   | 0    | 0   | 0   | 0    |
| 4364243 | 0    | 0   | 0   | 0    | 0   | 0   | 0   | 0    | 0   | 0   | 0    |
| 182470  | 0    | 0   | 0   | 0    | 0   | 0   | 0   | 0    | 0   | 0   | 0    |
| 166718  | 3    | 0   | 0   | 1    | 2   | 0   | 0   | 0    | 1   | 0   | 0    |
| 176008  | 0    | 0   | 0   | 1    | 0   | 0   | 0   | 0    | 0   | 0   | 0    |
| 1106101 | 0    | 0   | 0   | 0    | 0   | 0   | 0   | 3    | 0   | 1   | 0    |
| 584137  | 2    | 1   | 0   | 0    | 0   | 0   | 0   | 0    | 0   | 0   | 0    |
| 268384  | 0    | 0   | 0   | 0    | 26  | 35  | 2   | 4    | 46  | 184 | 46   |
| 332608  | 2    | 0   | 0   | 1    | 3   | 0   | 0   | 0    | 0   | 4   | 0    |
| 303251  | 3    | 4   | 3   | 4    | 0   | 0   | 0   | 0    | 0   | 0   | 0    |
| 214919  | 48   | 1   | 0   | 3    | 21  | 0   | 0   | 0    | 2   | 9   | 2    |
| 267388  | 11   | 1   | 2   | 1    | 1   | 0   | 0   | 0    | 0   | 0   | 1    |
| 187181  | 0    | 0   | 0   | 0    | 0   | 0   | 0   | 0    | 0   | 0   | 0    |
| 228556  | 1609 | 282 | 942 | 1349 | 939 | 548 | 743 | 1071 | 709 | 963 | 868  |
| 129990  | 8    | 1   | 0   | 3    | 12  | 1   | 0   | 5    | 4   | 1   | 0    |
| 271572  | 0    | 0   | 0   | 0    | 0   | 0   | 0   | 0    | 0   | 0   | 0    |
| 3197419 | 0    | 0   | 0   | 0    | 0   | 0   | 0   | 0    | 0   | 0   | 0    |
| 187233  | 3    | 2   | 0   | 4    | 0   | 0   | 0   | 0    | 3   | 0   | 0    |
| 420168  | 0    | 0   | 0   | 0    | 0   | 0   | 0   | 0    | 0   | 0   | 0    |
| 189346  | 0    | 0   | 0   | 0    | 0   | 0   | 0   | 0    | 0   | 0   | 0    |
| 4472195 | 0    | 0   | 0   | 0    | 0   | 0   | 0   | 0    | 0   | 0   | 0    |
| 199137  | 0    | 0   | 0   | 0    | 0   | 0   | 0   | 0    | 0   | 0   | 0    |
| 264294  | 0    | 0   | 0   | 0    | 0   | 0   | 0   | 0    | 0   | 0   | 0    |
| 268844  | 0    | 0   | 0   | 0    | 0   | 0   | 0   | 0    | 0   | 0   | 0    |
| 179427  | 0    | 0   | 0   | 0    | 0   | 0   | 0   | 0    | 4   | 1   | 0    |
| 179426  | 0    | 0   | 0   | 0    | 0   | 0   | 0   | 0    | 0   | 0   | 0    |
| 331411  | 0    | 0   | 0   | 0    | 0   | 0   | 0   | 0    | 0   | 0   | 0    |
| 230268  | 0    | 0   | 0   | 0    | 0   | 1   | 0   | 0    | 0   | 0   | 0    |
| 271439  | 0    | 0   | 0   | 0    | 0   | 0   | 0   | 0    | 0   | 0   | 0    |
| 310760  | 0    | 0   | 0   | 0    | 1   | 0   | 0   | 0    | 0   | 0   | 0    |
| 170335  | 4    | 0   | 0   | 0    | 2   | 1   | 0   | 0    | 0   | 0   | 0    |
| 189476  | 0    | 1   | 0   | 0    | 0   | 0   | 0   | 0    | 0   | 0   | 0    |



Table S3 B. Taconic (T) moms

| ID      | T   | T.1 | T.2  | T.3  | T.4 | T.5  | T.6 | T.7 |
|---------|-----|-----|------|------|-----|------|-----|-----|
| 181348  | 30  | 29  | 73   | 10   | 14  | 20   | 16  | 14  |
| 3957916 | 56  | 33  | 50   | 64   | 25  | 53   | 13  | 71  |
| 244484  | 53  | 52  | 61   | 23   | 14  | 62   | 52  | 25  |
| 1111328 | 165 | 37  | 37   | 35   | 40  | 68   | 80  | 247 |
| 197452  | 7   | 5   | 144  | 182  | 12  | 8    | 0   | 0   |
| 269815  | 85  | 49  | 80   | 39   | 8   | 56   | 76  | 31  |
| 363383  | 0   | 0   | 0    | 0    | 0   | 0    | 0   | 0   |
| 175080  | 4   | 0   | 0    | 0    | 4   | 0    | 0   | 1   |
| 179853  | 67  | 92  | 70   | 33   | 19  | 70   | 27  | 32  |
| 183089  | 0   | 0   | 0    | 0    | 0   | 0    | 0   | 0   |
| 263171  | 15  | 31  | 34   | 244  | 15  | 79   | 86  | 72  |
| 192222  | 19  | 2   | 0    | 0    | 109 | 0    | 0   | 0   |
| 276509  | 4   | 0   | 0    | 0    | 8   | 0    | 0   | 0   |
| 423455  | 0   | 2   | 2    | 0    | 1   | 0    | 0   | 2   |
| 267502  | 12  | 24  | 22   | 32   | 3   | 19   | 1   | 17  |
| 172163  | 4   | 0   | 0    | 0    | 0   | 0    | 0   | 0   |
| 828435  | 3   | 21  | 5    | 46   | 0   | 35   | 6   | 3   |
| 289306  | 59  | 56  | 63   | 35   | 14  | 57   | 72  | 72  |
| 290253  | 357 | 152 | 136  | 80   | 77  | 407  | 376 | 159 |
| 216495  | 39  | 99  | 165  | 142  | 16  | 20   | 110 | 90  |
| 4329450 | 29  | 19  | 16   | 91   | 4   | 56   | 28  | 42  |
| 271418  | 1   | 0   | 1    | 0    | 5   | 0    | 0   | 0   |
| 206817  | 0   | 0   | 0    | 0    | 2   | 0    | 0   | 2   |
| 197891  | 1   | 0   | 0    | 1    | 3   | 0    | 0   | 0   |
| 205134  | 3   | 0   | 0    | 0    | 41  | 0    | 0   | 8   |
| 4352747 | 0   | 0   | 0    | 0    | 18  | 0    | 0   | 0   |
| 182043  | 722 | 916 | 2397 | 1096 | 287 | 1329 | 346 | 966 |
| 274297  | 722 | 630 | 582  | 459  | 150 | 667  | 745 | 706 |
| 197782  | 35  | 20  | 19   | 5    | 9   | 23   | 20  | 23  |
| 1105328 | 11  | 93  | 150  | 202  | 11  | 144  | 44  | 20  |
| 274438  | 101 | 85  | 83   | 63   | 20  | 91   | 83  | 89  |
| 191948  | 0   | 0   | 0    | 0    | 0   | 1    | 0   | 0   |
| 429917  | 1   | 1   | 0    | 0    | 42  | 0    | 0   | 0   |
| 22659   | 63  | 11  | 2    | 14   | 43  | 21   | 19  | 141 |
| 187272  | 0   | 0   | 0    | 0    | 0   | 0    | 0   | 1   |
| 277388  | 228 | 92  | 96   | 70   | 47  | 282  | 248 | 78  |
| 318079  | 0   | 0   | 0    | 0    | 0   | 0    | 0   | 0   |
| 148056  | 0   | 0   | 0    | 0    | 0   | 0    | 0   | 0   |
| 270385  | 41  | 16  | 12   | 12   | 7   | 28   | 26  | 35  |
| 270382  | 0   | 0   | 0    | 0    | 0   | 0    | 0   | 0   |
| 301233  | 62  | 49  | 21   | 241  | 11  | 75   | 35  | 62  |
| 10518   | 0   | 0   | 0    | 0    | 0   | 0    | 0   | 0   |
| 827195  | 2   | 24  | 1    | 7    | 0   | 0    | 12  | 2   |
| 10512   | 0   | 0   | 0    | 0    | 1   | 0    | 0   | 0   |

Table S3 B

| ID      | T   | T.1 | T.2 | T.3 | T.4 | T.5 | T.6 | T.7  |
|---------|-----|-----|-----|-----|-----|-----|-----|------|
| 338640  | 168 | 163 | 198 | 87  | 43  | 163 | 112 | 107  |
| 752584  | 0   | 0   | 0   | 0   | 0   | 0   | 0   | 0    |
| 198998  | 86  | 41  | 39  | 46  | 14  | 122 | 141 | 42   |
| 4357147 | 117 | 180 | 256 | 32  | 53  | 101 | 85  | 42   |
| 196122  | 0   | 1   | 0   | 1   | 0   | 2   | 0   | 0    |
| 839200  | 3   | 1   | 0   | 1   | 0   | 1   | 0   | 2    |
| 4483037 | 47  | 31  | 15  | 34  | 14  | 81  | 14  | 118  |
| 376862  | 9   | 12  | 37  | 64  | 361 | 13  | 17  | 2589 |
| 148671  | 15  | 22  | 20  | 18  | 1   | 23  | 14  | 9    |
| 194504  | 15  | 35  | 32  | 40  | 34  | 20  | 33  | 9    |
| 4442899 | 12  | 6   | 10  | 16  | 2   | 13  | 1   | 15   |
| 278712  | 2   | 0   | 1   | 0   | 3   | 2   | 3   | 1    |
| 4469233 | 576 | 52  | 72  | 6   | 30  | 70  | 58  | 52   |
| 184484  | 1   | 1   | 2   | 1   | 1   | 1   | 0   | 3    |
| 655793  | 206 | 323 | 110 | 105 | 24  | 223 | 166 | 208  |
| 405780  | 0   | 0   | 0   | 0   | 0   | 0   | 0   | 0    |
| 174824  | 2   | 2   | 3   | 20  | 2   | 5   | 4   | 7    |
| 181193  | 60  | 12  | 29  | 109 | 2   | 62  | 53  | 78   |
| 3974550 | 4   | 0   | 1   | 3   | 1   | 0   | 0   | 11   |
| 173916  | 496 | 127 | 345 | 35  | 101 | 323 | 45  | 39   |
| 197623  | 1   | 2   | 1   | 1   | 93  | 2   | 0   | 7    |
| 628218  | 52  | 34  | 69  | 63  | 103 | 22  | 55  | 19   |
| 175706  | 0   | 0   | 0   | 0   | 2   | 0   | 0   | 1    |
| 183106  | 14  | 22  | 60  | 6   | 5   | 1   | 55  | 8    |
| 267958  | 3   | 1   | 3   | 4   | 0   | 2   | 2   | 2    |
| 189288  | 4   | 12  | 8   | 15  | 6   | 25  | 7   | 10   |
| 177621  | 315 | 174 | 63  | 154 | 53  | 191 | 46  | 498  |
| 829240  | 0   | 0   | 0   | 0   | 0   | 0   | 0   | 0    |
| 2645488 | 23  | 34  | 140 | 38  | 1   | 101 | 26  | 4    |
| 186886  | 170 | 50  | 163 | 469 | 100 | 809 | 145 | 115  |
| 210262  | 19  | 3   | 6   | 1   | 1   | 1   | 6   | 3    |
| 271822  | 242 | 113 | 381 | 83  | 41  | 89  | 142 | 77   |
| 196746  | 4   | 2   | 2   | 0   | 0   | 1   | 3   | 0    |
| 179343  | 8   | 22  | 75  | 6   | 2   | 0   | 47  | 9    |
| 4435934 | 3   | 9   | 6   | 7   | 0   | 14  | 5   | 2    |
| 746679  | 0   | 0   | 0   | 0   | 1   | 0   | 0   | 0    |
| 4481506 | 0   | 0   | 0   | 0   | 0   | 0   | 1   | 0    |
| 4357315 | 108 | 59  | 45  | 9   | 39  | 31  | 129 | 31   |
| 452014  | 30  | 26  | 10  | 1   | 15  | 6   | 31  | 13   |
| 68844   | 4   | 5   | 4   | 12  | 1   | 6   | 5   | 8    |
| 272593  | 4   | 1   | 7   | 9   | 3   | 3   | 2   | 5    |
| 182995  | 3   | 1   | 1   | 0   | 316 | 1   | 0   | 15   |
| 4383135 | 10  | 0   | 66  | 155 | 84  | 105 | 9   | 21   |
| 328143  | 2   | 0   | 0   | 0   | 0   | 0   | 0   | 0    |
| 185614  | 6   | 0   | 0   | 0   | 151 | 0   | 0   | 8    |

Table S3 B

| ID      | T   | T.1  | T.2  | T.3 | T.4 | T.5  | T.6  | T.7  |
|---------|-----|------|------|-----|-----|------|------|------|
| 4378081 | 20  | 5    | 0    | 0   | 75  | 0    | 2    | 0    |
| 162539  | 0   | 0    | 0    | 0   | 0   | 0    | 0    | 0    |
| 4459184 | 27  | 8    | 225  | 38  | 22  | 18   | 53   | 13   |
| 586453  | 1   | 7    | 9    | 2   | 2   | 3    | 1    | 12   |
| 827487  | 0   | 0    | 0    | 0   | 2   | 0    | 0    | 0    |
| 184966  | 403 | 104  | 215  | 228 | 172 | 113  | 107  | 42   |
| 209028  | 0   | 0    | 0    | 1   | 1   | 0    | 1    | 0    |
| 197600  | 637 | 530  | 199  | 788 | 477 | 1031 | 394  | 977  |
| 4446120 | 273 | 1087 | 699  | 222 | 126 | 626  | 531  | 76   |
| 356187  | 21  | 13   | 4    | 7   | 1   | 16   | 9    | 3    |
| 1108078 | 109 | 50   | 33   | 12  | 22  | 33   | 24   | 69   |
| 1105589 | 2   | 1    | 2    | 0   | 16  | 0    | 1    | 1    |
| 4342104 | 170 | 315  | 349  | 63  | 88  | 163  | 122  | 73   |
| 180476  | 21  | 24   | 39   | 32  | 4   | 30   | 10   | 24   |
| 4335302 | 78  | 45   | 446  | 51  | 37  | 43   | 20   | 139  |
| 158302  | 908 | 295  | 848  | 128 | 177 | 185  | 2043 | 286  |
| 445144  | 1   | 1    | 0    | 0   | 9   | 0    | 0    | 0    |
| 184753  | 6   | 0    | 0    | 0   | 22  | 0    | 1    | 0    |
| 192712  | 5   | 2    | 0    | 0   | 68  | 0    | 0    | 38   |
| 4414242 | 45  | 21   | 16   | 20  | 11  | 28   | 12   | 104  |
| 255098  | 0   | 0    | 0    | 0   | 0   | 0    | 0    | 1    |
| 173892  | 45  | 44   | 31   | 35  | 16  | 31   | 17   | 26   |
| 4329776 | 24  | 8    | 26   | 12  | 3   | 6    | 9    | 16   |
| 4483585 | 87  | 25   | 32   | 44  | 26  | 10   | 17   | 5    |
| 114111  | 0   | 0    | 0    | 0   | 1   | 0    | 0    | 0    |
| 214715  | 0   | 0    | 0    | 0   | 0   | 0    | 0    | 0    |
| 262159  | 62  | 85   | 67   | 55  | 19  | 136  | 39   | 98   |
| 277364  | 64  | 8    | 1    | 1   | 230 | 0    | 0    | 12   |
| 195433  | 19  | 17   | 23   | 38  | 5   | 20   | 46   | 13   |
| 4449236 | 2   | 0    | 0    | 0   | 170 | 1    | 1    | 26   |
| 269401  | 17  | 19   | 40   | 9   | 3   | 24   | 22   | 6    |
| 261177  | 1   | 1    | 0    | 0   | 12  | 0    | 1    | 3    |
| 261178  | 39  | 72   | 80   | 30  | 10  | 68   | 18   | 21   |
| 190673  | 0   | 0    | 0    | 0   | 3   | 0    | 0    | 0    |
| 176836  | 127 | 127  | 50   | 50  | 12  | 140  | 99   | 90   |
| 188116  | 12  | 4    | 27   | 88  | 6   | 41   | 50   | 95   |
| 234121  | 535 | 2552 | 1205 | 221 | 576 | 1882 | 98   | 18   |
| 144207  | 2   | 0    | 0    | 0   | 1   | 0    | 0    | 2    |
| 188786  | 30  | 13   | 15   | 40  | 1   | 16   | 8    | 17   |
| 196856  | 40  | 18   | 32   | 10  | 13  | 2    | 18   | 152  |
| 214116  | 791 | 385  | 644  | 27  | 203 | 31   | 259  | 913  |
| 265047  | 25  | 84   | 81   | 38  | 5   | 60   | 19   | 24   |
| 415491  | 149 | 101  | 74   | 377 | 44  | 179  | 76   | 120  |
| 4390365 | 0   | 9    | 8    | 10  | 1   | 1    | 8    | 2    |
| 174667  | 539 | 258  | 689  | 327 | 188 | 34   | 330  | 2835 |

Table S3 B

| ID      | T    | T.1  | T.2 | T.3 | T.4 | T.5 | T.6 | T.7 |
|---------|------|------|-----|-----|-----|-----|-----|-----|
| 2901239 | 144  | 242  | 80  | 36  | 77  | 139 | 92  | 57  |
| 273687  | 20   | 26   | 72  | 35  | 16  | 38  | 70  | 35  |
| 319165  | 35   | 20   | 35  | 17  | 5   | 8   | 19  | 84  |
| 269426  | 37   | 22   | 58  | 43  | 9   | 47  | 14  | 16  |
| 270303  | 59   | 49   | 81  | 25  | 11  | 73  | 80  | 25  |
| 329271  | 30   | 15   | 17  | 6   | 1   | 22  | 31  | 4   |
| 198024  | 67   | 43   | 86  | 41  | 11  | 53  | 61  | 27  |
| 896545  | 1    | 0    | 0   | 0   | 215 | 0   | 0   | 11  |
| 263705  | 103  | 35   | 55  | 29  | 26  | 89  | 58  | 58  |
| 174418  | 53   | 87   | 330 | 60  | 67  | 64  | 26  | 50  |
| 174417  | 85   | 32   | 490 | 192 | 23  | 192 | 184 | 75  |
| 184329  | 10   | 0    | 1   | 0   | 229 | 2   | 0   | 9   |
| 192342  | 0    | 0    | 0   | 0   | 0   | 0   | 0   | 0   |
| 4453773 | 0    | 0    | 0   | 0   | 1   | 0   | 0   | 0   |
| 372473  | 0    | 0    | 0   | 0   | 0   | 0   | 0   | 0   |
| 199698  | 21   | 46   | 124 | 32  | 14  | 2   | 76  | 24  |
| 191067  | 90   | 48   | 126 | 59  | 22  | 123 | 29  | 147 |
| 453896  | 2    | 0    | 0   | 0   | 18  | 1   | 0   | 1   |
| 179548  | 0    | 0    | 0   | 0   | 0   | 0   | 1   | 0   |
| 179547  | 1047 | 279  | 336 | 262 | 57  | 648 | 605 | 360 |
| 113978  | 0    | 0    | 0   | 0   | 0   | 0   | 0   | 0   |
| 3449666 | 1    | 0    | 0   | 0   | 32  | 0   | 0   | 0   |
| 4468234 | 4    | 0    | 0   | 0   | 32  | 0   | 0   | 0   |
| 4466275 | 41   | 66   | 45  | 19  | 10  | 34  | 26  | 32  |
| 186742  | 429  | 39   | 50  | 75  | 63  | 281 | 214 | 182 |
| 308332  | 0    | 0    | 18  | 17  | 1   | 59  | 10  | 8   |
| 318819  | 14   | 110  | 44  | 359 | 1   | 350 | 57  | 42  |
| 4379449 | 1    | 4    | 0   | 3   | 0   | 0   | 6   | 2   |
| 105109  | 34   | 2    | 24  | 1   | 0   | 2   | 8   | 3   |
| 261132  | 831  | 1315 | 462 | 433 | 127 | 929 | 655 | 639 |
| 808794  | 5    | 4    | 20  | 48  | 8   | 17  | 4   | 8   |
| 407393  | 1    | 0    | 0   | 0   | 5   | 0   | 1   | 0   |
| 267406  | 47   | 25   | 76  | 25  | 30  | 34  | 6   | 9   |
| 672655  | 11   | 1    | 0   | 0   | 41  | 0   | 1   | 3   |
| 260989  | 63   | 29   | 17  | 27  | 5   | 33  | 30  | 49  |
| 2877100 | 561  | 589  | 504 | 181 | 110 | 328 | 221 | 296 |
| 305787  | 96   | 74   | 36  | 777 | 17  | 248 | 60  | 169 |
| 302641  | 27   | 15   | 17  | 4   | 5   | 36  | 21  | 19  |
| 1992    | 0    | 1    | 0   | 0   | 4   | 0   | 1   | 0   |
| 353073  | 3    | 1    | 1   | 0   | 8   | 0   | 1   | 2   |
| 134762  | 29   | 2    | 0   | 0   | 103 | 0   | 3   | 18  |
| 175646  | 0    | 0    | 3   | 0   | 1   | 0   | 0   | 0   |
| 263518  | 4    | 0    | 0   | 0   | 14  | 0   | 0   | 0   |
| 2137001 | 14   | 1    | 0   | 0   | 98  | 1   | 0   | 0   |
| 3231096 | 3    | 1    | 0   | 0   | 4   | 0   | 1   | 0   |

Table S3 B

| ID      | T    | T.1  | T.2  | T.3   | T.4   | T.5  | T.6  | T.7  |
|---------|------|------|------|-------|-------|------|------|------|
| 176444  | 10   | 0    | 1    | 0     | 102   | 0    | 0    | 2    |
| 261114  | 16   | 4    | 59   | 70    | 4     | 63   | 0    | 145  |
| 191216  | 10   | 1    | 16   | 0     | 2     | 0    | 0    | 7    |
| 191218  | 0    | 0    | 0    | 0     | 0     | 0    | 0    | 0    |
| 167509  | 99   | 61   | 727  | 76    | 70    | 43   | 28   | 262  |
| 175416  | 55   | 115  | 92   | 118   | 52    | 151  | 165  | 202  |
| 183829  | 0    | 0    | 1    | 0     | 0     | 1    | 0    | 0    |
| 4462541 | 155  | 16   | 346  | 7     | 59    | 487  | 5    | 184  |
| 2154095 | 60   | 43   | 91   | 20    | 6     | 72   | 12   | 54   |
| 4416434 | 2040 | 952  | 498  | 15245 | 171   | 5071 | 1407 | 2956 |
| 440840  | 46   | 14   | 48   | 116   | 7     | 90   | 57   | 99   |
| 40798   | 26   | 16   | 7    | 19    | 3     | 16   | 11   | 49   |
| 229452  | 951  | 169  | 125  | 49    | 59    | 245  | 154  | 255  |
| 229455  | 49   | 7    | 7    | 6     | 3     | 10   | 5    | 15   |
| 178480  | 3    | 5    | 7    | 1     | 1     | 1    | 1    | 1    |
| 4454025 | 1    | 0    | 2    | 1     | 28    | 1    | 0    | 1    |
| 4470092 | 2    | 3    | 24   | 54    | 4     | 17   | 5    | 5    |
| 259846  | 151  | 130  | 697  | 1926  | 151   | 672  | 171  | 199  |
| 177068  | 4    | 1    | 1    | 3     | 0     | 3    | 0    | 3    |
| 97263   | 9    | 1    | 26   | 0     | 4     | 0    | 0    | 14   |
| 197099  | 189  | 181  | 133  | 133   | 20    | 233  | 214  | 128  |
| 265976  | 76   | 35   | 74   | 89    | 17    | 91   | 23   | 61   |
| 324999  | 86   | 49   | 35   | 229   | 16    | 116  | 62   | 94   |
| 262677  | 32   | 26   | 23   | 11    | 2     | 21   | 15   | 6    |
| 647320  | 57   | 59   | 87   | 74    | 32    | 94   | 101  | 46   |
| 174573  | 0    | 1    | 0    | 0     | 0     | 0    | 0    | 2    |
| 174571  | 11   | 8    | 32   | 50    | 19    | 37   | 5    | 43   |
| 1571092 | 231  | 28   | 137  | 32    | 131   | 6    | 54   | 20   |
| 177271  | 74   | 178  | 222  | 17    | 39    | 87   | 82   | 26   |
| 4207913 | 0    | 8    | 10   | 0     | 0     | 1    | 4    | 4    |
| 1112121 | 60   | 42   | 70   | 51    | 105   | 22   | 49   | 13   |
| 4334624 | 69   | 15   | 33   | 30    | 8     | 88   | 46   | 56   |
| 390896  | 2    | 7    | 5    | 2     | 4     | 0    | 4    | 2    |
| 129394  | 57   | 17   | 13   | 628   | 165   | 256  | 39   | 38   |
| 2897325 | 0    | 0    | 0    | 0     | 29    | 0    | 0    | 0    |
| 786708  | 0    | 0    | 0    | 0     | 0     | 0    | 0    | 0    |
| 180235  | 85   | 89   | 122  | 77    | 14    | 112  | 103  | 64   |
| 185036  | 0    | 0    | 0    | 0     | 0     | 0    | 0    | 1    |
| 130335  | 124  | 69   | 626  | 358   | 13    | 141  | 337  | 46   |
| 259249  | 3    | 9    | 103  | 9     | 3     | 1    | 69   | 3    |
| 98048   | 599  | 2418 | 1421 | 454   | 219   | 1236 | 784  | 157  |
| 261892  | 2    | 1    | 2    | 1     | 0     | 0    | 0    | 0    |
| 1594231 | 175  | 69   | 1079 | 435   | 40    | 156  | 323  | 51   |
| 4374042 | 3712 | 3662 | 2936 | 1898  | 15407 | 3442 | 8741 | 4561 |
| 204111  | 2    | 0    | 0    | 0     | 26    | 0    | 0    | 0    |

Table S3 B

| ID      | T    | T.1 | T.2  | T.3  | T.4 | T.5  | T.6  | T.7 |
|---------|------|-----|------|------|-----|------|------|-----|
| 274380  | 24   | 18  | 29   | 21   | 9   | 18   | 12   | 26  |
| 176957  | 168  | 212 | 99   | 158  | 20  | 226  | 183  | 254 |
| 198238  | 110  | 86  | 55   | 107  | 7   | 65   | 56   | 61  |
| 1110253 | 707  | 324 | 354  | 150  | 68  | 463  | 525  | 216 |
| 171079  | 27   | 29  | 8    | 12   | 1   | 24   | 32   | 5   |
| 174004  | 4    | 3   | 8    | 0    | 34  | 0    | 3    | 1   |
| 182712  | 365  | 71  | 140  | 91   | 39  | 92   | 30   | 93  |
| 4417539 | 23   | 121 | 3    | 12   | 6   | 17   | 72   | 20  |
| 1107303 | 242  | 26  | 18   | 30   | 32  | 134  | 75   | 89  |
| 310407  | 242  | 61  | 1449 | 574  | 52  | 245  | 552  | 59  |
| 201374  | 0    | 0   | 0    | 0    | 0   | 0    | 0    | 2   |
| 261409  | 4    | 2   | 59   | 59   | 0   | 5    | 0    | 1   |
| 320972  | 510  | 70  | 46   | 4    | 92  | 220  | 145  | 500 |
| 196974  | 11   | 7   | 11   | 22   | 5   | 16   | 14   | 10  |
| 345362  | 0    | 0   | 0    | 0    | 0   | 0    | 0    | 0   |
| 134065  | 1    | 1   | 3    | 0    | 1   | 4    | 0    | 1   |
| 191616  | 131  | 50  | 13   | 77   | 14  | 121  | 73   | 206 |
| 460953  | 0    | 0   | 0    | 0    | 0   | 0    | 0    | 0   |
| 174768  | 263  | 70  | 2327 | 868  | 133 | 774  | 743  | 333 |
| 312322  | 1    | 1   | 2    | 1    | 0   | 0    | 0    | 0   |
| 724472  | 25   | 40  | 14   | 51   | 12  | 41   | 30   | 19  |
| 207749  | 1    | 0   | 0    | 1    | 0   | 0    | 0    | 0   |
| 189730  | 3    | 1   | 0    | 0    | 1   | 0    | 2    | 0   |
| 187841  | 6    | 0   | 1    | 0    | 27  | 2    | 0    | 0   |
| 186073  | 310  | 320 | 289  | 114  | 62  | 208  | 146  | 222 |
| 1087825 | 10   | 0   | 73   | 20   | 0   | 7    | 9    | 2   |
| 47477   | 105  | 140 | 289  | 133  | 26  | 178  | 30   | 86  |
| 4296701 | 31   | 28  | 19   | 6    | 8   | 33   | 67   | 23  |
| 169428  | 28   | 12  | 17   | 20   | 28  | 15   | 5    | 58  |
| 306469  | 1    | 178 | 201  | 92   | 46  | 977  | 11   | 0   |
| 833390  | 25   | 3   | 92   | 43   | 4   | 25   | 27   | 17  |
| 315147  | 0    | 0   | 0    | 0    | 0   | 0    | 0    | 1   |
| 342962  | 1    | 0   | 0    | 0    | 25  | 0    | 0    | 0   |
| 929476  | 0    | 0   | 0    | 0    | 0   | 0    | 0    | 1   |
| 635059  | 85   | 35  | 47   | 1235 | 344 | 440  | 71   | 69  |
| 228310  | 0    | 0   | 0    | 0    | 0   | 0    | 0    | 0   |
| 172705  | 0    | 12  | 4    | 3    | 0   | 4    | 0    | 0   |
| 185177  | 32   | 16  | 24   | 35   | 5   | 61   | 10   | 29  |
| 413996  | 28   | 4   | 1    | 0    | 62  | 2    | 5    | 9   |
| 1106683 | 798  | 632 | 184  | 1288 | 113 | 502  | 342  | 499 |
| 4314257 | 2614 | 757 | 729  | 562  | 213 | 1470 | 1096 | 605 |
| 271013  | 0    | 0   | 0    | 0    | 0   | 0    | 0    | 0   |
| 264101  | 31   | 31  | 30   | 216  | 13  | 99   | 138  | 126 |
| 4402042 | 25   | 16  | 42   | 2    | 3   | 7    | 8    | 9   |
| 72820   | 0    | 0   | 0    | 0    | 0   | 0    | 0    | 0   |

Table S3 B

| ID      | T   | T.1 | T.2  | T.3 | T.4 | T.5 | T.6 | T.7 |
|---------|-----|-----|------|-----|-----|-----|-----|-----|
| 194944  | 27  | 14  | 16   | 16  | 5   | 15  | 13  | 9   |
| 166535  | 1   | 0   | 0    | 0   | 1   | 0   | 0   | 1   |
| 247557  | 9   | 27  | 10   | 7   | 2   | 9   | 7   | 27  |
| 1871    | 51  | 61  | 61   | 35  | 253 | 63  | 168 | 79  |
| 350666  | 276 | 134 | 233  | 188 | 128 | 155 | 74  | 125 |
| 190242  | 25  | 9   | 8    | 14  | 1   | 2   | 15  | 33  |
| 100344  | 0   | 0   | 0    | 0   | 0   | 0   | 0   | 0   |
| 186338  | 4   | 1   | 1    | 0   | 7   | 0   | 0   | 3   |
| 542096  | 415 | 99  | 266  | 585 | 82  | 223 | 62  | 284 |
| 619224  | 50  | 23  | 31   | 24  | 39  | 19  | 9   | 107 |
| 179695  | 23  | 25  | 33   | 20  | 4   | 29  | 15  | 18  |
| 263664  | 0   | 0   | 0    | 0   | 0   | 0   | 0   | 2   |
| 265992  | 7   | 5   | 49   | 56  | 4   | 7   | 1   | 0   |
| 184209  | 25  | 2   | 0    | 2   | 139 | 4   | 2   | 0   |
| 261992  | 29  | 29  | 181  | 62  | 28  | 66  | 202 | 109 |
| 299858  | 143 | 96  | 58   | 126 | 30  | 88  | 30  | 114 |
| 259699  | 140 | 163 | 166  | 92  | 29  | 186 | 203 | 189 |
| 193723  | 0   | 0   | 0    | 0   | 4   | 0   | 0   | 0   |
| 204144  | 0   | 0   | 0    | 0   | 1   | 0   | 0   | 0   |
| 199403  | 0   | 0   | 0    | 2   | 1   | 1   | 0   | 2   |
| 1106468 | 3   | 19  | 46   | 4   | 6   | 6   | 30  | 2   |
| 176760  | 1   | 0   | 0    | 0   | 4   | 0   | 0   | 0   |
| 827592  | 700 | 669 | 1328 | 604 | 177 | 494 | 274 | 415 |
| 416043  | 1   | 0   | 0    | 0   | 0   | 0   | 0   | 1   |
| 258641  | 63  | 106 | 135  | 53  | 17  | 145 | 42  | 48  |
| 36647   | 17  | 14  | 22   | 32  | 5   | 22  | 14  | 24  |
| 258423  | 132 | 41  | 120  | 115 | 30  | 7   | 33  | 19  |
| 258421  | 0   | 0   | 0    | 0   | 0   | 0   | 0   | 0   |
| 186555  | 180 | 113 | 105  | 166 | 34  | 140 | 78  | 106 |
| 306699  | 30  | 17  | 7    | 12  | 5   | 32  | 39  | 15  |
| 335267  | 17  | 18  | 31   | 11  | 3   | 28  | 10  | 19  |
| 771177  | 152 | 65  | 32   | 15  | 25  | 29  | 18  | 34  |
| 204171  | 12  | 24  | 46   | 8   | 8   | 1   | 29  | 4   |
| 299267  | 0   | 0   | 0    | 0   | 0   | 0   | 0   | 0   |
| 264802  | 151 | 73  | 67   | 99  | 57  | 122 | 81  | 101 |
| 4296218 | 0   | 0   | 2    | 0   | 0   | 0   | 0   | 0   |
| 162005  | 15  | 16  | 49   | 6   | 2   | 17  | 43  | 9   |
| 176242  | 6   | 2   | 19   | 9   | 12  | 9   | 26  | 7   |
| 310751  | 1   | 189 | 124  | 76  | 16  | 826 | 6   | 2   |
| 813217  | 0   | 0   | 0    | 0   | 0   | 0   | 0   | 0   |
| 165430  | 2   | 0   | 1    | 0   | 0   | 2   | 0   | 0   |
| 522371  | 1   | 0   | 0    | 0   | 15  | 0   | 0   | 0   |
| 593043  | 2   | 0   | 0    | 0   | 14  | 0   | 0   | 2   |
| 304047  | 48  | 6   | 6    | 0   | 511 | 3   | 4   | 1   |
| 2084364 | 0   | 0   | 0    | 0   | 2   | 1   | 1   | 1   |

Table S3 B

| ID      | T    | T.1  | T.2  | T.3  | T.4  | T.5  | T.6 | T.7  |
|---------|------|------|------|------|------|------|-----|------|
| 313724  | 0    | 1    | 1    | 2    | 1    | 0    | 1   | 0    |
| 2937207 | 3    | 4    | 5    | 1    | 12   | 5    | 10  | 6    |
| 175213  | 155  | 63   | 247  | 106  | 27   | 30   | 114 | 641  |
| 4480555 | 101  | 67   | 21   | 76   | 33   | 168  | 36  | 356  |
| 4480557 | 31   | 142  | 515  | 158  | 53   | 211  | 70  | 19   |
| 175077  | 131  | 143  | 108  | 445  | 40   | 251  | 103 | 129  |
| 188266  | 18   | 19   | 23   | 25   | 1    | 32   | 8   | 14   |
| 259578  | 5109 | 2147 | 3305 | 1306 | 240  | 2156 | 567 | 2466 |
| 177512  | 2    | 1    | 3    | 0    | 95   | 1    | 0   | 2    |
| 3319464 | 0    | 0    | 0    | 0    | 0    | 0    | 0   | 1    |
| 3390534 | 52   | 69   | 71   | 19   | 31   | 41   | 28  | 29   |
| 277067  | 328  | 100  | 346  | 505  | 255  | 291  | 12  | 278  |
| 199674  | 19   | 22   | 41   | 75   | 3    | 39   | 14  | 12   |
| 3920500 | 71   | 18   | 31   | 16   | 10   | 19   | 25  | 23   |
| 265483  | 1    | 0    | 1    | 0    | 0    | 0    | 2   | 1    |
| 399606  | 553  | 358  | 234  | 1724 | 149  | 642  | 348 | 581  |
| 192971  | 0    | 0    | 0    | 0    | 0    | 0    | 0   | 0    |
| 275218  | 197  | 113  | 156  | 88   | 17   | 127  | 139 | 130  |
| 228043  | 56   | 11   | 39   | 22   | 3    | 25   | 12  | 38   |
| 261486  | 70   | 164  | 51   | 39   | 16   | 96   | 93  | 87   |
| 297577  | 90   | 69   | 124  | 157  | 21   | 118  | 78  | 132  |
| 3150250 | 0    | 0    | 0    | 0    | 0    | 0    | 0   | 0    |
| 578016  | 9    | 1    | 0    | 0    | 111  | 0    | 0   | 0    |
| 637546  | 0    | 0    | 0    | 0    | 0    | 0    | 0   | 0    |
| 195691  | 35   | 30   | 37   | 46   | 4    | 113  | 20  | 19   |
| 4483570 | 1    | 0    | 0    | 0    | 4    | 0    | 0   | 0    |
| 4306262 | 159  | 9    | 1    | 5    | 3920 | 17   | 3   | 182  |
| 184451  | 1    | 2    | 14   | 15   | 1    | 36   | 3   | 2    |
| 184456  | 0    | 0    | 0    | 0    | 16   | 0    | 0   | 1    |
| 814952  | 0    | 0    | 0    | 0    | 0    | 0    | 0   | 0    |
| 264225  | 26   | 19   | 47   | 32   | 9    | 35   | 21  | 13   |
| 198865  | 7    | 2    | 13   | 3    | 18   | 0    | 5   | 3    |
| 4405128 | 0    | 0    | 0    | 0    | 0    | 0    | 0   | 0    |
| 3265889 | 3    | 3    | 6    | 9    | 0    | 7    | 1   | 4    |
| 1107652 | 0    | 0    | 0    | 0    | 0    | 0    | 0   | 0    |
| 195337  | 34   | 17   | 28   | 45   | 8    | 1141 | 19  | 99   |
| 196672  | 6    | 1    | 2    | 0    | 57   | 0    | 2   | 4    |
| 269726  | 4    | 1    | 0    | 0    | 0    | 0    | 0   | 0    |
| 179457  | 78   | 402  | 397  | 710  | 36   | 24   | 173 | 198  |
| 637934  | 103  | 91   | 92   | 45   | 63   | 74   | 127 | 68   |
| 262917  | 13   | 2    | 19   | 7    | 3    | 13   | 8   | 6    |
| 1108599 | 0    | 0    | 0    | 0    | 0    | 0    | 0   | 0    |
| 339329  | 67   | 28   | 93   | 131  | 3    | 64   | 19  | 36   |
| 2875735 | 76   | 7    | 1    | 0    | 456  | 6    | 1   | 0    |
| 4402834 | 2    | 98   | 17   | 19   | 2    | 108  | 22  | 20   |



Table S3 B

| ID      | T    | T.1 | T.2 | T.3 | T.4 | T.5 | T.6 | T.7 |
|---------|------|-----|-----|-----|-----|-----|-----|-----|
| 313898  | 33   | 33  | 32  | 31  | 14  | 50  | 23  | 29  |
| 176071  | 3    | 0   | 0   | 0   | 1   | 0   | 0   | 0   |
| 277497  | 52   | 454 | 372 | 258 | 10  | 401 | 135 | 55  |
| 349343  | 0    | 66  | 32  | 48  | 0   | 188 | 38  | 29  |
| 203605  | 44   | 151 | 353 | 85  | 33  | 8   | 228 | 46  |
| 4389125 | 28   | 2   | 0   | 1   | 16  | 0   | 0   | 0   |
| 170926  | 370  | 212 | 200 | 31  | 8   | 156 | 263 | 83  |
| 4448052 | 171  | 92  | 24  | 63  | 30  | 169 | 227 | 132 |
| 174698  | 217  | 147 | 190 | 356 | 34  | 326 | 385 | 168 |
| 332962  | 251  | 196 | 314 | 562 | 90  | 275 | 251 | 422 |
| 3610691 | 0    | 0   | 0   | 0   | 0   | 0   | 0   | 0   |
| 4390754 | 21   | 10  | 33  | 39  | 7   | 25  | 9   | 6   |
| 4457427 | 8    | 9   | 14  | 75  | 5   | 20  | 35  | 28  |
| 320169  | 0    | 0   | 0   | 0   | 5   | 0   | 0   | 0   |
| 265116  | 78   | 21  | 160 | 212 | 26  | 192 | 0   | 363 |
| 269125  | 123  | 58  | 106 | 55  | 148 | 81  | 39  | 376 |
| 4449518 | 0    | 0   | 0   | 0   | 0   | 0   | 0   | 0   |
| 561069  | 46   | 32  | 14  | 25  | 15  | 20  | 6   | 71  |
| 299171  | 152  | 197 | 190 | 40  | 13  | 133 | 55  | 82  |
| 40230   | 14   | 2   | 0   | 0   | 67  | 0   | 1   | 0   |
| 569818  | 63   | 29  | 63  | 54  | 26  | 63  | 16  | 49  |
| 319219  | 137  | 121 | 101 | 127 | 10  | 163 | 71  | 83  |
| 198964  | 47   | 140 | 241 | 72  | 32  | 5   | 194 | 36  |
| 618010  | 0    | 0   | 0   | 0   | 0   | 0   | 0   | 0   |
| 342075  | 31   | 24  | 38  | 25  | 12  | 19  | 35  | 24  |
| 135956  | 10   | 4   | 3   | 3   | 6   | 6   | 4   | 13  |
| 3919797 | 15   | 25  | 12  | 95  | 3   | 114 | 7   | 1   |
| 265301  | 25   | 15  | 29  | 38  | 6   | 33  | 8   | 11  |
| 578058  | 0    | 0   | 0   | 0   | 0   | 0   | 0   | 0   |
| 10196   | 0    | 0   | 0   | 0   | 0   | 0   | 0   | 0   |
| 259511  | 86   | 65  | 62  | 31  | 3   | 148 | 11  | 29  |
| 183619  | 5    | 0   | 0   | 0   | 6   | 0   | 0   | 0   |
| 261076  | 144  | 31  | 131 | 41  | 11  | 40  | 190 | 136 |
| 270391  | 12   | 1   | 0   | 0   | 84  | 0   | 0   | 0   |
| 4440624 | 1150 | 704 | 10  | 604 | 39  | 919 | 286 | 201 |
| 4460604 | 38   | 17  | 24  | 30  | 3   | 39  | 6   | 15  |
| 95424   | 51   | 32  | 17  | 47  | 4   | 49  | 41  | 102 |
| 436341  | 91   | 38  | 61  | 140 | 21  | 89  | 40  | 65  |
| 295075  | 8    | 25  | 16  | 16  | 0   | 14  | 8   | 6   |
| 1678333 | 12   | 28  | 25  | 26  | 9   | 26  | 12  | 16  |
| 243185  | 0    | 0   | 0   | 0   | 0   | 0   | 0   | 0   |
| 175998  | 82   | 57  | 230 | 55  | 35  | 47  | 27  | 91  |
| 3267277 | 0    | 0   | 0   | 0   | 0   | 0   | 0   | 0   |
| 1931575 | 145  | 239 | 232 | 65  | 78  | 84  | 71  | 147 |
| 337784  | 0    | 0   | 0   | 0   | 0   | 0   | 0   | 0   |

Table S3 B

| ID      | T    | T.1  | T.2  | T.3 | T.4 | T.5 | T.6  | T.7  |
|---------|------|------|------|-----|-----|-----|------|------|
| 1921818 | 27   | 41   | 36   | 22  | 5   | 27  | 30   | 14   |
| 3172949 | 205  | 362  | 1233 | 180 | 53  | 36  | 1483 | 151  |
| 3172943 | 0    | 0    | 5    | 0   | 8   | 0   | 0    | 2    |
| 645358  | 1    | 0    | 0    | 0   | 5   | 0   | 0    | 0    |
| 838685  | 43   | 33   | 20   | 13  | 6   | 45  | 32   | 4    |
| 828284  | 0    | 0    | 0    | 0   | 0   | 0   | 0    | 0    |
| 1111755 | 1    | 3    | 1    | 1   | 1   | 2   | 2    | 0    |
| 188878  | 148  | 143  | 162  | 219 | 67  | 251 | 219  | 141  |
| 4401580 | 5    | 0    | 0    | 0   | 2   | 0   | 0    | 0    |
| 317854  | 7    | 1    | 0    | 2   | 3   | 0   | 0    | 11   |
| 4256470 | 0    | 0    | 0    | 0   | 2   | 0   | 0    | 0    |
| 839558  | 1    | 0    | 0    | 0   | 1   | 0   | 0    | 0    |
| 185743  | 107  | 131  | 182  | 77  | 26  | 116 | 77   | 63   |
| 4378740 | 0    | 0    | 0    | 0   | 568 | 0   | 1    | 1    |
| 266206  | 34   | 18   | 47   | 41  | 10  | 44  | 13   | 12   |
| 270513  | 9    | 6    | 53   | 68  | 2   | 12  | 0    | 0    |
| 334697  | 1185 | 238  | 44   | 137 | 611 | 501 | 6    | 1812 |
| 4352471 | 0    | 0    | 0    | 0   | 0   | 0   | 0    | 0    |
| 4426367 | 3    | 0    | 0    | 0   | 3   | 0   | 0    | 0    |
| 209030  | 4    | 1    | 0    | 0   | 6   | 0   | 1    | 0    |
| 190646  | 43   | 29   | 23   | 18  | 6   | 35  | 50   | 49   |
| 172389  | 46   | 32   | 62   | 26  | 10  | 145 | 9    | 10   |
| 213896  | 46   | 27   | 10   | 24  | 5   | 29  | 12   | 87   |
| 161762  | 254  | 248  | 338  | 177 | 47  | 149 | 48   | 206  |
| 174441  | 269  | 1090 | 604  | 199 | 89  | 451 | 308  | 58   |
| 135625  | 71   | 50   | 231  | 63  | 32  | 42  | 26   | 126  |
| 4365109 | 306  | 75   | 23   | 45  | 160 | 136 | 8    | 443  |
| 832558  | 179  | 76   | 34   | 84  | 26  | 175 | 286  | 135  |
| 4464113 | 1    | 4    | 3    | 3   | 1   | 4   | 0    | 1    |
| 1105376 | 0    | 0    | 0    | 0   | 0   | 0   | 0    | 7    |
| 346275  | 45   | 24   | 22   | 29  | 8   | 24  | 7    | 29   |
| 3505032 | 8    | 0    | 0    | 2   | 7   | 0   | 0    | 14   |
| 4355436 | 927  | 76   | 203  | 17  | 45  | 122 | 37   | 623  |
| 4480176 | 137  | 31   | 101  | 58  | 1   | 16  | 22   | 5    |
| 344527  | 90   | 132  | 135  | 104 | 17  | 63  | 33   | 48   |
| 4372003 | 28   | 62   | 116  | 36  | 40  | 18  | 306  | 83   |
| 172464  | 0    | 0    | 0    | 0   | 0   | 0   | 0    | 0    |
| 289709  | 0    | 0    | 0    | 0   | 1   | 0   | 0    | 0    |
| 174854  | 356  | 116  | 207  | 87  | 97  | 304 | 110  | 293  |
| 830014  | 100  | 60   | 100  | 213 | 62  | 77  | 70   | 115  |
| 189666  | 18   | 21   | 12   | 23  | 6   | 31  | 25   | 16   |
| 304416  | 167  | 120  | 106  | 50  | 15  | 117 | 72   | 68   |
| 214835  | 45   | 18   | 20   | 39  | 12  | 51  | 4    | 26   |
| 260346  | 23   | 101  | 102  | 67  | 9   | 90  | 16   | 26   |
| 195445  | 7    | 4    | 19   | 16  | 2   | 17  | 4    | 11   |

Table S3 B

| ID      | T    | T.1  | T.2  | T.3  | T.4   | T.5  | T.6   | T.7   |
|---------|------|------|------|------|-------|------|-------|-------|
| 263420  | 0    | 0    | 0    | 0    | 10    | 0    | 0     | 1     |
| 187959  | 5    | 1    | 13   | 3    | 9     | 0    | 6     | 0     |
| 199707  | 1    | 0    | 0    | 0    | 10    | 0    | 0     | 0     |
| 175485  | 8    | 1    | 0    | 0    | 42    | 0    | 0     | 0     |
| 193064  | 226  | 179  | 124  | 46   | 31    | 129  | 81    | 29    |
| 174285  | 141  | 126  | 1156 | 276  | 155   | 127  | 82    | 973   |
| 1110752 | 6    | 2    | 1    | 0    | 35    | 1    | 2     | 4     |
| 177414  | 2    | 1    | 0    | 0    | 23    | 1    | 0     | 5     |
| 882782  | 1    | 0    | 0    | 0    | 8     | 0    | 0     | 1     |
| 180465  | 19   | 12   | 51   | 35   | 17    | 20   | 1     | 44    |
| 1113553 | 1    | 0    | 0    | 1    | 1     | 0    | 0     | 11    |
| 347490  | 99   | 12   | 98   | 161  | 14    | 94   | 24    | 58    |
| 322991  | 13   | 24   | 141  | 7    | 8     | 1    | 62    | 3     |
| 4327628 | 0    | 0    | 0    | 0    | 0     | 0    | 0     | 0     |
| 819999  | 0    | 0    | 0    | 0    | 0     | 0    | 0     | 0     |
| 4402077 | 745  | 177  | 818  | 10   | 14    | 680  | 15    | 6     |
| 63144   | 3    | 0    | 0    | 0    | 2     | 1    | 1     | 8     |
| 233691  | 390  | 45   | 74   | 113  | 28    | 528  | 3     | 19    |
| 1108453 | 454  | 172  | 830  | 370  | 971   | 477  | 1711  | 671   |
| 38278   | 0    | 0    | 1    | 0    | 1     | 0    | 0     | 0     |
| 181419  | 63   | 54   | 24   | 35   | 9     | 18   | 15    | 39    |
| 183675  | 252  | 798  | 189  | 311  | 84    | 566  | 641   | 1064  |
| 259901  | 104  | 1825 | 1281 | 1478 | 41    | 1081 | 248   | 105   |
| 322839  | 1    | 71   | 0    | 22   | 5     | 0    | 26    | 2     |
| 194388  | 36   | 15   | 15   | 18   | 3     | 20   | 2     | 28    |
| 307416  | 3    | 1    | 5    | 7    | 0     | 14   | 0     | 6     |
| 190063  | 1    | 0    | 6    | 2    | 0     | 18   | 0     | 0     |
| 313274  | 271  | 120  | 158  | 118  | 25    | 434  | 327   | 101   |
| 1136443 | 7770 | 8314 | 7612 | 5052 | 40906 | 9338 | 29510 | 13522 |
| 421893  | 72   | 44   | 45   | 183  | 23    | 87   | 47    | 64    |
| 3325760 | 25   | 29   | 67   | 29   | 8     | 18   | 26    | 20    |
| 343130  | 4    | 6    | 3    | 35   | 1     | 11   | 3     | 6     |
| 174260  | 16   | 21   | 12   | 22   | 7     | 23   | 29    | 46    |
| 4453627 | 23   | 346  | 188  | 241  | 10    | 192  | 42    | 31    |
| 348785  | 25   | 14   | 28   | 155  | 27    | 81   | 39    | 35    |
| 189789  | 96   | 21   | 26   | 23   | 9     | 18   | 5     | 80    |
| 3056461 | 2    | 16   | 10   | 6    | 3     | 3    | 4     | 11    |
| 188785  | 0    | 0    | 0    | 0    | 0     | 0    | 0     | 0     |
| 354736  | 224  | 218  | 213  | 265  | 104   | 353  | 347   | 218   |
| 263953  | 64   | 35   | 23   | 33   | 11    | 37   | 12    | 29    |
| 635304  | 0    | 0    | 0    | 0    | 0     | 0    | 0     | 0     |
| 309663  | 51   | 16   | 21   | 281  | 5     | 136  | 14    | 58    |
| 198604  | 7    | 21   | 46   | 6    | 3     | 0    | 59    | 5     |
| 205160  | 1    | 0    | 0    | 0    | 6     | 0    | 1     | 4     |
| 264657  | 7    | 1    | 0    | 0    | 9     | 0    | 2     | 3     |

Table S3 B

| ID      | T   | T.1  | T.2  | T.3  | T.4 | T.5  | T.6  | T.7  |
|---------|-----|------|------|------|-----|------|------|------|
| 273928  | 18  | 15   | 19   | 7    | 2   | 21   | 27   | 13   |
| 197025  | 0   | 0    | 0    | 0    | 0   | 2    | 0    | 0    |
| 157999  | 38  | 25   | 147  | 375  | 42  | 148  | 27   | 41   |
| 385545  | 173 | 116  | 112  | 766  | 102 | 263  | 119  | 215  |
| 186777  | 277 | 164  | 4    | 131  | 8   | 170  | 55   | 76   |
| 30067   | 73  | 49   | 79   | 56   | 33  | 73   | 114  | 73   |
| 177205  | 6   | 0    | 0    | 0    | 12  | 0    | 1    | 1    |
| 4401375 | 23  | 60   | 109  | 62   | 15  | 10   | 69   | 42   |
| 176139  | 68  | 46   | 63   | 41   | 6   | 34   | 9    | 39   |
| 3998912 | 12  | 1    | 36   | 0    | 0   | 0    | 442  | 18   |
| 175114  | 42  | 13   | 48   | 21   | 48  | 30   | 84   | 23   |
| 176868  | 143 | 56   | 70   | 31   | 15  | 60   | 81   | 45   |
| 191878  | 1   | 2    | 0    | 0    | 0   | 1    | 1    | 1    |
| 259195  | 90  | 91   | 84   | 35   | 13  | 56   | 61   | 19   |
| 174791  | 1   | 0    | 0    | 0    | 8   | 0    | 0    | 0    |
| 2624257 | 3   | 0    | 1    | 0    | 19  | 0    | 0    | 0    |
| 271734  | 0   | 1    | 0    | 0    | 0   | 4    | 0    | 0    |
| 174420  | 0   | 0    | 0    | 0    | 0   | 0    | 0    | 0    |
| 1517779 | 3   | 0    | 2    | 0    | 24  | 0    | 1    | 1    |
| 1108378 | 95  | 145  | 110  | 51   | 21  | 115  | 51   | 44   |
| 319816  | 48  | 18   | 25   | 36   | 21  | 28   | 17   | 12   |
| 606063  | 0   | 0    | 0    | 0    | 0   | 0    | 0    | 0    |
| 4420272 | 35  | 35   | 184  | 415  | 40  | 158  | 28   | 43   |
| 266091  | 66  | 30   | 36   | 53   | 15  | 32   | 8    | 37   |
| 177014  | 4   | 0    | 0    | 0    | 52  | 0    | 0    | 23   |
| 2978254 | 112 | 53   | 102  | 42   | 8   | 74   | 20   | 72   |
| 51677   | 145 | 417  | 1193 | 96   | 345 | 110  | 388  | 301  |
| 345211  | 69  | 32   | 100  | 45   | 20  | 56   | 23   | 23   |
| 4476330 | 72  | 167  | 180  | 57   | 32  | 148  | 21   | 210  |
| 113417  | 0   | 0    | 0    | 0    | 9   | 0    | 0    | 0    |
| 174651  | 5   | 16   | 19   | 20   | 2   | 8    | 60   | 80   |
| 263366  | 5   | 20   | 14   | 51   | 1   | 24   | 4    | 8    |
| 178068  | 0   | 0    | 1    | 0    | 27  | 0    | 0    | 4    |
| 273904  | 14  | 11   | 94   | 145  | 8   | 14   | 1    | 2    |
| 258559  | 220 | 369  | 397  | 2603 | 303 | 779  | 1092 | 1167 |
| 2315700 | 18  | 52   | 29   | 107  | 41  | 43   | 14   | 46   |
| 4418586 | 9   | 2547 | 127  | 192  | 21  | 3659 | 676  | 654  |
| 276629  | 1   | 0    | 0    | 0    | 1   | 0    | 0    | 0    |
| 4424327 | 7   | 3    | 34   | 136  | 62  | 80   | 6    | 22   |
| 831301  | 0   | 0    | 0    | 0    | 0   | 0    | 0    | 0    |
| 190026  | 0   | 0    | 0    | 0    | 0   | 0    | 0    | 0    |
| 4476780 | 15  | 68   | 97   | 35   | 9   | 18   | 45   | 66   |
| 570367  | 78  | 33   | 85   | 65   | 29  | 61   | 42   | 59   |
| 210950  | 0   | 0    | 0    | 0    | 8   | 0    | 0    | 0    |
| 4366524 | 155 | 23   | 65   | 13   | 29  | 20   | 21   | 55   |

Table S3 B

| ID      | T    | T.1  | T.2 | T.3  | T.4 | T.5  | T.6  | T.7  |
|---------|------|------|-----|------|-----|------|------|------|
| 272192  | 73   | 74   | 48  | 28   | 14  | 96   | 179  | 83   |
| 136604  | 127  | 21   | 4   | 76   | 14  | 23   | 14   | 14   |
| 192316  | 1    | 1    | 0   | 0    | 14  | 1    | 0    | 5    |
| 2072645 | 0    | 0    | 0   | 0    | 1   | 0    | 0    | 0    |
| 181719  | 0    | 0    | 0   | 0    | 0   | 0    | 0    | 0    |
| 292892  | 34   | 12   | 44  | 71   | 4   | 61   | 3    | 32   |
| 340600  | 23   | 11   | 15  | 11   | 5   | 21   | 14   | 30   |
| 261590  | 0    | 0    | 0   | 0    | 0   | 0    | 0    | 0    |
| 168984  | 0    | 0    | 1   | 0    | 0   | 8    | 0    | 0    |
| 1703712 | 0    | 0    | 1   | 0    | 0   | 0    | 0    | 1    |
| 264345  | 0    | 0    | 0   | 0    | 0   | 0    | 0    | 0    |
| 209845  | 13   | 15   | 11  | 37   | 10  | 9    | 32   | 23   |
| 198209  | 0    | 0    | 0   | 0    | 0   | 0    | 0    | 0    |
| 171532  | 23   | 16   | 3   | 0    | 0   | 34   | 1    | 5    |
| 299600  | 9    | 7    | 11  | 31   | 3   | 9    | 19   | 11   |
| 273967  | 151  | 136  | 24  | 301  | 21  | 292  | 206  | 157  |
| 4449984 | 0    | 0    | 0   | 0    | 0   | 0    | 0    | 1    |
| 325850  | 6    | 0    | 0   | 0    | 14  | 0    | 0    | 0    |
| 801260  | 4    | 0    | 1   | 0    | 104 | 0    | 0    | 2    |
| 259631  | 54   | 31   | 41  | 91   | 11  | 100  | 25   | 54   |
| 278609  | 1657 | 850  | 525 | 446  | 361 | 1705 | 1800 | 874  |
| 264155  | 32   | 23   | 61  | 13   | 41  | 26   | 134  | 29   |
| 333576  | 1    | 1    | 3   | 11   | 0   | 7    | 1    | 1    |
| 194665  | 3    | 1    | 3   | 0    | 1   | 4    | 3    | 1    |
| 194662  | 77   | 130  | 47  | 29   | 9   | 101  | 64   | 76   |
| 2897332 | 31   | 15   | 3   | 35   | 8   | 32   | 3    | 21   |
| 178490  | 52   | 97   | 54  | 71   | 18  | 88   | 31   | 42   |
| 262801  | 2930 | 2522 | 632 | 5190 | 347 | 2136 | 1536 | 2442 |
| 4471130 | 13   | 18   | 56  | 60   | 0   | 49   | 147  | 33   |
| 4471135 | 52   | 68   | 40  | 30   | 7   | 38   | 19   | 14   |
| 259275  | 27   | 14   | 13  | 9    | 3   | 26   | 31   | 15   |
| 198194  | 24   | 20   | 17  | 7    | 2   | 14   | 51   | 17   |
| 575261  | 33   | 22   | 31  | 47   | 7   | 27   | 8    | 30   |
| 258849  | 1    | 0    | 1   | 0    | 5   | 0    | 0    | 1    |
| 4045882 | 3    | 0    | 0   | 0    | 62  | 1    | 0    | 3    |
| 177917  | 4    | 18   | 27  | 4    | 3   | 1    | 32   | 2    |
| 298973  | 62   | 34   | 20  | 52   | 9   | 34   | 8    | 47   |
| 835456  | 1    | 0    | 0   | 0    | 0   | 0    | 0    | 0    |
| 276663  | 13   | 35   | 14  | 23   | 5   | 19   | 13   | 4    |
| 3868285 | 1743 | 504  | 837 | 5813 | 172 | 3210 | 5032 | 4585 |
| 276484  | 61   | 120  | 418 | 192  | 57  | 31   | 378  | 103  |
| 192598  | 218  | 41   | 203 | 127  | 75  | 156  | 131  | 81   |
| 4343528 | 286  | 102  | 305 | 32   | 43  | 1441 | 712  | 47   |
| 260233  | 40   | 28   | 100 | 133  | 46  | 88   | 219  | 59   |
| 174770  | 252  | 66   | 130 | 122  | 6   | 224  | 139  | 61   |

Table S3 B

| ID      | T    | T.1 | T.2 | T.3  | T.4 | T.5 | T.6 | T.7 |
|---------|------|-----|-----|------|-----|-----|-----|-----|
| 272953  | 21   | 17  | 14  | 14   | 3   | 33  | 26  | 23  |
| 176886  | 0    | 1   | 7   | 2    | 2   | 0   | 3   | 0   |
| 4466618 | 0    | 0   | 0   | 0    | 0   | 0   | 0   | 0   |
| 259870  | 92   | 71  | 94  | 10   | 68  | 70  | 25  | 358 |
| 4450025 | 88   | 28  | 351 | 229  | 18  | 90  | 127 | 36  |
| 661055  | 98   | 12  | 140 | 24   | 31  | 6   | 29  | 40  |
| 210292  | 1118 | 618 | 554 | 315  | 187 | 555 | 964 | 838 |
| 166099  | 22   | 5   | 8   | 3    | 1   | 2   | 3   | 5   |
| 345582  | 22   | 22  | 41  | 15   | 5   | 40  | 35  | 10  |
| 261334  | 59   | 46  | 50  | 44   | 6   | 44  | 18  | 15  |
| 136783  | 86   | 62  | 307 | 88   | 57  | 45  | 26  | 251 |
| 314424  | 807  | 253 | 329 | 509  | 161 | 525 | 50  | 562 |
| 771140  | 181  | 62  | 80  | 2503 | 701 | 793 | 156 | 140 |
| 177930  | 42   | 13  | 16  | 261  | 6   | 72  | 27  | 49  |
| 274095  | 23   | 9   | 14  | 6    | 8   | 20  | 16  | 7   |
| 185519  | 5    | 46  | 103 | 21   | 9   | 55  | 13  | 24  |
| 162639  | 6    | 0   | 0   | 0    | 46  | 0   | 0   | 1   |
| 578649  | 67   | 33  | 61  | 91   | 14  | 54  | 26  | 65  |
| 312311  | 125  | 58  | 132 | 80   | 37  | 44  | 85  | 372 |
| 569522  | 403  | 190 | 397 | 421  | 142 | 345 | 97  | 338 |
| 2212505 | 7    | 1   | 0   | 0    | 217 | 0   | 1   | 15  |
| 214120  | 1    | 0   | 0   | 0    | 2   | 0   | 0   | 1   |
| 258411  | 179  | 438 | 354 | 397  | 37  | 351 | 354 | 129 |
| 4371295 | 0    | 0   | 0   | 0    | 0   | 0   | 0   | 0   |
| 2797565 | 2    | 1   | 5   | 2    | 8   | 2   | 3   | 2   |
| 1991255 | 38   | 41  | 38  | 16   | 18  | 49  | 11  | 28  |
| 261350  | 15   | 1   | 0   | 0    | 19  | 0   | 1   | 13  |
| 14035   | 34   | 5   | 3   | 5    | 9   | 1   | 0   | 1   |
| 264325  | 0    | 0   | 0   | 0    | 0   | 0   | 0   | 0   |
| 437137  | 1    | 1   | 0   | 0    | 7   | 0   | 0   | 7   |
| 4481359 | 78   | 85  | 46  | 66   | 48  | 72  | 80  | 301 |
| 112720  | 0    | 0   | 1   | 0    | 3   | 0   | 1   | 0   |
| 311788  | 13   | 2   | 0   | 0    | 44  | 0   | 1   | 7   |
| 833381  | 15   | 9   | 21  | 28   | 7   | 20  | 16  | 19  |
| 177952  | 236  | 179 | 167 | 143  | 61  | 125 | 137 | 149 |
| 4483264 | 50   | 56  | 43  | 23   | 11  | 37  | 37  | 29  |
| 310781  | 0    | 0   | 0   | 0    | 0   | 0   | 0   | 0   |
| 4477372 | 8    | 13  | 19  | 90   | 2   | 22  | 17  | 27  |
| 342685  | 0    | 0   | 0   | 0    | 0   | 0   | 0   | 0   |
| 4413888 | 1    | 0   | 3   | 0    | 0   | 3   | 0   | 1   |
| 273091  | 5    | 2   | 0   | 4    | 3   | 0   | 0   | 0   |
| 324013  | 2    | 0   | 0   | 0    | 5   | 0   | 0   | 0   |
| 177371  | 5    | 0   | 2   | 0    | 230 | 0   | 1   | 14  |
| 4393892 | 1    | 3   | 4   | 4    | 0   | 2   | 0   | 4   |
| 4378477 | 3    | 1   | 1   | 4    | 3   | 1   | 0   | 24  |

Table S3 B

| ID      | T   | T.1 | T.2 | T.3 | T.4  | T.5 | T.6 | T.7 |
|---------|-----|-----|-----|-----|------|-----|-----|-----|
| 4327763 | 83  | 36  | 49  | 47  | 17   | 59  | 27  | 72  |
| 1902400 | 56  | 31  | 32  | 317 | 11   | 125 | 36  | 87  |
| 181091  | 24  | 15  | 131 | 83  | 11   | 81  | 11  | 34  |
| 4384058 | 0   | 0   | 0   | 0   | 0    | 0   | 0   | 0   |
| 1112373 | 0   | 5   | 10  | 5   | 2    | 0   | 2   | 4   |
| 180879  | 896 | 466 | 406 | 302 | 141  | 860 | 451 | 270 |
| 356226  | 0   | 0   | 0   | 0   | 5    | 0   | 0   | 0   |
| 197706  | 80  | 39  | 29  | 51  | 9    | 63  | 12  | 90  |
| 264468  | 2   | 1   | 2   | 0   | 1    | 2   | 1   | 0   |
| 186549  | 81  | 50  | 18  | 25  | 22   | 35  | 15  | 158 |
| 185550  | 13  | 2   | 0   | 0   | 81   | 0   | 0   | 5   |
| 177748  | 63  | 64  | 40  | 65  | 7    | 182 | 28  | 25  |
| 189309  | 17  | 2   | 33  | 0   | 10   | 0   | 0   | 15  |
| 688800  | 90  | 15  | 66  | 24  | 25   | 39  | 44  | 34  |
| 3013444 | 0   | 0   | 0   | 0   | 1    | 0   | 0   | 0   |
| 174056  | 1   | 0   | 1   | 0   | 11   | 1   | 0   | 1   |
| 583266  | 94  | 67  | 122 | 260 | 27   | 152 | 74  | 79  |
| 180077  | 56  | 1   | 3   | 1   | 1950 | 8   | 2   | 87  |
| 813805  | 0   | 0   | 0   | 0   | 0    | 0   | 0   | 0   |
| 381666  | 7   | 3   | 0   | 0   | 4    | 0   | 0   | 1   |
| 4449524 | 0   | 0   | 0   | 0   | 0    | 0   | 0   | 0   |
| 4441792 | 6   | 1   | 1   | 4   | 5    | 4   | 5   | 11  |
| 259006  | 38  | 18  | 15  | 27  | 2    | 15  | 8   | 19  |
| 190114  | 3   | 3   | 9   | 4   | 0    | 4   | 2   | 3   |
| 175227  | 13  | 11  | 20  | 20  | 12   | 26  | 21  | 24  |
| 4464787 | 160 | 53  | 10  | 550 | 8    | 153 | 69  | 29  |
| 4433554 | 0   | 0   | 0   | 0   | 0    | 0   | 0   | 0   |
| 228798  | 1   | 1   | 3   | 0   | 0    | 0   | 4   | 0   |
| 1109929 | 271 | 422 | 246 | 212 | 30   | 328 | 116 | 218 |
| 191098  | 76  | 88  | 45  | 108 | 24   | 137 | 70  | 53  |
| 196664  | 0   | 4   | 8   | 0   | 3    | 0   | 5   | 0   |
| 279026  | 23  | 83  | 30  | 47  | 7    | 38  | 23  | 17  |
| 179958  | 0   | 0   | 0   | 0   | 0    | 0   | 0   | 0   |
| 206324  | 2   | 0   | 0   | 0   | 5    | 0   | 0   | 0   |
| 174071  | 27  | 29  | 31  | 86  | 9    | 44  | 60  | 65  |
| 288128  | 55  | 40  | 37  | 26  | 3    | 41  | 45  | 46  |
| 4453609 | 0   | 0   | 1   | 0   | 10   | 0   | 0   | 0   |
| 356164  | 2   | 1   | 3   | 0   | 31   | 0   | 1   | 0   |
| 577170  | 8   | 1   | 0   | 0   | 41   | 0   | 1   | 1   |
| 185125  | 424 | 233 | 229 | 302 | 89   | 366 | 439 | 550 |
| 185126  | 0   | 1   | 24  | 16  | 2    | 68  | 5   | 11  |
| 130663  | 5   | 0   | 0   | 0   | 2    | 0   | 0   | 0   |
| 277200  | 81  | 72  | 70  | 72  | 27   | 92  | 55  | 63  |
| 4364243 | 4   | 2   | 2   | 0   | 0    | 2   | 1   | 1   |
| 182470  | 78  | 24  | 32  | 25  | 6    | 23  | 8   | 35  |

Table S3 B

| ID      | T    | T.1 | T.2  | T.3 | T.4 | T.5  | T.6  | T.7  |
|---------|------|-----|------|-----|-----|------|------|------|
| 166718  | 1    | 0   | 0    | 0   | 0   | 0    | 0    | 1    |
| 176008  | 82   | 72  | 80   | 209 | 19  | 132  | 63   | 76   |
| 1106101 | 9    | 1   | 0    | 0   | 178 | 1    | 0    | 6    |
| 584137  | 17   | 16  | 15   | 5   | 2   | 9    | 4    | 14   |
| 268384  | 6    | 1   | 0    | 1   | 5   | 1    | 2    | 15   |
| 332608  | 493  | 202 | 232  | 50  | 157 | 196  | 683  | 99   |
| 303251  | 0    | 0   | 0    | 0   | 0   | 0    | 0    | 0    |
| 214919  | 0    | 0   | 0    | 0   | 2   | 5    | 0    | 0    |
| 267388  | 5    | 326 | 401  | 185 | 122 | 2064 | 25   | 6    |
| 187181  | 108  | 287 | 22   | 65  | 37  | 70   | 133  | 50   |
| 228556  | 0    | 0   | 0    | 0   | 0   | 0    | 0    | 0    |
| 129990  | 36   | 4   | 0    | 1   | 63  | 2    | 0    | 8    |
| 271572  | 40   | 50  | 25   | 477 | 9   | 161  | 112  | 72   |
| 3197419 | 9    | 7   | 41   | 29  | 3   | 10   | 47   | 15   |
| 187233  | 3    | 9   | 20   | 8   | 11  | 8    | 1    | 13   |
| 420168  | 36   | 29  | 18   | 5   | 8   | 38   | 59   | 20   |
| 189346  | 116  | 162 | 61   | 196 | 7   | 196  | 78   | 119  |
| 4472195 | 194  | 160 | 141  | 108 | 60  | 125  | 112  | 147  |
| 199137  | 13   | 17  | 22   | 18  | 8   | 21   | 15   | 11   |
| 264294  | 70   | 31  | 78   | 112 | 20  | 37   | 14   | 65   |
| 268844  | 39   | 53  | 55   | 422 | 11  | 310  | 105  | 47   |
| 179427  | 7    | 0   | 0    | 0   | 98  | 0    | 1    | 4    |
| 179426  | 78   | 30  | 30   | 44  | 12  | 55   | 20   | 23   |
| 331411  | 8    | 3   | 1    | 6   | 1   | 14   | 1    | 2    |
| 230268  | 466  | 402 | 135  | 232 | 57  | 210  | 251  | 158  |
| 271439  | 78   | 39  | 71   | 152 | 12  | 104  | 82   | 89   |
| 310760  | 18   | 8   | 15   | 8   | 7   | 4    | 6    | 56   |
| 170335  | 0    | 0   | 0    | 0   | 0   | 0    | 0    | 0    |
| 189476  | 1463 | 726 | 2384 | 435 | 640 | 462  | 1204 | 1445 |



Table S3 C. Rederived (R) *HBUS* mice

| ID      | R   | R.1 | R.2  | R.3  | R.4 | R.5 | R.6 | R.7 | R.8 | R.9 | R.10 | R.11 | R.12 |
|---------|-----|-----|------|------|-----|-----|-----|-----|-----|-----|------|------|------|
| 181348  | 4   | 5   | 1    | 11   | 0   | 1   | 0   | 0   | 14  | 3   | 4    | 15   | 2    |
| 3957916 | 13  | 10  | 24   | 19   | 6   | 1   | 7   | 6   | 81  | 47  | 5    | 24   | 90   |
| 244484  | 15  | 8   | 6    | 27   | 9   | 26  | 29  | 4   | 45  | 6   | 16   | 12   | 31   |
| 1111328 | 0   | 0   | 0    | 0    | 0   | 0   | 0   | 11  | 12  | 41  | 0    | 9    | 19   |
| 197452  | 21  | 6   | 6    | 171  | 4   | 39  | 50  | 30  | 42  | 2   | 1    | 32   | 120  |
| 269815  | 50  | 2   | 0    | 9    | 3   | 5   | 8   | 1   | 19  | 2   | 6    | 4    | 13   |
| 363383  | 0   | 0   | 0    | 0    | 0   | 0   | 0   | 0   | 0   | 0   | 0    | 0    | 0    |
| 175080  | 46  | 32  | 112  | 29   | 37  | 23  | 12  | 21  | 0   | 53  | 1    | 0    | 2    |
| 179853  | 0   | 3   | 3    | 3    | 2   | 0   | 0   | 0   | 0   | 0   | 6    | 7    | 2    |
| 183089  | 0   | 38  | 10   | 54   | 3   | 11  | 8   | 5   | 33  | 16  | 4    | 1    | 0    |
| 263171  | 63  | 0   | 0    | 9    | 13  | 19  | 24  | 1   | 0   | 0   | 3    | 3    | 1    |
| 192222  | 0   | 0   | 0    | 0    | 0   | 0   | 0   | 0   | 0   | 0   | 0    | 0    | 0    |
| 276509  | 33  | 8   | 36   | 5    | 19  | 16  | 20  | 24  | 125 | 10  | 16   | 18   | 27   |
| 423455  | 8   | 14  | 35   | 29   | 25  | 12  | 13  | 5   | 35  | 10  | 18   | 2    | 16   |
| 267502  | 0   | 0   | 0    | 0    | 0   | 0   | 0   | 2   | 0   | 0   | 2    | 1    | 0    |
| 172163  | 440 | 429 | 1268 | 1366 | 79  | 8   | 1   | 48  | 62  | 0   | 0    | 115  | 24   |
| 828435  | 51  | 15  | 0    | 3    | 1   | 3   | 3   | 4   | 0   | 7   | 14   | 1    | 12   |
| 289306  | 45  | 22  | 9    | 27   | 11  | 12  | 22  | 2   | 19  | 3   | 9    | 17   | 30   |
| 290253  | 141 | 68  | 185  | 154  | 52  | 118 | 84  | 21  | 347 | 31  | 50   | 27   | 65   |
| 216495  | 12  | 2   | 6    | 5    | 7   | 5   | 3   | 11  | 12  | 1   | 4    | 5    | 9    |
| 4329450 | 60  | 5   | 2    | 16   | 1   | 6   | 8   | 0   | 6   | 2   | 3    | 4    | 6    |
| 271418  | 7   | 9   | 46   | 36   | 21  | 24  | 36  | 51  | 85  | 7   | 5    | 6    | 135  |
| 206817  | 11  | 3   | 29   | 11   | 13  | 9   | 4   | 40  | 16  | 7   | 12   | 13   | 20   |
| 197891  | 28  | 6   | 22   | 13   | 17  | 10  | 4   | 6   | 52  | 5   | 5    | 15   | 17   |
| 205134  | 236 | 237 | 361  | 459  | 158 | 61  | 51  | 114 | 313 | 42  | 54   | 86   | 95   |
| 4352747 | 4   | 13  | 13   | 17   | 2   | 4   | 8   | 25  | 4   | 2   | 2    | 11   | 14   |
| 182043  | 0   | 0   | 0    | 0    | 47  | 27  | 22  | 10  | 2   | 1   | 1    | 4    | 1    |
| 274297  | 377 | 139 | 118  | 230  | 53  | 127 | 176 | 42  | 177 | 65  | 109  | 151  | 228  |
| 197782  | 16  | 5   | 4    | 13   | 6   | 0   | 4   | 2   | 1   | 3   | 2    | 8    | 3    |
| 1105328 | 8   | 1   | 10   | 55   | 3   | 1   | 3   | 0   | 0   | 2   | 0    | 1    | 4    |
| 274438  | 95  | 24  | 27   | 49   | 23  | 11  | 22  | 5   | 16  | 9   | 11   | 21   | 46   |
| 191948  | 0   | 0   | 0    | 0    | 0   | 0   | 0   | 0   | 0   | 2   | 0    | 0    | 5    |
| 429917  | 1   | 0   | 2    | 0    | 0   | 1   | 1   | 1   | 6   | 1   | 1    | 4    | 2    |
| 22659   | 4   | 281 | 35   | 784  | 46  | 41  | 40  | 11  | 40  | 1   | 11   | 28   | 20   |
| 187272  | 0   | 0   | 8    | 24   | 0   | 7   | 6   | 34  | 0   | 0   | 0    | 2    | 1    |
| 277388  | 72  | 60  | 121  | 90   | 31  | 59  | 47  | 18  | 231 | 29  | 38   | 13   | 43   |
| 318079  | 2   | 87  | 27   | 123  | 6   | 9   | 5   | 0   | 16  | 9   | 1    | 0    | 0    |
| 148056  | 0   | 0   | 0    | 0    | 0   | 0   | 0   | 0   | 0   | 0   | 0    | 0    | 0    |
| 270385  | 1   | 0   | 0    | 1    | 0   | 2   | 4   | 0   | 0   | 4   | 1    | 5    | 8    |
| 270382  | 2   | 115 | 28   | 52   | 7   | 25  | 35  | 6   | 27  | 8   | 1    | 5    | 1    |
| 301233  | 31  | 1   | 0    | 6    | 1   | 11  | 20  | 2   | 22  | 0   | 24   | 8    | 1    |
| 10518   | 36  | 65  | 16   | 38   | 8   | 2   | 8   | 0   | 0   | 38  | 9    | 7    | 0    |
| 827195  | 10  | 138 | 205  | 123  | 14  | 19  | 7   | 6   | 124 | 149 | 2    | 6    | 204  |
| 10512   | 0   | 0   | 0    | 0    | 0   | 0   | 0   | 0   | 0   | 0   | 0    | 0    | 0    |

Table S3 C

| ID      | R   | R.1 | R.2 | R.3 | R.4  | R.5 | R.6 | R.7 | R.8  | R.9 | R.10 | R.11 | R.12 |
|---------|-----|-----|-----|-----|------|-----|-----|-----|------|-----|------|------|------|
| 338640  | 44  | 12  | 7   | 5   | 2    | 38  | 19  | 13  | 18   | 14  | 113  | 29   | 15   |
| 752584  | 0   | 0   | 0   | 0   | 0    | 0   | 0   | 0   | 0    | 0   | 0    | 0    | 0    |
| 198998  | 92  | 3   | 11  | 22  | 8    | 22  | 22  | 4   | 33   | 5   | 35   | 6    | 6    |
| 4357147 | 178 | 279 | 100 | 213 | 72   | 655 | 67  | 204 | 25   | 87  | 398  | 238  | 141  |
| 196122  | 1   | 0   | 0   | 0   | 0    | 0   | 0   | 1   | 0    | 0   | 0    | 1    | 3    |
| 839200  | 0   | 0   | 0   | 0   | 0    | 0   | 0   | 0   | 4    | 0   | 1    | 0    | 1    |
| 4483037 | 481 | 207 | 60  | 307 | 111  | 64  | 210 | 102 | 21   | 121 | 318  | 134  | 49   |
| 376862  | 5   | 23  | 18  | 26  | 0    | 6   | 20  | 10  | 22   | 11  | 11   | 18   | 5    |
| 148671  | 20  | 4   | 3   | 10  | 1    | 6   | 0   | 10  | 2    | 2   | 1    | 3    | 6    |
| 194504  | 35  | 0   | 1   | 0   | 0    | 0   | 0   | 0   | 61   | 4   | 6    | 26   | 41   |
| 4442899 | 14  | 2   | 4   | 1   | 2    | 5   | 17  | 7   | 18   | 6   | 33   | 6    | 12   |
| 278712  | 16  | 5   | 20  | 6   | 4    | 10  | 8   | 64  | 29   | 24  | 36   | 21   | 10   |
| 4469233 | 5   | 10  | 7   | 7   | 2    | 8   | 7   | 4   | 1    | 6   | 0    | 8    | 5    |
| 184484  | 5   | 0   | 0   | 2   | 1    | 0   | 2   | 5   | 31   | 1   | 14   | 3    | 7    |
| 655793  | 38  | 5   | 7   | 33  | 5    | 15  | 18  | 3   | 47   | 12  | 15   | 21   | 5    |
| 405780  | 0   | 0   | 0   | 0   | 0    | 0   | 0   | 0   | 22   | 0   | 1    | 58   | 1    |
| 174824  | 42  | 101 | 21  | 250 | 31   | 70  | 50  | 0   | 0    | 0   | 0    | 9    | 16   |
| 181193  | 5   | 27  | 0   | 3   | 0    | 21  | 12  | 2   | 28   | 2   | 0    | 11   | 0    |
| 3974550 | 0   | 51  | 6   | 124 | 10   | 5   | 7   | 2   | 0    | 0   | 2    | 4    | 2    |
| 173916  | 1   | 0   | 0   | 2   | 0    | 0   | 0   | 0   | 0    | 1   | 1    | 0    | 0    |
| 197623  | 364 | 365 | 630 | 624 | 1261 | 769 | 466 | 144 | 605  | 53  | 128  | 210  | 229  |
| 628218  | 0   | 0   | 0   | 0   | 0    | 0   | 0   | 0   | 2    | 1   | 0    | 34   | 12   |
| 175706  | 90  | 421 | 554 | 462 | 80   | 88  | 47  | 647 | 857  | 296 | 247  | 248  | 106  |
| 183106  | 24  | 21  | 32  | 60  | 46   | 5   | 3   | 2   | 9    | 0   | 1    | 1    | 3    |
| 267958  | 194 | 60  | 8   | 113 | 45   | 47  | 67  | 5   | 3    | 6   | 38   | 186  | 29   |
| 189288  | 52  | 6   | 8   | 38  | 6    | 7   | 0   | 1   | 29   | 0   | 9    | 4    | 4    |
| 177621  | 209 | 24  | 4   | 87  | 11   | 8   | 16  | 0   | 21   | 3   | 3    | 12   | 7    |
| 829240  | 0   | 0   | 0   | 0   | 0    | 0   | 0   | 0   | 0    | 0   | 0    | 0    | 0    |
| 2645488 | 37  | 56  | 1   | 34  | 10   | 14  | 19  | 3   | 0    | 8   | 4    | 1    | 7    |
| 186886  | 10  | 7   | 47  | 28  | 2    | 10  | 2   | 0   | 6    | 56  | 5    | 4    | 3    |
| 210262  | 2   | 4   | 14  | 14  | 0    | 7   | 1   | 9   | 5    | 6   | 0    | 5    | 3    |
| 271822  | 92  | 63  | 84  | 168 | 48   | 11  | 26  | 6   | 129  | 23  | 67   | 29   | 122  |
| 196746  | 4   | 1   | 11  | 16  | 5    | 1   | 14  | 1   | 43   | 0   | 10   | 5    | 1    |
| 179343  | 27  | 11  | 22  | 32  | 25   | 5   | 5   | 2   | 4    | 1   | 0    | 0    | 1    |
| 4435934 | 2   | 10  | 3   | 23  | 2    | 2   | 1   | 2   | 17   | 0   | 0    | 0    | 1    |
| 746679  | 0   | 0   | 0   | 3   | 0    | 0   | 0   | 0   | 0    | 0   | 0    | 0    | 0    |
| 4481506 | 0   | 0   | 0   | 0   | 0    | 0   | 6   | 0   | 0    | 0   | 0    | 0    | 2    |
| 4357315 | 76  | 17  | 102 | 109 | 19   | 41  | 28  | 4   | 11   | 20  | 27   | 16   | 88   |
| 452014  | 14  | 3   | 17  | 23  | 2    | 10  | 8   | 2   | 6    | 4   | 4    | 4    | 29   |
| 68844   | 248 | 60  | 21  | 188 | 18   | 11  | 38  | 1   | 1    | 1   | 115  | 0    | 1    |
| 272593  | 0   | 1   | 1   | 3   | 1    | 0   | 4   | 0   | 3    | 4   | 0    | 1    | 17   |
| 182995  | 20  | 98  | 225 | 116 | 118  | 26  | 34  | 53  | 1    | 42  | 53   | 3    | 4    |
| 4383135 | 233 | 0   | 31  | 267 | 1    | 23  | 0   | 86  | 1214 | 443 | 21   | 528  | 88   |
| 328143  | 10  | 4   | 9   | 5   | 14   | 9   | 15  | 0   | 49   | 0   | 3    | 12   | 11   |
| 185614  | 13  | 12  | 54  | 11  | 28   | 15  | 12  | 21  | 1    | 19  | 21   | 0    | 1    |

Table S3 C

| ID      | R   | R.1 | R.2 | R.3 | R.4 | R.5  | R.6 | R.7 | R.8 | R.9 | R.10 | R.11 | R.12 |
|---------|-----|-----|-----|-----|-----|------|-----|-----|-----|-----|------|------|------|
| 4378081 | 0   | 1   | 0   | 0   | 0   | 0    | 0   | 6   | 0   | 0   | 0    | 0    | 0    |
| 162539  | 0   | 0   | 2   | 0   | 0   | 0    | 0   | 0   | 0   | 0   | 6    | 0    | 0    |
| 4459184 | 1   | 0   | 0   | 2   | 0   | 1    | 1   | 13  | 57  | 0   | 0    | 2    | 0    |
| 586453  | 0   | 11  | 1   | 2   | 1   | 1    | 15  | 0   | 0   | 6   | 1    | 0    | 2    |
| 827487  | 0   | 1   | 0   | 10  | 1   | 0    | 0   | 0   | 0   | 0   | 0    | 0    | 0    |
| 184966  | 0   | 0   | 0   | 0   | 0   | 1    | 0   | 48  | 118 | 5   | 1    | 6    | 162  |
| 209028  | 24  | 13  | 40  | 25  | 16  | 15   | 7   | 40  | 23  | 15  | 44   | 11   | 2    |
| 197600  | 68  | 15  | 1   | 34  | 14  | 20   | 17  | 2   | 15  | 27  | 5    | 21   | 59   |
| 4446120 | 24  | 13  | 12  | 76  | 3   | 8    | 0   | 1   | 0   | 0   | 18   | 3    | 0    |
| 356187  | 10  | 1   | 4   | 14  | 2   | 13   | 0   | 1   | 2   | 8   | 1    | 5    | 6    |
| 1108078 | 1   | 8   | 0   | 8   | 1   | 0    | 1   | 1   | 2   | 0   | 0    | 11   | 5    |
| 1105589 | 17  | 2   | 10  | 3   | 15  | 7    | 7   | 16  | 40  | 5   | 11   | 10   | 4    |
| 4342104 | 220 | 337 | 103 | 247 | 100 | 1111 | 135 | 352 | 46  | 115 | 605  | 453  | 239  |
| 180476  | 5   | 0   | 0   | 3   | 0   | 1    | 3   | 2   | 6   | 2   | 2    | 1    | 0    |
| 4335302 | 4   | 0   | 4   | 15  | 6   | 7    | 0   | 11  | 4   | 0   | 1    | 2    | 2    |
| 158302  | 0   | 0   | 1   | 0   | 0   | 0    | 1   | 0   | 25  | 0   | 0    | 0    | 1    |
| 445144  | 5   | 6   | 9   | 11  | 5   | 15   | 16  | 11  | 79  | 7   | 6    | 15   | 18   |
| 184753  | 3   | 3   | 6   | 36  | 3   | 7    | 3   | 4   | 21  | 3   | 7    | 31   | 61   |
| 192712  | 297 | 301 | 436 | 640 | 163 | 182  | 128 | 200 | 690 | 103 | 111  | 206  | 239  |
| 4414242 | 14  | 3   | 0   | 13  | 3   | 11   | 4   | 2   | 5   | 1   | 23   | 7    | 6    |
| 255098  | 0   | 6   | 0   | 16  | 1   | 0    | 0   | 0   | 0   | 0   | 0    | 0    | 0    |
| 173892  | 102 | 19  | 2   | 52  | 4   | 1    | 8   | 3   | 18  | 6   | 17   | 11   | 17   |
| 4329776 | 16  | 3   | 0   | 10  | 0   | 5    | 6   | 4   | 21  | 3   | 20   | 6    | 7    |
| 4483585 | 0   | 0   | 0   | 0   | 0   | 0    | 0   | 10  | 21  | 0   | 1    | 1    | 30   |
| 114111  | 0   | 0   | 0   | 0   | 0   | 0    | 0   | 0   | 0   | 0   | 0    | 0    | 0    |
| 214715  | 44  | 38  | 59  | 57  | 155 | 32   | 21  | 2   | 18  | 0   | 1    | 9    | 5    |
| 262159  | 1   | 0   | 0   | 1   | 1   | 3    | 2   | 1   | 1   | 0   | 0    | 0    | 1    |
| 277364  | 183 | 439 | 779 | 686 | 205 | 126  | 77  | 577 | 544 | 113 | 682  | 157  | 451  |
| 195433  | 5   | 0   | 2   | 2   | 2   | 14   | 2   | 2   | 3   | 2   | 1    | 1    | 1    |
| 4449236 | 188 | 462 | 678 | 485 | 680 | 295  | 298 | 30  | 89  | 34  | 7    | 11   | 358  |
| 269401  | 30  | 5   | 16  | 26  | 3   | 7    | 3   | 2   | 19  | 18  | 5    | 10   | 17   |
| 261177  | 49  | 118 | 217 | 162 | 9   | 5    | 6   | 397 | 41  | 60  | 488  | 140  | 4    |
| 261178  | 0   | 0   | 0   | 0   | 0   | 0    | 0   | 22  | 2   | 0   | 0    | 2    | 7    |
| 190673  | 8   | 8   | 23  | 49  | 8   | 5    | 9   | 17  | 15  | 9   | 6    | 7    | 25   |
| 176836  | 15  | 3   | 1   | 13  | 5   | 5    | 1   | 0   | 20  | 4   | 1    | 3    | 1    |
| 188116  | 2   | 0   | 0   | 2   | 1   | 1    | 0   | 1   | 14  | 1   | 0    | 14   | 1    |
| 234121  | 2   | 0   | 0   | 1   | 0   | 0    | 0   | 2   | 2   | 183 | 2    | 4    | 1    |
| 144207  | 0   | 38  | 3   | 62  | 6   | 1    | 0   | 0   | 0   | 0   | 0    | 3    | 0    |
| 188786  | 102 | 24  | 3   | 20  | 6   | 3    | 7   | 2   | 24  | 2   | 76   | 4    | 11   |
| 196856  | 8   | 2   | 0   | 19  | 0   | 1    | 1   | 0   | 4   | 0   | 3    | 1    | 4    |
| 214116  | 2   | 58  | 39  | 65  | 67  | 137  | 56  | 723 | 901 | 8   | 2    | 3    | 58   |
| 265047  | 0   | 0   | 0   | 0   | 0   | 0    | 0   | 32  | 0   | 2   | 0    | 5    | 6    |
| 415491  | 73  | 62  | 15  | 36  | 5   | 18   | 17  | 12  | 30  | 9   | 3    | 18   | 6    |
| 4390365 | 0   | 0   | 0   | 0   | 0   | 0    | 0   | 2   | 228 | 57  | 38   | 133  | 259  |
| 174667  | 17  | 13  | 2   | 48  | 8   | 7    | 27  | 0   | 17  | 3   | 33   | 8    | 24   |

Table S3 C

| ID      | R    | R.1  | R.2  | R.3  | R.4  | R.5  | R.6  | R.7 | R.8  | R.9 | R.10 | R.11 | R.12 |
|---------|------|------|------|------|------|------|------|-----|------|-----|------|------|------|
| 2901239 | 0    | 1    | 0    | 1    | 0    | 0    | 0    | 0   | 0    | 17  | 2    | 0    | 0    |
| 273687  | 1    | 0    | 0    | 0    | 5    | 25   | 6    | 16  | 61   | 7   | 36   | 53   | 8    |
| 319165  | 26   | 10   | 1    | 33   | 2    | 0    | 2    | 0   | 7    | 0   | 7    | 1    | 5    |
| 269426  | 33   | 24   | 4    | 52   | 17   | 9    | 36   | 1   | 5    | 14  | 29   | 27   | 11   |
| 270303  | 72   | 26   | 20   | 65   | 14   | 36   | 14   | 10  | 54   | 42  | 18   | 48   | 44   |
| 329271  | 1    | 0    | 3    | 3    | 0    | 1    | 0    | 13  | 3    | 2   | 2    | 7    | 3    |
| 198024  | 37   | 1    | 2    | 4    | 3    | 6    | 3    | 3   | 18   | 3   | 4    | 14   | 5    |
| 896545  | 0    | 0    | 0    | 111  | 1    | 0    | 0    | 1   | 0    | 0   | 0    | 0    | 0    |
| 263705  | 11   | 13   | 14   | 22   | 2    | 16   | 8    | 6   | 10   | 7   | 7    | 10   | 7    |
| 174418  | 218  | 21   | 4    | 116  | 50   | 33   | 1    | 0   | 1    | 54  | 255  | 6    | 0    |
| 174417  | 0    | 0    | 0    | 0    | 0    | 0    | 0    | 13  | 1    | 0   | 0    | 0    | 0    |
| 184329  | 12   | 16   | 82   | 27   | 36   | 8    | 17   | 52  | 0    | 34  | 42   | 2    | 2    |
| 192342  | 0    | 0    | 0    | 4    | 0    | 0    | 0    | 0   | 0    | 0   | 0    | 0    | 0    |
| 4453773 | 81   | 193  | 34   | 97   | 23   | 10   | 13   | 0   | 0    | 106 | 16   | 13   | 0    |
| 372473  | 0    | 0    | 0    | 1    | 0    | 0    | 0    | 0   | 0    | 0   | 0    | 0    | 0    |
| 199698  | 71   | 46   | 110  | 157  | 91   | 15   | 11   | 18  | 57   | 5   | 6    | 8    | 21   |
| 191067  | 1    | 0    | 0    | 1    | 1    | 24   | 7    | 4   | 24   | 3   | 1    | 10   | 12   |
| 453896  | 54   | 76   | 123  | 134  | 139  | 37   | 34   | 75  | 110  | 11  | 22   | 45   | 77   |
| 179548  | 69   | 61   | 124  | 102  | 168  | 17   | 29   | 49  | 12   | 5   | 9    | 31   | 31   |
| 179547  | 759  | 109  | 30   | 437  | 26   | 32   | 34   | 11  | 106  | 21  | 39   | 27   | 184  |
| 113978  | 48   | 115  | 22   | 62   | 8    | 18   | 15   | 0   | 0    | 221 | 48   | 21   | 0    |
| 3449666 | 0    | 0    | 0    | 0    | 0    | 0    | 0    | 0   | 0    | 0   | 0    | 0    | 0    |
| 4468234 | 0    | 0    | 0    | 3    | 0    | 14   | 5    | 15  | 25   | 5   | 17   | 43   | 83   |
| 4466275 | 21   | 12   | 22   | 45   | 5    | 2    | 1    | 0   | 10   | 7   | 0    | 5    | 2    |
| 186742  | 0    | 0    | 0    | 0    | 0    | 0    | 0    | 0   | 0    | 114 | 0    | 0    | 0    |
| 308332  | 0    | 0    | 0    | 0    | 18   | 15   | 38   | 12  | 340  | 3   | 0    | 347  | 84   |
| 318819  | 187  | 11   | 2    | 21   | 6    | 8    | 26   | 23  | 14   | 11  | 6    | 7    | 32   |
| 4379449 | 0    | 0    | 0    | 0    | 0    | 0    | 0    | 2   | 87   | 18  | 12   | 54   | 161  |
| 105109  | 4    | 8    | 33   | 37   | 0    | 7    | 2    | 2   | 10   | 6   | 1    | 6    | 15   |
| 261132  | 172  | 33   | 53   | 196  | 9    | 30   | 7    | 9   | 139  | 20  | 2    | 23   | 26   |
| 808794  | 161  | 28   | 14   | 121  | 14   | 8    | 5    | 2   | 49   | 6   | 22   | 18   | 6    |
| 407393  | 20   | 31   | 44   | 32   | 58   | 21   | 26   | 41  | 59   | 10  | 10   | 28   | 43   |
| 267406  | 4    | 2    | 3    | 15   | 5    | 16   | 6    | 0   | 0    | 2   | 0    | 0    | 6    |
| 672655  | 39   | 70   | 162  | 121  | 53   | 21   | 17   | 66  | 88   | 12  | 78   | 27   | 62   |
| 260989  | 0    | 29   | 2    | 10   | 0    | 0    | 0    | 0   | 0    | 0   | 0    | 0    | 0    |
| 2877100 | 31   | 45   | 19   | 67   | 61   | 82   | 89   | 1   | 1    | 11  | 22   | 24   | 3    |
| 305787  | 8    | 23   | 47   | 25   | 1    | 15   | 13   | 13  | 57   | 2   | 5    | 11   | 4    |
| 302641  | 6    | 1    | 3    | 5    | 1    | 6    | 6    | 1   | 20   | 21  | 2    | 1    | 4    |
| 1992    | 49   | 14   | 13   | 225  | 40   | 48   | 10   | 13  | 2    | 3   | 18   | 13   | 12   |
| 353073  | 42   | 12   | 52   | 14   | 49   | 21   | 21   | 10  | 101  | 3   | 10   | 16   | 16   |
| 134762  | 1190 | 1080 | 1682 | 2128 | 1440 | 1185 | 1061 | 332 | 4665 | 209 | 402  | 1157 | 840  |
| 175646  | 19   | 11   | 2    | 40   | 37   | 14   | 18   | 2   | 162  | 2   | 0    | 2    | 45   |
| 263518  | 35   | 11   | 10   | 32   | 11   | 20   | 8    | 44  | 105  | 48  | 24   | 41   | 81   |
| 2137001 | 26   | 29   | 14   | 312  | 14   | 31   | 21   | 38  | 115  | 23  | 46   | 160  | 227  |
| 3231096 | 9    | 9    | 15   | 16   | 17   | 14   | 12   | 27  | 33   | 10  | 12   | 18   | 29   |

Table S3 C

| ID      | R   | R.1  | R.2  | R.3 | R.4  | R.5   | R.6   | R.7   | R.8  | R.9  | R.10  | R.11  | R.12  |
|---------|-----|------|------|-----|------|-------|-------|-------|------|------|-------|-------|-------|
| 176444  | 449 | 45   | 320  | 784 | 138  | 258   | 92    | 461   | 405  | 251  | 249   | 483   | 645   |
| 261114  | 0   | 12   | 0    | 3   | 0    | 0     | 0     | 2     | 0    | 2    | 0     | 2     | 5     |
| 191216  | 0   | 1    | 11   | 13  | 1    | 8     | 3     | 48    | 11   | 4    | 6     | 5     | 5     |
| 191218  | 14  | 221  | 71   | 401 | 25   | 43    | 55    | 10    | 105  | 49   | 15    | 4     | 4     |
| 167509  | 7   | 4    | 2    | 18  | 2    | 25    | 0     | 25    | 4    | 1    | 5     | 5     | 5     |
| 175416  | 2   | 0    | 0    | 0   | 0    | 2     | 1     | 21    | 0    | 11   | 1     | 8     | 1     |
| 183829  | 0   | 0    | 4    | 3   | 0    | 16    | 10    | 132   | 0    | 25   | 17    | 17    | 11    |
| 4462541 | 1   | 594  | 0    | 22  | 0    | 0     | 0     | 1     | 0    | 4    | 0     | 244   | 2     |
| 2154095 | 88  | 24   | 8    | 118 | 35   | 7     | 3     | 2     | 8    | 3    | 15    | 5     | 4     |
| 4416434 | 121 | 330  | 16   | 63  | 5    | 297   | 288   | 1     | 13   | 5    | 56    | 12    | 7     |
| 440840  | 52  | 11   | 6    | 39  | 9    | 38    | 61    | 7     | 13   | 2    | 59    | 4     | 5     |
| 40798   | 30  | 8    | 4    | 18  | 4    | 15    | 22    | 5     | 53   | 3    | 8     | 26    | 12    |
| 229452  | 44  | 36   | 50   | 108 | 34   | 10    | 11    | 7     | 0    | 2    | 1     | 36    | 19    |
| 229455  | 14  | 4    | 8    | 20  | 9    | 5     | 5     | 0     | 2    | 1    | 6     | 1     | 3     |
| 178480  | 13  | 14   | 20   | 9   | 5    | 48    | 49    | 0     | 3    | 1    | 36    | 59    | 3     |
| 4454025 | 1   | 2    | 0    | 0   | 1    | 0     | 0     | 0     | 2    | 0    | 0     | 3     | 0     |
| 4470092 | 2   | 0    | 0    | 2   | 0    | 0     | 1     | 0     | 55   | 2    | 0     | 12    | 2     |
| 259846  | 0   | 0    | 0    | 0   | 0    | 0     | 0     | 29    | 1719 | 52   | 5     | 484   | 123   |
| 177068  | 256 | 211  | 22   | 140 | 9    | 10    | 41    | 9     | 107  | 10   | 131   | 25    | 59    |
| 97263   | 0   | 2    | 0    | 1   | 1    | 1     | 3     | 4     | 9    | 1    | 1     | 1     | 2     |
| 197099  | 66  | 4    | 3    | 10  | 7    | 10    | 15    | 3     | 18   | 9    | 16    | 23    | 29    |
| 265976  | 13  | 0    | 1    | 2   | 1    | 1     | 0     | 0     | 5    | 3    | 2     | 2     | 4     |
| 324999  | 3   | 2    | 1    | 0   | 0    | 21    | 12    | 4     | 19   | 2    | 5     | 16    | 1     |
| 262677  | 21  | 2    | 6    | 11  | 2    | 6     | 1     | 3     | 1    | 9    | 5     | 9     | 0     |
| 647320  | 39  | 14   | 14   | 100 | 9    | 0     | 5     | 0     | 27   | 3    | 2     | 6     | 10    |
| 174573  | 102 | 78   | 157  | 135 | 210  | 21    | 24    | 54    | 26   | 10   | 13    | 45    | 49    |
| 174571  | 7   | 1    | 0    | 2   | 0    | 0     | 0     | 11    | 102  | 4    | 1     | 38    | 22    |
| 1571092 | 0   | 0    | 0    | 0   | 0    | 0     | 1     | 0     | 332  | 12   | 0     | 218   | 30    |
| 177271  | 606 | 992  | 272  | 786 | 308  | 754   | 66    | 224   | 8    | 32   | 455   | 289   | 170   |
| 4207913 | 12  | 18   | 34   | 25  | 6    | 6     | 4     | 3     | 4    | 3    | 2     | 11    | 5     |
| 1112121 | 0   | 1    | 0    | 0   | 0    | 1     | 0     | 4     | 5    | 7    | 3     | 27    | 26    |
| 4334624 | 1   | 0    | 0    | 0   | 0    | 0     | 0     | 1     | 74   | 0    | 11    | 10    | 3     |
| 390896  | 18  | 53   | 94   | 63  | 62   | 15    | 15    | 35    | 37   | 10   | 12    | 11    | 17    |
| 129394  | 0   | 1    | 0    | 0   | 0    | 0     | 0     | 9     | 0    | 0    | 0     | 0     | 0     |
| 2897325 | 0   | 0    | 0    | 0   | 0    | 0     | 0     | 0     | 0    | 0    | 0     | 0     | 0     |
| 786708  | 0   | 0    | 0    | 0   | 0    | 0     | 0     | 0     | 0    | 0    | 0     | 0     | 0     |
| 180235  | 1   | 0    | 0    | 0   | 0    | 32    | 16    | 21    | 46   | 38   | 9     | 49    | 70    |
| 185036  | 39  | 31   | 33   | 92  | 19   | 1     | 3     | 1     | 6    | 5    | 3     | 7     | 8     |
| 130335  | 0   | 0    | 0    | 0   | 0    | 0     | 0     | 8     | 5    | 0    | 0     | 1     | 0     |
| 259249  | 0   | 0    | 4    | 2   | 1    | 1     | 1     | 0     | 0    | 147  | 131   | 1     | 2     |
| 98048   | 94  | 20   | 10   | 77  | 5    | 31    | 2     | 2     | 16   | 9    | 42    | 83    | 35    |
| 261892  | 1   | 2    | 2    | 12  | 10   | 29    | 5     | 0     | 9    | 14   | 1     | 41    | 9     |
| 1594231 | 0   | 0    | 0    | 0   | 0    | 1     | 1     | 53    | 2    | 2    | 0     | 1     | 1     |
| 4374042 | 500 | 7844 | 8517 | 937 | 4918 | 12297 | 17013 | 12060 | 6445 | 8374 | 12740 | 11615 | 14504 |
| 204111  | 53  | 3    | 32   | 16  | 15   | 16    | 5     | 107   | 50   | 45   | 43    | 23    | 58    |

Table S3 C

| ID      | R    | R.1 | R.2 | R.3 | R.4 | R.5 | R.6 | R.7 | R.8 | R.9 | R.10 | R.11 | R.12 |
|---------|------|-----|-----|-----|-----|-----|-----|-----|-----|-----|------|------|------|
| 274380  | 4    | 1   | 1   | 7   | 1   | 14  | 16  | 4   | 20  | 1   | 17   | 15   | 10   |
| 176957  | 75   | 1   | 5   | 11  | 4   | 1   | 5   | 3   | 45  | 12  | 6    | 7    | 7    |
| 198238  | 7    | 2   | 0   | 1   | 0   | 0   | 0   | 2   | 2   | 2   | 17   | 2    | 19   |
| 1110253 | 393  | 14  | 30  | 201 | 25  | 58  | 35  | 24  | 54  | 30  | 20   | 43   | 73   |
| 171079  | 11   | 2   | 1   | 3   | 2   | 1   | 3   | 1   | 20  | 1   | 4    | 3    | 5    |
| 174004  | 111  | 124 | 197 | 270 | 158 | 120 | 66  | 190 | 578 | 70  | 139  | 183  | 224  |
| 182712  | 0    | 0   | 0   | 0   | 0   | 0   | 0   | 0   | 0   | 0   | 0    | 0    | 0    |
| 4417539 | 0    | 0   | 0   | 0   | 0   | 0   | 0   | 0   | 0   | 0   | 0    | 0    | 0    |
| 1107303 | 0    | 0   | 0   | 0   | 0   | 0   | 0   | 0   | 0   | 60  | 0    | 0    | 1    |
| 310407  | 0    | 0   | 0   | 0   | 0   | 0   | 0   | 63  | 4   | 0   | 0    | 0    | 0    |
| 201374  | 0    | 11  | 0   | 9   | 1   | 0   | 1   | 0   | 0   | 0   | 0    | 0    | 1    |
| 261409  | 8    | 5   | 8   | 86  | 3   | 13  | 16  | 6   | 19  | 3   | 0    | 3    | 65   |
| 320972  | 3    | 0   | 0   | 0   | 0   | 1   | 1   | 3   | 0   | 84  | 5    | 29   | 79   |
| 196974  | 16   | 20  | 7   | 20  | 18  | 10  | 9   | 9   | 7   | 2   | 0    | 4    | 8    |
| 345362  | 0    | 0   | 0   | 1   | 0   | 0   | 0   | 0   | 0   | 0   | 0    | 0    | 0    |
| 134065  | 208  | 123 | 18  | 426 | 103 | 69  | 276 | 0   | 0   | 1   | 34   | 102  | 28   |
| 191616  | 151  | 66  | 30  | 171 | 21  | 72  | 119 | 34  | 194 | 11  | 36   | 149  | 69   |
| 460953  | 218  | 393 | 541 | 896 | 282 | 188 | 183 | 373 | 299 | 130 | 236  | 433  | 47   |
| 174768  | 0    | 0   | 0   | 1   | 0   | 0   | 0   | 88  | 2   | 4   | 0    | 0    | 0    |
| 312322  | 6    | 1   | 6   | 2   | 3   | 4   | 2   | 3   | 11  | 0   | 1    | 1    | 3    |
| 724472  | 0    | 0   | 0   | 0   | 0   | 1   | 0   | 0   | 8   | 7   | 0    | 1    | 1    |
| 207749  | 0    | 0   | 0   | 0   | 0   | 0   | 0   | 0   | 0   | 0   | 0    | 0    | 0    |
| 189730  | 19   | 50  | 76  | 77  | 37  | 24  | 30  | 83  | 51  | 17  | 10   | 43   | 24   |
| 187841  | 6    | 15  | 3   | 87  | 9   | 9   | 5   | 10  | 33  | 7   | 4    | 47   | 64   |
| 186073  | 40   | 65  | 35  | 115 | 60  | 59  | 62  | 0   | 0   | 5   | 24   | 15   | 0    |
| 1087825 | 0    | 0   | 0   | 0   | 1   | 0   | 1   | 0   | 1   | 1   | 1    | 1    | 0    |
| 47477   | 1    | 0   | 0   | 2   | 10  | 4   | 2   | 2   | 1   | 1   | 0    | 3    | 0    |
| 4296701 | 105  | 15  | 21  | 49  | 8   | 4   | 1   | 0   | 4   | 0   | 5    | 3    | 4    |
| 169428  | 6    | 96  | 18  | 60  | 40  | 56  | 31  | 34  | 108 | 8   | 5    | 25   | 49   |
| 306469  | 78   | 62  | 26  | 26  | 66  | 95  | 17  | 9   | 63  | 4   | 110  | 0    | 145  |
| 833390  | 16   | 0   | 1   | 3   | 2   | 2   | 2   | 7   | 34  | 1   | 2    | 49   | 0    |
| 315147  | 0    | 0   | 0   | 0   | 0   | 1   | 2   | 1   | 0   | 1   | 0    | 0    | 0    |
| 342962  | 0    | 0   | 0   | 0   | 0   | 0   | 0   | 0   | 0   | 0   | 0    | 0    | 0    |
| 929476  | 0    | 0   | 0   | 0   | 0   | 0   | 0   | 0   | 0   | 0   | 0    | 0    | 1    |
| 635059  | 0    | 0   | 0   | 0   | 0   | 0   | 0   | 21  | 0   | 0   | 0    | 3    | 0    |
| 228310  | 0    | 0   | 0   | 1   | 0   | 0   | 0   | 0   | 0   | 0   | 0    | 1    | 0    |
| 172705  | 696  | 202 | 68  | 285 | 144 | 228 | 235 | 127 | 403 | 8   | 0    | 0    | 164  |
| 185177  | 2    | 1   | 0   | 1   | 2   | 1   | 14  | 0   | 60  | 0   | 0    | 20   | 8    |
| 413996  | 204  | 300 | 439 | 645 | 454 | 321 | 243 | 431 | 801 | 54  | 122  | 357  | 687  |
| 1106683 | 11   | 0   | 0   | 0   | 0   | 35  | 6   | 7   | 195 | 7   | 7    | 103  | 3    |
| 4314257 | 1046 | 193 | 30  | 532 | 36  | 80  | 57  | 25  | 304 | 54  | 77   | 72   | 393  |
| 271013  | 8    | 226 | 50  | 105 | 22  | 9   | 10  | 1   | 11  | 4   | 1    | 3    | 1    |
| 264101  | 271  | 32  | 50  | 63  | 23  | 93  | 145 | 3   | 261 | 53  | 3    | 65   | 83   |
| 4402042 | 8    | 43  | 33  | 41  | 28  | 42  | 24  | 0   | 0   | 0   | 0    | 0    | 0    |
| 72820   | 0    | 0   | 0   | 1   | 0   | 0   | 0   | 0   | 0   | 0   | 0    | 0    | 0    |

Table S3 C

| ID      | R    | R.1  | R.2  | R.3  | R.4 | R.5 | R.6  | R.7  | R.8  | R.9 | R.10 | R.11 | R.12 |
|---------|------|------|------|------|-----|-----|------|------|------|-----|------|------|------|
| 194944  | 133  | 1    | 4    | 13   | 3   | 0   | 3    | 0    | 6    | 1   | 21   | 5    | 5    |
| 166535  | 10   | 1    | 3    | 11   | 2   | 2   | 1    | 4    | 6    | 20  | 6    | 3    | 2    |
| 247557  | 33   | 3    | 7    | 15   | 3   | 8   | 2    | 0    | 1    | 3   | 4    | 2    | 1    |
| 1871    | 6    | 76   | 80   | 9    | 45  | 161 | 246  | 225  | 78   | 136 | 181  | 130  | 208  |
| 350666  | 119  | 107  | 50   | 133  | 90  | 104 | 73   | 56   | 126  | 11  | 15   | 95   | 104  |
| 190242  | 5    | 17   | 7    | 30   | 8   | 18  | 12   | 13   | 15   | 11  | 16   | 1    | 13   |
| 100344  | 0    | 0    | 0    | 0    | 0   | 0   | 0    | 0    | 0    | 0   | 0    | 0    | 0    |
| 186338  | 0    | 0    | 1    | 0    | 2   | 1   | 0    | 1    | 1    | 1   | 2    | 2    | 2    |
| 542096  | 1063 | 273  | 117  | 948  | 99  | 57  | 153  | 17   | 641  | 27  | 414  | 182  | 54   |
| 619224  | 7    | 104  | 9    | 51   | 44  | 57  | 42   | 66   | 152  | 11  | 5    | 47   | 78   |
| 179695  | 93   | 1    | 2    | 7    | 1   | 1   | 2    | 0    | 3    | 3   | 11   | 4    | 5    |
| 263664  | 94   | 74   | 142  | 165  | 173 | 89  | 98   | 125  | 46   | 14  | 34   | 138  | 133  |
| 265992  | 21   | 13   | 6    | 187  | 9   | 14  | 8    | 5    | 14   | 2   | 0    | 9    | 39   |
| 184209  | 23   | 36   | 19   | 317  | 17  | 55  | 31   | 54   | 132  | 32  | 55   | 208  | 380  |
| 261992  | 245  | 53   | 10   | 471  | 11  | 49  | 34   | 0    | 40   | 0   | 75   | 11   | 177  |
| 299858  | 47   | 45   | 4    | 25   | 2   | 5   | 6    | 6    | 30   | 4   | 24   | 5    | 12   |
| 259699  | 263  | 67   | 67   | 146  | 39  | 21  | 40   | 10   | 20   | 16  | 29   | 39   | 53   |
| 193723  | 2    | 5    | 14   | 13   | 5   | 8   | 2    | 5    | 16   | 1   | 5    | 3    | 3    |
| 204144  | 3    | 6    | 3    | 9    | 13  | 9   | 8    | 5    | 2    | 0   | 4    | 1    | 18   |
| 199403  | 7    | 59   | 1    | 37   | 2   | 8   | 5    | 1    | 20   | 3   | 1    | 6    | 14   |
| 1106468 | 1    | 3    | 3    | 2    | 3   | 7   | 7    | 15   | 34   | 4   | 7    | 7    | 26   |
| 176760  | 6    | 6    | 11   | 9    | 8   | 2   | 5    | 28   | 12   | 4   | 17   | 4    | 5    |
| 827592  | 151  | 4    | 3    | 57   | 1   | 2   | 2    | 1    | 1    | 0   | 14   | 9    | 212  |
| 416043  | 130  | 90   | 206  | 194  | 248 | 39  | 38   | 63   | 42   | 12  | 15   | 61   | 62   |
| 258641  | 0    | 0    | 0    | 0    | 0   | 0   | 0    | 37   | 0    | 1   | 0    | 5    | 11   |
| 36647   | 195  | 45   | 15   | 125  | 32  | 15  | 37   | 6    | 38   | 5   | 14   | 36   | 59   |
| 258423  | 0    | 0    | 0    | 2    | 0   | 0   | 0    | 2    | 0    | 2   | 59   | 45   | 33   |
| 258421  | 5    | 46   | 7    | 35   | 4   | 14  | 15   | 3    | 3    | 9   | 1    | 0    | 27   |
| 186555  | 27   | 17   | 2    | 39   | 1   | 3   | 0    | 1    | 26   | 13  | 20   | 2    | 10   |
| 306699  | 10   | 12   | 9    | 15   | 2   | 12  | 9    | 1    | 35   | 3   | 0    | 2    | 2    |
| 335267  | 13   | 1    | 2    | 1    | 16  | 3   | 3    | 0    | 10   | 1   | 1    | 2    | 3    |
| 771177  | 0    | 0    | 0    | 0    | 0   | 0   | 0    | 0    | 13   | 41  | 0    | 15   | 59   |
| 204171  | 15   | 3    | 24   | 25   | 15  | 4   | 6    | 7    | 19   | 4   | 0    | 2    | 5    |
| 299267  | 0    | 0    | 0    | 0    | 0   | 0   | 0    | 0    | 0    | 0   | 0    | 0    | 0    |
| 264802  | 6    | 0    | 2    | 3    | 11  | 7   | 3    | 1    | 3    | 32  | 1    | 15   | 5    |
| 4296218 | 30   | 15   | 15   | 17   | 4   | 5   | 1    | 0    | 0    | 17  | 4    | 14   | 15   |
| 162005  | 58   | 15   | 8    | 33   | 4   | 12  | 3    | 7    | 21   | 16  | 11   | 27   | 19   |
| 176242  | 0    | 0    | 5    | 0    | 15  | 26  | 5    | 7    | 16   | 2   | 2    | 14   | 0    |
| 310751  | 13   | 3    | 1    | 3    | 9   | 12  | 5    | 0    | 8    | 0   | 34   | 0    | 16   |
| 813217  | 0    | 0    | 0    | 1    | 0   | 0   | 0    | 0    | 0    | 0   | 0    | 0    | 0    |
| 165430  | 18   | 4    | 2    | 29   | 3   | 9   | 8    | 4    | 25   | 1   | 1    | 19   | 0    |
| 522371  | 4    | 23   | 19   | 41   | 5   | 2   | 1    | 17   | 5    | 14  | 9    | 10   | 3    |
| 593043  | 0    | 0    | 0    | 0    | 0   | 0   | 0    | 1    | 0    | 2   | 3    | 1    | 0    |
| 304047  | 761  | 1469 | 3058 | 2879 | 446 | 632 | 1178 | 1881 | 2065 | 315 | 1135 | 3737 | 4633 |
| 2084364 | 0    | 0    | 0    | 1    | 0   | 0   | 0    | 0    | 0    | 1   | 0    | 0    | 1    |

Table S3 C

| ID      | R    | R.1 | R.2 | R.3 | R.4 | R.5 | R.6 | R.7 | R.8 | R.9  | R.10 | R.11 | R.12 |
|---------|------|-----|-----|-----|-----|-----|-----|-----|-----|------|------|------|------|
| 313724  | 1    | 0   | 0   | 0   | 0   | 0   | 0   | 0   | 3   | 2    | 0    | 1    | 0    |
| 2937207 | 0    | 6   | 8   | 0   | 3   | 17  | 8   | 14  | 4   | 11   | 11   | 10   | 28   |
| 175213  | 57   | 3   | 1   | 14  | 0   | 2   | 6   | 1   | 10  | 1    | 27   | 0    | 8    |
| 4480555 | 1080 | 462 | 101 | 716 | 232 | 153 | 573 | 202 | 24  | 282  | 992  | 299  | 140  |
| 4480557 | 2375 | 449 | 190 | 768 | 73  | 124 | 186 | 0   | 56  | 0    | 27   | 35   | 1    |
| 175077  | 30   | 6   | 1   | 17  | 2   | 19  | 27  | 6   | 22  | 3    | 51   | 27   | 6    |
| 188266  | 382  | 6   | 6   | 33  | 5   | 7   | 16  | 1   | 2   | 0    | 24   | 1    | 2    |
| 259578  | 18   | 11  | 7   | 7   | 4   | 15  | 7   | 4   | 3   | 8    | 14   | 83   | 12   |
| 177512  | 21   | 52  | 96  | 53  | 44  | 14  | 13  | 13  | 3   | 6    | 11   | 1    | 1    |
| 3319464 | 0    | 0   | 0   | 0   | 0   | 0   | 0   | 0   | 0   | 0    | 0    | 0    | 0    |
| 3390534 | 5    | 11  | 10  | 17  | 4   | 69  | 15  | 19  | 7   | 12   | 58   | 30   | 21   |
| 277067  | 5    | 10  | 1   | 26  | 5   | 5   | 16  | 12  | 91  | 12   | 1    | 78   | 36   |
| 199674  | 15   | 1   | 1   | 8   | 1   | 5   | 16  | 1   | 3   | 1    | 2    | 0    | 5    |
| 3920500 | 450  | 104 | 59  | 405 | 63  | 22  | 24  | 4   | 78  | 42   | 63   | 65   | 12   |
| 265483  | 47   | 28  | 38  | 51  | 5   | 13  | 4   | 0   | 0   | 17   | 11   | 45   | 34   |
| 399606  | 126  | 192 | 42  | 100 | 19  | 85  | 54  | 41  | 158 | 19   | 31   | 73   | 10   |
| 192971  | 0    | 0   | 0   | 0   | 0   | 0   | 0   | 0   | 0   | 1    | 0    | 0    | 1    |
| 275218  | 44   | 18  | 14  | 45  | 9   | 3   | 6   | 10  | 97  | 5    | 12   | 21   | 11   |
| 228043  | 0    | 0   | 0   | 0   | 0   | 0   | 0   | 0   | 0   | 1    | 0    | 1    | 1    |
| 261486  | 22   | 4   | 6   | 28  | 1   | 1   | 2   | 0   | 26  | 4    | 2    | 5    | 4    |
| 297577  | 14   | 39  | 3   | 12  | 2   | 18  | 12  | 0   | 25  | 5    | 4    | 8    | 1    |
| 3150250 | 0    | 0   | 0   | 0   | 0   | 0   | 0   | 0   | 9   | 0    | 0    | 1    | 3    |
| 578016  | 0    | 0   | 0   | 0   | 0   | 20  | 15  | 36  | 34  | 24   | 27   | 22   | 53   |
| 637546  | 0    | 0   | 0   | 0   | 0   | 0   | 0   | 0   | 0   | 0    | 0    | 0    | 0    |
| 195691  | 14   | 3   | 1   | 6   | 3   | 3   | 3   | 2   | 55  | 34   | 2    | 14   | 10   |
| 4483570 | 4    | 24  | 29  | 72  | 4   | 0   | 2   | 8   | 1   | 13   | 4    | 9    | 0    |
| 4306262 | 47   | 18  | 43  | 57  | 2   | 11  | 6   | 43  | 150 | 1366 | 979  | 41   | 20   |
| 184451  | 0    | 0   | 1   | 0   | 27  | 11  | 21  | 5   | 216 | 4    | 0    | 198  | 35   |
| 184456  | 3    | 6   | 12  | 2   | 4   | 2   | 1   | 0   | 1   | 1    | 3    | 0    | 0    |
| 814952  | 1    | 0   | 0   | 0   | 0   | 0   | 0   | 0   | 0   | 0    | 0    | 0    | 0    |
| 264225  | 3    | 1   | 0   | 3   | 1   | 7   | 3   | 2   | 12  | 0    | 0    | 8    | 5    |
| 198865  | 34   | 4   | 43  | 15  | 24  | 14  | 11  | 19  | 41  | 5    | 5    | 11   | 31   |
| 4405128 | 104  | 129 | 222 | 322 | 74  | 20  | 12  | 137 | 20  | 28   | 14   | 65   | 14   |
| 3265889 | 13   | 1   | 0   | 1   | 0   | 0   | 0   | 0   | 546 | 15   | 435  | 353  | 27   |
| 1107652 | 1    | 4   | 0   | 11  | 0   | 0   | 1   | 0   | 0   | 0    | 0    | 0    | 0    |
| 195337  | 7    | 0   | 0   | 1   | 5   | 13  | 9   | 0   | 28  | 1    | 0    | 0    | 11   |
| 196672  | 8    | 4   | 24  | 5   | 15  | 3   | 7   | 12  | 0   | 7    | 10   | 0    | 1    |
| 269726  | 159  | 38  | 73  | 303 | 206 | 134 | 82  | 20  | 23  | 2    | 32   | 131  | 87   |
| 179457  | 135  | 134 | 202 | 309 | 99  | 18  | 27  | 40  | 44  | 9    | 40   | 19   | 25   |
| 637934  | 21   | 21  | 23  | 69  | 13  | 7   | 28  | 21  | 19  | 1    | 3    | 13   | 11   |
| 262917  | 7    | 1   | 0   | 1   | 0   | 2   | 3   | 8   | 208 | 21   | 1    | 64   | 482  |
| 1108599 | 1    | 1   | 10  | 4   | 1   | 3   | 3   | 8   | 0   | 52   | 4    | 5    | 0    |
| 339329  | 41   | 4   | 2   | 19  | 5   | 9   | 15  | 5   | 33  | 6    | 3    | 4    | 16   |
| 2875735 | 0    | 0   | 0   | 0   | 0   | 211 | 109 | 218 | 544 | 148  | 240  | 730  | 1469 |
| 4402834 | 2    | 0   | 2   | 3   | 0   | 1   | 0   | 694 | 21  | 67   | 0    | 95   | 16   |



Table S3 C

| ID      | R   | R.1 | R.2 | R.3 | R.4 | R.5 | R.6 | R.7 | R.8 | R.9 | R.10 | R.11 | R.12 |
|---------|-----|-----|-----|-----|-----|-----|-----|-----|-----|-----|------|------|------|
| 313898  | 43  | 3   | 3   | 5   | 1   | 8   | 8   | 0   | 5   | 0   | 7    | 3    | 1    |
| 176071  | 15  | 14  | 17  | 84  | 24  | 65  | 14  | 20  | 14  | 6   | 27   | 7    | 20   |
| 277497  | 4   | 3   | 0   | 2   | 2   | 4   | 2   | 49  | 14  | 5   | 0    | 8    | 6    |
| 349343  | 17  | 2   | 0   | 4   | 1   | 3   | 6   | 2   | 14  | 0   | 0    | 8    | 6    |
| 203605  | 172 | 132 | 240 | 353 | 260 | 38  | 19  | 44  | 118 | 22  | 16   | 25   | 59   |
| 4389125 | 3   | 4   | 7   | 5   | 2   | 654 | 190 | 174 | 76  | 40  | 294  | 141  | 307  |
| 170926  | 28  | 3   | 1   | 21  | 1   | 3   | 0   | 0   | 3   | 1   | 1    | 1    | 6    |
| 4448052 | 42  | 46  | 104 | 82  | 30  | 78  | 67  | 19  | 338 | 5   | 35   | 2    | 11   |
| 174698  | 130 | 8   | 8   | 12  | 6   | 22  | 26  | 5   | 5   | 5   | 30   | 7    | 5    |
| 332962  | 39  | 101 | 6   | 29  | 13  | 50  | 55  | 22  | 86  | 11  | 11   | 45   | 2    |
| 3610691 | 0   | 0   | 0   | 0   | 0   | 0   | 0   | 0   | 0   | 0   | 2    | 0    | 0    |
| 4390754 | 42  | 18  | 3   | 40  | 2   | 8   | 0   | 1   | 1   | 10  | 1    | 11   | 1    |
| 4457427 | 19  | 1   | 1   | 3   | 7   | 10  | 10  | 0   | 1   | 0   | 0    | 3    | 1    |
| 320169  | 0   | 0   | 0   | 0   | 0   | 0   | 0   | 1   | 0   | 1   | 0    | 0    | 0    |
| 265116  | 0   | 15  | 1   | 12  | 0   | 0   | 0   | 5   | 6   | 0   | 0    | 1    | 2    |
| 269125  | 16  | 166 | 34  | 114 | 77  | 247 | 154 | 198 | 569 | 22  | 30   | 158  | 270  |
| 4449518 | 367 | 634 | 972 | 982 | 163 | 78  | 29  | 0   | 0   | 0   | 1    | 0    | 12   |
| 561069  | 137 | 53  | 8   | 112 | 16  | 16  | 7   | 2   | 7   | 1   | 10   | 5    | 3    |
| 299171  | 9   | 2   | 1   | 0   | 2   | 13  | 2   | 1   | 3   | 4   | 4    | 5    | 5    |
| 40230   | 0   | 0   | 0   | 0   | 0   | 0   | 0   | 0   | 0   | 0   | 0    | 1    | 1    |
| 569818  | 443 | 113 | 62  | 332 | 66  | 24  | 44  | 8   | 44  | 3   | 61   | 19   | 9    |
| 319219  | 16  | 2   | 1   | 1   | 0   | 5   | 1   | 2   | 4   | 1   | 3    | 3    | 1    |
| 198964  | 147 | 100 | 192 | 265 | 180 | 26  | 27  | 39  | 113 | 14  | 14   | 25   | 51   |
| 618010  | 0   | 0   | 0   | 0   | 0   | 0   | 0   | 0   | 0   | 0   | 0    | 0    | 0    |
| 342075  | 3   | 3   | 3   | 2   | 10  | 5   | 4   | 2   | 3   | 0   | 1    | 1    | 3    |
| 135956  | 2   | 22  | 3   | 17  | 6   | 15  | 7   | 13  | 35  | 8   | 1    | 15   | 21   |
| 3919797 | 444 | 32  | 5   | 115 | 0   | 14  | 22  | 9   | 1   | 47  | 5    | 47   | 82   |
| 265301  | 22  | 13  | 1   | 20  | 5   | 1   | 6   | 4   | 4   | 8   | 22   | 15   | 3    |
| 578058  | 0   | 0   | 0   | 0   | 0   | 0   | 0   | 0   | 0   | 0   | 0    | 0    | 0    |
| 10196   | 0   | 0   | 0   | 0   | 0   | 0   | 0   | 0   | 0   | 0   | 0    | 0    | 0    |
| 259511  | 4   | 0   | 0   | 0   | 0   | 1   | 0   | 1   | 29  | 12  | 0    | 0    | 0    |
| 183619  | 5   | 6   | 12  | 8   | 3   | 30  | 23  | 41  | 28  | 5   | 16   | 44   | 70   |
| 261076  | 0   | 25  | 6   | 25  | 0   | 0   | 0   | 15  | 58  | 6   | 2    | 45   | 5    |
| 270391  | 31  | 103 | 116 | 320 | 21  | 7   | 6   | 78  | 21  | 85  | 38   | 39   | 11   |
| 4440624 | 53  | 17  | 2   | 30  | 6   | 0   | 6   | 1   | 0   | 0   | 1    | 3    | 0    |
| 4460604 | 6   | 0   | 0   | 0   | 0   | 1   | 0   | 39  | 3   | 4   | 68   | 644  | 3    |
| 95424   | 96  | 25  | 16  | 51  | 14  | 26  | 50  | 14  | 127 | 9   | 10   | 43   | 44   |
| 436341  | 22  | 9   | 0   | 4   | 2   | 6   | 3   | 3   | 15  | 1   | 1    | 8    | 1    |
| 295075  | 23  | 14  | 7   | 20  | 5   | 10  | 5   | 0   | 8   | 4   | 0    | 1    | 7    |
| 1678333 | 31  | 4   | 3   | 20  | 13  | 13  | 2   | 1   | 44  | 0   | 0    | 2    | 8    |
| 243185  | 0   | 0   | 0   | 6   | 0   | 0   | 0   | 0   | 0   | 0   | 0    | 0    | 0    |
| 175998  | 4   | 0   | 2   | 4   | 2   | 2   | 0   | 1   | 0   | 3   | 1    | 15   | 0    |
| 3267277 | 0   | 0   | 0   | 0   | 0   | 0   | 0   | 0   | 0   | 0   | 0    | 0    | 0    |
| 1931575 | 0   | 0   | 0   | 0   | 0   | 0   | 0   | 0   | 0   | 0   | 0    | 0    | 0    |
| 337784  | 21  | 4   | 1   | 17  | 3   | 10  | 2   | 4   | 6   | 8   | 3    | 7    | 10   |

Table S3 C

| ID      | R    | R.1  | R.2  | R.3  | R.4  | R.5  | R.6  | R.7  | R.8 | R.9   | R.10 | R.11 | R.12 |
|---------|------|------|------|------|------|------|------|------|-----|-------|------|------|------|
| 1921818 | 71   | 33   | 21   | 102  | 14   | 9    | 5    | 7    | 12  | 15    | 0    | 12   | 16   |
| 3172949 | 139  | 79   | 154  | 369  | 199  | 106  | 75   | 19   | 118 | 20    | 6    | 22   | 29   |
| 3172943 | 12   | 6    | 11   | 7    | 12   | 7    | 8    | 17   | 21  | 5     | 12   | 10   | 10   |
| 645358  | 0    | 0    | 0    | 0    | 0    | 0    | 0    | 0    | 0   | 0     | 0    | 0    | 0    |
| 838685  | 0    | 0    | 0    | 0    | 0    | 0    | 1    | 0    | 0   | 0     | 1    | 1    | 2    |
| 828284  | 0    | 1    | 0    | 2    | 0    | 0    | 0    | 0    | 0   | 0     | 0    | 0    | 0    |
| 1111755 | 1420 | 2074 | 8456 | 3693 | 1194 | 2871 | 1660 | 5034 | 5   | 39332 | 2130 | 2461 | 10   |
| 188878  | 404  | 393  | 150  | 474  | 451  | 1498 | 661  | 258  | 106 | 65    | 10   | 175  | 36   |
| 4401580 | 26   | 9    | 13   | 81   | 17   | 80   | 22   | 19   | 17  | 6     | 32   | 23   | 44   |
| 317854  | 2    | 34   | 10   | 93   | 5    | 1    | 5    | 1    | 4   | 1     | 0    | 2    | 3    |
| 4256470 | 2    | 0    | 8    | 7    | 5    | 1    | 6    | 3    | 1   | 0     | 1    | 0    | 1    |
| 839558  | 9    | 8    | 25   | 17   | 2    | 2    | 0    | 25   | 22  | 3     | 9    | 5    | 2    |
| 185743  | 136  | 34   | 9    | 40   | 19   | 130  | 21   | 32   | 6   | 9     | 157  | 35   | 35   |
| 4378740 | 0    | 0    | 0    | 1    | 0    | 1    | 0    | 2    | 1   | 1     | 0    | 0    | 4    |
| 266206  | 14   | 10   | 0    | 30   | 5    | 4    | 18   | 3    | 5   | 14    | 32   | 24   | 3    |
| 270513  | 6    | 8    | 6    | 55   | 4    | 13   | 15   | 12   | 16  | 2     | 0    | 7    | 33   |
| 334697  | 1    | 0    | 0    | 0    | 1    | 3    | 1    | 2    | 10  | 0     | 1    | 4    | 5    |
| 4352471 | 0    | 0    | 0    | 0    | 0    | 0    | 0    | 0    | 0   | 0     | 0    | 0    | 0    |
| 4426367 | 39   | 89   | 112  | 163  | 15   | 10   | 12   | 11   | 7   | 10    | 20   | 0    | 0    |
| 209030  | 50   | 208  | 370  | 291  | 154  | 50   | 59   | 118  | 228 | 27    | 70   | 106  | 80   |
| 190646  | 71   | 0    | 6    | 22   | 2    | 5    | 4    | 1    | 9   | 3     | 0    | 12   | 8    |
| 172389  | 2    | 0    | 2    | 2    | 1    | 0    | 1    | 3    | 3   | 34    | 0    | 12   | 0    |
| 213896  | 307  | 80   | 16   | 220  | 25   | 8    | 6    | 2    | 2   | 0     | 16   | 2    | 3    |
| 161762  | 75   | 13   | 14   | 30   | 6    | 15   | 14   | 0    | 8   | 1     | 7    | 13   | 41   |
| 174441  | 211  | 47   | 27   | 126  | 11   | 13   | 1    | 2    | 4   | 2     | 24   | 27   | 8    |
| 135625  | 6    | 0    | 3    | 3    | 0    | 0    | 0    | 1    | 1   | 5     | 0    | 20   | 2    |
| 4365109 | 0    | 0    | 1    | 1    | 1    | 7    | 1    | 3    | 81  | 0     | 1    | 51   | 25   |
| 832558  | 82   | 64   | 184  | 159  | 37   | 68   | 62   | 11   | 375 | 6     | 29   | 8    | 19   |
| 4464113 | 366  | 742  | 272  | 594  | 0    | 1    | 1    | 252  | 80  | 168   | 192  | 456  | 1    |
| 1105376 | 1    | 0    | 1    | 0    | 2    | 0    | 0    | 0    | 0   | 1     | 1    | 0    | 1    |
| 346275  | 29   | 22   | 0    | 15   | 1    | 2    | 3    | 1    | 4   | 0     | 6    | 1    | 5    |
| 3505032 | 2    | 106  | 15   | 205  | 11   | 5    | 5    | 0    | 4   | 0     | 1    | 4    | 1    |
| 4355436 | 2    | 0    | 0    | 0    | 0    | 0    | 1    | 7    | 1   | 26    | 241  | 6    | 1    |
| 4480176 | 18   | 55   | 187  | 160  | 6    | 53   | 11   | 33   | 52  | 47    | 1    | 20   | 47   |
| 344527  | 10   | 42   | 44   | 16   | 30   | 65   | 25   | 41   | 5   | 28    | 112  | 60   | 70   |
| 4372003 | 0    | 0    | 0    | 0    | 0    | 0    | 0    | 37   | 10  | 2     | 9    | 3    | 17   |
| 172464  | 0    | 0    | 0    | 0    | 0    | 0    | 0    | 0    | 212 | 3     | 2    | 158  | 1    |
| 289709  | 0    | 0    | 1    | 0    | 0    | 0    | 0    | 0    | 0   | 0     | 0    | 0    | 0    |
| 174854  | 130  | 39   | 13   | 87   | 21   | 15   | 5    | 7    | 48  | 4     | 2    | 16   | 15   |
| 830014  | 21   | 6    | 6    | 45   | 10   | 8    | 14   | 9    | 68  | 22    | 9    | 51   | 28   |
| 189666  | 16   | 5    | 2    | 14   | 9    | 19   | 5    | 2    | 15  | 3     | 0    | 3    | 5    |
| 304416  | 33   | 0    | 5    | 6    | 1    | 7    | 7    | 0    | 8   | 10    | 3    | 6    | 14   |
| 214835  | 43   | 9    | 6    | 23   | 18   | 13   | 10   | 0    | 8   | 3     | 17   | 3    | 0    |
| 260346  | 13   | 8    | 1    | 14   | 6    | 4    | 10   | 1    | 2   | 7     | 10   | 12   | 9    |
| 195445  | 49   | 31   | 41   | 100  | 27   | 89   | 52   | 4    | 31  | 1     | 0    | 0    | 0    |

Table S3 C

| ID      | R     | R.1   | R.2   | R.3   | R.4   | R.5   | R.6   | R.7   | R.8   | R.9   | R.10  | R.11  | R.12  |
|---------|-------|-------|-------|-------|-------|-------|-------|-------|-------|-------|-------|-------|-------|
| 263420  | 33    | 15    | 39    | 9     | 24    | 14    | 12    | 42    | 54    | 6     | 4     | 18    | 20    |
| 187959  | 27    | 2     | 18    | 7     | 21    | 7     | 5     | 15    | 17    | 4     | 11    | 7     | 20    |
| 199707  | 9     | 5     | 10    | 3     | 15    | 5     | 19    | 54    | 20    | 4     | 14    | 6     | 19    |
| 175485  | 3     | 1     | 1     | 13    | 0     | 10    | 7     | 22    | 31    | 5     | 26    | 44    | 149   |
| 193064  | 11    | 18    | 3     | 14    | 4     | 9     | 18    | 16    | 11    | 2     | 13    | 9     | 24    |
| 174285  | 38    | 5     | 2     | 27    | 0     | 0     | 0     | 2     | 32    | 8     | 12    | 2     | 7     |
| 1110752 | 185   | 618   | 966   | 696   | 124   | 183   | 68    | 1746  | 1143  | 488   | 1014  | 691   | 166   |
| 177414  | 38    | 11    | 49    | 14    | 35    | 12    | 9     | 18    | 59    | 7     | 15    | 6     | 26    |
| 882782  | 13    | 5     | 16    | 7     | 26    | 7     | 9     | 45    | 39    | 7     | 27    | 8     | 17    |
| 180465  | 9     | 2     | 0     | 1     | 1     | 4     | 6     | 5     | 12    | 1     | 6     | 2     | 8     |
| 1113553 | 0     | 0     | 0     | 0     | 0     | 2     | 3     | 0     | 2     | 0     | 1     | 0     | 1     |
| 347490  | 248   | 65    | 39    | 222   | 20    | 10    | 38    | 7     | 188   | 12    | 101   | 47    | 10    |
| 322991  | 33    | 20    | 127   | 29    | 35    | 15    | 11    | 14    | 2     | 13    | 2     | 0     | 2     |
| 4327628 | 0     | 0     | 0     | 0     | 0     | 0     | 0     | 0     | 0     | 0     | 0     | 0     | 0     |
| 819999  | 0     | 0     | 0     | 0     | 0     | 0     | 0     | 0     | 0     | 0     | 0     | 0     | 0     |
| 4402077 | 460   | 217   | 39    | 476   | 50    | 4     | 32    | 3     | 6     | 73    | 1     | 8     | 1     |
| 63144   | 1     | 20    | 3     | 66    | 2     | 1     | 4     | 1     | 2     | 0     | 1     | 2     | 0     |
| 233691  | 33    | 2     | 22    | 40    | 2     | 4     | 3     | 143   | 4     | 4     | 3     | 36    | 34    |
| 1108453 | 6     | 0     | 65    | 6     | 460   | 1515  | 265   | 564   | 174   | 36    | 20    | 177   | 13    |
| 38278   | 115   | 164   | 213   | 388   | 141   | 78    | 75    | 167   | 104   | 53    | 97    | 169   | 10    |
| 181419  | 9     | 4     | 4     | 14    | 0     | 2     | 1     | 1     | 2     | 0     | 9     | 5     | 6     |
| 183675  | 111   | 25    | 36    | 185   | 9     | 34    | 10    | 10    | 241   | 24    | 3     | 31    | 36    |
| 259901  | 1     | 0     | 0     | 0     | 2     | 0     | 2     | 2     | 3     | 14    | 1     | 19    | 178   |
| 322839  | 25    | 85    | 176   | 151   | 40    | 56    | 26    | 22    | 384   | 64    | 2     | 8     | 568   |
| 194388  | 111   | 78    | 7     | 52    | 5     | 16    | 44    | 12    | 83    | 20    | 129   | 25    | 68    |
| 307416  | 0     | 0     | 0     | 0     | 0     | 0     | 0     | 1     | 0     | 0     | 0     | 0     | 0     |
| 190063  | 0     | 0     | 1     | 0     | 12    | 1     | 4     | 2     | 74    | 0     | 0     | 63    | 17    |
| 313274  | 102   | 8     | 22    | 21    | 15    | 37    | 24    | 6     | 120   | 15    | 42    | 13    | 23    |
| 1136443 | 1403  | 21802 | 22355 | 2707  | 12958 | 33388 | 48498 | 29747 | 16267 | 22473 | 36801 | 30512 | 40251 |
| 421893  | 7     | 4     | 3     | 2     | 0     | 11    | 12    | 6     | 11    | 5     | 9     | 8     | 2     |
| 3325760 | 12    | 8     | 2     | 10    | 1     | 4     | 0     | 0     | 2     | 0     | 0     | 0     | 0     |
| 343130  | 144   | 17    | 8     | 44    | 10    | 26    | 55    | 1     | 2     | 0     | 193   | 0     | 3     |
| 174260  | 36    | 24    | 30    | 142   | 29    | 23    | 13    | 3     | 2     | 1     | 4     | 25    | 3     |
| 4453627 | 7     | 34    | 1     | 19    | 3     | 9     | 26    | 2     | 13    | 1     | 0     | 2     | 40    |
| 348785  | 6     | 2     | 0     | 2     | 0     | 14    | 3     | 3     | 15    | 2     | 1     | 4     | 2     |
| 189789  | 58    | 4     | 0     | 7     | 0     | 1     | 5     | 0     | 13    | 0     | 33    | 2     | 2     |
| 3056461 | 15    | 49    | 92    | 78    | 19    | 25    | 13    | 19    | 14    | 8     | 15    | 29    | 24    |
| 188785  | 0     | 0     | 0     | 0     | 0     | 0     | 0     | 0     | 1     | 1     | 1     | 0     | 4     |
| 354736  | 1     | 0     | 0     | 2     | 1     | 4     | 12    | 1     | 85    | 13    | 19    | 11    | 68    |
| 263953  | 8     | 21    | 2     | 12    | 1     | 0     | 2     | 0     | 0     | 6     | 5     | 1     | 1     |
| 635304  | 0     | 0     | 0     | 0     | 0     | 0     | 0     | 0     | 0     | 0     | 0     | 0     | 0     |
| 309663  | 13274 | 2984  | 1369  | 11543 | 1063  | 766   | 2609  | 0     | 15    | 3     | 6234  | 50    | 32    |
| 198604  | 20    | 13    | 20    | 25    | 18    | 5     | 7     | 5     | 10    | 1     | 0     | 1     | 1     |
| 205160  | 51    | 14    | 42    | 36    | 34    | 31    | 18    | 24    | 54    | 9     | 13    | 8     | 14    |
| 264657  | 0     | 0     | 1     | 0     | 2     | 4     | 4     | 3     | 11    | 1     | 1     | 0     | 3     |

Table S3 C

| ID      | R   | R.1 | R.2 | R.3  | R.4 | R.5 | R.6 | R.7 | R.8 | R.9 | R.10 | R.11 | R.12 |
|---------|-----|-----|-----|------|-----|-----|-----|-----|-----|-----|------|------|------|
| 273928  | 37  | 7   | 7   | 13   | 4   | 1   | 1   | 0   | 1   | 1   | 2    | 1    | 1    |
| 197025  | 0   | 0   | 0   | 1    | 0   | 0   | 0   | 0   | 1   | 0   | 0    | 1    | 0    |
| 157999  | 2   | 0   | 1   | 1    | 3   | 0   | 4   | 4   | 337 | 14  | 6    | 100  | 19   |
| 385545  | 58  | 114 | 26  | 38   | 4   | 37  | 29  | 24  | 50  | 10  | 14   | 21   | 3    |
| 186777  | 306 | 36  | 5   | 61   | 8   | 15  | 13  | 6   | 55  | 1   | 11   | 10   | 2    |
| 30067   | 0   | 0   | 3   | 3    | 0   | 2   | 0   | 0   | 31  | 1   | 2    | 22   | 1    |
| 177205  | 9   | 2   | 17  | 6    | 8   | 1   | 4   | 55  | 27  | 8   | 45   | 6    | 17   |
| 4401375 | 37  | 17  | 14  | 100  | 42  | 41  | 8   | 13  | 16  | 1   | 50   | 33   | 36   |
| 176139  | 4   | 1   | 0   | 1    | 1   | 0   | 1   | 5   | 37  | 6   | 1    | 16   | 0    |
| 3998912 | 0   | 0   | 0   | 0    | 0   | 0   | 0   | 24  | 636 | 639 | 13   | 674  | 425  |
| 175114  | 1   | 1   | 2   | 1    | 22  | 75  | 7   | 94  | 36  | 7   | 5    | 52   | 1    |
| 176868  | 1   | 0   | 0   | 1    | 0   | 0   | 0   | 6   | 0   | 0   | 0    | 0    | 26   |
| 191878  | 0   | 0   | 0   | 0    | 0   | 0   | 0   | 0   | 0   | 3   | 1    | 81   | 106  |
| 259195  | 12  | 2   | 7   | 2    | 3   | 27  | 6   | 2   | 2   | 7   | 12   | 1    | 8    |
| 174791  | 19  | 14  | 28  | 23   | 38  | 34  | 45  | 117 | 90  | 30  | 56   | 25   | 43   |
| 2624257 | 20  | 29  | 22  | 422  | 11  | 6   | 3   | 7   | 20  | 4   | 2    | 20   | 42   |
| 271734  | 9   | 4   | 0   | 20   | 4   | 1   | 1   | 0   | 2   | 5   | 6    | 10   | 4    |
| 174420  | 43  | 57  | 75  | 119  | 59  | 20  | 9   | 15  | 20  | 48  | 99   | 29   | 5    |
| 1517779 | 48  | 104 | 204 | 249  | 70  | 140 | 67  | 109 | 43  | 66  | 97   | 149  | 196  |
| 1108378 | 1   | 5   | 0   | 2    | 3   | 5   | 3   | 0   | 0   | 0   | 20   | 2    | 7    |
| 319816  | 44  | 44  | 15  | 58   | 61  | 24  | 8   | 20  | 27  | 0   | 2    | 5    | 21   |
| 606063  | 0   | 0   | 0   | 0    | 0   | 0   | 0   | 0   | 0   | 0   | 0    | 0    | 0    |
| 4420272 | 0   | 0   | 0   | 0    | 0   | 0   | 0   | 3   | 390 | 13  | 2    | 125  | 30   |
| 266091  | 9   | 1   | 0   | 4    | 1   | 0   | 0   | 0   | 0   | 0   | 0    | 2    | 1    |
| 177014  | 434 | 479 | 635 | 1221 | 296 | 123 | 74  | 137 | 471 | 42  | 109  | 127  | 153  |
| 2978254 | 16  | 8   | 74  | 96   | 6   | 31  | 187 | 41  | 3   | 281 | 475  | 135  | 40   |
| 51677   | 24  | 67  | 19  | 57   | 127 | 30  | 1   | 0   | 102 | 94  | 62   | 36   | 457  |
| 345211  | 55  | 53  | 21  | 56   | 59  | 19  | 6   | 14  | 26  | 4   | 2    | 8    | 12   |
| 4476330 | 7   | 2   | 1   | 48   | 6   | 0   | 6   | 0   | 1   | 2   | 0    | 4    | 6    |
| 113417  | 40  | 20  | 16  | 21   | 16  | 11  | 0   | 16  | 30  | 27  | 12   | 15   | 29   |
| 174651  | 24  | 0   | 2   | 8    | 0   | 5   | 3   | 0   | 83  | 10  | 5    | 5    | 42   |
| 263366  | 5   | 34  | 0   | 36   | 4   | 8   | 7   | 2   | 11  | 0   | 0    | 0    | 3    |
| 178068  | 1   | 5   | 5   | 5    | 8   | 1   | 4   | 1   | 1   | 6   | 6    | 0    | 0    |
| 273904  | 17  | 13  | 11  | 145  | 8   | 16  | 21  | 18  | 21  | 2   | 1    | 11   | 63   |
| 258559  | 890 | 4   | 35  | 301  | 581 | 674 | 696 | 38  | 1   | 2   | 98   | 97   | 32   |
| 2315700 | 18  | 73  | 62  | 18   | 33  | 113 | 94  | 37  | 71  | 18  | 60   | 69   | 45   |
| 4418586 | 6   | 0   | 0   | 0    | 0   | 1   | 0   | 85  | 153 | 5   | 0    | 435  | 296  |
| 276629  | 36  | 11  | 46  | 40   | 47  | 26  | 20  | 12  | 79  | 7   | 6    | 14   | 19   |
| 4424327 | 3   | 0   | 0   | 0    | 0   | 0   | 0   | 1   | 6   | 2   | 1    | 3    | 1    |
| 831301  | 1   | 11  | 4   | 15   | 5   | 4   | 10  | 11  | 29  | 6   | 22   | 10   | 63   |
| 190026  | 0   | 0   | 0   | 0    | 0   | 0   | 0   | 0   | 0   | 0   | 0    | 0    | 0    |
| 4476780 | 1   | 5   | 3   | 5    | 1   | 1   | 0   | 2   | 0   | 3   | 2    | 3    | 2    |
| 570367  | 294 | 101 | 45  | 298  | 44  | 24  | 37  | 8   | 47  | 3   | 64   | 25   | 23   |
| 210950  | 12  | 17  | 30  | 51   | 95  | 65  | 78  | 17  | 14  | 4   | 14   | 2    | 144  |
| 4366524 | 10  | 8   | 8   | 24   | 3   | 9   | 8   | 0   | 17  | 12  | 0    | 11   | 6    |

Table S3 C

| ID      | R   | R.1  | R.2 | R.3 | R.4 | R.5  | R.6 | R.7 | R.8  | R.9 | R.10 | R.11 | R.12 |
|---------|-----|------|-----|-----|-----|------|-----|-----|------|-----|------|------|------|
| 272192  | 3   | 1    | 0   | 1   | 1   | 8    | 3   | 2   | 10   | 0   | 14   | 19   | 15   |
| 136604  | 1   | 225  | 30  | 28  | 0   | 0    | 0   | 5   | 0    | 6   | 102  | 16   | 0    |
| 192316  | 131 | 127  | 165 | 323 | 82  | 39   | 34  | 49  | 159  | 21  | 30   | 52   | 58   |
| 2072645 | 0   | 0    | 0   | 0   | 0   | 0    | 0   | 0   | 0    | 0   | 0    | 0    | 0    |
| 181719  | 261 | 94   | 113 | 773 | 274 | 1232 | 347 | 115 | 418  | 67  | 259  | 596  | 795  |
| 292892  | 8   | 11   | 0   | 9   | 0   | 4    | 15  | 9   | 35   | 2   | 48   | 20   | 12   |
| 340600  | 0   | 0    | 0   | 0   | 0   | 0    | 0   | 0   | 0    | 0   | 0    | 0    | 1    |
| 261590  | 14  | 304  | 59  | 150 | 26  | 49   | 57  | 16  | 44   | 12  | 5    | 21   | 0    |
| 168984  | 70  | 6    | 7   | 107 | 5   | 30   | 29  | 20  | 1    | 1   | 0    | 0    | 0    |
| 1703712 | 203 | 64   | 90  | 541 | 206 | 361  | 102 | 36  | 129  | 16  | 81   | 218  | 216  |
| 264345  | 0   | 0    | 0   | 0   | 0   | 0    | 0   | 0   | 0    | 0   | 0    | 0    | 0    |
| 209845  | 10  | 3    | 63  | 32  | 4   | 12   | 1   | 4   | 35   | 7   | 5    | 100  | 58   |
| 198209  | 1   | 187  | 31  | 104 | 9   | 38   | 41  | 18  | 37   | 7   | 3    | 14   | 2    |
| 171532  | 3   | 0    | 0   | 1   | 4   | 1    | 11  | 25  | 81   | 11  | 0    | 5    | 0    |
| 299600  | 7   | 2    | 52  | 22  | 1   | 7    | 0   | 5   | 23   | 2   | 9    | 61   | 38   |
| 273967  | 0   | 0    | 0   | 0   | 0   | 0    | 0   | 0   | 29   | 5   | 20   | 15   | 7    |
| 4449984 | 2   | 7    | 1   | 3   | 0   | 1    | 11  | 2   | 3    | 0   | 2    | 4    | 0    |
| 325850  | 0   | 30   | 38  | 17  | 0   | 0    | 0   | 3   | 12   | 14  | 10   | 8    | 0    |
| 801260  | 0   | 0    | 0   | 0   | 0   | 1    | 0   | 3   | 1    | 11  | 3    | 3    | 1    |
| 259631  | 14  | 0    | 8   | 30  | 1   | 1    | 4   | 0   | 36   | 0   | 0    | 6    | 0    |
| 278609  | 289 | 116  | 338 | 273 | 87  | 615  | 396 | 118 | 2050 | 162 | 237  | 101  | 272  |
| 264155  | 2   | 6    | 1   | 1   | 2   | 1    | 6   | 1   | 2    | 7   | 1    | 0    | 0    |
| 333576  | 141 | 26   | 10  | 114 | 9   | 9    | 21  | 1   | 0    | 0   | 14   | 1    | 4    |
| 194665  | 263 | 43   | 8   | 60  | 2   | 2    | 0   | 2   | 0    | 1   | 50   | 2    | 16   |
| 194662  | 21  | 0    | 0   | 2   | 0   | 5    | 0   | 0   | 14   | 1   | 1    | 4    | 0    |
| 2897332 | 72  | 12   | 10  | 120 | 18  | 6    | 21  | 23  | 111  | 5   | 10   | 21   | 63   |
| 178490  | 0   | 0    | 0   | 0   | 0   | 0    | 0   | 4   | 0    | 2   | 0    | 10   | 0    |
| 262801  | 6   | 1    | 0   | 0   | 5   | 167  | 3   | 1   | 883  | 2   | 1    | 393  | 4    |
| 4471130 | 13  | 42   | 25  | 66  | 55  | 226  | 78  | 0   | 48   | 8   | 0    | 18   | 23   |
| 4471135 | 1   | 5    | 0   | 1   | 3   | 0    | 1   | 1   | 8    | 0   | 6    | 3    | 3    |
| 259275  | 14  | 10   | 16  | 25  | 11  | 3    | 4   | 0   | 2    | 0   | 1    | 3    | 11   |
| 198194  | 96  | 9    | 28  | 153 | 38  | 81   | 129 | 10  | 55   | 69  | 5    | 60   | 106  |
| 575261  | 132 | 45   | 11  | 131 | 17  | 11   | 21  | 2   | 28   | 4   | 43   | 12   | 4    |
| 258849  | 68  | 311  | 445 | 378 | 188 | 71   | 83  | 150 | 273  | 72  | 76   | 125  | 87   |
| 4045882 | 0   | 0    | 0   | 0   | 0   | 0    | 0   | 0   | 0    | 0   | 0    | 0    | 1    |
| 177917  | 13  | 4    | 18  | 22  | 18  | 1    | 3   | 3   | 6    | 1   | 0    | 2    | 2    |
| 298973  | 72  | 60   | 2   | 39  | 7   | 1    | 7   | 2   | 10   | 3   | 18   | 2    | 10   |
| 835456  | 3   | 21   | 26  | 52  | 2   | 9    | 4   | 13  | 9    | 6   | 1    | 15   | 5    |
| 276663  | 25  | 19   | 11  | 53  | 10  | 20   | 9   | 8   | 10   | 67  | 1    | 6    | 19   |
| 3868285 | 285 | 1137 | 75  | 253 | 9   | 1042 | 994 | 261 | 1078 | 105 | 3    | 446  | 3    |
| 276484  | 0   | 0    | 1   | 1   | 0   | 4    | 0   | 1   | 1    | 1   | 0    | 0    | 0    |
| 192598  | 47  | 70   | 50  | 126 | 35  | 44   | 46  | 43  | 42   | 61  | 14   | 64   | 78   |
| 4343528 | 114 | 59   | 14  | 49  | 6   | 6    | 3   | 5   | 36   | 64  | 55   | 16   | 12   |
| 260233  | 1   | 0    | 3   | 0   | 10  | 75   | 24  | 13  | 41   | 3   | 52   | 28   | 5    |
| 174770  | 181 | 6    | 0   | 8   | 1   | 1    | 2   | 1   | 11   | 3   | 9    | 5    | 18   |

Table S3 C

| ID      | R    | R.1 | R.2 | R.3  | R.4  | R.5 | R.6 | R.7  | R.8  | R.9  | R.10 | R.11 | R.12 |
|---------|------|-----|-----|------|------|-----|-----|------|------|------|------|------|------|
| 272953  | 27   | 1   | 1   | 19   | 1    | 0   | 2   | 0    | 3    | 0    | 5    | 2    | 2    |
| 176886  | 25   | 28  | 55  | 27   | 30   | 16  | 19  | 35   | 48   | 17   | 11   | 11   | 12   |
| 4466618 | 0    | 0   | 0   | 0    | 0    | 0   | 0   | 0    | 0    | 0    | 0    | 0    | 0    |
| 259870  | 0    | 0   | 0   | 0    | 0    | 0   | 0   | 0    | 63   | 0    | 0    | 1    | 0    |
| 4450025 | 0    | 0   | 0   | 0    | 0    | 0   | 3   | 19   | 2    | 0    | 1    | 2    | 0    |
| 661055  | 0    | 0   | 0   | 0    | 0    | 0   | 0   | 0    | 6    | 0    | 0    | 0    | 0    |
| 210292  | 187  | 166 | 108 | 299  | 84   | 119 | 196 | 28   | 51   | 66   | 109  | 186  | 291  |
| 166099  | 4    | 17  | 17  | 14   | 2    | 6   | 1   | 3    | 3    | 1    | 1    | 14   | 5    |
| 345582  | 19   | 2   | 5   | 4    | 0    | 14  | 3   | 1    | 10   | 7    | 3    | 3    | 14   |
| 261334  | 15   | 5   | 0   | 5    | 1    | 15  | 2   | 3    | 3    | 1    | 11   | 3    | 3    |
| 136783  | 12   | 5   | 3   | 4    | 0    | 16  | 7   | 6    | 13   | 2    | 5    | 11   | 12   |
| 314424  | 21   | 69  | 8   | 22   | 0    | 1   | 15  | 1    | 1    | 4    | 65   | 0    | 2    |
| 771140  | 0    | 1   | 0   | 0    | 0    | 0   | 0   | 50   | 2    | 2    | 1    | 6    | 0    |
| 177930  | 1    | 8   | 1   | 2    | 0    | 5   | 6   | 0    | 9    | 1    | 1    | 1    | 1    |
| 274095  | 0    | 1   | 14  | 13   | 0    | 1   | 1   | 3    | 18   | 2    | 0    | 0    | 1    |
| 185519  | 6    | 4   | 0   | 19   | 2    | 2   | 1   | 3    | 4    | 0    | 1    | 3    | 0    |
| 162639  | 154  | 79  | 90  | 345  | 30   | 17  | 45  | 67   | 155  | 134  | 96   | 29   | 116  |
| 578649  | 228  | 91  | 31  | 160  | 24   | 26  | 20  | 4    | 42   | 7    | 32   | 14   | 3    |
| 312311  | 64   | 21  | 6   | 125  | 6    | 7   | 9   | 0    | 28   | 3    | 16   | 5    | 48   |
| 569522  | 1658 | 533 | 223 | 1499 | 311  | 166 | 203 | 66   | 349  | 27   | 375  | 143  | 83   |
| 2212505 | 421  | 409 | 817 | 880  | 1178 | 518 | 816 | 1616 | 1315 | 302  | 872  | 480  | 681  |
| 214120  | 11   | 2   | 16  | 5    | 12   | 4   | 0   | 10   | 16   | 2    | 3    | 3    | 9    |
| 258411  | 108  | 4   | 3   | 14   | 3    | 9   | 4   | 2    | 14   | 4    | 20   | 5    | 4    |
| 4371295 | 74   | 68  | 8   | 50   | 5    | 3   | 5   | 5    | 10   | 4    | 22   | 1    | 18   |
| 2797565 | 3    | 9   | 17  | 16   | 0    | 6   | 7   | 16   | 18   | 20   | 14   | 26   | 1    |
| 1991255 | 48   | 5   | 1   | 22   | 3    | 2   | 1   | 0    | 9    | 12   | 11   | 7    | 5    |
| 261350  | 1    | 0   | 2   | 0    | 3    | 3   | 0   | 2    | 3    | 2    | 1    | 1    | 3    |
| 14035   | 141  | 35  | 7   | 103  | 24   | 24  | 14  | 15   | 47   | 3    | 0    | 43   | 22   |
| 264325  | 25   | 114 | 267 | 295  | 89   | 6   | 67  | 77   | 1    | 25   | 18   | 0    | 1    |
| 437137  | 105  | 191 | 176 | 208  | 209  | 66  | 62  | 123  | 437  | 44   | 29   | 218  | 9    |
| 4481359 | 111  | 32  | 11  | 109  | 13   | 12  | 24  | 0    | 12   | 2    | 34   | 23   | 37   |
| 112720  | 15   | 58  | 97  | 82   | 39   | 5   | 11  | 18   | 1    | 6    | 3    | 1    | 2    |
| 311788  | 218  | 285 | 436 | 472  | 474  | 196 | 127 | 346  | 442  | 76   | 77   | 218  | 304  |
| 833381  | 9    | 2   | 1   | 5    | 4    | 16  | 4   | 2    | 8    | 1    | 3    | 6    | 5    |
| 177952  | 28   | 21  | 31  | 86   | 24   | 26  | 33  | 23   | 57   | 2    | 34   | 90   | 30   |
| 4483264 | 12   | 5   | 1   | 6    | 1    | 12  | 9   | 7    | 33   | 8    | 5    | 9    | 8    |
| 310781  | 0    | 0   | 0   | 0    | 15   | 5   | 9   | 0    | 0    | 6    | 6    | 0    | 0    |
| 4477372 | 41   | 1   | 0   | 7    | 7    | 7   | 9   | 1    | 3    | 0    | 3    | 0    | 3    |
| 342685  | 3    | 14  | 7   | 26   | 0    | 8   | 4   | 17   | 3    | 3    | 0    | 0    | 5    |
| 4413888 | 1    | 1   | 26  | 94   | 0    | 0   | 4   | 7    | 7658 | 5047 | 13   | 1769 | 534  |
| 273091  | 6    | 16  | 5   | 106  | 11   | 2   | 6   | 9    | 130  | 7    | 0    | 17   | 4    |
| 324013  | 51   | 8   | 20  | 12   | 26   | 36  | 21  | 13   | 88   | 12   | 16   | 24   | 19   |
| 177371  | 31   | 136 | 248 | 158  | 94   | 31  | 27  | 27   | 1    | 33   | 52   | 2    | 3    |
| 4393892 | 39   | 12  | 4   | 47   | 7    | 3   | 19  | 0    | 4    | 2    | 9    | 14   | 0    |
| 4378477 | 4    | 148 | 28  | 314  | 34   | 10  | 12  | 1    | 8    | 0    | 2    | 4    | 2    |

Table S3 C

| ID      | R   | R.1 | R.2 | R.3  | R.4 | R.5 | R.6 | R.7 | R.8 | R.9 | R.10 | R.11 | R.12 |
|---------|-----|-----|-----|------|-----|-----|-----|-----|-----|-----|------|------|------|
| 4327763 | 2   | 1   | 0   | 1    | 1   | 1   | 2   | 1   | 5   | 0   | 4    | 2    | 0    |
| 1902400 | 34  | 29  | 13  | 33   | 6   | 18  | 17  | 30  | 266 | 2   | 10   | 28   | 32   |
| 181091  | 3   | 1   | 0   | 1    | 3   | 0   | 1   | 1   | 48  | 5   | 1    | 19   | 4    |
| 4384058 | 0   | 0   | 0   | 0    | 0   | 0   | 0   | 0   | 0   | 0   | 0    | 0    | 0    |
| 1112373 | 26  | 5   | 20  | 17   | 14  | 1   | 0   | 0   | 2   | 0   | 4    | 1    | 3    |
| 180879  | 451 | 54  | 30  | 220  | 24  | 162 | 136 | 7   | 115 | 20  | 61   | 106  | 71   |
| 356226  | 29  | 1   | 14  | 4    | 12  | 5   | 9   | 3   | 67  | 2   | 10   | 4    | 14   |
| 197706  | 2   | 0   | 1   | 0    | 0   | 2   | 0   | 0   | 9   | 2   | 0    | 4    | 0    |
| 264468  | 0   | 0   | 0   | 1    | 0   | 1   | 0   | 0   | 844 | 154 | 144  | 1022 | 83   |
| 186549  | 23  | 5   | 2   | 18   | 2   | 23  | 17  | 2   | 6   | 4   | 21   | 4    | 2    |
| 185550  | 119 | 123 | 184 | 265  | 148 | 66  | 55  | 106 | 372 | 35  | 68   | 63   | 226  |
| 177748  | 62  | 2   | 1   | 5    | 2   | 2   | 7   | 1   | 2   | 5   | 11   | 2    | 8    |
| 189309  | 0   | 1   | 6   | 28   | 0   | 15  | 15  | 114 | 24  | 12  | 11   | 13   | 4    |
| 688800  | 22  | 37  | 30  | 93   | 11  | 14  | 17  | 20  | 17  | 17  | 2    | 24   | 22   |
| 3013444 | 98  | 400 | 395 | 1177 | 506 | 255 | 97  | 384 | 6   | 53  | 208  | 54   | 227  |
| 174056  | 28  | 51  | 184 | 119  | 140 | 66  | 53  | 88  | 97  | 7   | 10   | 15   | 230  |
| 583266  | 24  | 16  | 8   | 13   | 2   | 12  | 6   | 5   | 27  | 3   | 10   | 4    | 2    |
| 180077  | 95  | 407 | 802 | 507  | 312 | 188 | 242 | 338 | 10  | 286 | 426  | 21   | 18   |
| 813805  | 0   | 0   | 0   | 1    | 0   | 0   | 0   | 0   | 0   | 0   | 0    | 0    | 0    |
| 381666  | 42  | 97  | 150 | 248  | 15  | 31  | 34  | 18  | 33  | 30  | 59   | 2    | 0    |
| 4449524 | 1   | 156 | 62  | 72   | 0   | 0   | 0   | 94  | 3   | 149 | 118  | 4    | 17   |
| 4441792 | 1   | 77  | 8   | 319  | 16  | 7   | 7   | 2   | 11  | 0   | 2    | 2    | 2    |
| 259006  | 0   | 0   | 0   | 0    | 0   | 0   | 0   | 0   | 6   | 6   | 0    | 1    | 0    |
| 190114  | 0   | 0   | 0   | 0    | 0   | 0   | 0   | 6   | 0   | 0   | 0    | 0    | 0    |
| 175227  | 4   | 1   | 0   | 2    | 13  | 3   | 1   | 0   | 0   | 3   | 0    | 18   | 3    |
| 4464787 | 1   | 0   | 0   | 0    | 0   | 0   | 0   | 585 | 13  | 35  | 3    | 362  | 174  |
| 4433554 | 11  | 5   | 8   | 21   | 0   | 14  | 4   | 5   | 319 | 1   | 9    | 22   | 5    |
| 228798  | 6   | 13  | 21  | 20   | 6   | 6   | 2   | 0   | 0   | 1   | 4    | 0    | 0    |
| 1109929 | 2   | 3   | 7   | 10   | 4   | 4   | 2   | 0   | 0   | 4   | 67   | 51   | 0    |
| 191098  | 91  | 9   | 8   | 59   | 12  | 11  | 10  | 10  | 7   | 12  | 8    | 5    | 41   |
| 196664  | 19  | 3   | 11  | 9    | 12  | 52  | 21  | 12  | 20  | 3   | 35   | 38   | 89   |
| 279026  | 41  | 40  | 20  | 76   | 26  | 37  | 29  | 7   | 51  | 34  | 5    | 5    | 24   |
| 179958  | 37  | 36  | 54  | 109  | 23  | 7   | 5   | 10  | 20  | 7   | 3    | 7    | 13   |
| 206324  | 46  | 5   | 27  | 5    | 51  | 14  | 10  | 9   | 47  | 4   | 0    | 7    | 6    |
| 174071  | 27  | 40  | 8   | 53   | 10  | 8   | 1   | 2   | 3   | 0   | 0    | 2    | 0    |
| 288128  | 23  | 3   | 6   | 14   | 5   | 8   | 9   | 0   | 7   | 4   | 5    | 10   | 14   |
| 4453609 | 3   | 6   | 11  | 12   | 1   | 0   | 0   | 0   | 1   | 4   | 0    | 1    | 0    |
| 356164  | 28  | 12  | 95  | 15   | 16  | 13  | 21  | 78  | 42  | 9   | 27   | 47   | 63   |
| 577170  | 5   | 1   | 4   | 5    | 1   | 6   | 6   | 23  | 23  | 5   | 21   | 41   | 132  |
| 185125  | 261 | 63  | 18  | 185  | 22  | 46  | 56  | 8   | 201 | 26  | 51   | 102  | 84   |
| 185126  | 1   | 3   | 2   | 2    | 40  | 8   | 30  | 10  | 348 | 4   | 1    | 385  | 65   |
| 130663  | 21  | 19  | 12  | 139  | 33  | 101 | 18  | 28  | 11  | 2   | 31   | 16   | 26   |
| 277200  | 183 | 40  | 17  | 105  | 7   | 10  | 8   | 8   | 51  | 14  | 43   | 29   | 39   |
| 4364243 | 32  | 10  | 9   | 51   | 3   | 4   | 2   | 0   | 5   | 1   | 0    | 1    | 0    |
| 182470  | 10  | 0   | 0   | 1    | 1   | 3   | 0   | 1   | 0   | 1   | 3    | 10   | 0    |

Table S3 C

| ID      | R   | R.1  | R.2  | R.3  | R.4 | R.5 | R.6 | R.7 | R.8 | R.9 | R.10 | R.11 | R.12 |
|---------|-----|------|------|------|-----|-----|-----|-----|-----|-----|------|------|------|
| 166718  | 52  | 314  | 270  | 222  | 183 | 33  | 55  | 0   | 28  | 2   | 0    | 6    | 3    |
| 176008  | 17  | 6    | 3    | 6    | 5   | 14  | 13  | 6   | 16  | 1   | 13   | 15   | 5    |
| 1106101 | 0   | 3    | 8    | 1    | 0   | 1   | 2   | 0   | 0   | 0   | 1    | 0    | 4    |
| 584137  | 37  | 17   | 19   | 34   | 27  | 26  | 15  | 0   | 35  | 7   | 43   | 12   | 5    |
| 268384  | 4   | 112  | 11   | 221  | 18  | 5   | 4   | 2   | 4   | 0   | 1    | 6    | 2    |
| 332608  | 166 | 32   | 206  | 183  | 29  | 140 | 67  | 7   | 66  | 66  | 110  | 41   | 156  |
| 303251  | 4   | 4    | 57   | 21   | 5   | 31  | 13  | 56  | 0   | 394 | 22   | 29   | 0    |
| 214919  | 1   | 8    | 22   | 14   | 78  | 71  | 155 | 0   | 131 | 58  | 31   | 6    | 1    |
| 267388  | 46  | 37   | 23   | 28   | 62  | 265 | 50  | 12  | 117 | 13  | 204  | 4    | 368  |
| 187181  | 1   | 0    | 0    | 0    | 0   | 0   | 0   | 0   | 0   | 0   | 0    | 0    | 0    |
| 228556  | 0   | 0    | 0    | 0    | 0   | 0   | 0   | 0   | 0   | 0   | 0    | 0    | 0    |
| 129990  | 759 | 1670 | 3076 | 2188 | 834 | 624 | 522 | 172 | 3   | 512 | 20   | 2    | 1    |
| 271572  | 34  | 2    | 2    | 11   | 1   | 25  | 17  | 1   | 0   | 0   | 9    | 0    | 0    |
| 3197419 | 64  | 6    | 0    | 35   | 2   | 2   | 10  | 0   | 14  | 1   | 14   | 3    | 14   |
| 187233  | 3   | 61   | 7    | 132  | 0   | 6   | 10  | 1   | 4   | 1   | 1    | 14   | 2    |
| 420168  | 0   | 0    | 0    | 0    | 1   | 18  | 7   | 5   | 40  | 3   | 3    | 4    | 12   |
| 189346  | 56  | 0    | 1    | 14   | 1   | 1   | 0   | 1   | 16  | 3   | 2    | 2    | 2    |
| 4472195 | 41  | 30   | 40   | 82   | 22  | 27  | 24  | 16  | 66  | 16  | 30   | 73   | 22   |
| 199137  | 26  | 1    | 1    | 10   | 8   | 15  | 4   | 7   | 0   | 1   | 14   | 4    | 6    |
| 264294  | 5   | 0    | 0    | 3    | 0   | 1   | 0   | 0   | 0   | 0   | 1    | 5    | 0    |
| 268844  | 17  | 8    | 3    | 2    | 2   | 14  | 22  | 31  | 61  | 13  | 9    | 11   | 10   |
| 179427  | 4   | 7    | 32   | 8    | 11  | 3   | 2   | 20  | 6   | 7   | 13   | 0    | 2    |
| 179426  | 62  | 13   | 16   | 24   | 17  | 9   | 4   | 0   | 3   | 3   | 10   | 5    | 0    |
| 331411  | 237 | 43   | 32   | 153  | 24  | 12  | 48  | 3   | 3   | 0   | 118  | 3    | 3    |
| 230268  | 41  | 1    | 4    | 11   | 2   | 8   | 4   | 11  | 11  | 3   | 11   | 27   | 0    |
| 271439  | 134 | 28   | 9    | 68   | 10  | 9   | 22  | 1   | 26  | 0   | 3    | 7    | 10   |
| 310760  | 20  | 9    | 2    | 35   | 1   | 0   | 3   | 1   | 16  | 0   | 4    | 0    | 4    |
| 170335  | 57  | 235  | 152  | 263  | 220 | 64  | 39  | 7   | 13  | 3   | 4    | 64   | 16   |
| 189476  | 25  | 36   | 70   | 122  | 17  | 9   | 11  | 29  | 18  | 10  | 17   | 394  | 482  |



Table S3 D. WT (W) mice

| ID      | W    | W.1  | W.2  | W.3 | W.4 | W.5  | W.6 |
|---------|------|------|------|-----|-----|------|-----|
| 181348  | 1    | 18   | 59   | 83  | 0   | 72   | 52  |
| 3957916 | 14   | 0    | 0    | 1   | 0   | 68   | 11  |
| 244484  | 37   | 0    | 2    | 3   | 0   | 12   | 4   |
| 1111328 | 4    | 0    | 3    | 0   | 0   | 0    | 0   |
| 197452  | 283  | 7    | 88   | 27  | 0   | 0    | 0   |
| 269815  | 2    | 0    | 0    | 2   | 0   | 1    | 2   |
| 363383  | 0    | 0    | 0    | 0   | 0   | 0    | 0   |
| 175080  | 0    | 0    | 1    | 4   | 7   | 3    | 39  |
| 179853  | 15   | 15   | 0    | 1   | 0   | 2    | 0   |
| 183089  | 0    | 0    | 0    | 0   | 0   | 0    | 0   |
| 263171  | 0    | 0    | 0    | 0   | 0   | 0    | 0   |
| 192222  | 2486 | 2433 | 294  | 242 | 201 | 104  | 128 |
| 276509  | 6    | 0    | 0    | 4   | 7   | 3    | 25  |
| 423455  | 110  | 0    | 87   | 135 | 5   | 53   | 114 |
| 267502  | 5    | 0    | 30   | 59  | 0   | 31   | 5   |
| 172163  | 5    | 2    | 0    | 46  | 108 | 37   | 74  |
| 828435  | 0    | 0    | 0    | 0   | 0   | 0    | 0   |
| 289306  | 6    | 2    | 1    | 6   | 0   | 1    | 3   |
| 290253  | 7    | 6    | 3    | 2   | 0   | 0    | 3   |
| 216495  | 3    | 3    | 6    | 4   | 5   | 8    | 24  |
| 4329450 | 0    | 1    | 0    | 1   | 1   | 0    | 1   |
| 271418  | 17   | 23   | 15   | 32  | 15  | 24   | 16  |
| 206817  | 0    | 0    | 2    | 2   | 2   | 1    | 1   |
| 197891  | 0    | 0    | 0    | 1   | 1   | 0    | 7   |
| 205134  | 22   | 20   | 11   | 15  | 36  | 16   | 27  |
| 4352747 | 14   | 117  | 6    | 8   | 79  | 10   | 2   |
| 182043  | 5    | 6    | 0    | 2   | 0   | 14   | 2   |
| 274297  | 197  | 141  | 88   | 116 | 0   | 62   | 52  |
| 197782  | 5    | 3    | 3    | 2   | 0   | 4    | 1   |
| 1105328 | 4    | 0    | 12   | 30  | 0   | 13   | 3   |
| 274438  | 5    | 5    | 3    | 5   | 0   | 3    | 8   |
| 191948  | 40   | 196  | 2017 | 907 | 1   | 1284 | 301 |
| 429917  | 1    | 6    | 65   | 66  | 1   | 26   | 320 |
| 22659   | 0    | 0    | 145  | 37  | 60  | 113  | 70  |
| 187272  | 0    | 0    | 6    | 24  | 0   | 1    | 0   |
| 277388  | 4    | 2    | 0    | 1   | 0   | 7    | 0   |
| 318079  | 0    | 0    | 0    | 0   | 0   | 0    | 0   |
| 148056  | 0    | 0    | 0    | 0   | 0   | 0    | 0   |
| 270385  | 6    | 6    | 5    | 16  | 0   | 6    | 17  |
| 270382  | 0    | 0    | 0    | 0   | 0   | 0    | 1   |
| 301233  | 2    | 1    | 0    | 3   | 1   | 0    | 0   |
| 10518   | 0    | 0    | 0    | 0   | 0   | 0    | 0   |
| 827195  | 1    | 1    | 0    | 0   | 121 | 0    | 0   |
| 10512   | 0    | 0    | 3    | 2   | 7   | 1    | 1   |

Table S3 D

| ID      | W    | W.1  | W.2 | W.3  | W.4 | W.5 | W.6 |
|---------|------|------|-----|------|-----|-----|-----|
| 338640  | 10   | 1    | 2   | 5    | 1   | 3   | 2   |
| 752584  | 0    | 0    | 0   | 0    | 0   | 0   | 0   |
| 198998  | 5    | 0    | 0   | 1    | 0   | 0   | 0   |
| 4357147 | 26   | 6    | 0   | 5    | 6   | 2   | 1   |
| 196122  | 4    | 17   | 220 | 90   | 0   | 100 | 19  |
| 839200  | 0    | 0    | 36  | 12   | 0   | 21  | 0   |
| 4483037 | 23   | 32   | 18  | 23   | 0   | 22  | 22  |
| 376862  | 0    | 0    | 78  | 3    | 0   | 8   | 17  |
| 148671  | 0    | 0    | 1   | 1    | 0   | 3   | 2   |
| 194504  | 2    | 0    | 0   | 0    | 0   | 0   | 0   |
| 4442899 | 1    | 0    | 0   | 4    | 0   | 0   | 5   |
| 278712  | 1    | 0    | 0   | 6    | 3   | 3   | 7   |
| 4469233 | 4    | 0    | 19  | 26   | 0   | 5   | 7   |
| 184484  | 266  | 62   | 1   | 3    | 0   | 93  | 36  |
| 655793  | 21   | 0    | 24  | 22   | 0   | 40  | 19  |
| 405780  | 24   | 7    | 27  | 18   | 0   | 86  | 26  |
| 174824  | 10   | 7    | 0   | 0    | 0   | 0   | 0   |
| 181193  | 0    | 1    | 0   | 1    | 0   | 4   | 1   |
| 3974550 | 0    | 0    | 42  | 8    | 13  | 24  | 11  |
| 173916  | 0    | 0    | 0   | 0    | 0   | 90  | 15  |
| 197623  | 379  | 1221 | 883 | 792  | 523 | 491 | 284 |
| 628218  | 10   | 0    | 2   | 2    | 0   | 3   | 4   |
| 175706  | 216  | 73   | 127 | 124  | 0   | 32  | 84  |
| 183106  | 6    | 10   | 3   | 4    | 105 | 9   | 22  |
| 267958  | 0    | 0    | 0   | 0    | 0   | 0   | 0   |
| 189288  | 58   | 40   | 10  | 33   | 0   | 12  | 8   |
| 177621  | 498  | 3    | 38  | 170  | 2   | 1   | 0   |
| 829240  | 0    | 0    | 0   | 0    | 0   | 0   | 0   |
| 2645488 | 9    | 2    | 314 | 158  | 0   | 1   | 1   |
| 186886  | 135  | 52   | 15  | 49   | 1   | 0   | 0   |
| 210262  | 0    | 0    | 2   | 2    | 0   | 3   | 2   |
| 271822  | 121  | 2    | 13  | 23   | 0   | 45  | 12  |
| 196746  | 32   | 23   | 11  | 27   | 0   | 20  | 6   |
| 179343  | 6    | 7    | 5   | 8    | 57  | 9   | 20  |
| 4435934 | 1    | 5    | 19  | 21   | 0   | 17  | 6   |
| 746679  | 26   | 39   | 0   | 0    | 0   | 1   | 0   |
| 4481506 | 1581 | 3944 | 462 | 911  | 775 | 0   | 1   |
| 4357315 | 2    | 2    | 1   | 5    | 0   | 0   | 0   |
| 452014  | 0    | 0    | 0   | 0    | 0   | 0   | 0   |
| 68844   | 51   | 1    | 7   | 40   | 0   | 0   | 0   |
| 272593  | 44   | 8    | 21  | 59   | 187 | 246 | 8   |
| 182995  | 228  | 99   | 354 | 1011 | 437 | 492 | 233 |
| 4383135 | 1    | 1    | 0   | 0    | 0   | 0   | 0   |
| 328143  | 2    | 0    | 1   | 0    | 0   | 1   | 19  |
| 185614  | 8    | 1    | 15  | 27   | 39  | 20  | 85  |

Table S3 D

| ID      | W   | W.1  | W.2 | W.3 | W.4  | W.5  | W.6 |
|---------|-----|------|-----|-----|------|------|-----|
| 4378081 | 9   | 23   | 3   | 6   | 42   | 1    | 2   |
| 162539  | 901 | 8    | 0   | 0   | 0    | 311  | 296 |
| 4459184 | 0   | 0    | 0   | 0   | 0    | 0    | 0   |
| 586453  | 3   | 0    | 6   | 23  | 384  | 31   | 6   |
| 827487  | 5   | 3    | 0   | 0   | 0    | 0    | 0   |
| 184966  | 13  | 0    | 0   | 0   | 0    | 0    | 0   |
| 209028  | 0   | 1    | 0   | 1   | 2    | 0    | 0   |
| 197600  | 16  | 0    | 23  | 10  | 0    | 7    | 7   |
| 4446120 | 39  | 261  | 29  | 108 | 0    | 1    | 1   |
| 356187  | 0   | 0    | 0   | 0   | 0    | 0    | 1   |
| 1108078 | 0   | 0    | 22  | 123 | 0    | 0    | 0   |
| 1105589 | 2   | 0    | 6   | 8   | 16   | 2    | 38  |
| 4342104 | 35  | 9    | 4   | 8   | 7    | 1    | 2   |
| 180476  | 4   | 3    | 45  | 52  | 0    | 16   | 8   |
| 4335302 | 18  | 1    | 0   | 0   | 0    | 2    | 30  |
| 158302  | 0   | 105  | 0   | 5   | 52   | 4    | 2   |
| 445144  | 7   | 0    | 31  | 59  | 7    | 6    | 17  |
| 184753  | 2   | 0    | 0   | 1   | 5    | 0    | 0   |
| 192712  | 190 | 141  | 214 | 305 | 710  | 299  | 360 |
| 4414242 | 5   | 0    | 6   | 10  | 0    | 22   | 6   |
| 255098  | 0   | 0    | 5   | 3   | 1    | 4    | 1   |
| 173892  | 28  | 19   | 7   | 12  | 0    | 6    | 0   |
| 4329776 | 2   | 0    | 5   | 9   | 4    | 3    | 3   |
| 4483585 | 0   | 0    | 0   | 1   | 0    | 0    | 0   |
| 114111  | 124 | 89   | 38  | 37  | 120  | 23   | 54  |
| 214715  | 4   | 6    | 11  | 4   | 6    | 2    | 3   |
| 262159  | 44  | 2    | 1   | 17  | 0    | 60   | 17  |
| 277364  | 99  | 991  | 99  | 226 | 796  | 94   | 209 |
| 195433  | 0   | 1    | 0   | 0   | 5    | 0    | 1   |
| 4449236 | 69  | 74   | 28  | 50  | 748  | 52   | 88  |
| 269401  | 17  | 7    | 3   | 3   | 0    | 0    | 2   |
| 261177  | 17  | 0    | 212 | 369 | 1089 | 122  | 265 |
| 261178  | 0   | 0    | 0   | 0   | 0    | 0    | 0   |
| 190673  | 98  | 170  | 94  | 127 | 146  | 83   | 41  |
| 176836  | 39  | 0    | 16  | 15  | 0    | 0    | 2   |
| 188116  | 26  | 0    | 8   | 45  | 0    | 53   | 14  |
| 234121  | 2   | 6045 | 0   | 0   | 0    | 0    | 0   |
| 144207  | 0   | 0    | 4   | 0   | 2    | 1    | 0   |
| 188786  | 9   | 1    | 1   | 0   | 4    | 0    | 2   |
| 196856  | 6   | 4    | 3   | 9   | 5    | 55   | 9   |
| 214116  | 39  | 125  | 9   | 3   | 30   | 8    | 8   |
| 265047  | 0   | 0    | 1   | 0   | 0    | 0    | 0   |
| 415491  | 16  | 13   | 7   | 14  | 1    | 4    | 1   |
| 4390365 | 0   | 0    | 0   | 0   | 0    | 0    | 0   |
| 174667  | 715 | 489  | 56  | 175 | 1    | 1967 | 545 |

Table S3 D

| ID      | W    | W.1 | W.2 | W.3 | W.4  | W.5  | W.6  |
|---------|------|-----|-----|-----|------|------|------|
| 2901239 | 0    | 0   | 0   | 0   | 2    | 0    | 0    |
| 273687  | 5    | 0   | 2   | 5   | 0    | 0    | 4    |
| 319165  | 1    | 1   | 0   | 3   | 7    | 7    | 2    |
| 269426  | 4    | 4   | 0   | 1   | 0    | 5    | 0    |
| 270303  | 42   | 17  | 20  | 14  | 1    | 20   | 29   |
| 329271  | 39   | 0   | 0   | 0   | 0    | 17   | 31   |
| 198024  | 5    | 0   | 1   | 1   | 0    | 1    | 2    |
| 896545  | 2    | 25  | 0   | 0   | 0    | 0    | 0    |
| 263705  | 128  | 0   | 0   | 0   | 0    | 38   | 28   |
| 174418  | 85   | 1   | 1   | 0   | 2    | 31   | 48   |
| 174417  | 0    | 0   | 0   | 0   | 0    | 0    | 0    |
| 184329  | 25   | 6   | 25  | 43  | 32   | 29   | 116  |
| 192342  | 1    | 0   | 0   | 0   | 0    | 0    | 0    |
| 4453773 | 0    | 1   | 0   | 1   | 6    | 0    | 0    |
| 372473  | 0    | 1   | 0   | 0   | 0    | 0    | 0    |
| 199698  | 20   | 32  | 12  | 21  | 50   | 10   | 24   |
| 191067  | 302  | 2   | 83  | 266 | 3888 | 266  | 157  |
| 453896  | 16   | 9   | 11  | 16  | 5    | 3    | 11   |
| 179548  | 25   | 29  | 10  | 15  | 7    | 12   | 8    |
| 179547  | 317  | 214 | 15  | 16  | 2    | 24   | 15   |
| 113978  | 0    | 0   | 0   | 0   | 0    | 0    | 0    |
| 3449666 | 0    | 0   | 25  | 15  | 79   | 4    | 2    |
| 4468234 | 0    | 0   | 10  | 4   | 42   | 1    | 1    |
| 4466275 | 10   | 0   | 9   | 11  | 0    | 17   | 6    |
| 186742  | 152  | 82  | 3   | 8   | 17   | 19   | 11   |
| 308332  | 63   | 47  | 0   | 0   | 0    | 0    | 0    |
| 318819  | 3    | 0   | 0   | 5   | 0    | 0    | 0    |
| 4379449 | 0    | 0   | 0   | 0   | 0    | 0    | 0    |
| 105109  | 0    | 0   | 1   | 2   | 0    | 1    | 2    |
| 261132  | 8    | 6   | 8   | 8   | 0    | 11   | 12   |
| 808794  | 13   | 1   | 17  | 94  | 0    | 2    | 0    |
| 407393  | 4    | 11  | 3   | 3   | 2    | 0    | 5    |
| 267406  | 7    | 0   | 0   | 0   | 0    | 0    | 0    |
| 672655  | 1    | 19  | 9   | 16  | 47   | 7    | 12   |
| 260989  | 7    | 3   | 4   | 3   | 0    | 6    | 1    |
| 2877100 | 10   | 11  | 36  | 49  | 1    | 38   | 21   |
| 305787  | 2    | 1   | 4   | 8   | 2    | 1    | 0    |
| 302641  | 0    | 1   | 3   | 7   | 1    | 3    | 9    |
| 1992    | 5    | 8   | 2   | 1   | 2    | 0    | 0    |
| 353073  | 1    | 0   | 0   | 3   | 7    | 3    | 17   |
| 134762  | 1845 | 25  | 352 | 464 | 888  | 1107 | 1495 |
| 175646  | 167  | 248 | 30  | 52  | 9    | 40   | 18   |
| 263518  | 61   | 116 | 13  | 22  | 30   | 9    | 2    |
| 2137001 | 11   | 12  | 7   | 3   | 32   | 0    | 0    |
| 3231096 | 3    | 3   | 18  | 37  | 15   | 8    | 16   |

Table S3 D

| ID      | W   | W.1 | W.2 | W.3 | W.4 | W.5 | W.6 |
|---------|-----|-----|-----|-----|-----|-----|-----|
| 176444  | 285 | 985 | 459 | 461 | 725 | 412 | 503 |
| 261114  | 0   | 0   | 0   | 0   | 0   | 12  | 4   |
| 191216  | 0   | 0   | 9   | 11  | 0   | 6   | 1   |
| 191218  | 5   | 2   | 0   | 0   | 5   | 0   | 0   |
| 167509  | 134 | 1   | 0   | 0   | 0   | 60  | 129 |
| 175416  | 0   | 0   | 0   | 0   | 0   | 0   | 0   |
| 183829  | 4   | 16  | 47  | 219 | 0   | 1   | 0   |
| 4462541 | 0   | 0   | 0   | 0   | 0   | 0   | 0   |
| 2154095 | 21  | 0   | 1   | 12  | 145 | 8   | 2   |
| 4416434 | 40  | 6   | 27  | 76  | 3   | 51  | 40  |
| 440840  | 5   | 0   | 6   | 14  | 3   | 1   | 0   |
| 40798   | 2   | 2   | 3   | 1   | 0   | 0   | 0   |
| 229452  | 81  | 2   | 9   | 39  | 0   | 34  | 54  |
| 229455  | 16  | 25  | 7   | 9   | 0   | 7   | 5   |
| 178480  | 88  | 0   | 35  | 48  | 0   | 52  | 64  |
| 4454025 | 0   | 8   | 0   | 0   | 207 | 0   | 0   |
| 4470092 | 1   | 0   | 0   | 0   | 0   | 0   | 1   |
| 259846  | 16  | 0   | 34  | 5   | 0   | 1   | 97  |
| 177068  | 123 | 35  | 13  | 42  | 98  | 33  | 8   |
| 97263   | 0   | 0   | 79  | 46  | 0   | 126 | 59  |
| 197099  | 8   | 0   | 1   | 7   | 0   | 2   | 5   |
| 265976  | 0   | 0   | 1   | 1   | 0   | 3   | 1   |
| 324999  | 1   | 0   | 1   | 0   | 2   | 1   | 1   |
| 262677  | 0   | 0   | 1   | 3   | 0   | 19  | 19  |
| 647320  | 35  | 1   | 6   | 40  | 1   | 12  | 6   |
| 174573  | 61  | 63  | 41  | 75  | 40  | 78  | 65  |
| 174571  | 2   | 4   | 44  | 18  | 1   | 28  | 20  |
| 1571092 | 0   | 0   | 78  | 12  | 0   | 0   | 0   |
| 177271  | 270 | 66  | 7   | 12  | 35  | 1   | 0   |
| 4207913 | 1   | 1   | 0   | 0   | 2   | 1   | 1   |
| 1112121 | 7   | 1   | 1   | 6   | 0   | 4   | 17  |
| 4334624 | 285 | 140 | 60  | 89  | 0   | 22  | 8   |
| 390896  | 9   | 27  | 8   | 8   | 30  | 13  | 17  |
| 129394  | 1   | 0   | 0   | 0   | 0   | 0   | 1   |
| 2897325 | 135 | 64  | 55  | 46  | 281 | 62  | 78  |
| 786708  | 0   | 0   | 0   | 0   | 0   | 0   | 0   |
| 180235  | 19  | 16  | 21  | 19  | 0   | 35  | 28  |
| 185036  | 11  | 15  | 9   | 11  | 8   | 2   | 3   |
| 130335  | 0   | 0   | 0   | 0   | 0   | 10  | 11  |
| 259249  | 1   | 956 | 0   | 0   | 0   | 0   | 0   |
| 98048   | 9   | 87  | 15  | 64  | 0   | 1   | 1   |
| 261892  | 7   | 0   | 97  | 36  | 0   | 162 | 60  |
| 1594231 | 0   | 1   | 0   | 0   | 0   | 5   | 7   |
| 4374042 | 317 | 2   | 0   | 0   | 0   | 43  | 352 |
| 204111  | 1   | 1   | 2   | 6   | 4   | 5   | 30  |

Table S3 D

| ID      | W   | W.1 | W.2 | W.3  | W.4 | W.5 | W.6 |
|---------|-----|-----|-----|------|-----|-----|-----|
| 274380  | 5   | 0   | 0   | 4    | 1   | 1   | 0   |
| 176957  | 4   | 1   | 0   | 4    | 0   | 1   | 1   |
| 198238  | 77  | 0   | 4   | 2    | 6   | 0   | 0   |
| 1110253 | 10  | 1   | 49  | 57   | 0   | 12  | 67  |
| 171079  | 11  | 29  | 0   | 0    | 0   | 8   | 0   |
| 174004  | 102 | 118 | 206 | 174  | 236 | 101 | 149 |
| 182712  | 11  | 0   | 13  | 9    | 0   | 12  | 6   |
| 4417539 | 84  | 380 | 78  | 173  | 1   | 0   | 0   |
| 1107303 | 17  | 3   | 1   | 3    | 9   | 5   | 5   |
| 310407  | 0   | 2   | 0   | 2    | 0   | 127 | 164 |
| 201374  | 0   | 0   | 7   | 1    | 7   | 5   | 4   |
| 261409  | 19  | 0   | 13  | 1    | 0   | 0   | 0   |
| 320972  | 0   | 0   | 0   | 0    | 0   | 0   | 1   |
| 196974  | 3   | 0   | 1   | 5    | 0   | 1   | 0   |
| 345362  | 0   | 0   | 0   | 0    | 0   | 0   | 0   |
| 134065  | 392 | 18  | 25  | 107  | 1   | 797 | 23  |
| 191616  | 14  | 2   | 10  | 1    | 0   | 0   | 0   |
| 460953  | 12  | 5   | 26  | 35   | 0   | 4   | 0   |
| 174768  | 0   | 0   | 0   | 0    | 0   | 0   | 0   |
| 312322  | 91  | 9   | 1   | 4    | 2   | 130 | 247 |
| 724472  | 0   | 0   | 0   | 0    | 0   | 0   | 2   |
| 207749  | 67  | 48  | 251 | 195  | 160 | 40  | 48  |
| 189730  | 164 | 484 | 204 | 295  | 349 | 191 | 118 |
| 187841  | 2   | 2   | 0   | 2    | 6   | 0   | 0   |
| 186073  | 38  | 60  | 33  | 54   | 0   | 56  | 27  |
| 1087825 | 2   | 0   | 95  | 219  | 0   | 124 | 17  |
| 47477   | 0   | 0   | 2   | 0    | 0   | 0   | 1   |
| 4296701 | 8   | 8   | 5   | 4    | 1   | 2   | 1   |
| 169428  | 4   | 1   | 1   | 5    | 4   | 3   | 0   |
| 306469  | 26  | 1   | 0   | 0    | 1   | 1   | 1   |
| 833390  | 5   | 0   | 0   | 4    | 0   | 0   | 0   |
| 315147  | 0   | 0   | 269 | 424  | 235 | 144 | 42  |
| 342962  | 74  | 75  | 77  | 88   | 1   | 74  | 38  |
| 929476  | 0   | 0   | 0   | 0    | 0   | 0   | 0   |
| 635059  | 2   | 0   | 0   | 1    | 0   | 0   | 0   |
| 228310  | 689 | 6   | 0   | 0    | 0   | 364 | 221 |
| 172705  | 0   | 0   | 0   | 0    | 0   | 0   | 1   |
| 185177  | 0   | 0   | 0   | 0    | 0   | 0   | 0   |
| 413996  | 754 | 524 | 668 | 1052 | 552 | 312 | 585 |
| 1106683 | 1   | 0   | 13  | 10   | 0   | 20  | 6   |
| 4314257 | 125 | 79  | 19  | 36   | 2   | 22  | 22  |
| 271013  | 0   | 0   | 0   | 0    | 0   | 0   | 0   |
| 264101  | 14  | 0   | 0   | 0    | 0   | 0   | 0   |
| 4402042 | 0   | 0   | 45  | 68   | 0   | 0   | 0   |
| 72820   | 2   | 2   | 22  | 99   | 29  | 36  | 49  |

Table S3 D

| ID      | W    | W.1  | W.2  | W.3 | W.4  | W.5  | W.6 |
|---------|------|------|------|-----|------|------|-----|
| 194944  | 14   | 1    | 0    | 4   | 0    | 0    | 0   |
| 166535  | 142  | 470  | 7    | 2   | 3    | 5    | 52  |
| 247557  | 16   | 1    | 2    | 8   | 0    | 10   | 5   |
| 1871    | 3    | 0    | 0    | 0   | 0    | 5    | 24  |
| 350666  | 26   | 1    | 16   | 34  | 54   | 22   | 9   |
| 190242  | 7    | 0    | 12   | 22  | 0    | 0    | 0   |
| 100344  | 70   | 40   | 0    | 0   | 0    | 1    | 0   |
| 186338  | 28   | 1    | 76   | 43  | 38   | 38   | 33  |
| 542096  | 218  | 15   | 46   | 199 | 1    | 2    | 2   |
| 619224  | 16   | 0    | 16   | 66  | 50   | 18   | 1   |
| 179695  | 0    | 0    | 0    | 3   | 0    | 0    | 0   |
| 263664  | 616  | 917  | 291  | 352 | 167  | 411  | 364 |
| 265992  | 25   | 0    | 10   | 5   | 0    | 0    | 0   |
| 184209  | 9    | 19   | 4    | 1   | 28   | 0    | 0   |
| 261992  | 164  | 21   | 78   | 48  | 4131 | 522  | 156 |
| 299858  | 6    | 1    | 2    | 0   | 4    | 3    | 0   |
| 259699  | 333  | 363  | 84   | 77  | 0    | 66   | 49  |
| 193723  | 4    | 4    | 10   | 17  | 50   | 22   | 13  |
| 204144  | 5    | 8    | 2    | 1   | 2    | 0    | 1   |
| 199403  | 7    | 1    | 4    | 14  | 8    | 13   | 0   |
| 1106468 | 3    | 8    | 16   | 19  | 22   | 18   | 15  |
| 176760  | 1    | 0    | 6    | 4   | 16   | 1    | 32  |
| 827592  | 2    | 0    | 1    | 3   | 0    | 2    | 0   |
| 416043  | 55   | 74   | 17   | 25  | 17   | 29   | 32  |
| 258641  | 0    | 0    | 0    | 0   | 0    | 0    | 0   |
| 36647   | 0    | 0    | 0    | 0   | 1    | 0    | 1   |
| 258423  | 0    | 0    | 0    | 0   | 0    | 2    | 0   |
| 258421  | 2    | 70   | 1    | 4   | 0    | 1194 | 375 |
| 186555  | 134  | 163  | 36   | 61  | 1    | 73   | 50  |
| 306699  | 0    | 0    | 0    | 0   | 0    | 0    | 0   |
| 335267  | 1    | 1    | 2    | 4   | 20   | 3    | 6   |
| 771177  | 366  | 124  | 2    | 10  | 0    | 86   | 125 |
| 204171  | 2    | 0    | 5    | 10  | 25   | 2    | 7   |
| 299267  | 0    | 0    | 0    | 0   | 0    | 0    | 0   |
| 264802  | 0    | 0    | 0    | 1   | 0    | 1    | 1   |
| 4296218 | 16   | 0    | 2    | 4   | 0    | 5    | 9   |
| 162005  | 93   | 35   | 17   | 31  | 0    | 27   | 58  |
| 176242  | 0    | 0    | 0    | 0   | 0    | 0    | 0   |
| 310751  | 10   | 0    | 0    | 0   | 0    | 0    | 0   |
| 813217  | 0    | 0    | 0    | 0   | 0    | 0    | 0   |
| 165430  | 10   | 0    | 18   | 127 | 0    | 101  | 34  |
| 522371  | 8    | 10   | 0    | 4   | 28   | 3    | 5   |
| 593043  | 3    | 4    | 5    | 8   | 11   | 11   | 8   |
| 304047  | 1012 | 2679 | 1455 | 934 | 2465 | 264  | 340 |
| 2084364 | 3    | 2    | 0    | 0   | 1    | 0    | 0   |

Table S3 D

| ID      | W    | W.1  | W.2  | W.3  | W.4  | W.5  | W.6  |
|---------|------|------|------|------|------|------|------|
| 313724  | 2    | 0    | 32   | 14   | 0    | 26   | 9    |
| 2937207 | 68   | 109  | 0    | 0    | 0    | 0    | 1    |
| 175213  | 25   | 3    | 1    | 12   | 2    | 15   | 13   |
| 4480555 | 771  | 922  | 196  | 450  | 2    | 302  | 287  |
| 4480557 | 107  | 160  | 0    | 197  | 0    | 113  | 17   |
| 175077  | 11   | 10   | 5    | 13   | 0    | 1    | 1    |
| 188266  | 16   | 0    | 1    | 18   | 0    | 0    | 0    |
| 259578  | 7    | 0    | 0    | 5    | 1    | 4    | 6    |
| 177512  | 60   | 26   | 47   | 49   | 67   | 46   | 19   |
| 3319464 | 53   | 128  | 0    | 0    | 0    | 0    | 0    |
| 3390534 | 3    | 3    | 1    | 2    | 6    | 1    | 2    |
| 277067  | 58   | 1    | 12   | 61   | 0    | 137  | 18   |
| 199674  | 3    | 0    | 1    | 0    | 0    | 0    | 2    |
| 3920500 | 307  | 21   | 1    | 24   | 0    | 3    | 2    |
| 265483  | 239  | 0    | 16   | 67   | 0    | 42   | 96   |
| 399606  | 40   | 27   | 16   | 16   | 3    | 7    | 2    |
| 192971  | 2    | 9    | 171  | 73   | 0    | 84   | 19   |
| 275218  | 64   | 0    | 7    | 16   | 1    | 14   | 15   |
| 228043  | 0    | 54   | 39   | 38   | 0    | 4    | 1    |
| 261486  | 1    | 0    | 0    | 2    | 0    | 2    | 2    |
| 297577  | 3    | 2    | 16   | 16   | 3    | 5    | 1    |
| 3150250 | 27   | 0    | 17   | 42   | 0    | 80   | 17   |
| 578016  | 1    | 0    | 3    | 3    | 4    | 1    | 0    |
| 637546  | 0    | 0    | 0    | 0    | 0    | 0    | 0    |
| 195691  | 6    | 0    | 4    | 5    | 11   | 3    | 2    |
| 4483570 | 8    | 15   | 9    | 13   | 83   | 4    | 13   |
| 4306262 | 4381 | 8693 | 943  | 2038 | 7193 | 2477 | 3060 |
| 184451  | 13   | 7    | 0    | 0    | 0    | 1    | 0    |
| 184456  | 6    | 8    | 10   | 29   | 10   | 16   | 4    |
| 814952  | 0    | 0    | 0    | 0    | 0    | 0    | 0    |
| 264225  | 0    | 2    | 4    | 25   | 1    | 11   | 9    |
| 198865  | 4    | 1    | 1    | 6    | 9    | 7    | 19   |
| 4405128 | 262  | 2    | 0    | 0    | 0    | 43   | 49   |
| 3265889 | 251  | 756  | 2182 | 528  | 1    | 100  | 29   |
| 1107652 | 12   | 31   | 13   | 14   | 100  | 25   | 40   |
| 195337  | 6    | 0    | 0    | 0    | 0    | 0    | 1    |
| 196672  | 12   | 1    | 22   | 40   | 38   | 35   | 120  |
| 269726  | 134  | 1    | 39   | 48   | 17   | 85   | 34   |
| 179457  | 167  | 58   | 170  | 225  | 487  | 197  | 5    |
| 637934  | 122  | 0    | 27   | 34   | 0    | 50   | 92   |
| 262917  | 1    | 0    | 0    | 0    | 0    | 0    | 0    |
| 1108599 | 4    | 10   | 0    | 0    | 0    | 0    | 0    |
| 339329  | 12   | 1    | 4    | 6    | 3    | 0    | 0    |
| 2875735 | 241  | 443  | 135  | 41   | 712  | 25   | 32   |
| 4402834 | 0    | 1    | 0    | 0    | 0    | 0    | 0    |



Table S3 D

| ID      | W   | W.1 | W.2 | W.3 | W.4 | W.5 | W.6 |
|---------|-----|-----|-----|-----|-----|-----|-----|
| 313898  | 4   | 0   | 0   | 8   | 0   | 2   | 0   |
| 176071  | 1   | 8   | 4   | 1   | 4   | 0   | 0   |
| 277497  | 0   | 0   | 0   | 0   | 0   | 0   | 1   |
| 349343  | 0   | 0   | 0   | 0   | 0   | 0   | 0   |
| 203605  | 22  | 50  | 18  | 15  | 131 | 22  | 40  |
| 4389125 | 198 | 298 | 37  | 43  | 114 | 7   | 11  |
| 170926  | 0   | 0   | 0   | 0   | 0   | 0   | 1   |
| 4448052 | 5   | 0   | 0   | 7   | 0   | 4   | 0   |
| 174698  | 10  | 1   | 3   | 10  | 0   | 0   | 2   |
| 332962  | 2   | 4   | 29  | 21  | 7   | 7   | 3   |
| 3610691 | 0   | 1   | 0   | 0   | 0   | 0   | 0   |
| 4390754 | 0   | 0   | 0   | 0   | 0   | 0   | 0   |
| 4457427 | 0   | 0   | 0   | 0   | 1   | 0   | 0   |
| 320169  | 33  | 13  | 51  | 49  | 14  | 26  | 8   |
| 265116  | 0   | 0   | 0   | 0   | 0   | 4   | 0   |
| 269125  | 140 | 34  | 185 | 639 | 679 | 334 | 15  |
| 4449518 | 387 | 631 | 248 | 235 | 4   | 922 | 219 |
| 561069  | 9   | 0   | 6   | 12  | 0   | 19  | 6   |
| 299171  | 0   | 0   | 0   | 0   | 5   | 0   | 0   |
| 40230   | 0   | 0   | 34  | 75  | 437 | 29  | 37  |
| 569818  | 30  | 1   | 5   | 13  | 5   | 1   | 0   |
| 319219  | 7   | 1   | 1   | 1   | 0   | 1   | 2   |
| 198964  | 40  | 62  | 31  | 45  | 137 | 46  | 60  |
| 618010  | 0   | 0   | 0   | 0   | 0   | 0   | 0   |
| 342075  | 1   | 0   | 0   | 1   | 1   | 0   | 0   |
| 135956  | 3   | 1   | 0   | 2   | 1   | 0   | 1   |
| 3919797 | 25  | 0   | 3   | 13  | 1   | 7   | 5   |
| 265301  | 1   | 13  | 1   | 0   | 2   | 2   | 2   |
| 578058  | 0   | 0   | 0   | 0   | 0   | 0   | 0   |
| 10196   | 0   | 0   | 0   | 0   | 0   | 0   | 0   |
| 259511  | 0   | 1   | 0   | 2   | 0   | 37  | 51  |
| 183619  | 3   | 17  | 3   | 1   | 13  | 1   | 1   |
| 261076  | 0   | 0   | 0   | 0   | 0   | 0   | 0   |
| 270391  | 532 | 916 | 50  | 101 | 683 | 64  | 127 |
| 4440624 | 51  | 0   | 1   | 51  | 0   | 45  | 10  |
| 4460604 | 0   | 0   | 0   | 1   | 0   | 0   | 0   |
| 95424   | 24  | 14  | 21  | 33  | 0   | 12  | 3   |
| 436341  | 3   | 0   | 0   | 4   | 2   | 3   | 0   |
| 295075  | 1   | 0   | 0   | 2   | 13  | 1   | 0   |
| 1678333 | 1   | 0   | 0   | 0   | 0   | 4   | 1   |
| 243185  | 0   | 0   | 0   | 0   | 0   | 0   | 0   |
| 175998  | 0   | 1   | 0   | 5   | 37  | 1   | 1   |
| 3267277 | 0   | 0   | 0   | 0   | 0   | 0   | 0   |
| 1931575 | 2   | 0   | 19  | 5   | 0   | 3   | 3   |
| 337784  | 19  | 0   | 4   | 14  | 0   | 16  | 4   |

Table S3 D

| ID      | W    | W.1  | W.2 | W.3 | W.4  | W.5 | W.6 |
|---------|------|------|-----|-----|------|-----|-----|
| 1921818 | 1    | 4    | 0   | 0   | 0    | 1   | 0   |
| 3172949 | 396  | 976  | 115 | 163 | 2498 | 436 | 710 |
| 3172943 | 1    | 0    | 3   | 6   | 11   | 5   | 15  |
| 645358  | 1    | 4    | 3   | 2   | 6    | 2   | 0   |
| 838685  | 5    | 11   | 2   | 6   | 72   | 12  | 7   |
| 828284  | 4    | 0    | 0   | 0   | 0    | 0   | 0   |
| 1111755 | 2170 | 2023 | 0   | 0   | 0    | 1   | 0   |
| 188878  | 68   | 0    | 120 | 53  | 0    | 15  | 9   |
| 4401580 | 9    | 7    | 1   | 1   | 2    | 1   | 0   |
| 317854  | 0    | 0    | 1   | 0   | 0    | 2   | 0   |
| 4256470 | 17   | 7    | 11  | 5   | 18   | 23  | 11  |
| 839558  | 2    | 0    | 1   | 2   | 4    | 3   | 5   |
| 185743  | 6    | 0    | 4   | 2   | 0    | 0   | 1   |
| 4378740 | 4076 | 5141 | 829 | 906 | 2944 | 423 | 580 |
| 266206  | 9    | 7    | 1   | 1   | 1    | 10  | 0   |
| 270513  | 6    | 0    | 3   | 1   | 0    | 0   | 0   |
| 334697  | 2    | 0    | 1   | 1   | 46   | 6   | 4   |
| 4352471 | 0    | 0    | 0   | 0   | 0    | 0   | 0   |
| 4426367 | 13   | 7    | 2   | 2   | 5    | 1   | 1   |
| 209030  | 61   | 2    | 182 | 225 | 201  | 103 | 112 |
| 190646  | 23   | 0    | 0   | 6   | 0    | 3   | 7   |
| 172389  | 3    | 10   | 0   | 0   | 0    | 42  | 28  |
| 213896  | 171  | 1    | 29  | 74  | 0    | 125 | 52  |
| 161762  | 2    | 0    | 1   | 0   | 0    | 2   | 0   |
| 174441  | 5    | 25   | 10  | 41  | 0    | 2   | 3   |
| 135625  | 5    | 3    | 4   | 21  | 239  | 39  | 10  |
| 4365109 | 0    | 0    | 0   | 3   | 6    | 0   | 2   |
| 832558  | 43   | 0    | 4   | 15  | 0    | 18  | 9   |
| 4464113 | 1081 | 28   | 56  | 26  | 0    | 45  | 8   |
| 1105376 | 442  | 260  | 244 | 358 | 3    | 308 | 226 |
| 346275  | 0    | 0    | 0   | 0   | 8    | 3   | 0   |
| 3505032 | 0    | 0    | 31  | 8   | 18   | 30  | 11  |
| 4355436 | 692  | 257  | 0   | 1   | 0    | 0   | 0   |
| 4480176 | 0    | 0    | 19  | 17  | 0    | 35  | 13  |
| 344527  | 2    | 11   | 4   | 6   | 0    | 5   | 3   |
| 4372003 | 21   | 306  | 28  | 66  | 916  | 62  | 17  |
| 172464  | 83   | 29   | 2   | 11  | 0    | 1   | 0   |
| 289709  | 0    | 0    | 0   | 0   | 0    | 0   | 0   |
| 174854  | 15   | 29   | 59  | 33  | 11   | 22  | 30  |
| 830014  | 31   | 1    | 4   | 24  | 0    | 43  | 22  |
| 189666  | 3    | 0    | 2   | 8   | 0    | 3   | 3   |
| 304416  | 0    | 1    | 0   | 0   | 0    | 1   | 3   |
| 214835  | 229  | 217  | 22  | 71  | 0    | 76  | 36  |
| 260346  | 31   | 2    | 5   | 26  | 0    | 127 | 14  |
| 195445  | 0    | 0    | 0   | 0   | 0    | 0   | 0   |

Table S3 D

| ID      | W     | W.1 | W.2  | W.3   | W.4  | W.5 | W.6  |
|---------|-------|-----|------|-------|------|-----|------|
| 263420  | 1     | 0   | 1    | 6     | 11   | 3   | 20   |
| 187959  | 3     | 0   | 2    | 1     | 2    | 2   | 5    |
| 199707  | 2     | 3   | 7    | 7     | 2    | 1   | 30   |
| 175485  | 1     | 0   | 1    | 1     | 3    | 0   | 2    |
| 193064  | 101   | 4   | 20   | 52    | 0    | 91  | 119  |
| 174285  | 54    | 2   | 54   | 21    | 0    | 29  | 12   |
| 1110752 | 184   | 17  | 162  | 235   | 702  | 82  | 178  |
| 177414  | 1     | 2   | 5    | 4     | 10   | 3   | 30   |
| 882782  | 2     | 3   | 1    | 1     | 4    | 1   | 12   |
| 180465  | 1     | 0   | 1    | 0     | 1    | 0   | 0    |
| 1113553 | 0     | 0   | 58   | 16    | 18   | 30  | 24   |
| 347490  | 98    | 7   | 27   | 151   | 4    | 4   | 5    |
| 322991  | 0     | 0   | 15   | 17    | 10   | 9   | 81   |
| 4327628 | 1     | 0   | 0    | 0     | 0    | 1   | 0    |
| 819999  | 0     | 0   | 0    | 0     | 0    | 0   | 0    |
| 4402077 | 1     | 0   | 1    | 0     | 0    | 0   | 0    |
| 63144   | 0     | 0   | 18   | 14    | 9    | 13  | 8    |
| 233691  | 1     | 0   | 0    | 1     | 0    | 0   | 0    |
| 1108453 | 5     | 1   | 1    | 10    | 0    | 0   | 1    |
| 38278   | 15    | 4   | 10   | 12    | 0    | 15  | 2    |
| 181419  | 0     | 0   | 14   | 23    | 0    | 21  | 5    |
| 183675  | 85    | 117 | 28   | 59    | 1    | 73  | 59   |
| 259901  | 0     | 0   | 0    | 0     | 0    | 0   | 0    |
| 322839  | 16    | 0   | 0    | 0     | 671  | 1   | 0    |
| 194388  | 10    | 4   | 4    | 5     | 14   | 1   | 2    |
| 307416  | 0     | 22  | 275  | 433   | 2243 | 101 | 52   |
| 190063  | 0     | 0   | 0    | 0     | 0    | 0   | 0    |
| 313274  | 2     | 0   | 1    | 4     | 0    | 2   | 0    |
| 1136443 | 3542  | 17  | 0    | 0     | 0    | 402 | 3413 |
| 421893  | 8     | 5   | 1    | 5     | 1    | 0   | 0    |
| 3325760 | 0     | 0   | 1    | 0     | 0    | 0   | 0    |
| 343130  | 65    | 0   | 27   | 217   | 0    | 0   | 0    |
| 174260  | 48    | 0   | 165  | 204   | 1    | 62  | 24   |
| 4453627 | 2     | 2   | 0    | 1     | 0    | 1   | 0    |
| 348785  | 0     | 0   | 0    | 0     | 0    | 0   | 1    |
| 189789  | 5     | 0   | 0    | 0     | 4    | 7   | 2    |
| 3056461 | 5     | 7   | 28   | 28    | 325  | 26  | 22   |
| 188785  | 26    | 1   | 0    | 0     | 0    | 0   | 0    |
| 354736  | 522   | 3   | 109  | 563   | 1    | 117 | 196  |
| 263953  | 5     | 0   | 0    | 0     | 0    | 0   | 0    |
| 635304  | 1     | 0   | 0    | 0     | 0    | 0   | 0    |
| 309663  | 20666 | 926 | 3639 | 23313 | 17   | 10  | 0    |
| 198604  | 6     | 13  | 2    | 2     | 7    | 5   | 2    |
| 205160  | 4     | 5   | 8    | 10    | 7    | 10  | 27   |
| 264657  | 146   | 277 | 80   | 92    | 279  | 50  | 240  |

Table S3 D

| ID      | W   | W.1 | W.2 | W.3 | W.4  | W.5 | W.6 |
|---------|-----|-----|-----|-----|------|-----|-----|
| 273928  | 9   | 10  | 0   | 2   | 0    | 6   | 0   |
| 197025  | 0   | 3   | 44  | 27  | 0    | 22  | 6   |
| 157999  | 1   | 0   | 6   | 0   | 0    | 0   | 8   |
| 385545  | 31  | 18  | 11  | 14  | 2    | 2   | 0   |
| 186777  | 196 | 119 | 129 | 332 | 0    | 110 | 13  |
| 30067   | 1   | 0   | 0   | 1   | 2    | 3   | 2   |
| 177205  | 1   | 1   | 3   | 0   | 5    | 0   | 2   |
| 4401375 | 45  | 34  | 0   | 2   | 134  | 3   | 2   |
| 176139  | 0   | 0   | 3   | 1   | 0    | 6   | 8   |
| 3998912 | 0   | 0   | 0   | 0   | 0    | 0   | 0   |
| 175114  | 0   | 0   | 0   | 1   | 0    | 0   | 0   |
| 176868  | 470 | 427 | 62  | 105 | 0    | 107 | 63  |
| 191878  | 3   | 5   | 0   | 0   | 1    | 110 | 31  |
| 259195  | 0   | 0   | 0   | 2   | 0    | 0   | 0   |
| 174791  | 51  | 214 | 221 | 310 | 223  | 111 | 273 |
| 2624257 | 9   | 4   | 9   | 6   | 58   | 2   | 1   |
| 271734  | 0   | 0   | 14  | 37  | 0    | 67  | 16  |
| 174420  | 0   | 0   | 2   | 3   | 0    | 0   | 0   |
| 1517779 | 75  | 74  | 68  | 27  | 693  | 68  | 32  |
| 1108378 | 29  | 16  | 9   | 22  | 0    | 1   | 0   |
| 319816  | 3   | 0   | 13  | 24  | 23   | 5   | 9   |
| 606063  | 0   | 0   | 0   | 0   | 0    | 0   | 0   |
| 4420272 | 1   | 0   | 2   | 0   | 0    | 0   | 3   |
| 266091  | 1   | 6   | 2   | 1   | 0    | 1   | 0   |
| 177014  | 774 | 605 | 351 | 498 | 1203 | 602 | 744 |
| 2978254 | 100 | 31  | 11  | 19  | 0    | 24  | 3   |
| 51677   | 535 | 0   | 14  | 115 | 255  | 261 | 184 |
| 345211  | 6   | 1   | 3   | 10  | 17   | 4   | 5   |
| 4476330 | 33  | 7   | 262 | 199 | 0    | 53  | 10  |
| 113417  | 6   | 13  | 0   | 1   | 3    | 0   | 0   |
| 174651  | 142 | 108 | 62  | 110 | 0    | 28  | 10  |
| 263366  | 8   | 18  | 0   | 0   | 0    | 5   | 7   |
| 178068  | 12  | 9   | 37  | 66  | 61   | 42  | 22  |
| 273904  | 26  | 1   | 11  | 0   | 0    | 0   | 0   |
| 258559  | 25  | 3   | 8   | 3   | 0    | 0   | 0   |
| 2315700 | 28  | 35  | 34  | 39  | 0    | 21  | 38  |
| 4418586 | 3   | 384 | 0   | 1   | 1    | 90  | 20  |
| 276629  | 4   | 0   | 2   | 3   | 3    | 2   | 23  |
| 4424327 | 7   | 69  | 542 | 291 | 3    | 443 | 286 |
| 831301  | 0   | 3   | 4   | 5   | 0    | 21  | 0   |
| 190026  | 209 | 2   | 101 | 152 | 2    | 157 | 28  |
| 4476780 | 0   | 10  | 3   | 1   | 3    | 0   | 1   |
| 570367  | 40  | 1   | 7   | 31  | 10   | 3   | 1   |
| 210950  | 195 | 346 | 10  | 15  | 8    | 2   | 10  |
| 4366524 | 0   | 0   | 0   | 1   | 0    | 0   | 0   |

Table S3 D

| ID      | W   | W.1 | W.2 | W.3 | W.4 | W.5 | W.6 |
|---------|-----|-----|-----|-----|-----|-----|-----|
| 272192  | 105 | 87  | 8   | 22  | 0   | 7   | 11  |
| 136604  | 58  | 1   | 0   | 0   | 1   | 1   | 0   |
| 192316  | 130 | 99  | 81  | 118 | 293 | 98  | 140 |
| 2072645 | 0   | 1   | 0   | 0   | 0   | 0   | 0   |
| 181719  | 259 | 428 | 197 | 198 | 1   | 106 | 84  |
| 292892  | 3   | 1   | 0   | 0   | 0   | 0   | 0   |
| 340600  | 77  | 0   | 0   | 0   | 0   | 3   | 1   |
| 261590  | 3   | 0   | 0   | 0   | 0   | 0   | 5   |
| 168984  | 2   | 17  | 102 | 226 | 1   | 0   | 0   |
| 1703712 | 22  | 22  | 20  | 20  | 5   | 16  | 7   |
| 264345  | 8   | 0   | 32  | 8   | 0   | 9   | 5   |
| 209845  | 0   | 0   | 0   | 0   | 0   | 0   | 0   |
| 198209  | 0   | 1   | 0   | 0   | 0   | 0   | 1   |
| 171532  | 61  | 4   | 0   | 0   | 0   | 0   | 0   |
| 299600  | 0   | 0   | 0   | 1   | 0   | 0   | 0   |
| 273967  | 108 | 124 | 16  | 25  | 0   | 12  | 3   |
| 4449984 | 4   | 0   | 22  | 40  | 0   | 9   | 8   |
| 325850  | 20  | 8   | 0   | 17  | 31  | 1   | 0   |
| 801260  | 177 | 103 | 1   | 9   | 28  | 22  | 6   |
| 259631  | 1   | 3   | 138 | 29  | 2   | 0   | 2   |
| 278609  | 28  | 32  | 22  | 31  | 14  | 25  | 22  |
| 264155  | 22  | 0   | 0   | 5   | 0   | 14  | 14  |
| 333576  | 4   | 0   | 5   | 25  | 0   | 0   | 0   |
| 194665  | 28  | 1   | 0   | 0   | 0   | 0   | 0   |
| 194662  | 1   | 0   | 0   | 0   | 0   | 0   | 1   |
| 2897332 | 35  | 17  | 33  | 60  | 135 | 68  | 18  |
| 178490  | 86  | 6   | 57  | 22  | 175 | 25  | 8   |
| 262801  | 0   | 0   | 1   | 3   | 0   | 558 | 171 |
| 4471130 | 4   | 0   | 1   | 3   | 1   | 2   | 23  |
| 4471135 | 1   | 0   | 0   | 2   | 0   | 0   | 0   |
| 259275  | 3   | 1   | 1   | 4   | 0   | 2   | 5   |
| 198194  | 59  | 188 | 14  | 22  | 0   | 63  | 26  |
| 575261  | 17  | 1   | 5   | 14  | 2   | 0   | 0   |
| 258849  | 58  | 3   | 145 | 250 | 208 | 79  | 97  |
| 4045882 | 0   | 8   | 0   | 1   | 317 | 2   | 1   |
| 177917  | 3   | 8   | 3   | 5   | 60  | 4   | 15  |
| 298973  | 5   | 0   | 1   | 0   | 2   | 0   | 0   |
| 835456  | 0   | 0   | 0   | 0   | 0   | 0   | 0   |
| 276663  | 0   | 0   | 1   | 3   | 6   | 0   | 0   |
| 3868285 | 10  | 343 | 4   | 0   | 0   | 215 | 128 |
| 276484  | 0   | 0   | 0   | 0   | 1   | 0   | 0   |
| 192598  | 0   | 0   | 18  | 31  | 1   | 59  | 22  |
| 4343528 | 35  | 71  | 18  | 32  | 1   | 13  | 12  |
| 260233  | 3   | 1   | 2   | 5   | 0   | 0   | 0   |
| 174770  | 5   | 0   | 0   | 2   | 0   | 0   | 1   |

Table S3 D

| ID      | W    | W.1  | W.2  | W.3  | W.4  | W.5 | W.6  |
|---------|------|------|------|------|------|-----|------|
| 272953  | 29   | 1    | 7    | 10   | 0    | 16  | 11   |
| 176886  | 10   | 23   | 16   | 13   | 14   | 14  | 18   |
| 4466618 | 0    | 0    | 0    | 0    | 0    | 0   | 0    |
| 259870  | 14   | 1    | 0    | 0    | 352  | 14  | 7    |
| 4450025 | 0    | 1    | 0    | 0    | 0    | 2   | 5    |
| 661055  | 4    | 234  | 1    | 1    | 25   | 6   | 2    |
| 210292  | 532  | 357  | 141  | 175  | 0    | 186 | 309  |
| 166099  | 0    | 0    | 0    | 0    | 0    | 0   | 2    |
| 345582  | 0    | 0    | 0    | 5    | 0    | 0   | 2    |
| 261334  | 0    | 0    | 0    | 1    | 0    | 0   | 0    |
| 136783  | 1    | 0    | 5    | 0    | 0    | 1   | 1    |
| 314424  | 0    | 0    | 0    | 0    | 0    | 1   | 2    |
| 771140  | 1    | 2    | 0    | 0    | 0    | 1   | 2    |
| 177930  | 5    | 0    | 4    | 12   | 4    | 2   | 0    |
| 274095  | 2    | 1    | 1    | 2    | 0    | 6   | 15   |
| 185519  | 2    | 0    | 12   | 22   | 0    | 18  | 8    |
| 162639  | 185  | 264  | 82   | 81   | 74   | 66  | 56   |
| 578649  | 10   | 6    | 5    | 17   | 8    | 1   | 0    |
| 312311  | 24   | 9    | 8    | 12   | 79   | 57  | 18   |
| 569522  | 288  | 20   | 43   | 127  | 34   | 6   | 8    |
| 2212505 | 1841 | 8368 | 1064 | 1578 | 1203 | 756 | 1601 |
| 214120  | 4    | 0    | 2    | 3    | 3    | 0   | 9    |
| 258411  | 14   | 1    | 2    | 13   | 1    | 9   | 11   |
| 4371295 | 46   | 11   | 17   | 30   | 119  | 25  | 2    |
| 2797565 | 3    | 0    | 0    | 0    | 0    | 7   | 1    |
| 1991255 | 27   | 4    | 2    | 4    | 0    | 4   | 3    |
| 261350  | 847  | 85   | 2189 | 2145 | 977  | 908 | 1121 |
| 14035   | 7    | 1    | 0    | 0    | 0    | 0   | 0    |
| 264325  | 109  | 98   | 27   | 37   | 44   | 51  | 24   |
| 437137  | 214  | 436  | 19   | 35   | 370  | 114 | 131  |
| 4481359 | 0    | 0    | 0    | 0    | 0    | 17  | 8    |
| 112720  | 14   | 3    | 6    | 12   | 14   | 19  | 11   |
| 311788  | 59   | 45   | 79   | 121  | 72   | 32  | 65   |
| 833381  | 0    | 0    | 1    | 0    | 0    | 0   | 1    |
| 177952  | 239  | 37   | 19   | 51   | 67   | 65  | 31   |
| 4483264 | 0    | 2    | 5    | 10   | 0    | 12  | 7    |
| 310781  | 187  | 1    | 0    | 0    | 0    | 10  | 3    |
| 4477372 | 0    | 1    | 0    | 0    | 0    | 0   | 1    |
| 342685  | 131  | 1    | 0    | 0    | 0    | 22  | 21   |
| 4413888 | 0    | 0    | 1    | 0    | 0    | 0   | 3570 |
| 273091  | 0    | 0    | 41   | 36   | 0    | 0   | 0    |
| 324013  | 3    | 0    | 1    | 1    | 5    | 2   | 15   |
| 177371  | 183  | 75   | 180  | 255  | 294  | 198 | 156  |
| 4393892 | 10   | 0    | 3    | 1    | 0    | 44  | 4    |
| 4378477 | 0    | 0    | 33   | 13   | 14   | 14  | 13   |

Table S3 D

| ID      | W    | W.1  | W.2  | W.3  | W.4  | W.5  | W.6  |
|---------|------|------|------|------|------|------|------|
| 4327763 | 0    | 0    | 5    | 2    | 8    | 0    | 6    |
| 1902400 | 53   | 33   | 83   | 150  | 181  | 98   | 46   |
| 181091  | 0    | 0    | 0    | 1    | 0    | 0    | 0    |
| 4384058 | 0    | 0    | 0    | 0    | 0    | 0    | 0    |
| 1112373 | 1    | 2    | 1    | 1    | 0    | 0    | 0    |
| 180879  | 81   | 28   | 33   | 128  | 1    | 62   | 62   |
| 356226  | 1    | 1    | 1    | 0    | 1    | 0    | 11   |
| 197706  | 2    | 81   | 5    | 13   | 0    | 28   | 16   |
| 264468  | 188  | 17   | 92   | 130  | 0    | 0    | 144  |
| 186549  | 4    | 0    | 1    | 2    | 0    | 4    | 2    |
| 185550  | 570  | 988  | 375  | 623  | 3    | 546  | 663  |
| 177748  | 1    | 0    | 1    | 3    | 0    | 0    | 0    |
| 189309  | 0    | 4    | 42   | 79   | 1    | 38   | 20   |
| 688800  | 0    | 0    | 0    | 0    | 0    | 2    | 1    |
| 3013444 | 159  | 167  | 1    | 10   | 14   | 19   | 16   |
| 174056  | 44   | 72   | 39   | 67   | 48   | 81   | 36   |
| 583266  | 0    | 1    | 1    | 0    | 1    | 3    | 0    |
| 180077  | 5632 | 3042 | 5610 | 7410 | 6919 | 7055 | 3675 |
| 813805  | 0    | 0    | 0    | 0    | 0    | 0    | 0    |
| 381666  | 108  | 157  | 14   | 34   | 84   | 30   | 27   |
| 4449524 | 3    | 3    | 0    | 0    | 0    | 0    | 0    |
| 4441792 | 21   | 84   | 11   | 4    | 12   | 10   | 36   |
| 259006  | 0    | 0    | 878  | 1242 | 5    | 0    | 1    |
| 190114  | 24   | 40   | 157  | 484  | 1    | 0    | 0    |
| 175227  | 0    | 0    | 9    | 4    | 0    | 11   | 11   |
| 4464787 | 3    | 701  | 0    | 0    | 0    | 0    | 0    |
| 4433554 | 6    | 0    | 0    | 0    | 0    | 0    | 0    |
| 228798  | 164  | 153  | 0    | 0    | 0    | 27   | 48   |
| 1109929 | 504  | 414  | 28   | 114  | 1    | 160  | 66   |
| 191098  | 20   | 1    | 14   | 26   | 0    | 114  | 75   |
| 196664  | 0    | 0    | 3    | 2    | 1    | 0    | 1    |
| 279026  | 3    | 3    | 18   | 30   | 86   | 22   | 2    |
| 179958  | 12   | 17   | 8    | 15   | 15   | 9    | 5    |
| 206324  | 1    | 1    | 1    | 1    | 1    | 3    | 32   |
| 174071  | 0    | 0    | 5    | 8    | 0    | 0    | 0    |
| 288128  | 7    | 3    | 2    | 2    | 0    | 2    | 5    |
| 4453609 | 23   | 60   | 5    | 7    | 48   | 25   | 4    |
| 356164  | 0    | 2    | 4    | 0    | 13   | 1    | 3    |
| 577170  | 0    | 1    | 0    | 0    | 3    | 0    | 0    |
| 185125  | 710  | 8    | 125  | 298  | 0    | 1075 | 796  |
| 185126  | 4    | 0    | 0    | 0    | 0    | 0    | 0    |
| 130663  | 8    | 8    | 0    | 2    | 4    | 1    | 0    |
| 277200  | 431  | 396  | 163  | 238  | 1    | 204  | 52   |
| 4364243 | 1    | 1    | 0    | 0    | 0    | 77   | 20   |
| 182470  | 12   | 9    | 6    | 10   | 0    | 9    | 3    |

Table S3 D

| ID      | W    | W.1  | W.2  | W.3  | W.4  | W.5  | W.6  |
|---------|------|------|------|------|------|------|------|
| 166718  | 375  | 1    | 0    | 0    | 0    | 189  | 94   |
| 176008  | 0    | 0    | 0    | 1    | 0    | 0    | 0    |
| 1106101 | 777  | 1379 | 172  | 343  | 174  | 145  | 130  |
| 584137  | 1071 | 15   | 251  | 687  | 5    | 380  | 56   |
| 268384  | 0    | 0    | 2    | 1    | 0    | 2    | 1    |
| 332608  | 10   | 37   | 14   | 27   | 1    | 0    | 1    |
| 303251  | 4    | 4    | 0    | 0    | 0    | 0    | 0    |
| 214919  | 33   | 82   | 3    | 1    | 1    | 0    | 75   |
| 267388  | 267  | 6    | 0    | 1    | 0    | 11   | 13   |
| 187181  | 29   | 114  | 90   | 156  | 0    | 0    | 0    |
| 228556  | 0    | 0    | 0    | 0    | 0    | 0    | 0    |
| 129990  | 5    | 0    | 1342 | 1516 | 1213 | 1513 | 2271 |
| 271572  | 0    | 0    | 1    | 0    | 0    | 0    | 1    |
| 3197419 | 13   | 0    | 7    | 17   | 68   | 8    | 2    |
| 187233  | 3    | 122  | 5    | 12   | 91   | 65   | 35   |
| 420168  | 0    | 0    | 0    | 0    | 0    | 0    | 0    |
| 189346  | 5    | 0    | 0    | 1    | 0    | 0    | 1    |
| 4472195 | 21   | 9    | 17   | 8    | 30   | 10   | 9    |
| 199137  | 8    | 6    | 37   | 13   | 0    | 16   | 12   |
| 264294  | 0    | 60   | 0    | 0    | 0    | 5    | 7    |
| 268844  | 0    | 0    | 2    | 2    | 1    | 1    | 2    |
| 179427  | 14   | 1    | 13   | 30   | 26   | 12   | 55   |
| 179426  | 16   | 11   | 2    | 1    | 0    | 5    | 5    |
| 331411  | 65   | 1    | 38   | 190  | 1    | 0    | 0    |
| 230268  | 2    | 0    | 0    | 0    | 0    | 4    | 0    |
| 271439  | 0    | 1    | 0    | 0    | 1    | 0    | 0    |
| 310760  | 5    | 0    | 2    | 2    | 10   | 7    | 2    |
| 170335  | 350  | 3    | 0    | 0    | 0    | 66   | 13   |
| 189476  | 46   | 1    | 7    | 29   | 16   | 35   | 27   |



Table S3 E. SPs (P) in *HBUS* mice

| ID      | P    | P.1 | P.2  | P.3 | P.4  | P.5 | P.6  | P.7 | P.8 | P.9 | P.10 | P.11 | P.12 | P.13 | P.14 | P.15 | P.16 | P.17 | P.18 | P.19 |
|---------|------|-----|------|-----|------|-----|------|-----|-----|-----|------|------|------|------|------|------|------|------|------|------|
| 181348  | 0    | 8   | 30   | 9   | 4    | 1   | 0    | 0   | 0   | 0   | 16   | 23   | 9    | 9    | 8    | 4    | 26   | 0    | 0    | 108  |
| 3957916 | 0    | 65  | 276  | 425 | 72   | 70  | 129  | 0   | 0   | 0   | 16   | 24   | 55   | 40   | 6    | 0    | 0    | 0    | 0    | 20   |
| 244484  | 0    | 13  | 55   | 57  | 26   | 10  | 2    | 0   | 0   | 0   | 7    | 12   | 11   | 12   | 9    | 10   | 10   | 0    | 0    | 5    |
| 1111328 | 0    | 6   | 15   | 10  | 0    | 0   | 0    | 0   | 0   | 0   | 8    | 2    | 0    | 0    | 2    | 0    | 1    | 0    | 0    | 0    |
| 197452  | 0    | 3   | 5    | 0   | 0    | 0   | 0    | 0   | 52  | 9   | 1    | 0    | 0    | 1    | 4    | 499  | 98   | 0    | 2    | 1    |
| 269815  | 0    | 2   | 5    | 4   | 6    | 3   | 0    | 4   | 0   | 0   | 0    | 2    | 1    | 2    | 0    | 1    | 2    | 0    | 0    | 0    |
| 363383  | 55   | 1   | 6    | 8   | 1    | 0   | 4    | 13  | 0   | 0   | 0    | 0    | 6    | 0    | 0    | 0    | 0    | 0    | 0    | 0    |
| 175080  | 0    | 19  | 14   | 21  | 0    | 15  | 0    | 0   | 0   | 0   | 25   | 2    | 0    | 0    | 0    | 6    | 1    | 7    | 9    | 3    |
| 179853  | 2    | 33  | 33   | 48  | 1    | 0   | 0    | 0   | 12  | 1   | 0    | 0    | 2    | 2    | 6    | 6    | 4    | 0    | 0    | 0    |
| 183089  | 6    | 22  | 133  | 55  | 15   | 2   | 16   | 15  | 2   | 14  | 16   | 7    | 9    | 1    | 34   | 0    | 0    | 34   | 33   | 4    |
| 263171  | 0    | 19  | 9    | 4   | 0    | 0   | 0    | 0   | 0   | 0   | 0    | 1    | 0    | 0    | 1    | 0    | 0    | 0    | 0    | 0    |
| 192222  | 0    | 1   | 0    | 0   | 0    | 0   | 0    | 0   | 0   | 0   | 1    | 0    | 0    | 0    | 96   | 0    | 0    | 2    | 0    | 0    |
| 276509  | 0    | 5   | 8    | 5   | 6    | 33  | 1    | 69  | 3   | 25  | 22   | 1    | 14   | 15   | 11   | 11   | 5    | 6    | 7    | 3    |
| 423455  | 3    | 18  | 24   | 23  | 35   | 68  | 5    | 13  | 1   | 3   | 101  | 34   | 86   | 36   | 21   | 95   | 16   | 4    | 0    | 43   |
| 267502  | 0    | 4   | 3    | 3   | 8    | 0   | 0    | 36  | 80  | 1   | 0    | 3    | 0    | 2    | 3    | 0    | 0    | 0    | 0    | 62   |
| 172163  | 2    | 0   | 77   | 8   | 36   | 1   | 0    | 0   | 0   | 0   | 32   | 204  | 22   | 116  | 38   | 147  | 70   | 575  | 456  | 34   |
| 828435  | 0    | 0   | 15   | 5   | 11   | 2   | 0    | 0   | 0   | 0   | 0    | 1    | 3    | 0    | 0    | 8    | 147  | 0    | 0    | 0    |
| 289306  | 2    | 15  | 44   | 52  | 17   | 1   | 0    | 4   | 7   | 0   | 1    | 3    | 1    | 2    | 1    | 0    | 2    | 0    | 0    | 1    |
| 290253  | 2    | 24  | 257  | 108 | 1480 | 9   | 88   | 12  | 16  | 31  | 2    | 15   | 5    | 5    | 8    | 2    | 4    | 2    | 1    | 3    |
| 216495  | 0    | 14  | 4    | 5   | 15   | 4   | 0    | 23  | 1   | 0   | 7    | 0    | 3    | 13   | 14   | 9    | 0    | 1    | 2    | 6    |
| 4329450 | 0    | 11  | 1    | 7   | 5    | 0   | 1    | 0   | 0   | 0   | 1    | 1    | 0    | 0    | 0    | 0    | 2    | 0    | 0    | 0    |
| 271418  | 3    | 5   | 23   | 15  | 1    | 4   | 0    | 0   | 0   | 0   | 32   | 6    | 6    | 24   | 20   | 27   | 2    | 25   | 10   | 18   |
| 206817  | 2    | 2   | 0    | 1   | 3    | 8   | 0    | 0   | 0   | 0   | 6    | 0    | 2    | 10   | 8    | 1    | 0    | 2    | 1    | 5    |
| 197891  | 0    | 2   | 1    | 10  | 14   | 7   | 1    | 5   | 4   | 3   | 2    | 0    | 5    | 1    | 4    | 3    | 0    | 3    | 2    | 1    |
| 205134  | 199  | 242 | 246  | 375 | 230  | 49  | 29   | 1   | 1   | 2   | 79   | 21   | 24   | 47   | 91   | 43   | 13   | 49   | 40   | 32   |
| 4352747 | 7    | 9   | 7    | 20  | 10   | 44  | 5    | 0   | 0   | 0   | 13   | 6    | 21   | 15   | 83   | 75   | 9    | 23   | 53   | 2    |
| 182043  | 0    | 68  | 58   | 13  | 0    | 0   | 0    | 291 | 32  | 304 | 28   | 136  | 6    | 28   | 479  | 9    | 1    | 0    | 0    | 431  |
| 274297  | 5    | 126 | 442  | 401 | 110  | 41  | 9    | 43  | 106 | 9   | 34   | 107  | 33   | 36   | 78   | 99   | 104  | 0    | 0    | 62   |
| 197782  | 0    | 8   | 16   | 25  | 10   | 1   | 0    | 4   | 5   | 0   | 2    | 5    | 1    | 3    | 3    | 1    | 4    | 0    | 0    | 3    |
| 1105328 | 0    | 1   | 1    | 18  | 0    | 0   | 0    | 0   | 0   | 0   | 3    | 0    | 1    | 4    | 1    | 27   | 28   | 0    | 0    | 30   |
| 274438  | 3    | 30  | 79   | 94  | 27   | 1   | 0    | 3   | 14  | 0   | 1    | 7    | 4    | 4    | 5    | 5    | 5    | 0    | 0    | 5    |
| 191948  | 0    | 174 | 1924 | 978 | 14   | 1   | 3    | 160 | 780 | 597 | 1267 | 3207 | 1083 | 979  | 1355 | 1268 | 112  | 1    | 0    | 1885 |
| 429917  | 0    | 0   | 2    | 2   | 1    | 0   | 1    | 0   | 0   | 2   | 448  | 92   | 8    | 336  | 687  | 79   | 64   | 4    | 4    | 174  |
| 22659   | 3452 | 122 | 596  | 519 | 58   | 0   | 0    | 0   | 0   | 0   | 0    | 0    | 0    | 0    | 0    | 90   | 230  | 77   | 154  | 161  |
| 187272  | 7    | 14  | 8    | 121 | 58   | 1   | 7    | 2   | 4   | 16  | 0    | 0    | 0    | 1    | 1    | 11   | 0    | 0    | 0    | 1    |
| 277388  | 1    | 20  | 180  | 80  | 783  | 20  | 114  | 22  | 20  | 27  | 8    | 27   | 9    | 1    | 6    | 1    | 4    | 0    | 0    | 4    |
| 318079  | 21   | 92  | 327  | 196 | 30   | 1   | 7    | 10  | 1   | 9   | 2    | 4    | 3    | 0    | 6    | 0    | 0    | 7    | 14   | 1    |
| 148056  | 1    | 1   | 0    | 0   | 0    | 0   | 0    | 0   | 0   | 0   | 0    | 0    | 17   | 0    | 0    | 0    | 0    | 0    | 0    | 0    |
| 270385  | 0    | 0   | 0    | 2   | 1    | 3   | 0    | 3   | 7   | 0   | 3    | 10   | 1    | 3    | 7    | 18   | 20   | 0    | 0    | 18   |
| 270382  | 9    | 22  | 16   | 10  | 33   | 1   | 1    | 0   | 0   | 1   | 2    | 1    | 0    | 0    | 0    | 8    | 1    | 2    | 9    | 3    |
| 301233  | 0    | 2   | 1    | 4   | 10   | 0   | 0    | 0   | 2   | 0   | 1    | 3    | 0    | 0    | 2    | 3    | 6    | 0    | 1    | 0    |
| 10518   | 10   | 18  | 36   | 26  | 40   | 6   | 31   | 1   | 15  | 17  | 0    | 0    | 0    | 0    | 1    | 1    | 4    | 6    | 0    | 0    |
| 827195  | 6    | 399 | 422  | 335 | 721  | 112 | 9    | 119 | 165 | 3   | 55   | 47   | 26   | 60   | 22   | 197  | 0    | 186  | 49   | 22   |
| 10512   | 0    | 2   | 1    | 20  | 60   | 361 | 1522 | 30  | 597 | 840 | 4    | 25   | 49   | 19   | 83   | 124  | 86   | 119  | 890  | 74   |
| 338640  | 0    | 10  | 17   | 44  | 50   | 14  | 2    | 2   | 3   | 2   | 0    | 7    | 12   | 16   | 8    | 3    | 9    | 4    | 3    | 2    |
| 752584  | 3    | 17  | 3    | 26  | 1    | 0   | 0    | 0   | 0   | 0   | 0    | 0    | 0    | 0    | 0    | 0    | 0    | 0    | 0    | 0    |
| 198998  | 0    | 2   | 17   | 10  | 181  | 0   | 3    | 0   | 0   | 0   | 1    | 1    | 0    | 2    | 3    | 1    | 1    | 0    | 0    | 2    |
| 4357147 | 107  | 132 | 370  | 344 | 550  | 43  | 35   | 7   | 18  | 54  | 7    | 3    | 11   | 33   | 62   | 171  | 102  | 1    | 0    | 3    |
| 196122  | 0    | 91  | 978  | 394 | 3    | 1   | 0    | 23  | 110 | 61  | 82   | 304  | 76   | 89   | 144  | 122  | 13   | 0    | 0    | 197  |
| 839200  | 0    | 0   | 0    | 1   | 2    | 0   | 0    | 0   | 0   | 0   | 19   | 14   | 46   | 9    | 4    | 121  | 106  | 1    | 0    | 168  |

Table S3 E

| ID      | P    | P.1  | P.2 | P.3  | P.4 | P.5 | P.6  | P.7  | P.8  | P.9  | P.10 | P.11 | P.12 | P.13 | P.14 | P.15 | P.16 | P.17 | P.18 | P.19 |
|---------|------|------|-----|------|-----|-----|------|------|------|------|------|------|------|------|------|------|------|------|------|------|
| 4483037 | 7    | 219  | 385 | 520  | 373 | 5   | 9    | 27   | 290  | 35   | 16   | 85   | 12   | 34   | 42   | 83   | 197  | 0    | 1    | 98   |
| 376862  | 0    | 14   | 18  | 0    | 16  | 0   | 3    | 0    | 0    | 0    | 5    | 2    | 0    | 1    | 5    | 0    | 0    | 0    | 0    | 128  |
| 148671  | 0    | 7    | 12  | 34   | 5   | 0   | 0    | 0    | 0    | 0    | 0    | 0    | 1    | 0    | 2    | 3    | 2    | 0    | 0    | 9    |
| 194504  | 0    | 10   | 0   | 0    | 0   | 20  | 4    | 0    | 0    | 1    | 2    | 25   | 6    | 0    | 0    | 5    | 0    | 0    | 0    | 0    |
| 4442899 | 0    | 7    | 10  | 21   | 10  | 10  | 2    | 0    | 3    | 0    | 0    | 1    | 1    | 1    | 0    | 2    | 8    | 0    | 0    | 6    |
| 278712  | 1    | 12   | 11  | 7    | 25  | 1   | 0    | 8    | 1    | 0    | 1    | 2    | 2    | 3    | 2    | 8    | 1    | 3    | 0    | 1    |
| 4469233 | 1    | 5    | 17  | 7    | 2   | 0   | 0    | 0    | 0    | 0    | 0    | 0    | 2    | 1    | 0    | 8    | 4    | 0    | 0    | 8    |
| 184484  | 2    | 23   | 22  | 36   | 111 | 15  | 19   | 9    | 61   | 4    | 34   | 237  | 11   | 99   | 90   | 20   | 11   | 0    | 0    | 71   |
| 655793  | 0    | 19   | 15  | 6    | 38  | 20  | 1    | 0    | 0    | 0    | 2    | 0    | 0    | 0    | 0    | 4    | 3    | 0    | 0    | 19   |
| 405780  | 0    | 25   | 0   | 12   | 9   | 4   | 1    | 95   | 58   | 1    | 2    | 0    | 0    | 2    | 7    | 15   | 19   | 0    | 0    | 34   |
| 174824  | 0    | 77   | 36  | 81   | 0   | 0   | 0    | 0    | 0    | 0    | 1    | 44   | 0    | 0    | 3    | 0    | 0    | 0    | 0    | 306  |
| 181193  | 0    | 0    | 0   | 1    | 47  | 3   | 0    | 1    | 0    | 0    | 1    | 0    | 1    | 0    | 3    | 5    | 1    | 0    | 0    | 3    |
| 3974550 | 527  | 11   | 90  | 60   | 5   | 0   | 0    | 0    | 0    | 0    | 0    | 0    | 0    | 0    | 0    | 31   | 46   | 19   | 60   | 36   |
| 173916  | 0    | 3    | 0   | 2    | 0   | 0   | 0    | 0    | 0    | 0    | 1    | 0    | 0    | 0    | 0    | 0    | 0    | 0    | 0    | 6    |
| 197623  | 232  | 125  | 266 | 158  | 437 | 200 | 561  | 1310 | 1284 | 2255 | 241  | 43   | 59   | 132  | 278  | 111  | 333  | 319  | 567  | 56   |
| 628218  | 0    | 7    | 1   | 0    | 0   | 2   | 0    | 0    | 0    | 0    | 0    | 1    | 0    | 3    | 2    | 1    | 12   | 0    | 0    | 0    |
| 175706  | 44   | 87   | 91  | 360  | 407 | 606 | 59   | 2792 | 1184 | 73   | 249  | 55   | 100  | 16   | 91   | 6    | 5    | 0    | 0    | 16   |
| 183106  | 1    | 16   | 39  | 8    | 4   | 1   | 8    | 0    | 0    | 0    | 9    | 1    | 3    | 4    | 23   | 1    | 1    | 11   | 16   | 6    |
| 267958  | 1    | 69   | 29  | 157  | 0   | 0   | 0    | 0    | 0    | 0    | 0    | 0    | 0    | 0    | 0    | 0    | 0    | 0    | 0    | 0    |
| 189288  | 0    | 10   | 15  | 41   | 0   | 0   | 0    | 81   | 381  | 9    | 2    | 13   | 6    | 16   | 137  | 11   | 7    | 0    | 0    | 12   |
| 177621  | 2    | 16   | 1   | 10   | 12  | 1   | 636  | 6    | 78   | 6    | 0    | 1    | 3    | 19   | 5    | 4    | 7    | 0    | 0    | 0    |
| 829240  | 0    | 6    | 1   | 10   | 0   | 0   | 0    | 0    | 0    | 0    | 0    | 0    | 0    | 0    | 0    | 0    | 0    | 0    | 0    | 0    |
| 2645488 | 0    | 1    | 12  | 1    | 3   | 0   | 0    | 0    | 0    | 0    | 0    | 0    | 1    | 0    | 0    | 225  | 74   | 0    | 0    | 0    |
| 186886  | 0    | 25   | 86  | 42   | 0   | 4   | 1    | 0    | 1    | 0    | 50   | 50   | 9    | 11   | 191  | 8    | 8    | 1    | 0    | 0    |
| 210262  | 1    | 21   | 26  | 28   | 88  | 9   | 2    | 0    | 0    | 0    | 3    | 0    | 1    | 6    | 0    | 0    | 0    | 0    | 0    | 16   |
| 271822  | 0    | 217  | 351 | 151  | 0   | 0   | 0    | 56   | 240  | 6    | 65   | 337  | 26   | 15   | 6    | 84   | 21   | 0    | 0    | 259  |
| 196746  | 5    | 6    | 20  | 73   | 1   | 3   | 0    | 0    | 0    | 0    | 6    | 0    | 8    | 5    | 16   | 6    | 44   | 0    | 1    | 11   |
| 179343  | 1    | 25   | 25  | 3    | 2   | 2   | 6    | 0    | 0    | 0    | 7    | 0    | 3    | 1    | 12   | 0    | 1    | 16   | 2    | 3    |
| 4435934 | 0    | 5    | 12  | 17   | 0   | 0   | 0    | 0    | 0    | 0    | 0    | 0    | 5    | 4    | 2    | 45   | 42   | 0    | 0    | 39   |
| 746679  | 206  | 1326 | 609 | 2622 | 117 | 0   | 0    | 0    | 0    | 0    | 23   | 31   | 10   | 68   | 321  | 2    | 0    | 0    | 6    | 0    |
| 4481506 | 0    | 0    | 0   | 0    | 0   | 0   | 0    | 0    | 0    | 0    | 1    | 2    | 99   | 233  | 1876 | 1    | 95   | 0    | 0    | 0    |
| 4357315 | 2    | 5    | 84  | 29   | 16  | 6   | 11   | 2    | 2    | 36   | 2    | 2    | 13   | 0    | 3    | 16   | 5    | 0    | 0    | 2    |
| 452014  | 0    | 6    | 24  | 23   | 5   | 1   | 1    | 0    | 2    | 4    | 3    | 0    | 1    | 0    | 0    | 0    | 0    | 0    | 0    | 0    |
| 68844   | 2    | 23   | 1   | 32   | 0   | 0   | 0    | 0    | 7    | 0    | 0    | 0    | 0    | 3    | 9    | 0    | 27   | 0    | 0    | 0    |
| 272593  | 0    | 2    | 4   | 7    | 2   | 28  | 5    | 9    | 1    | 2    | 0    | 1    | 4    | 4    | 3    | 104  | 91   | 66   | 8    | 273  |
| 182995  | 327  | 3    | 66  | 257  | 219 | 70  | 6    | 0    | 0    | 0    | 47   | 3    | 7    | 10   | 52   | 74   | 47   | 1035 | 810  | 8    |
| 4383135 | 1    | 33   | 6   | 6    | 0   | 123 | 34   | 0    | 0    | 4    | 3    | 4    | 0    | 0    | 0    | 0    | 0    | 0    | 0    | 1    |
| 328143  | 0    | 2    | 1   | 2    | 0   | 6   | 1    | 23   | 2    | 12   | 8    | 0    | 11   | 12   | 3    | 5    | 3    | 1    | 4    | 3    |
| 185614  | 9    | 2    | 2   | 22   | 31  | 23  | 0    | 0    | 0    | 0    | 15   | 0    | 2    | 10   | 5    | 9    | 1    | 18   | 28   | 0    |
| 4378081 | 2393 | 40   | 0   | 10   | 61  | 28  | 3930 | 861  | 802  | 137  | 2    | 2    | 569  | 29   | 106  | 34   | 6    | 28   | 27   | 8    |
| 162539  | 0    | 44   | 0   | 194  | 6   | 134 | 12   | 0    | 0    | 0    | 192  | 620  | 93   | 535  | 260  | 0    | 0    | 0    | 0    | 202  |
| 4459184 | 1    | 0    | 0   | 10   | 0   | 40  | 4    | 254  | 59   | 7    | 5    | 1    | 2    | 0    | 0    | 0    | 0    | 0    | 0    | 0    |
| 586453  | 0    | 1    | 4   | 39   | 0   | 0   | 0    | 0    | 0    | 0    | 1    | 0    | 8    | 0    | 0    | 13   | 1    | 174  | 280  | 2    |
| 827487  | 105  | 704  | 337 | 1135 | 48  | 0   | 1    | 0    | 0    | 0    | 0    | 5    | 5    | 4    | 24   | 0    | 0    | 0    | 1    | 0    |
| 184966  | 0    | 0    | 0   | 0    | 0   | 1   | 1    | 0    | 0    | 2    | 0    | 0    | 212  | 88   | 23   | 654  | 41   | 0    | 0    | 0    |
| 209028  | 0    | 1    | 3   | 2    | 2   | 8   | 0    | 0    | 0    | 0    | 6    | 0    | 3    | 9    | 4    | 1    | 0    | 0    | 3    | 0    |
| 197600  | 0    | 5    | 115 | 44   | 16  | 29  | 15   | 71   | 246  | 5    | 0    | 0    | 549  | 56   | 22   | 14   | 13   | 0    | 0    | 30   |
| 4446120 | 0    | 64   | 46  | 7    | 3   | 9   | 0    | 0    | 0    | 0    | 3    | 30   | 66   | 113  | 91   | 68   | 41   | 0    | 0    | 0    |
| 356187  | 0    | 0    | 0   | 2    | 0   | 9   | 3    | 0    | 0    | 0    | 12   | 13   | 0    | 0    | 0    | 0    | 0    | 0    | 0    | 0    |
| 1108078 | 0    | 6    | 4   | 13   | 0   | 0   | 0    | 0    | 0    | 0    | 1    | 3    | 0    | 0    | 0    | 5    | 0    | 0    | 0    | 0    |
| 1105589 | 0    | 4    | 2   | 1    | 4   | 5   | 1    | 3    | 1    | 0    | 9    | 0    | 2    | 5    | 9    | 3    | 3    | 1    | 0    | 2    |
| 4342104 | 585  | 194  | 575 | 709  | 772 | 74  | 51   | 95   | 123  | 61   | 14   | 11   | 56   | 58   | 98   | 322  | 173  | 1    | 0    | 5    |

Table S3 E

| ID      | P   | P.1 | P.2  | P.3  | P.4 | P.5 | P.6  | P.7  | P.8  | P.9  | P.10 | P.11 | P.12 | P.13 | P.14 | P.15 | P.16 | P.17 | P.18 | P.19 |
|---------|-----|-----|------|------|-----|-----|------|------|------|------|------|------|------|------|------|------|------|------|------|------|
| 180476  | 0   | 11  | 28   | 21   | 1   | 0   | 0    | 7    | 11   | 1    | 25   | 86   | 36   | 39   | 22   | 24   | 3    | 0    | 0    | 20   |
| 4335302 | 0   | 2   | 0    | 0    | 79  | 4   | 0    | 0    | 0    | 0    | 0    | 0    | 0    | 4    | 0    | 0    | 0    | 0    | 0    | 1    |
| 158302  | 0   | 1   | 0    | 0    | 1   | 0   | 0    | 0    | 0    | 0    | 0    | 0    | 0    | 4    | 1    | 23   | 15   | 67   | 0    | 2    |
| 445144  | 2   | 3   | 1    | 4    | 2   | 15  | 5    | 6    | 3    | 7    | 5    | 2    | 1    | 3    | 3    | 58   | 18   | 7    | 2    | 5    |
| 184753  | 104 | 28  | 27   | 5    | 45  | 3   | 15   | 0    | 4    | 2    | 0    | 0    | 7    | 3    | 12   | 3    | 2    | 12   | 15   | 0    |
| 192712  | 262 | 241 | 334  | 510  | 287 | 183 | 118  | 1    | 0    | 5    | 599  | 115  | 138  | 351  | 713  | 918  | 299  | 578  | 958  | 573  |
| 4414242 | 0   | 11  | 7    | 10   | 0   | 0   | 0    | 0    | 0    | 5    | 0    | 2    | 1    | 2    | 2    | 7    | 6    | 0    | 0    | 4    |
| 255098  | 88  | 2   | 16   | 15   | 1   | 0   | 0    | 0    | 0    | 0    | 0    | 0    | 0    | 0    | 0    | 4    | 5    | 5    | 4    | 6    |
| 173892  | 0   | 26  | 13   | 28   | 15  | 3   | 0    | 0    | 0    | 0    | 6    | 25   | 2    | 2    | 10   | 9    | 11   | 0    | 0    | 3    |
| 4329776 | 0   | 0   | 6    | 9    | 3   | 0   | 0    | 0    | 1    | 1    | 2    | 4    | 0    | 2    | 4    | 12   | 4    | 7    | 1    | 7    |
| 4483585 | 0   | 11  | 64   | 16   | 0   | 1   | 0    | 0    | 0    | 0    | 0    | 0    | 13   | 2    | 0    | 22   | 1    | 1    | 0    | 0    |
| 114111  | 0   | 347 | 403  | 116  | 43  | 69  | 18   | 98   | 498  | 78   | 12   | 38   | 377  | 347  | 354  | 154  | 56   | 219  | 716  | 21   |
| 214715  | 13  | 3   | 12   | 9    | 29  | 3   | 6    | 14   | 5    | 42   | 1    | 0    | 0    | 2    | 2    | 0    | 2    | 5    | 6    | 2    |
| 262159  | 0   | 0   | 0    | 0    | 0   | 7   | 2    | 0    | 0    | 0    | 2    | 14   | 3    | 1    | 0    | 0    | 1    | 0    | 0    | 228  |
| 277364  | 131 | 207 | 315  | 482  | 630 | 148 | 14   | 2344 | 1535 | 2092 | 643  | 195  | 549  | 306  | 925  | 249  | 38   | 441  | 839  | 199  |
| 195433  | 0   | 1   | 1    | 0    | 23  | 1   | 0    | 0    | 0    | 1    | 0    | 0    | 0    | 0    | 0    | 3    | 0    | 3    | 0    | 3    |
| 4449236 | 297 | 501 | 784  | 1380 | 113 | 324 | 1764 | 164  | 92   | 198  | 310  | 63   | 126  | 141  | 340  | 1074 | 38   | 59   | 1572 | 60   |
| 269401  | 1   | 5   | 13   | 32   | 21  | 5   | 0    | 0    | 0    | 0    | 0    | 3    | 0    | 3    | 1    | 2    | 1    | 0    | 0    | 2    |
| 261177  | 33  | 533 | 1233 | 625  | 466 | 477 | 24   | 1    | 0    | 1    | 248  | 11   | 459  | 384  | 288  | 232  | 277  | 601  | 339  | 55   |
| 261178  | 0   | 0   | 0    | 0    | 5   | 1   | 0    | 0    | 0    | 0    | 0    | 0    | 0    | 0    | 0    | 14   | 0    | 0    | 0    | 0    |
| 190673  | 7   | 55  | 8    | 54   | 52  | 138 | 503  | 0    | 0    | 12   | 282  | 22   | 247  | 182  | 544  | 107  | 88   | 463  | 728  | 292  |
| 176836  | 0   | 11  | 2    | 4    | 0   | 36  | 1    | 0    | 0    | 1    | 1    | 1    | 2    | 1    | 0    | 0    | 4    | 0    | 0    | 3    |
| 188116  | 0   | 1   | 11   | 15   | 30  | 0   | 0    | 0    | 0    | 0    | 57   | 84   | 6    | 35   | 14   | 12   | 23   | 0    | 0    | 45   |
| 234121  | 0   | 1   | 0    | 0    | 2   | 0   | 0    | 1    | 0    | 0    | 35   | 0    | 1    | 0    | 0    | 0    | 0    | 0    | 0    | 0    |
| 144207  | 316 | 10  | 62   | 48   | 9   | 0   | 0    | 0    | 0    | 0    | 0    | 0    | 0    | 0    | 0    | 1    | 1    | 0    | 5    | 2    |
| 188786  | 0   | 3   | 3    | 5    | 8   | 1   | 3    | 5    | 3    | 0    | 3    | 20   | 2    | 3    | 0    | 4    | 32   | 8    | 19   | 1    |
| 196856  | 0   | 10  | 12   | 11   | 8   | 0   | 2    | 3    | 4    | 2    | 2    | 9    | 2    | 1    | 2    | 4    | 2    | 6    | 3    | 28   |
| 214116  | 0   | 27  | 10   | 1    | 11  | 67  | 7    | 0    | 0    | 0    | 117  | 738  | 0    | 9    | 43   | 0    | 0    | 22   | 12   | 3    |
| 265047  | 0   | 0   | 0    | 0    | 12  | 2   | 0    | 0    | 0    | 0    | 0    | 5    | 0    | 0    | 0    | 149  | 0    | 0    | 0    | 0    |
| 415491  | 3   | 19  | 11   | 8    | 80  | 2   | 0    | 0    | 1    | 0    | 3    | 5    | 2    | 3    | 5    | 10   | 1    | 2    | 7    | 0    |
| 4390365 | 0   | 17  | 245  | 44   | 230 | 8   | 0    | 46   | 54   | 4    | 0    | 0    | 0    | 0    | 15   | 0    | 0    | 0    | 0    | 0    |
| 174667  | 0   | 12  | 43   | 57   | 122 | 3   | 1    | 103  | 66   | 223  | 106  | 379  | 18   | 103  | 86   | 25   | 71   | 1    | 0    | 1007 |
| 2901239 | 0   | 3   | 0    | 0    | 0   | 0   | 0    | 0    | 0    | 0    | 0    | 0    | 0    | 0    | 0    | 0    | 0    | 0    | 0    | 0    |
| 273687  | 0   | 65  | 56   | 68   | 1   | 4   | 0    | 0    | 0    | 0    | 1    | 1    | 1    | 0    | 1    | 11   | 14   | 0    | 0    | 0    |
| 319165  | 1   | 23  | 28   | 48   | 18  | 0   | 8    | 3    | 2    | 0    | 3    | 9    | 0    | 2    | 3    | 0    | 1    | 9    | 7    | 14   |
| 269426  | 1   | 48  | 8    | 44   | 14  | 0   | 0    | 0    | 1    | 2    | 0    | 4    | 0    | 2    | 0    | 11   | 2    | 0    | 0    | 2    |
| 270303  | 0   | 17  | 36   | 56   | 37  | 15  | 1    | 0    | 0    | 1    | 5    | 2    | 7    | 4    | 6    | 18   | 18   | 0    | 0    | 17   |
| 329271  | 0   | 4   | 8    | 12   | 1   | 5   | 0    | 0    | 0    | 0    | 3    | 2    | 6    | 10   | 1    | 0    | 0    | 0    | 0    | 13   |
| 198024  | 0   | 1   | 9    | 2    | 30  | 0   | 0    | 0    | 1    | 0    | 0    | 0    | 0    | 0    | 0    | 0    | 0    | 0    | 0    | 1    |
| 896545  | 10  | 0   | 3    | 3    | 0   | 0   | 1    | 0    | 0    | 1    | 68   | 0    | 0    | 0    | 0    | 0    | 0    | 0    | 0    | 0    |
| 263705  | 0   | 15  | 62   | 40   | 0   | 31  | 4    | 0    | 1    | 0    | 27   | 55   | 4    | 36   | 13   | 0    | 0    | 0    | 0    | 22   |
| 174418  | 9   | 167 | 2    | 82   | 2   | 4   | 2    | 0    | 1    | 5    | 339  | 733  | 0    | 83   | 46   | 119  | 129  | 5    | 1    | 154  |
| 174417  | 0   | 2   | 4    | 27   | 0   | 0   | 1    | 0    | 0    | 0    | 14   | 0    | 0    | 0    | 0    | 0    | 0    | 0    | 0    | 0    |
| 184329  | 11  | 0   | 9    | 34   | 84  | 31  | 0    | 0    | 0    | 0    | 16   | 1    | 4    | 8    | 22   | 5    | 1    | 22   | 27   | 0    |
| 192342  | 0   | 0   | 1    | 1    | 0   | 0   | 1    | 0    | 0    | 0    | 0    | 0    | 0    | 0    | 1    | 0    | 0    | 0    | 1    | 0    |
| 4453773 | 22  | 33  | 56   | 59   | 120 | 80  | 358  | 16   | 127  | 132  | 2    | 3    | 7    | 2    | 12   | 43   | 12   | 40   | 222  | 29   |
| 372473  | 240 | 16  | 35   | 40   | 5   | 1   | 4    | 14   | 1    | 0    | 1    | 1    | 52   | 1    | 1    | 0    | 0    | 1    | 0    | 0    |
| 199698  | 235 | 52  | 121  | 60   | 4   | 12  | 3    | 0    | 0    | 0    | 19   | 6    | 3    | 15   | 49   | 4    | 7    | 10   | 13   | 20   |
| 191067  | 0   | 0   | 1    | 0    | 0   | 1   | 2    | 0    | 0    | 3    | 37   | 19   | 41   | 26   | 18   | 238  | 514  | 7547 | 1071 | 753  |
| 453896  | 447 | 56  | 106  | 75   | 95  | 5   | 14   | 51   | 39   | 112  | 42   | 8    | 12   | 33   | 18   | 22   | 9    | 10   | 29   | 7    |
| 179548  | 12  | 123 | 107  | 148  | 264 | 2   | 0    | 73   | 13   | 0    | 21   | 1    | 6    | 17   | 36   | 21   | 2    | 2    | 8    | 13   |
| 179547  | 9   | 7   | 55   | 77   | 19  | 57  | 8    | 183  | 327  | 339  | 25   | 101  | 70   | 63   | 174  | 53   | 115  | 0    | 1    | 42   |

Table S3 E

| ID      | P    | P.1 | P.2 | P.3  | P.4  | P.5  | P.6  | P.7  | P.8  | P.9  | P.10 | P.11 | P.12 | P.13 | P.14 | P.15 | P.16 | P.17 | P.18 | P.19 |
|---------|------|-----|-----|------|------|------|------|------|------|------|------|------|------|------|------|------|------|------|------|------|
| 113978  | 13   | 16  | 38  | 36   | 32   | 1    | 0    | 78   | 0    | 1    | 0    | 0    | 0    | 0    | 0    | 0    | 0    | 0    | 0    | 0    |
| 3449666 | 0    | 0   | 0   | 0    | 0    | 0    | 0    | 0    | 0    | 0    | 50   | 26   | 1    | 0    | 0    | 11   | 19   | 47   | 171  | 49   |
| 4468234 | 7    | 2   | 6   | 0    | 5    | 0    | 1    | 0    | 5    | 1    | 0    | 2    | 1    | 0    | 10   | 14   | 6    | 102  | 115  | 13   |
| 4466275 | 0    | 17  | 37  | 25   | 8    | 5    | 1    | 0    | 0    | 0    | 22   | 6    | 7    | 3    | 4    | 12   | 1    | 0    | 0    | 18   |
| 186742  | 0    | 86  | 2   | 98   | 0    | 4    | 1    | 14   | 6    | 1    | 9    | 7    | 6    | 21   | 27   | 8    | 7    | 19   | 21   | 22   |
| 308332  | 3    | 176 | 219 | 74   | 41   | 14   | 5    | 20   | 11   | 61   | 47   | 5    | 422  | 69   | 258  | 56   | 809  | 5    | 1    | 0    |
| 318819  | 0    | 13  | 3   | 6    | 2    | 0    | 0    | 0    | 1    | 0    | 0    | 0    | 0    | 0    | 5    | 5    | 12   | 0    | 0    | 2    |
| 4379449 | 0    | 16  | 140 | 27   | 145  | 25   | 7    | 182  | 227  | 18   | 0    | 0    | 2    | 2    | 63   | 0    | 0    | 0    | 0    | 0    |
| 105109  | 1    | 27  | 59  | 46   | 239  | 20   | 3    | 0    | 0    | 0    | 3    | 1    | 1    | 4    | 1    | 0    | 0    | 0    | 0    | 38   |
| 261132  | 1    | 50  | 58  | 134  | 34   | 10   | 0    | 20   | 67   | 2    | 4    | 5    | 6    | 3    | 1    | 4    | 1    | 0    | 0    | 17   |
| 808794  | 2    | 14  | 0   | 21   | 0    | 1    | 0    | 0    | 9    | 0    | 1    | 4    | 0    | 2    | 1    | 3    | 75   | 1    | 1    | 1    |
| 407393  | 133  | 16  | 36  | 29   | 40   | 2    | 3    | 16   | 14   | 48   | 8    | 0    | 5    | 5    | 3    | 5    | 0    | 6    | 3    | 1    |
| 267406  | 0    | 17  | 16  | 16   | 3    | 4    | 0    | 0    | 0    | 0    | 4    | 12   | 1    | 1    | 0    | 0    | 0    | 0    | 0    | 0    |
| 672655  | 22   | 42  | 57  | 88   | 115  | 5    | 0    | 107  | 52   | 68   | 15   | 7    | 10   | 7    | 21   | 19   | 2    | 33   | 44   | 16   |
| 260989  | 0    | 0   | 0   | 0    | 0    | 9    | 0    | 18   | 3    | 0    | 3    | 9    | 8    | 0    | 3    | 0    | 2    | 0    | 0    | 7    |
| 2877100 | 0    | 88  | 186 | 244  | 18   | 9    | 6    | 0    | 0    | 1    | 6    | 2    | 3    | 5    | 25   | 53   | 1    | 0    | 0    | 27   |
| 305787  | 1    | 6   | 2   | 4    | 40   | 3    | 0    | 0    | 0    | 0    | 0    | 1    | 0    | 0    | 2    | 4    | 6    | 4    | 21   | 2    |
| 302641  | 0    | 2   | 16  | 25   | 94   | 1    | 4    | 3    | 1    | 4    | 0    | 2    | 1    | 0    | 2    | 4    | 8    | 0    | 1    | 6    |
| 1992    | 17   | 69  | 41  | 55   | 56   | 3    | 181  | 15   | 23   | 5    | 5    | 4    | 18   | 2    | 27   | 3    | 0    | 1    | 1    | 1    |
| 353073  | 1    | 6   | 3   | 12   | 7    | 20   | 0    | 13   | 2    | 7    | 10   | 1    | 5    | 6    | 4    | 10   | 0    | 3    | 3    | 2    |
| 134762  | 403  | 342 | 439 | 1011 | 178  | 1751 | 1453 | 2408 | 1856 | 4566 | 3067 | 387  | 1230 | 1137 | 1005 | 3207 | 972  | 838  | 1872 | 1104 |
| 175646  | 0    | 95  | 24  | 54   | 0    | 5    | 1    | 2    | 0    | 0    | 27   | 13   | 121  | 38   | 151  | 109  | 110  | 14   | 15   | 40   |
| 263518  | 69   | 10  | 22  | 47   | 6    | 59   | 124  | 46   | 116  | 193  | 15   | 38   | 50   | 28   | 36   | 27   | 67   | 30   | 34   | 9    |
| 2137001 | 1341 | 213 | 309 | 57   | 343  | 54   | 185  | 20   | 77   | 40   | 1    | 25   | 34   | 6    | 98   | 12   | 6    | 43   | 91   | 6    |
| 3231096 | 30   | 3   | 14  | 7    | 13   | 2    | 3    | 8    | 4    | 17   | 8    | 1    | 11   | 9    | 14   | 30   | 8    | 12   | 43   | 11   |
| 176444  | 314  | 818 | 373 | 307  | 1548 | 170  | 387  | 0    | 2    | 5    | 271  | 75   | 649  | 314  | 1022 | 269  | 60   | 1063 | 949  | 402  |
| 261114  | 0    | 0   | 1   | 19   | 0    | 50   | 6    | 1    | 0    | 0    | 0    | 0    | 4    | 0    | 1    | 19   | 1    | 0    | 0    | 0    |
| 191216  | 7    | 7   | 9   | 78   | 115  | 4    | 20   | 4    | 5    | 20   | 0    | 0    | 0    | 0    | 1    | 15   | 4    | 0    | 0    | 10   |
| 191218  | 38   | 160 | 785 | 522  | 67   | 30   | 181  | 288  | 48   | 310  | 256  | 134  | 136  | 40   | 366  | 0    | 0    | 427  | 762  | 36   |
| 167509  | 0    | 5   | 0   | 0    | 83   | 31   | 2    | 0    | 0    | 0    | 0    | 0    | 4    | 17   | 14   | 0    | 0    | 0    | 0    | 10   |
| 175416  | 0    | 7   | 4   | 15   | 0    | 0    | 0    | 0    | 0    | 2    | 0    | 1    | 0    | 0    | 0    | 0    | 0    | 0    | 0    | 0    |
| 183829  | 0    | 1   | 3   | 15   | 11   | 59   | 216  | 99   | 96   | 289  | 2    | 3    | 5    | 3    | 28   | 102  | 23   | 0    | 0    | 3    |
| 4462541 | 5    | 912 | 1   | 169  | 1023 | 307  | 29   | 54   | 90   | 6    | 87   | 629  | 0    | 0    | 0    | 0    | 0    | 0    | 0    | 0    |
| 2154095 | 3    | 30  | 126 | 101  | 59   | 1    | 0    | 0    | 1    | 0    | 2    | 10   | 1    | 0    | 0    | 8    | 12   | 231  | 44   | 20   |
| 4416434 | 1    | 8   | 9   | 13   | 368  | 82   | 8    | 0    | 3    | 3    | 77   | 190  | 3    | 10   | 7    | 31   | 49   | 3    | 4    | 110  |
| 440840  | 0    | 5   | 2   | 4    | 6    | 2    | 1    | 1    | 9    | 0    | 2    | 1    | 0    | 0    | 1    | 0    | 9    | 3    | 2    | 1    |
| 40798   | 0    | 7   | 52  | 52   | 2    | 2    | 0    | 1    | 5    | 0    | 1    | 16   | 4    | 0    | 2    | 0    | 0    | 0    | 0    | 0    |
| 229452  | 0    | 54  | 36  | 88   | 38   | 14   | 1    | 12   | 14   | 2    | 17   | 100  | 6    | 17   | 5    | 10   | 12   | 0    | 0    | 46   |
| 229455  | 0    | 6   | 2   | 22   | 0    | 2    | 12   | 0    | 0    | 0    | 4    | 6    | 1    | 0    | 3    | 7    | 4    | 0    | 0    | 9    |
| 178480  | 0    | 170 | 0   | 2    | 0    | 19   | 2    | 0    | 0    | 1    | 18   | 22   | 38   | 12   | 9    | 0    | 55   | 0    | 0    | 195  |
| 4454025 | 0    | 0   | 1   | 0    | 13   | 4    | 646  | 33   | 53   | 158  | 1    | 0    | 31   | 1    | 12   | 1    | 1    | 608  | 554  | 3    |
| 4470092 | 1    | 1   | 1   | 0    | 9    | 4    | 0    | 2    | 21   | 0    | 4    | 21   | 12   | 6    | 4    | 12   | 0    | 3    | 0    | 0    |
| 259846  | 7    | 0   | 0   | 0    | 205  | 415  | 12   | 546  | 3535 | 48   | 319  | 1965 | 944  | 787  | 315  | 2316 | 23   | 1    | 2    | 7    |
| 177068  | 4    | 32  | 64  | 237  | 9    | 5    | 1839 | 80   | 312  | 18   | 105  | 400  | 65   | 17   | 96   | 69   | 427  | 131  | 760  | 21   |
| 97263   | 0    | 3   | 1   | 13   | 114  | 32   | 3    | 0    | 2    | 1    | 0    | 1    | 0    | 0    | 1    | 352  | 76   | 0    | 0    | 269  |
| 197099  | 0    | 9   | 28  | 33   | 9    | 3    | 0    | 6    | 5    | 0    | 1    | 12   | 3    | 8    | 4    | 9    | 7    | 0    | 0    | 5    |
| 265976  | 0    | 0   | 0   | 1    | 2    | 0    | 0    | 0    | 0    | 0    | 0    | 1    | 0    | 0    | 0    | 1    | 0    | 0    | 0    | 3    |
| 324999  | 0    | 0   | 0   | 0    | 4    | 0    | 0    | 0    | 0    | 0    | 0    | 2    | 0    | 0    | 0    | 1    | 0    | 0    | 1    | 0    |
| 262677  | 0    | 18  | 10  | 15   | 0    | 26   | 4    | 0    | 0    | 0    | 9    | 20   | 0    | 0    | 0    | 6    | 1    | 0    | 0    | 6    |
| 647320  | 0    | 31  | 39  | 86   | 63   | 8    | 0    | 67   | 8    | 1    | 8    | 56   | 3    | 12   | 3    | 24   | 27   | 0    | 0    | 13   |
| 174573  | 16   | 189 | 134 | 208  | 314  | 5    | 1    | 120  | 28   | 4    | 78   | 10   | 14   | 36   | 92   | 124  | 14   | 13   | 36   | 86   |
| 174571  | 2    | 56  | 492 | 199  | 1    | 0    | 1    | 1    | 18   | 9    | 16   | 53   | 19   | 10   | 30   | 30   | 4    | 1    | 1    | 67   |

Table S3 E

| ID      | P   | P.1  | P.2  | P.3  | P.4  | P.5 | P.6 | P.7  | P.8  | P.9  | P.10 | P.11 | P.12 | P.13 | P.14 | P.15 | P.16 | P.17 | P.18 | P.19 |
|---------|-----|------|------|------|------|-----|-----|------|------|------|------|------|------|------|------|------|------|------|------|------|
| 1571092 | 0   | 0    | 0    | 0    | 133  | 100 | 14  | 0    | 0    | 0    | 776  | 145  | 1    | 1    | 0    | 0    | 2    | 1    | 0    | 0    |
| 177271  | 6   | 467  | 1040 | 409  | 1541 | 280 | 491 | 70   | 119  | 1114 | 118  | 89   | 124  | 461  | 597  | 1057 | 619  | 5    | 1    | 0    |
| 4207913 | 1   | 56   | 23   | 9    | 84   | 3   | 5   | 7    | 10   | 3    | 1    | 2    | 3    | 0    | 2    | 0    | 0    | 0    | 1    | 0    |
| 1112121 | 0   | 19   | 2    | 1    | 0    | 7   | 0   | 0    | 0    | 0    | 0    | 0    | 1    | 3    | 2    | 8    | 11   | 0    | 0    | 0    |
| 4334624 | 14  | 58   | 17   | 44   | 49   | 3   | 20  | 26   | 162  | 10   | 28   | 80   | 124  | 83   | 237  | 36   | 15   | 0    | 0    | 81   |
| 390896  | 26  | 46   | 83   | 84   | 90   | 53  | 24  | 92   | 74   | 108  | 16   | 3    | 16   | 8    | 27   | 25   | 3    | 10   | 18   | 5    |
| 129394  | 0   | 0    | 0    | 0    | 0    | 2   | 0   | 0    | 0    | 0    | 1    | 1    | 17   | 3    | 4    | 147  | 0    | 0    | 0    | 0    |
| 2897325 | 0   | 28   | 4    | 1061 | 127  | 23  | 20  | 30   | 239  | 313  | 18   | 67   | 17   | 24   | 33   | 501  | 463  | 90   | 38   | 94   |
| 786708  | 2   | 4    | 1    | 3    | 0    | 0   | 0   | 0    | 0    | 0    | 0    | 0    | 0    | 0    | 0    | 0    | 0    | 0    | 0    | 0    |
| 180235  | 0   | 0    | 0    | 0    | 2    | 34  | 3   | 0    | 0    | 0    | 10   | 4    | 8    | 2    | 27   | 19   | 38   | 0    | 0    | 19   |
| 185036  | 8   | 86   | 36   | 131  | 122  | 55  | 221 | 0    | 1    | 5    | 25   | 1    | 28   | 20   | 87   | 5    | 2    | 35   | 41   | 16   |
| 130335  | 0   | 0    | 0    | 0    | 12   | 0   | 0   | 1    | 3    | 0    | 4    | 20   | 2    | 4    | 0    | 24   | 0    | 0    | 0    | 13   |
| 259249  | 14  | 32   | 0    | 358  | 0    | 0   | 0   | 0    | 0    | 0    | 0    | 0    | 0    | 0    | 533  | 0    | 0    | 0    | 0    | 0    |
| 98048   | 1   | 17   | 33   | 19   | 99   | 9   | 4   | 0    | 1    | 0    | 2    | 12   | 22   | 45   | 30   | 50   | 19   | 0    | 0    | 5    |
| 261892  | 0   | 0    | 23   | 0    | 1    | 21  | 4   | 0    | 0    | 0    | 19   | 29   | 46   | 40   | 16   | 173  | 0    | 0    | 0    | 150  |
| 1594231 | 0   | 0    | 0    | 0    | 82   | 0   | 0   | 11   | 38   | 4    | 7    | 44   | 1    | 2    | 2    | 46   | 0    | 0    | 0    | 8    |
| 4374042 | 44  | 2786 | 11   | 4481 | 2085 | 511 | 19  | 0    | 2    | 0    | 323  | 336  | 268  | 328  | 162  | 0    | 0    | 0    | 0    | 26   |
| 204111  | 4   | 47   | 11   | 17   | 117  | 7   | 1   | 0    | 0    | 0    | 2    | 0    | 12   | 11   | 18   | 2    | 0    | 15   | 9    | 9    |
| 274380  | 0   | 1    | 1    | 2    | 0    | 0   | 1   | 1    | 3    | 0    | 1    | 1    | 0    | 1    | 0    | 1    | 0    | 1    | 0    | 1    |
| 176957  | 0   | 12   | 2    | 7    | 5    | 0   | 0   | 4    | 2    | 0    | 1    | 1    | 4    | 2    | 0    | 4    | 1    | 1    | 0    | 2    |
| 198238  | 0   | 5    | 23   | 8    | 1    | 4   | 3   | 0    | 2    | 0    | 0    | 1    | 30   | 20   | 9    | 2    | 6    | 0    | 6    | 1    |
| 1110253 | 15  | 53   | 108  | 153  | 129  | 19  | 0   | 0    | 0    | 9    | 11   | 74   | 36   | 24   | 17   | 132  | 5    | 0    | 0    | 217  |
| 171079  | 0   | 2    | 54   | 7    | 17   | 0   | 0   | 43   | 50   | 1    | 0    | 0    | 1    | 0    | 2    | 0    | 3    | 0    | 0    | 2    |
| 174004  | 79  | 340  | 213  | 147  | 131  | 62  | 38  | 1    | 0    | 2    | 267  | 55   | 314  | 105  | 496  | 446  | 114  | 191  | 208  | 191  |
| 182712  | 0   | 0    | 1    | 8    | 0    | 5   | 0   | 0    | 0    | 0    | 17   | 15   | 7    | 20   | 7    | 1    | 1    | 0    | 0    | 16   |
| 4417539 | 0   | 1    | 0    | 0    | 0    | 0   | 196 | 0    | 0    | 0    | 0    | 0    | 0    | 362  | 207  | 0    | 0    | 0    | 0    | 0    |
| 1107303 | 0   | 71   | 6    | 62   | 0    | 0   | 0   | 0    | 0    | 0    | 1    | 1    | 1    | 4    | 4    | 0    | 2    | 5    | 3    | 10   |
| 310407  | 0   | 0    | 0    | 0    | 150  | 0   | 0   | 84   | 266  | 5    | 114  | 447  | 14   | 31   | 8    | 709  | 2    | 0    | 0    | 200  |
| 201374  | 52  | 2    | 6    | 11   | 1    | 0   | 0   | 0    | 0    | 0    | 0    | 0    | 0    | 0    | 0    | 3    | 6    | 3    | 1    | 10   |
| 261409  | 0   | 1    | 1    | 1    | 0    | 0   | 0   | 0    | 4    | 2    | 0    | 0    | 0    | 1    | 0    | 47   | 6    | 0    | 0    | 0    |
| 320972  | 0   | 10   | 1    | 34   | 54   | 12  | 1   | 0    | 0    | 0    | 0    | 0    | 0    | 0    | 1    | 0    | 0    | 0    | 0    | 0    |
| 196974  | 1   | 10   | 26   | 15   | 5    | 2   | 0   | 19   | 4    | 0    | 0    | 4    | 2    | 2    | 2    | 9    | 0    | 0    | 0    | 1    |
| 345362  | 224 | 12   | 20   | 40   | 5    | 2   | 17  | 54   | 1    | 1    | 0    | 0    | 37   | 0    | 3    | 2    | 0    | 2    | 3    | 0    |
| 134065  | 1   | 93   | 24   | 130  | 0    | 0   | 0   | 0    | 0    | 133  | 13   | 29   | 42   | 34   | 21   | 1105 | 486  | 1    | 1    | 167  |
| 191616  | 1   | 11   | 132  | 341  | 1    | 132 | 8   | 90   | 274  | 7    | 20   | 406  | 54   | 33   | 8    | 176  | 10   | 0    | 0    | 0    |
| 460953  | 53  | 8    | 63   | 28   | 1    | 264 | 42  | 0    | 0    | 1    | 218  | 11   | 62   | 159  | 87   | 96   | 3    | 0    | 0    | 26   |
| 174768  | 18  | 39   | 83   | 901  | 1    | 0   | 0   | 0    | 0    | 0    | 385  | 5    | 5    | 1    | 0    | 0    | 0    | 0    | 0    | 0    |
| 312322  | 0   | 3    | 5    | 5    | 2    | 13  | 4   | 6    | 5    | 12   | 8    | 1    | 57   | 64   | 33   | 3    | 2    | 0    | 1    | 95   |
| 724472  | 0   | 0    | 29   | 16   | 0    | 0   | 1   | 0    | 1    | 0    | 0    | 2    | 0    | 0    | 0    | 0    | 0    | 0    | 0    | 0    |
| 207749  | 0   | 29   | 2    | 71   | 0    | 0   | 0   | 0    | 0    | 0    | 3    | 0    | 30   | 16   | 46   | 28   | 2    | 25   | 1    | 2    |
| 189730  | 23  | 43   | 97   | 113  | 85   | 792 | 499 | 1057 | 1127 | 1841 | 326  | 48   | 318  | 120  | 507  | 471  | 123  | 191  | 279  | 106  |
| 187841  | 395 | 65   | 105  | 14   | 131  | 10  | 24  | 2    | 12   | 2    | 0    | 6    | 10   | 2    | 28   | 1    | 0    | 12   | 23   | 0    |
| 186073  | 0   | 126  | 244  | 389  | 23   | 42  | 9   | 0    | 0    | 0    | 21   | 16   | 11   | 15   | 18   | 40   | 92   | 0    | 0    | 30   |
| 1087825 | 1   | 0    | 0    | 0    | 0    | 2   | 0   | 29   | 4    | 45   | 265  | 258  | 14   | 70   | 27   | 202  | 67   | 0    | 0    | 121  |
| 47477   | 0   | 17   | 14   | 7    | 0    | 0   | 0   | 6    | 3    | 7    | 0    | 2    | 0    | 0    | 11   | 1    | 0    | 0    | 0    | 10   |
| 4296701 | 0   | 4    | 38   | 44   | 7    | 5   | 0   | 10   | 24   | 3    | 0    | 5    | 2    | 3    | 8    | 3    | 4    | 0    | 0    | 1    |
| 169428  | 63  | 16   | 23   | 14   | 17   | 0   | 3   | 3    | 3    | 3    | 0    | 1    | 0    | 0    | 0    | 0    | 4    | 0    | 1    | 0    |
| 306469  | 0   | 124  | 26   | 23   | 0    | 0   | 0   | 0    | 0    | 0    | 133  | 662  | 98   | 99   | 50   | 554  | 1    | 0    | 0    | 118  |
| 833390  | 0   | 21   | 653  | 90   | 3    | 0   | 0   | 0    | 1    | 0    | 207  | 1103 | 1    | 0    | 1    | 0    | 2    | 0    | 0    | 0    |
| 315147  | 0   | 0    | 0    | 0    | 0    | 0   | 0   | 0    | 0    | 0    | 0    | 0    | 0    | 0    | 0    | 21   | 3    | 161  | 78   | 11   |
| 342962  | 0   | 0    | 0    | 0    | 0    | 0   | 0   | 0    | 0    | 0    | 22   | 19   | 46   | 12   | 131  | 59   | 3    | 0    | 0    | 31   |
| 929476  | 133 | 10   | 23   | 25   | 5    | 5   | 16  | 69   | 1    | 3    | 0    | 0    | 34   | 0    | 4    | 1    | 0    | 1    | 0    | 0    |

Table S3 E

| ID      | P    | P.1 | P.2 | P.3 | P.4 | P.5 | P.6 | P.7  | P.8  | P.9  | P.10 | P.11 | P.12 | P.13 | P.14 | P.15 | P.16 | P.17 | P.18 | P.19 |
|---------|------|-----|-----|-----|-----|-----|-----|------|------|------|------|------|------|------|------|------|------|------|------|------|
| 635059  | 0    | 0   | 0   | 0   | 0   | 5   | 2   | 0    | 0    | 0    | 6    | 2    | 31   | 8    | 11   | 233  | 1    | 0    | 0    | 0    |
| 228310  | 0    | 413 | 231 | 474 | 0   | 150 | 22  | 0    | 0    | 0    | 70   | 79   | 0    | 3    | 2    | 0    | 0    | 0    | 0    | 446  |
| 172705  | 14   | 0   | 1   | 4   | 263 | 0   | 0   | 0    | 0    | 0    | 0    | 0    | 0    | 0    | 5    | 0    | 0    | 0    | 0    | 84   |
| 185177  | 0    | 28  | 13  | 8   | 7   | 2   | 0   | 0    | 1    | 0    | 0    | 0    | 10   | 5    | 5    | 0    | 26   | 0    | 0    | 0    |
| 413996  | 1877 | 148 | 523 | 325 | 315 | 304 | 659 | 1738 | 1787 | 5405 | 2742 | 557  | 940  | 982  | 1161 | 1590 | 304  | 367  | 1767 | 652  |
| 1106683 | 0    | 22  | 3   | 14  | 2   | 1   | 0   | 0    | 0    | 0    | 5    | 2    | 0    | 13   | 9    | 14   | 8    | 2    | 0    | 1    |
| 4314257 | 14   | 14  | 65  | 72  | 23  | 37  | 2   | 69   | 115  | 103  | 5    | 57   | 18   | 14   | 85   | 91   | 108  | 1    | 1    | 54   |
| 271013  | 30   | 47  | 40  | 20  | 52  | 0   | 1   | 0    | 3    | 1    | 0    | 2    | 0    | 0    | 0    | 2    | 1    | 0    | 3    | 1    |
| 264101  | 4    | 124 | 245 | 148 | 11  | 5   | 0   | 0    | 0    | 0    | 0    | 1    | 39   | 14   | 8    | 1    | 0    | 0    | 0    | 0    |
| 4402042 | 0    | 13  | 0   | 23  | 0   | 0   | 0   | 0    | 0    | 0    | 0    | 0    | 0    | 0    | 0    | 0    | 0    | 0    | 0    | 0    |
| 72820   | 2    | 0   | 0   | 0   | 0   | 12  | 9   | 15   | 6    | 113  | 1    | 0    | 7    | 8    | 31   | 4    | 15   | 10   | 170  | 5    |
| 194944  | 0    | 7   | 3   | 6   | 6   | 1   | 0   | 1    | 8    | 0    | 1    | 11   | 2    | 4    | 2    | 1    | 6    | 0    | 0    | 1    |
| 166535  | 4    | 15  | 3   | 4   | 4   | 0   | 0   | 0    | 0    | 3    | 0    | 0    | 25   | 18   | 14   | 30   | 1    | 0    | 1    | 5    |
| 247557  | 0    | 2   | 21  | 2   | 53  | 3   | 2   | 0    | 0    | 0    | 1    | 0    | 2    | 0    | 0    | 1    | 3    | 0    | 0    | 14   |
| 1871    | 0    | 25  | 0   | 46  | 26  | 6   | 0   | 0    | 0    | 4    | 6    | 1    | 3    | 2    | 0    | 0    | 0    | 0    | 0    | 3    |
| 350666  | 4    | 46  | 148 | 80  | 29  | 5   | 47  | 59   | 21   | 8    | 10   | 25   | 12   | 12   | 7    | 51   | 21   | 112  | 37   | 23   |
| 190242  | 0    | 3   | 10  | 12  | 0   | 2   | 0   | 0    | 0    | 0    | 17   | 0    | 21   | 20   | 6    | 8    | 20   | 0    | 0    | 0    |
| 100344  | 0    | 0   | 0   | 2   | 0   | 2   | 37  | 1    | 3    | 17   | 32   | 180  | 37   | 1    | 11   | 0    | 0    | 0    | 0    | 0    |
| 186338  | 0    | 35  | 44  | 88  | 289 | 50  | 27  | 0    | 0    | 5    | 2    | 0    | 6    | 2    | 4    | 1    | 0    | 0    | 0    | 0    |
| 542096  | 18   | 128 | 17  | 177 | 39  | 17  | 1   | 16   | 163  | 4    | 9    | 33   | 19   | 25   | 36   | 110  | 167  | 2    | 4    | 0    |
| 619224  | 69   | 25  | 19  | 18  | 20  | 0   | 7   | 20   | 4    | 16   | 2    | 0    | 1    | 2    | 1    | 2    | 23   | 31   | 7    | 57   |
| 179695  | 0    | 2   | 1   | 1   | 1   | 0   | 0   | 0    | 1    | 0    | 0    | 0    | 0    | 1    | 0    | 0    | 2    | 0    | 0    | 0    |
| 263664  | 25   | 159 | 121 | 237 | 304 | 35  | 1   | 1117 | 279  | 20   | 752  | 70   | 142  | 439  | 967  | 766  | 51   | 59   | 190  | 345  |
| 265992  | 0    | 7   | 2   | 3   | 0   | 0   | 0   | 0    | 11   | 2    | 0    | 0    | 0    | 0    | 0    | 62   | 10   | 0    | 0    | 0    |
| 184209  | 1480 | 225 | 352 | 56  | 430 | 43  | 167 | 24   | 61   | 34   | 2    | 27   | 43   | 5    | 108  | 6    | 5    | 42   | 79   | 1    |
| 261992  | 11   | 161 | 256 | 337 | 46  | 4   | 600 | 116  | 197  | 66   | 489  | 1887 | 37   | 271  | 157  | 10   | 85   | 2075 | 1576 | 1320 |
| 299858  | 0    | 7   | 16  | 42  | 9   | 0   | 56  | 1    | 5    | 0    | 1    | 7    | 1    | 0    | 3    | 2    | 5    | 4    | 12   | 0    |
| 259699  | 9    | 48  | 213 | 268 | 42  | 90  | 44  | 145  | 324  | 15   | 84   | 224  | 77   | 60   | 104  | 91   | 65   | 0    | 0    | 58   |
| 193723  | 1    | 7   | 3   | 11  | 18  | 0   | 0   | 0    | 0    | 0    | 10   | 3    | 6    | 11   | 11   | 54   | 12   | 34   | 57   | 32   |
| 204144  | 0    | 14  | 8   | 23  | 1   | 1   | 14  | 0    | 0    | 0    | 13   | 1    | 9    | 13   | 36   | 21   | 6    | 1    | 1    | 0    |
| 199403  | 6    | 8   | 10  | 21  | 24  | 6   | 76  | 11   | 13   | 0    | 0    | 1    | 4    | 0    | 4    | 12   | 7    | 11   | 19   | 21   |
| 1106468 | 8    | 3   | 6   | 4   | 3   | 0   | 0   | 1    | 2    | 1    | 3    | 0    | 5    | 3    | 8    | 13   | 4    | 10   | 13   | 14   |
| 176760  | 1    | 11  | 11  | 14  | 9   | 2   | 1   | 0    | 0    | 1    | 11   | 2    | 13   | 12   | 21   | 6    | 4    | 11   | 9    | 6    |
| 827592  | 0    | 28  | 3   | 24  | 0   | 5   | 1   | 0    | 0    | 0    | 6    | 2    | 1    | 1    | 0    | 1    | 1    | 0    | 0    | 5    |
| 416043  | 34   | 186 | 163 | 312 | 373 | 2   | 1   | 187  | 32   | 3    | 64   | 5    | 14   | 53   | 95   | 47   | 0    | 2    | 6    | 17   |
| 258641  | 0    | 0   | 0   | 0   | 15  | 24  | 1   | 0    | 0    | 0    | 2    | 1    | 0    | 0    | 0    | 1521 | 0    | 0    | 0    | 0    |
| 36647   | 1    | 66  | 26  | 80  | 1   | 7   | 1   | 0    | 3    | 0    | 0    | 0    | 0    | 0    | 1    | 0    | 0    | 0    | 0    | 0    |
| 258423  | 0    | 123 | 38  | 62  | 7   | 21  | 3   | 0    | 0    | 0    | 34   | 141  | 11   | 13   | 6    | 0    | 0    | 0    | 0    | 1    |
| 258421  | 41   | 0   | 5   | 322 | 2   | 88  | 11  | 276  | 249  | 607  | 20   | 3    | 0    | 5    | 150  | 26   | 9    | 0    | 0    | 44   |
| 186555  | 0    | 25  | 60  | 22  | 72  | 7   | 996 | 0    | 1    | 1    | 51   | 185  | 66   | 33   | 238  | 1    | 44   | 4    | 0    | 83   |
| 306699  | 0    | 1   | 8   | 15  | 14  | 3   | 19  | 2    | 3    | 0    | 0    | 0    | 0    | 0    | 0    | 0    | 0    | 0    | 0    | 1    |
| 335267  | 0    | 0   | 13  | 6   | 6   | 0   | 0   | 0    | 0    | 0    | 1    | 2    | 3    | 2    | 1    | 21   | 8    | 19   | 3    | 17   |
| 771177  | 0    | 88  | 6   | 64  | 0   | 5   | 0   | 100  | 154  | 2    | 3    | 10   | 2    | 88   | 91   | 9    | 0    | 0    | 0    | 61   |
| 204171  | 47   | 16  | 25  | 13  | 3   | 1   | 1   | 0    | 0    | 0    | 5    | 0    | 0    | 2    | 6    | 1    | 1    | 4    | 6    | 8    |
| 299267  | 3    | 2   | 1   | 7   | 0   | 0   | 0   | 0    | 0    | 0    | 0    | 0    | 51   | 0    | 1    | 0    | 0    | 0    | 0    | 0    |
| 264802  | 0    | 0   | 11  | 0   | 1   | 3   | 1   | 0    | 0    | 0    | 1    | 0    | 1    | 1    | 0    | 1    | 0    | 0    | 0    | 0    |
| 4296218 | 0    | 20  | 0   | 19  | 47  | 3   | 1   | 0    | 0    | 0    | 2    | 0    | 1    | 12   | 2    | 0    | 0    | 0    | 0    | 8    |
| 162005  | 0    | 7   | 2   | 29  | 28  | 34  | 3   | 1    | 0    | 3    | 32   | 15   | 16   | 24   | 33   | 15   | 16   | 0    | 0    | 25   |
| 176242  | 0    | 49  | 216 | 120 | 3   | 1   | 0   | 0    | 0    | 3    | 0    | 0    | 0    | 0    | 0    | 0    | 1    | 0    | 0    | 0    |
| 310751  | 0    | 4   | 0   | 1   | 0   | 0   | 0   | 0    | 0    | 0    | 14   | 82   | 14   | 32   | 20   | 39   | 1    | 0    | 0    | 6    |
| 813217  | 14   | 95  | 40  | 147 | 11  | 0   | 0   | 0    | 0    | 0    | 0    | 0    | 0    | 0    | 0    | 0    | 0    | 0    | 0    | 0    |
| 165430  | 0    | 4   | 5   | 12  | 0   | 2   | 1   | 0    | 0    | 3    | 33   | 59   | 6    | 6    | 1    | 385  | 15   | 0    | 0    | 103  |

Table S3 E

| ID      | P     | P.1  | P.2  | P.3  | P.4  | P.5   | P.6   | P.7   | P.8   | P.9   | P.10 | P.11 | P.12  | P.13 | P.14  | P.15 | P.16 | P.17 | P.18 | P.19 |
|---------|-------|------|------|------|------|-------|-------|-------|-------|-------|------|------|-------|------|-------|------|------|------|------|------|
| 522371  | 1     | 5    | 4    | 19   | 5    | 0     | 16    | 29    | 27    | 0     | 0    | 2    | 6     | 1    | 9     | 5    | 2    | 5    | 5    | 1    |
| 593043  | 4     | 1    | 4    | 6    | 14   | 7     | 3     | 6     | 4     | 6     | 5    | 1    | 19    | 10   | 17    | 0    | 5    | 13   | 8    | 1    |
| 304047  | 1953  | 2306 | 1752 | 1564 | 3206 | 598   | 606   | 1197  | 2559  | 1748  | 729  | 714  | 2104  | 1084 | 4030  | 4504 | 1047 | 1812 | 4320 | 499  |
| 2084364 | 293   | 13   | 26   | 56   | 8    | 19    | 136   | 554   | 9     | 17    | 4    | 1    | 931   | 11   | 38    | 6    | 2    | 3    | 4    | 1    |
| 313724  | 0     | 3    | 33   | 20   | 1    | 0     | 0     | 1     | 5     | 4     | 1    | 11   | 3     | 3    | 5     | 16   | 4    | 0    | 0    | 34   |
| 2937207 | 0     | 2    | 1    | 22   | 4    | 10    | 40    | 0     | 0     | 23    | 5    | 181  | 108   | 3    | 6     | 0    | 0    | 0    | 0    | 0    |
| 175213  | 0     | 5    | 1    | 4    | 11   | 0     | 0     | 5     | 0     | 1     | 1    | 20   | 0     | 4    | 5     | 1    | 6    | 1    | 1    | 10   |
| 4480555 | 22    | 463  | 785  | 1454 | 825  | 2     | 70    | 422   | 3313  | 569   | 611  | 2101 | 463   | 680  | 1054  | 1288 | 4372 | 5    | 0    | 2359 |
| 4480557 | 27    | 450  | 714  | 1573 | 2    | 0     | 0     | 8     | 18    | 0     | 0    | 1    | 59    | 54   | 153   | 10   | 548  | 0    | 0    | 170  |
| 175077  | 1     | 3    | 2    | 4    | 4    | 0     | 0     | 2     | 1     | 0     | 0    | 0    | 0     | 1    | 2     | 1    | 7    | 1    | 1    | 2    |
| 188266  | 0     | 21   | 3    | 20   | 1    | 1     | 0     | 0     | 1     | 0     | 0    | 0    | 1     | 2    | 4     | 0    | 12   | 0    | 0    | 1    |
| 259578  | 0     | 11   | 11   | 15   | 2    | 15    | 3     | 4     | 2     | 0     | 1    | 1    | 0     | 0    | 0     | 4    | 3    | 1    | 0    | 0    |
| 177512  | 116   | 1    | 37   | 121  | 107  | 18    | 4     | 0     | 0     | 0     | 14   | 0    | 3     | 4    | 11    | 12   | 7    | 52   | 39   | 0    |
| 3319464 | 0     | 0    | 0    | 5    | 0    | 0     | 14    | 0     | 3     | 20    | 78   | 9    | 112   | 0    | 4     | 0    | 0    | 0    | 0    | 0    |
| 3390534 | 3     | 10   | 15   | 43   | 13   | 4     | 27    | 3     | 8     | 1     | 4    | 2    | 2     | 3    | 1     | 1    | 3    | 12   | 4    | 0    |
| 277067  | 0     | 1    | 8    | 9    | 5    | 7     | 1     | 95    | 159   | 2     | 26   | 124  | 88    | 116  | 39    | 87   | 1    | 0    | 0    | 119  |
| 199674  | 0     | 0    | 1    | 1    | 0    | 2     | 0     | 0     | 1     | 0     | 0    | 0    | 0     | 0    | 1     | 53   | 0    | 0    | 0    | 1    |
| 3920500 | 7     | 95   | 161  | 232  | 196  | 140   | 11    | 10    | 36    | 5     | 83   | 441  | 166   | 158  | 89    | 185  | 172  | 0    | 0    | 0    |
| 265483  | 0     | 32   | 0    | 58   | 103  | 31    | 0     | 0     | 0     | 27    | 10   | 20   | 98    | 43   | 17    | 26   | 0    | 0    | 0    | 68   |
| 399606  | 10    | 63   | 34   | 37   | 262  | 6     | 2     | 10    | 2     | 1     | 7    | 23   | 11    | 7    | 9     | 44   | 3    | 3    | 15   | 5    |
| 192971  | 2     | 47   | 576  | 248  | 2    | 1     | 0     | 14    | 58    | 46    | 23   | 123  | 40    | 41   | 48    | 75   | 7    | 0    | 0    | 179  |
| 275218  | 0     | 22   | 61   | 12   | 0    | 81    | 5     | 48    | 63    | 3     | 20   | 82   | 27    | 6    | 7     | 9    | 7    | 0    | 0    | 18   |
| 228043  | 1     | 3    | 7    | 9    | 0    | 0     | 0     | 0     | 0     | 72    | 7    | 6    | 1     | 0    | 0     | 11   | 45   | 1    | 0    | 2    |
| 261486  | 0     | 12   | 10   | 20   | 9    | 1     | 0     | 2     | 6     | 0     | 1    | 1    | 3     | 0    | 0     | 2    | 0    | 0    | 0    | 0    |
| 297577  | 0     | 6    | 5    | 3    | 61   | 3     | 1     | 4     | 2     | 1     | 8    | 7    | 0     | 5    | 0     | 10   | 3    | 4    | 1    | 7    |
| 3150250 | 0     | 3    | 1    | 3    | 6    | 0     | 0     | 0     | 0     | 0     | 0    | 0    | 18    | 28   | 18    | 46   | 6    | 0    | 0    | 113  |
| 578016  | 0     | 0    | 0    | 0    | 0    | 1     | 0     | 0     | 2     | 0     | 1    | 0    | 2     | 1    | 4     | 3    | 0    | 2    | 7    | 0    |
| 637546  | 0     | 2    | 0    | 1    | 0    | 0     | 0     | 0     | 0     | 0     | 0    | 0    | 0     | 0    | 0     | 0    | 0    | 0    | 0    | 0    |
| 195691  | 0     | 1    | 10   | 3    | 19   | 0     | 0     | 0     | 0     | 0     | 0    | 1    | 0     | 0    | 0     | 6    | 10   | 4    | 1    | 6    |
| 4483570 | 6     | 25   | 5    | 12   | 14   | 0     | 6     | 19    | 17    | 0     | 0    | 0    | 12    | 4    | 9     | 26   | 1    | 10   | 27   | 2    |
| 4306262 | 22726 | 495  | 2873 | 6901 | 3834 | 14425 | 14570 | 18207 | 18964 | 23964 | 4124 | 179  | 23576 | 7351 | 29529 | 33   | 493  | 4770 | 6798 | 603  |
| 184451  | 2     | 311  | 424  | 124  | 51   | 8     | 1     | 13    | 7     | 32    | 11   | 0    | 85    | 13   | 49    | 25   | 313  | 0    | 0    | 0    |
| 184456  | 12    | 0    | 1    | 8    | 12   | 2     | 0     | 0     | 0     | 0     | 2    | 0    | 0     | 0    | 4     | 1    | 4    | 27   | 18   | 0    |
| 814952  | 1     | 9    | 2    | 17   | 1    | 0     | 0     | 0     | 0     | 0     | 0    | 0    | 1     | 0    | 1     | 0    | 0    | 0    | 0    | 0    |
| 264225  | 0     | 1    | 3    | 0    | 0    | 0     | 1     | 1     | 2     | 0     | 19   | 3    | 0     | 1    | 1     | 48   | 4    | 0    | 1    | 6    |
| 198865  | 11    | 19   | 20   | 12   | 8    | 2     | 1     | 20    | 1     | 0     | 13   | 0    | 3     | 28   | 36    | 11   | 5    | 4    | 6    | 10   |
| 4405128 | 16    | 368  | 10   | 290  | 0    | 133   | 6     | 0     | 0     | 2     | 149  | 216  | 145   | 85   | 37    | 0    | 0    | 0    | 0    | 25   |
| 3265889 | 0     | 2    | 3    | 4    | 2    | 173   | 9     | 9     | 39    | 551   | 88   | 105  | 7     | 227  | 1533  | 117  | 7    | 1    | 0    | 67   |
| 1107652 | 0     | 30   | 8    | 16   | 6    | 4     | 1     | 0     | 0     | 0     | 13   | 0    | 15    | 13   | 42    | 20   | 23   | 39   | 21   |      |
| 195337  | 0     | 0    | 0    | 0    | 18   | 0     | 0     | 23    | 45    | 12    | 15   | 0    | 0     | 2    | 3     | 880  | 0    | 0    | 0    | 0    |
| 196672  | 0     | 0    | 6    | 27   | 36   | 19    | 0     | 0     | 0     | 0     | 11   | 0    | 4     | 4    | 5     | 7    | 2    | 14   | 24   | 0    |
| 269726  | 3     | 130  | 59   | 56   | 28   | 13    | 3     | 0     | 0     | 0     | 73   | 35   | 53    | 41   | 13    | 41   | 44   | 16   | 31   | 50   |
| 179457  | 378   | 100  | 37   | 23   | 30   | 61    | 4     | 0     | 0     | 1     | 202  | 33   | 56    | 30   | 34    | 3    | 31   | 69   | 13   | 22   |
| 637934  | 5     | 29   | 76   | 59   | 24   | 5     | 1     | 0     | 0     | 0     | 195  | 84   | 43    | 128  | 50    | 19   | 35   | 0    | 0    | 88   |
| 262917  | 2     | 77   | 23   | 139  | 1    | 190   | 19    | 0     | 2     | 0     | 0    | 0    | 0     | 0    | 0     | 0    | 0    | 1    | 0    | 0    |
| 1108599 | 24    | 27   | 31   | 22   | 21   | 3     | 4     | 3     | 3     | 44    | 46   | 4    | 1     | 5    | 11    | 0    | 4    | 0    | 0    | 0    |
| 339329  | 0     | 3    | 1    | 2    | 6    | 0     | 0     | 0     | 2     | 0     | 0    | 0    | 0     | 0    | 1     | 17   | 7    | 1    | 0    | 0    |
| 2875735 | 0     | 0    | 2    | 0    | 1    | 698   | 1989  | 307   | 991   | 580   | 35   | 728  | 940   | 210  | 2384  | 292  | 98   | 1261 | 2444 | 173  |
| 4402834 | 0     | 2    | 13   | 5    | 1    | 0     | 0     | 0     | 0     | 0     | 0    | 0    | 2     | 1    | 4     | 16   | 0    | 0    | 0    | 3    |
| 313898  | 0     | 5    | 5    | 17   | 0    | 0     | 0     | 1     | 2     | 0     | 0    | 0    | 1     | 2    | 4     | 0    | 11   | 0    | 0    | 3    |
| 176071  | 18    | 29   | 26   | 16   | 24   | 2     | 57    | 2     | 11    | 3     | 1    | 3    | 0     | 3    | 22    | 0    | 1    | 0    | 0    | 1    |
| 277497  | 0     | 5    | 3    | 0    | 6    | 0     | 0     | 0     | 0     | 0     | 0    | 0    | 1     | 0    | 0     | 28   | 0    | 0    | 0    | 3    |

Table S3 E

| ID      | P     | P.1   | P.2   | P.3   | P.4   | P.5   | P.6  | P.7  | P.8   | P.9 | P.10  | P.11  | P.12 | P.13 | P.14  | P.15 | P.16  | P.17 | P.18 | P.19 |
|---------|-------|-------|-------|-------|-------|-------|------|------|-------|-----|-------|-------|------|------|-------|------|-------|------|------|------|
| 349343  | 0     | 1     | 0     | 0     | 5     | 0     | 0    | 0    | 0     | 0   | 0     | 0     | 3    | 0    | 4     | 16   | 0     | 0    | 0    | 0    |
| 203605  | 628   | 146   | 293   | 113   | 26    | 17    | 9    | 0    | 0     | 0   | 25    | 6     | 3    | 25   | 96    | 15   | 10    | 15   | 11   | 25   |
| 4389125 | 2     | 3     | 2     | 3     | 1     | 21    | 2774 | 59   | 395   | 213 | 93    | 121   | 66   | 70   | 1135  | 96   | 31    | 15   | 36   | 6    |
| 170926  | 1     | 14    | 1     | 144   | 1     | 39    | 6    | 0    | 0     | 1   | 0     | 0     | 0    | 0    | 1     | 0    | 0     | 0    | 0    | 1    |
| 4448052 | 0     | 9     | 100   | 79    | 68    | 42    | 257  | 18   | 67    | 1   | 12    | 35    | 14   | 2    | 1     | 3    | 7     | 0    | 0    | 12   |
| 174698  | 0     | 6     | 9     | 7     | 13    | 5     | 0    | 1    | 3     | 0   | 1     | 3     | 0    | 3    | 8     | 6    | 8     | 0    | 0    | 1    |
| 332962  | 0     | 16    | 7     | 14    | 161   | 5     | 0    | 6    | 1     | 1   | 11    | 13    | 2    | 6    | 6     | 16   | 7     | 7    | 3    | 10   |
| 3610691 | 36    | 1     | 2     | 8     | 2     | 0     | 10   | 7    | 1     | 0   | 1     | 1     | 3960 | 12   | 165   | 1    | 0     | 10   | 21   | 0    |
| 4390754 | 0     | 26    | 77    | 82    | 4     | 0     | 0    | 0    | 0     | 2   | 0     | 0     | 0    | 0    | 0     | 0    | 0     | 0    | 0    | 0    |
| 4457427 | 0     | 16    | 24    | 0     | 0     | 0     | 0    | 0    | 0     | 0   | 0     | 0     | 0    | 0    | 0     | 0    | 0     | 0    | 0    | 0    |
| 320169  | 17    | 0     | 0     | 11    | 0     | 0     | 31   | 399  | 230   | 622 | 8     | 3     | 39   | 14   | 102   | 3    | 3     | 4    | 0    | 4    |
| 265116  | 0     | 0     | 2     | 14    | 0     | 157   | 3    | 0    | 0     | 2   | 0     | 0     | 2    | 0    | 0     | 5    | 1     | 0    | 0    | 0    |
| 269125  | 124   | 22    | 38    | 40    | 37    | 1     | 42   | 134  | 44    | 107 | 5     | 5     | 2    | 16   | 9     | 30   | 159   | 89   | 64   | 292  |
| 4449518 | 4     | 1091  | 215   | 488   | 51    | 55    | 5    | 0    | 0     | 3   | 210   | 9     | 73   | 237  | 325   | 900  | 249   | 0    | 0    | 527  |
| 561069  | 85    | 89    | 40    | 68    | 9     | 1     | 7    | 0    | 0     | 12  | 5     | 4     | 1    | 6    | 2     | 6    | 21    | 0    | 0    | 4    |
| 299171  | 0     | 1     | 8     | 3     | 9     | 0     | 0    | 0    | 0     | 0   | 0     | 0     | 0    | 0    | 0     | 0    | 1     | 2    | 0    | 0    |
| 40230   | 0     | 0     | 0     | 0     | 0     | 0     | 0    | 0    | 0     | 0   | 0     | 0     | 0    | 0    | 0     | 41   | 10    | 43   | 2    | 107  |
| 569818  | 6     | 58    | 16    | 67    | 11    | 1     | 6    | 5    | 29    | 2   | 1     | 7     | 3    | 5    | 4     | 6    | 6     | 10   | 1    | 1    |
| 319219  | 0     | 5     | 4     | 4     | 2     | 3     | 0    | 0    | 1     | 0   | 0     | 1     | 4    | 1    | 0     | 12   | 11    | 0    | 0    | 4    |
| 198964  | 391   | 124   | 229   | 113   | 12    | 38    | 18   | 0    | 0     | 0   | 46    | 4     | 6    | 30   | 104   | 30   | 17    | 17   | 16   | 47   |
| 618010  | 0     | 7     | 2     | 10    | 0     | 0     | 0    | 0    | 0     | 0   | 0     | 0     | 0    | 0    | 2     | 0    | 0     | 0    | 0    | 0    |
| 342075  | 0     | 4     | 5     | 3     | 4     | 1     | 0    | 4    | 0     | 0   | 1     | 1     | 1    | 0    | 0     | 1    | 2     | 0    | 0    | 0    |
| 135956  | 12    | 3     | 8     | 3     | 4     | 0     | 0    | 1    | 1     | 0   | 0     | 0     | 0    | 0    | 0     | 0    | 0     | 0    | 0    | 0    |
| 3919797 | 15    | 94    | 98    | 77    | 36    | 28    | 6    | 0    | 0     | 32  | 43    | 188   | 27   | 15   | 11    | 123  | 29    | 0    | 2    | 23   |
| 265301  | 0     | 21    | 6     | 22    | 13    | 1     | 0    | 0    | 0     | 1   | 0     | 0     | 1    | 0    | 0     | 6    | 5     | 0    | 0    | 1    |
| 578058  | 0     | 2     | 2     | 2     | 0     | 0     | 0    | 0    | 0     | 0   | 0     | 0     | 0    | 0    | 1     | 0    | 0     | 0    | 0    | 0    |
| 10196   | 0     | 1     | 0     | 1     | 0     | 0     | 0    | 0    | 0     | 0   | 0     | 0     | 0    | 0    | 1     | 0    | 0     | 0    | 0    | 0    |
| 259511  | 0     | 0     | 0     | 2     | 2     | 0     | 0    | 0    | 0     | 0   | 0     | 0     | 0    | 0    | 0     | 0    | 0     | 0    | 0    | 19   |
| 183619  | 7     | 4     | 10    | 11    | 21    | 1     | 8    | 5    | 8     | 4   | 2     | 3     | 10   | 3    | 18    | 20   | 1     | 7    | 9    | 0    |
| 261076  | 2     | 0     | 0     | 0     | 0     | 0     | 0    | 0    | 0     | 0   | 0     | 0     | 0    | 0    | 0     | 0    | 0     | 0    | 0    | 0    |
| 270391  | 14    | 78    | 10    | 96    | 57    | 3     | 555  | 1030 | 832   | 90  | 3     | 12    | 483  | 120  | 458   | 151  | 16    | 125  | 186  | 16   |
| 4440624 | 0     | 15    | 2     | 8     | 22    | 19    | 12   | 0    | 1     | 24  | 7     | 5     | 114  | 24   | 7     | 8    | 7     | 0    | 1    | 16   |
| 4460604 | 1     | 0     | 141   | 0     | 0     | 0     | 0    | 0    | 0     | 0   | 0     | 0     | 1    | 0    | 1     | 1    | 0     | 0    | 0    | 2    |
| 95424   | 0     | 38    | 247   | 139   | 1     | 3     | 1    | 7    | 27    | 0   | 7     | 11    | 1    | 3    | 5     | 4    | 12    | 1    | 0    | 13   |
| 436341  | 0     | 4     | 4     | 8     | 15    | 0     | 0    | 0    | 0     | 0   | 2     | 1     | 2    | 4    | 2     | 6    | 2     | 1    | 1    | 0    |
| 295075  | 0     | 9     | 25    | 12    | 55    | 1     | 0    | 1    | 3     | 1   | 0     | 1     | 0    | 0    | 1     | 4    | 1     | 4    | 0    | 8    |
| 1678333 | 0     | 3     | 4     | 6     | 1     | 0     | 0    | 0    | 0     | 26  | 26    | 1     | 3    | 4    | 1     | 1    | 0     | 0    | 0    | 676  |
| 243185  | 0     | 2     | 1     | 0     | 0     | 0     | 0    | 0    | 0     | 0   | 0     | 0     | 0    | 0    | 0     | 0    | 0     | 0    | 0    | 0    |
| 175998  | 0     | 3     | 3     | 16    | 0     | 5     | 0    | 3    | 5     | 6   | 0     | 0     | 1    | 0    | 0     | 4    | 0     | 13   | 9    | 0    |
| 3267277 | 26    | 226   | 92    | 332   | 18    | 0     | 0    | 0    | 0     | 0   | 0     | 0     | 0    | 0    | 3     | 0    | 0     | 0    | 0    | 0    |
| 1931575 | 0     | 0     | 0     | 6     | 11    | 1     | 0    | 48   | 3     | 3   | 1     | 2     | 0    | 2    | 1     | 0    | 4     | 0    | 0    | 5    |
| 337784  | 0     | 16    | 41    | 46    | 3     | 3     | 1    | 0    | 0     | 1   | 3     | 0     | 3    | 0    | 0     | 7    | 6     | 0    | 0    | 12   |
| 1921818 | 1     | 24    | 47    | 56    | 57    | 9     | 0    | 0    | 0     | 0   | 1     | 0     | 0    | 0    | 1     | 0    | 1     | 0    | 0    | 1    |
| 3172949 | 0     | 117   | 239   | 62    | 15    | 20    | 234  | 0    | 0     | 1   | 597   | 51    | 90   | 198  | 1406  | 39   | 46    | 337  | 509  | 131  |
| 3172943 | 3     | 10    | 5     | 6     | 22    | 6     | 1    | 0    | 1     | 1   | 7     | 2     | 9    | 14   | 12    | 14   | 3     | 10   | 6    | 4    |
| 645358  | 0     | 188   | 213   | 63    | 35    | 3     | 2    | 7    | 25    | 4   | 0     | 1     | 16   | 11   | 14    | 4    | 5     | 22   | 39   | 0    |
| 838685  | 0     | 0     | 0     | 0     | 3     | 0     | 467  | 0    | 0     | 3   | 0     | 3     | 11   | 1    | 253   | 8    | 6     | 57   | 105  | 11   |
| 828284  | 47    | 289   | 131   | 482   | 25    | 0     | 1    | 0    | 0     | 0   | 1     | 1     | 1    | 1    | 14    | 0    | 0     | 0    | 0    | 0    |
| 1111755 | 17547 | 25699 | 21624 | 11232 | 18443 | 10874 | 2003 | 7996 | 12932 | 235 | 13973 | 10690 | 6564 | 9649 | 18647 | 0    | 18502 | 14   | 5    | 0    |
| 188878  | 4     | 155   | 392   | 176   | 31    | 7     | 0    | 438  | 400   | 14  | 11    | 54    | 4    | 15   | 7     | 19   | 35    | 0    | 0    | 8    |
| 4401580 | 6     | 28    | 19    | 18    | 28    | 2     | 200  | 3    | 26    | 16  | 3     | 2     | 32   | 3    | 44    | 5    | 1     | 2    | 2    | 0    |
| 317854  | 572   | 24    | 101   | 66    | 7     | 0     | 0    | 0    | 0     | 0   | 0     | 0     | 0    | 0    | 0     | 0    | 1     | 0    | 0    | 2    |



Table S3 E

| ID      | P   | P.1 | P.2  | P.3 | P.4  | P.5  | P.6  | P.7 | P.8 | P.9 | P.10 | P.11 | P.12 | P.13 | P.14 | P.15 | P.16 | P.17 | P.18 | P.19 |
|---------|-----|-----|------|-----|------|------|------|-----|-----|-----|------|------|------|------|------|------|------|------|------|------|
| 4256470 | 182 | 7   | 10   | 13  | 0    | 0    | 531  | 416 | 106 | 48  | 18   | 7    | 135  | 31   | 38   | 22   | 53   | 18   | 35   | 51   |
| 839558  | 3   | 33  | 43   | 26  | 27   | 11   | 1    | 8   | 1   | 0   | 2    | 2    | 6    | 6    | 6    | 1    | 0    | 0    | 0    | 2    |
| 185743  | 0   | 29  | 15   | 18  | 101  | 17   | 1    | 0   | 3   | 6   | 1    | 1    | 4    | 22   | 17   | 37   | 28   | 2    | 2    | 2    |
| 4378740 | 13  | 0   | 0    | 4   | 0    | 0    | 2131 | 2   | 4   | 20  | 31   | 256  | 0    | 519  | 1651 | 62   | 0    | 279  | 578  | 6    |
| 266206  | 1   | 20  | 10   | 19  | 7    | 1    | 0    | 0   | 0   | 1   | 1    | 3    | 2    | 2    | 1    | 9    | 1    | 0    | 0    | 0    |
| 270513  | 0   | 2   | 2    | 1   | 0    | 0    | 0    | 0   | 0   | 0   | 0    | 0    | 0    | 0    | 0    | 34   | 4    | 0    | 0    | 2    |
| 334697  | 0   | 1   | 0    | 1   | 0    | 0    | 0    | 0   | 0   | 0   | 4    | 1    | 0    | 0    | 2    | 5    | 4    | 107  | 5    | 10   |
| 4352471 | 2   | 5   | 7    | 14  | 0    | 0    | 0    | 0   | 0   | 0   | 0    | 0    | 0    | 0    | 2    | 0    | 0    | 0    | 0    | 0    |
| 4426367 | 189 | 25  | 151  | 99  | 93   | 21   | 82   | 1   | 0   | 3   | 1    | 6    | 87   | 12   | 35   | 4    | 2    | 0    | 0    | 4    |
| 209030  | 18  | 177 | 147  | 148 | 2    | 75   | 893  | 1   | 0   | 10  | 152  | 40   | 208  | 85   | 582  | 117  | 57   | 533  | 653  | 175  |
| 190646  | 0   | 2   | 2    | 7   | 0    | 2    | 0    | 0   | 0   | 0   | 5    | 11   | 6    | 3    | 2    | 2    | 0    | 1    | 0    | 2    |
| 172389  | 0   | 2   | 0    | 0   | 0    | 1    | 0    | 0   | 0   | 0   | 0    | 2    | 0    | 0    | 0    | 0    | 0    | 0    | 0    | 6    |
| 213896  | 3   | 171 | 69   | 125 | 10   | 4    | 2    | 0   | 0   | 108 | 84   | 66   | 29   | 47   | 24   | 16   | 84   | 0    | 0    | 19   |
| 161762  | 0   | 111 | 4    | 7   | 1    | 4    | 2    | 0   | 1   | 0   | 2    | 1    | 0    | 0    | 1    | 1    | 2    | 0    | 0    | 2    |
| 174441  | 2   | 50  | 50   | 54  | 286  | 4    | 0    | 0   | 6   | 0   | 4    | 4    | 12   | 10   | 11   | 24   | 9    | 0    | 0    | 8    |
| 135625  | 0   | 4   | 6    | 18  | 0    | 22   | 1    | 13  | 32  | 19  | 0    | 1    | 5    | 0    | 0    | 5    | 2    | 146  | 140  | 5    |
| 4365109 | 0   | 0   | 0    | 1   | 0    | 0    | 0    | 1   | 1   | 0   | 1    | 1    | 0    | 0    | 0    | 12   | 2    | 19   | 1    | 24   |
| 832558  | 0   | 21  | 154  | 156 | 135  | 134  | 962  | 71  | 200 | 6   | 42   | 166  | 47   | 23   | 9    | 14   | 43   | 0    | 0    | 27   |
| 4464113 | 29  | 65  | 122  | 223 | 118  | 179  | 13   | 113 | 185 | 6   | 42   | 236  | 174  | 43   | 319  | 136  | 208  | 1    | 0    | 91   |
| 1105376 | 621 | 0   | 5    | 398 | 0    | 1    | 168  | 0   | 0   | 12  | 2107 | 878  | 506  | 620  | 1111 | 2004 | 251  | 1    | 3    | 137  |
| 346275  | 1   | 11  | 13   | 23  | 11   | 0    | 4    | 0   | 1   | 0   | 0    | 0    | 0    | 0    | 0    | 1    | 0    | 6    | 0    | 3    |
| 3505032 | 999 | 24  | 171  | 120 | 11   | 0    | 0    | 0   | 0   | 0   | 0    | 0    | 0    | 0    | 0    | 23   | 63   | 13   | 39   | 28   |
| 4355436 | 0   | 0   | 2    | 1   | 0    | 55   | 14   | 3   | 0   | 2   | 60   | 87   | 2    | 2    | 52   | 4    | 0    | 0    | 0    | 0    |
| 4480176 | 8   | 222 | 277  | 331 | 1222 | 159  | 22   | 0   | 0   | 0   | 26   | 13   | 6    | 23   | 13   | 7    | 0    | 0    | 0    | 143  |
| 344527  | 0   | 17  | 121  | 81  | 4    | 21   | 3    | 1   | 1   | 0   | 0    | 1    | 10   | 10   | 37   | 24   | 11   | 0    | 0    | 9    |
| 4372003 | 251 | 17  | 11   | 45  | 40   | 220  | 1806 | 126 | 257 | 509 | 22   | 13   | 3373 | 67   | 1108 | 37   | 13   | 170  | 231  | 14   |
| 172464  | 0   | 0   | 0    | 0   | 0    | 1343 | 116  | 162 | 177 | 15  | 46   | 245  | 59   | 24   | 311  | 122  | 218  | 1    | 0    | 0    |
| 289709  | 100 | 4   | 18   | 32  | 4    | 0    | 11   | 27  | 0   | 0   | 0    | 0    | 9    | 0    | 0    | 0    | 0    | 0    | 0    | 0    |
| 174854  | 4   | 61  | 53   | 32  | 0    | 7    | 1    | 11  | 32  | 32  | 1    | 2    | 0    | 2    | 3    | 0    | 2    | 3    | 6    | 32   |
| 830014  | 0   | 14  | 153  | 17  | 0    | 7    | 0    | 0   | 0   | 0   | 37   | 116  | 46   | 9    | 5    | 85   | 0    | 0    | 0    | 51   |
| 189666  | 0   | 5   | 13   | 4   | 12   | 2    | 1    | 5   | 3   | 0   | 2    | 8    | 1    | 4    | 0    | 10   | 7    | 0    | 0    | 10   |
| 304416  | 0   | 2   | 9    | 8   | 5    | 1    | 0    | 2   | 1   | 0   | 1    | 0    | 0    | 0    | 0    | 3    | 0    | 0    | 0    | 0    |
| 214835  | 7   | 33  | 4    | 33  | 21   | 1    | 0    | 11  | 88  | 3   | 31   | 52   | 3    | 10   | 22   | 40   | 34   | 1    | 0    | 31   |
| 260346  | 1   | 7   | 5    | 0   | 0    | 2    | 1    | 0   | 0   | 2   | 3    | 5    | 0    | 0    | 0    | 0    | 1    | 0    | 0    | 71   |
| 195445  | 0   | 1   | 174  | 28  | 0    | 2    | 0    | 0   | 0   | 0   | 0    | 0    | 13   | 7    | 4    | 0    | 0    | 0    | 0    | 0    |
| 263420  | 2   | 10  | 7    | 15  | 17   | 21   | 1    | 8   | 2   | 8   | 26   | 3    | 10   | 35   | 28   | 19   | 4    | 4    | 17   | 6    |
| 187959  | 1   | 9   | 1    | 8   | 31   | 3    | 0    | 45  | 4   | 3   | 12   | 1    | 3    | 7    | 10   | 8    | 0    | 1    | 1    | 5    |
| 199707  | 2   | 10  | 4    | 11  | 17   | 0    | 0    | 45  | 5   | 45  | 12   | 0    | 34   | 6    | 11   | 5    | 1    | 1    | 9    | 0    |
| 175485  | 1   | 11  | 1    | 4   | 54   | 11   | 2    | 4   | 4   | 1   | 0    | 3    | 23   | 2    | 35   | 2    | 0    | 9    | 4    | 1    |
| 193064  | 0   | 14  | 3    | 23  | 0    | 0    | 0    | 46  | 43  | 2   | 18   | 33   | 5    | 14   | 5    | 169  | 133  | 0    | 0    | 149  |
| 174285  | 0   | 124 | 41   | 21  | 0    | 8    | 1    | 0   | 0   | 169 | 0    | 0    | 7    | 11   | 1    | 14   | 13   | 0    | 0    | 4    |
| 1110752 | 108 | 578 | 1250 | 876 | 968  | 233  | 17   | 606 | 223 | 14  | 207  | 16   | 145  | 127  | 94   | 161  | 128  | 393  | 162  | 20   |
| 177414  | 2   | 20  | 9    | 13  | 13   | 20   | 3    | 0   | 0   | 0   | 13   | 2    | 11   | 31   | 47   | 6    | 2    | 4    | 2    | 12   |
| 882782  | 1   | 22  | 12   | 12  | 22   | 0    | 0    | 13  | 3   | 7   | 4    | 0    | 4    | 0    | 4    | 0    | 0    | 3    | 3    | 1    |
| 180465  | 0   | 15  | 6    | 4   | 1    | 1    | 0    | 0   | 0   | 3   | 0    | 0    | 0    | 0    | 0    | 1    | 0    | 0    | 0    | 0    |
| 1113553 | 0   | 0   | 1    | 1   | 1    | 0    | 0    | 0   | 0   | 0   | 0    | 0    | 0    | 0    | 0    | 31   | 76   | 24   | 54   | 46   |
| 347490  | 4   | 33  | 4    | 47  | 6    | 1    | 1    | 4   | 36  | 0   | 9    | 16   | 7    | 23   | 13   | 21   | 106  | 4    | 0    | 3    |
| 322991  | 2   | 12  | 10   | 28  | 0    | 19   | 0    | 0   | 0   | 0   | 24   | 6    | 0    | 0    | 1    | 3    | 1    | 6    | 6    | 8    |
| 4327628 | 44  | 2   | 5    | 7   | 0    | 0    | 1    | 3   | 1   | 0   | 0    | 0    | 523  | 3    | 25   | 0    | 0    | 1    | 7    | 0    |
| 819999  | 1   | 9   | 4    | 22  | 0    | 0    | 0    | 0   | 0   | 0   | 0    | 0    | 0    | 0    | 1    | 0    | 0    | 0    | 0    | 0    |
| 4402077 | 1   | 50  | 6    | 8   | 3    | 0    | 0    | 0   | 0   | 0   | 0    | 0    | 0    | 0    | 0    | 2    | 0    | 0    | 0    | 2    |
| 63144   | 338 | 8   | 58   | 38  | 5    | 0    | 0    | 0   | 0   | 0   | 0    | 0    | 0    | 0    | 0    | 7    | 31   | 14   | 14   | 28   |

Table S3 E

| ID      | P    | P.1  | P.2  | P.3   | P.4  | P.5  | P.6 | P.7  | P.8  | P.9 | P.10 | P.11 | P.12 | P.13 | P.14 | P.15 | P.16  | P.17 | P.18 | P.19 |
|---------|------|------|------|-------|------|------|-----|------|------|-----|------|------|------|------|------|------|-------|------|------|------|
| 233691  | 0    | 17   | 162  | 54    | 0    | 28   | 0   | 8    | 99   | 4   | 0    | 4    | 0    | 0    | 0    | 0    | 1     | 0    | 0    | 0    |
| 1108453 | 11   | 422  | 2297 | 1594  | 19   | 12   | 0   | 1    | 8    | 17  | 2    | 4    | 1    | 0    | 1    | 30   | 15    | 0    | 0    | 0    |
| 38278   | 42   | 10   | 76   | 20    | 2    | 91   | 21  | 0    | 0    | 3   | 80   | 1    | 81   | 176  | 66   | 35   | 3     | 0    | 0    | 35   |
| 181419  | 0    | 5    | 15   | 11    | 17   | 1    | 1   | 1    | 0    | 0   | 9    | 4    | 0    | 2    | 1    | 24   | 1     | 0    | 1    | 25   |
| 183675  | 1    | 73   | 69   | 135   | 45   | 52   | 4   | 162  | 367  | 15  | 62   | 74   | 122  | 27   | 28   | 42   | 1     | 1    | 0    | 105  |
| 259901  | 0    | 0    | 0    | 0     | 0    | 0    | 0   | 0    | 0    | 0   | 0    | 0    | 0    | 0    | 1    | 4    | 0     | 0    | 0    | 0    |
| 322839  | 1    | 638  | 1195 | 161   | 1229 | 322  | 36  | 1632 | 2011 | 77  | 1372 | 1115 | 610  | 1235 | 559  | 1352 | 22    | 1065 | 512  | 161  |
| 194388  | 2    | 11   | 25   | 90    | 6    | 2    | 338 | 11   | 49   | 2   | 10   | 36   | 3    | 1    | 8    | 10   | 44    | 23   | 66   | 3    |
| 307416  | 0    | 0    | 0    | 0     | 62   | 9    | 1   | 0    | 0    | 45  | 21   | 45   | 1    | 0    | 0    | 12   | 227   | 1459 | 1378 | 521  |
| 190063  | 0    | 111  | 143  | 39    | 32   | 0    | 0   | 2    | 0    | 1   | 1    | 0    | 8    | 0    | 7    | 0    | 26    | 0    | 0    | 0    |
| 313274  | 0    | 6    | 18   | 7     | 185  | 6    | 2   | 2    | 2    | 1   | 0    | 2    | 4    | 0    | 1    | 3    | 1     | 0    | 0    | 2    |
| 1136443 | 117  | 7829 | 16   | 13696 | 5791 | 5599 | 157 | 0    | 3    | 7   | 4469 | 4250 | 3466 | 4336 | 1815 | 0    | 0     | 0    | 0    | 288  |
| 421893  | 0    | 2    | 1    | 1     | 13   | 0    | 1   | 1    | 0    | 0   | 2    | 1    | 4    | 3    | 1    | 6    | 3     | 0    | 2    | 0    |
| 3325760 | 0    | 0    | 0    | 0     | 15   | 0    | 0   | 0    | 0    | 0   | 0    | 0    | 0    | 1    | 0    | 1    | 10    | 0    | 0    | 0    |
| 343130  | 1    | 12   | 0    | 13    | 0    | 0    | 0   | 0    | 10   | 0   | 0    | 0    | 0    | 17   | 10   | 0    | 181   | 2    | 0    | 0    |
| 174260  | 0    | 2    | 58   | 45    | 0    | 5    | 0   | 0    | 0    | 0   | 36   | 27   | 5    | 1    | 0    | 48   | 14    | 0    | 0    | 44   |
| 4453627 | 0    | 5    | 11   | 6     | 2    | 5    | 1   | 0    | 0    | 0   | 1    | 0    | 0    | 1    | 3    | 215  | 0     | 0    | 0    | 2    |
| 348785  | 0    | 1    | 0    | 0     | 22   | 4    | 0   | 1    | 0    | 0   | 0    | 0    | 0    | 5    | 3    | 8    | 0     | 0    | 0    | 0    |
| 189789  | 0    | 2    | 2    | 8     | 2    | 0    | 1   | 0    | 0    | 0   | 0    | 1    | 0    | 0    | 0    | 0    | 0     | 0    | 1    | 5    |
| 3056461 | 5    | 117  | 51   | 42    | 273  | 13   | 5   | 20   | 29   | 3   | 3    | 4    | 17   | 2    | 21   | 47   | 15    | 111  | 83   | 23   |
| 188785  | 0    | 1    | 0    | 0     | 85   | 17   | 2   | 0    | 0    | 0   | 300  | 276  | 44   | 31   | 17   | 0    | 94    | 0    | 0    | 0    |
| 354736  | 0    | 3    | 0    | 4     | 2    | 60   | 7   | 665  | 175  | 19  | 92   | 465  | 61   | 89   | 52   | 422  | 384   | 3    | 1    | 182  |
| 263953  | 0    | 5    | 7    | 9     | 8    | 0    | 15  | 0    | 0    | 0   | 0    | 8    | 1    | 0    | 4    | 1    | 1     | 0    | 0    | 0    |
| 635304  | 19   | 178  | 82   | 310   | 15   | 0    | 0   | 0    | 0    | 0   | 0    | 0    | 1    | 1    | 1    | 0    | 0     | 0    | 0    | 0    |
| 309663  | 164  | 1493 | 5    | 2106  | 5    | 0    | 1   | 1    | 3651 | 80  | 74   | 10   | 156  | 1466 | 3064 | 11   | 18361 | 42   | 9    | 2    |
| 198604  | 42   | 14   | 27   | 13    | 0    | 2    | 0   | 0    | 0    | 0   | 9    | 0    | 3    | 5    | 33   | 4    | 2     | 2    | 4    | 8    |
| 205160  | 9    | 12   | 11   | 24    | 32   | 18   | 0   | 48   | 9    | 18  | 17   | 5    | 2    | 11   | 19   | 7    | 4     | 7    | 15   | 8    |
| 264657  | 0    | 37   | 24   | 17    | 4    | 3    | 1   | 1    | 0    | 4   | 1    | 0    | 180  | 107  | 413  | 253  | 21    | 189  | 153  | 87   |
| 273928  | 1    | 11   | 21   | 39    | 7    | 3    | 0   | 1    | 3    | 0   | 0    | 4    | 3    | 4    | 4    | 1    | 2     | 0    | 0    | 1    |
| 197025  | 0    | 58   | 605  | 229   | 2    | 0    | 1   | 11   | 19   | 19  | 19   | 29   | 17   | 19   | 30   | 27   | 3     | 0    | 0    | 42   |
| 157999  | 1    | 0    | 1    | 0     | 31   | 15   | 1   | 14   | 116  | 2   | 22   | 169  | 114  | 77   | 30   | 339  | 2     | 0    | 0    | 1    |
| 385545  | 1    | 36   | 21   | 24    | 137  | 6    | 3   | 6    | 0    | 0   | 5    | 3    | 7    | 5    | 6    | 106  | 0     | 4    | 6    | 6    |
| 186777  | 0    | 13   | 41   | 41    | 20   | 7    | 19  | 2    | 37   | 0   | 5    | 1    | 1    | 0    | 152  | 5    | 26    | 0    | 0    | 57   |
| 30067   | 0    | 29   | 33   | 307   | 66   | 16   | 1   | 1    | 2    | 0   | 1    | 2    | 32   | 26   | 15   | 0    | 1     | 1    | 1    | 1    |
| 177205  | 4    | 8    | 5    | 12    | 24   | 5    | 0   | 58   | 5    | 16  | 6    | 0    | 8    | 10   | 9    | 8    | 0     | 5    | 8    | 1    |
| 4401375 | 100  | 26   | 31   | 24    | 85   | 31   | 157 | 191  | 254  | 140 | 12   | 2    | 120  | 14   | 174  | 4    | 2     | 71   | 505  | 5    |
| 176139  | 0    | 0    | 0    | 0     | 7    | 1    | 0   | 0    | 0    | 19  | 11   | 1    | 0    | 1    | 0    | 2    | 0     | 0    | 0    | 9    |
| 3998912 | 2    | 0    | 0    | 0     | 1106 | 666  | 57  | 0    | 0    | 4   | 0    | 0    | 0    | 0    | 0    | 0    | 0     | 0    | 0    | 0    |
| 175114  | 2    | 74   | 418  | 285   | 0    | 0    | 0   | 0    | 0    | 2   | 0    | 0    | 0    | 0    | 0    | 2    | 5     | 0    | 0    | 0    |
| 176868  | 5    | 1    | 0    | 1     | 0    | 0    | 2   | 99   | 410  | 6   | 103  | 10   | 0    | 0    | 196  | 1    | 10    | 0    | 0    | 83   |
| 191878  | 0    | 0    | 0    | 1     | 30   | 3    | 0   | 63   | 314  | 103 | 0    | 0    | 13   | 9    | 56   | 1073 | 35    | 0    | 0    | 125  |
| 259195  | 0    | 5    | 11   | 18    | 17   | 2    | 0   | 0    | 1    | 0   | 0    | 1    | 3    | 7    | 4    | 1    | 0     | 0    | 0    | 0    |
| 174791  | 43   | 19   | 22   | 30    | 19   | 0    | 37  | 180  | 124  | 188 | 49   | 3    | 55   | 15   | 100  | 171  | 131   | 168  | 154  | 32   |
| 2624257 | 1690 | 256  | 376  | 76    | 453  | 20   | 25  | 7    | 19   | 5   | 0    | 17   | 20   | 8    | 63   | 28   | 17    | 133  | 276  | 19   |
| 271734  | 0    | 1    | 10   | 19    | 0    | 0    | 0   | 0    | 0    | 0   | 0    | 0    | 0    | 0    | 0    | 6    | 21    | 0    | 0    | 25   |
| 174420  | 13   | 1    | 9    | 6     | 1    | 5    | 3   | 0    | 0    | 1   | 2    | 0    | 2    | 2    | 1    | 5    | 0     | 0    | 0    | 1    |
| 1517779 | 26   | 336  | 145  | 86    | 723  | 343  | 137 | 472  | 821  | 58  | 41   | 107  | 312  | 95   | 500  | 75   | 32    | 287  | 253  | 39   |
| 1108378 | 0    | 8    | 33   | 15    | 0    | 0    | 0   | 0    | 0    | 0   | 0    | 3    | 3    | 1    | 5    | 9    | 11    | 0    | 0    | 0    |
| 319816  | 2    | 28   | 62   | 43    | 18   | 2    | 1   | 25   | 12   | 1   | 0    | 7    | 11   | 9    | 1    | 241  | 31    | 20   | 6    | 12   |
| 606063  | 0    | 1    | 2    | 8     | 0    | 0    | 0   | 0    | 0    | 0   | 0    | 0    | 0    | 0    | 1    | 0    | 0     | 0    | 0    | 0    |
| 4420272 | 4    | 0    | 0    | 0     | 140  | 25   | 2   | 33   | 266  | 3   | 8    | 75   | 35   | 28   | 14   | 136  | 0     | 1    | 0    | 0    |
| 266091  | 0    | 9    | 21   | 11    | 5    | 0    | 0   | 2    | 3    | 12  | 0    | 1    | 0    | 1    | 0    | 0    | 1     | 0    | 0    | 0    |

Table S3 E

| ID      | P   | P.1  | P.2  | P.3 | P.4  | P.5 | P.6  | P.7 | P.8 | P.9 | P.10 | P.11 | P.12 | P.13 | P.14 | P.15 | P.16 | P.17 | P.18 | P.19 |
|---------|-----|------|------|-----|------|-----|------|-----|-----|-----|------|------|------|------|------|------|------|------|------|------|
| 177014  | 402 | 449  | 529  | 945 | 470  | 850 | 522  | 1   | 0   | 24  | 2779 | 560  | 597  | 1381 | 2750 | 1613 | 562  | 827  | 2012 | 1181 |
| 2978254 | 1   | 46   | 274  | 716 | 437  | 439 | 24   | 25  | 76  | 8   | 2    | 1    | 2    | 21   | 42   | 17   | 184  | 0    | 0    | 27   |
| 51677   | 0   | 345  | 155  | 358 | 522  | 25  | 3    | 71  | 102 | 4   | 23   | 98   | 11   | 132  | 70   | 76   | 76   | 50   | 71   | 45   |
| 345211  | 2   | 27   | 73   | 37  | 10   | 5   | 25   | 23  | 10  | 7   | 0    | 2    | 8    | 4    | 3    | 25   | 8    | 49   | 25   | 5    |
| 4476330 | 0   | 4    | 11   | 23  | 17   | 2   | 0    | 2   | 1   | 0   | 47   | 13   | 7    | 24   | 68   | 154  | 114  | 0    | 0    | 30   |
| 113417  | 80  | 20   | 79   | 64  | 13   | 8   | 23   | 7   | 11  | 28  | 0    | 2    | 1    | 3    | 2    | 2    | 6    | 2    | 5    | 1    |
| 174651  | 0   | 4    | 120  | 19  | 0    | 0   | 0    | 0   | 0   | 0   | 22   | 1    | 1    | 0    | 27   | 0    | 33   | 0    | 0    | 34   |
| 263366  | 0   | 5    | 9    | 7   | 1    | 26  | 1    | 0   | 0   | 0   | 5    | 1    | 1    | 5    | 14   | 2081 | 0    | 0    | 1    | 7    |
| 178068  | 14  | 1    | 0    | 13  | 11   | 4   | 0    | 0   | 0   | 0   | 2    | 1    | 0    | 1    | 3    | 14   | 5    | 52   | 35   | 1    |
| 273904  | 0   | 2    | 4    | 1   | 0    | 0   | 0    | 0   | 3   | 4   | 0    | 0    | 0    | 1    | 1    | 28   | 2    | 0    | 0    | 0    |
| 258559  | 3   | 1195 | 1893 | 127 | 0    | 0   | 0    | 0   | 0   | 0   | 52   | 93   | 1    | 29   | 12   | 0    | 13   | 0    | 0    | 0    |
| 2315700 | 0   | 62   | 258  | 408 | 43   | 39  | 1    | 27  | 78  | 0   | 8    | 11   | 13   | 5    | 17   | 96   | 153  | 1    | 0    | 32   |
| 4418586 | 9   | 327  | 590  | 318 | 0    | 0   | 0    | 0   | 0   | 0   | 0    | 0    | 157  | 93   | 617  | 2719 | 23   | 1    | 0    | 224  |
| 276629  | 5   | 7    | 8    | 16  | 9    | 16  | 5    | 44  | 6   | 28  | 19   | 0    | 8    | 11   | 8    | 10   | 1    | 0    | 4    | 1    |
| 4424327 | 1   | 109  | 992  | 469 | 5    | 37  | 10   | 71  | 290 | 243 | 542  | 1159 | 388  | 315  | 470  | 378  | 36   | 0    | 0    | 752  |
| 831301  | 0   | 1    | 61   | 27  | 58   | 1   | 1    | 19  | 38  | 1   | 1    | 3    | 1    | 2    | 82   | 586  | 95   | 1    | 0    | 13   |
| 190026  | 0   | 0    | 0    | 0   | 0    | 0   | 0    | 0   | 2   | 0   | 0    | 1    | 290  | 292  | 127  | 316  | 372  | 1    | 0    | 81   |
| 4476780 | 0   | 14   | 3    | 1   | 12   | 2   | 1    | 6   | 2   | 0   | 3    | 0    | 154  | 3    | 35   | 12   | 1    | 0    | 0    | 0    |
| 570367  | 4   | 66   | 42   | 77  | 33   | 2   | 4    | 12  | 19  | 3   | 5    | 2    | 2    | 2    | 4    | 5    | 23   | 15   | 6    | 1    |
| 210950  | 1   | 62   | 24   | 117 | 1    | 5   | 241  | 1   | 0   | 0   | 462  | 149  | 121  | 273  | 812  | 349  | 150  | 10   | 29   | 4    |
| 4366524 | 0   | 6    | 24   | 12  | 6    | 5   | 2    | 0   | 0   | 0   | 3    | 0    | 0    | 0    | 0    | 0    | 0    | 0    | 0    | 0    |
| 272192  | 0   | 0    | 0    | 1   | 1    | 20  | 1    | 44  | 86  | 49  | 12   | 15   | 9    | 14   | 61   | 9    | 15   | 1    | 0    | 2    |
| 136604  | 0   | 0    | 0    | 3   | 110  | 21  | 3    | 2   | 153 | 3   | 72   | 17   | 251  | 104  | 39   | 310  | 218  | 0    | 0    | 0    |
| 192316  | 133 | 126  | 163  | 239 | 155  | 75  | 44   | 0   | 0   | 1   | 407  | 76   | 93   | 219  | 473  | 385  | 106  | 244  | 378  | 300  |
| 2072645 | 31  | 1    | 3    | 6   | 1    | 0   | 3    | 19  | 0   | 1   | 0    | 1    | 30   | 0    | 1    | 0    | 0    | 0    | 1    | 0    |
| 181719  | 13  | 157  | 99   | 104 | 252  | 33  | 10   | 0   | 0   | 85  | 214  | 293  | 2335 | 169  | 235  | 429  | 61   | 0    | 0    | 363  |
| 292892  | 0   | 19   | 0    | 1   | 23   | 3   | 0    | 0   | 0   | 1   | 0    | 6    | 1    | 2    | 1    | 4    | 0    | 0    | 0    | 0    |
| 340600  | 0   | 3    | 0    | 0   | 0    | 0   | 0    | 0   | 0   | 0   | 49   | 12   | 14   | 19   | 4    | 0    | 0    | 0    | 0    | 1    |
| 261590  | 35  | 75   | 91   | 34  | 100  | 3   | 4    | 3   | 49  | 15  | 17   | 16   | 4    | 1    | 2    | 215  | 4    | 23   | 139  | 149  |
| 168984  | 0   | 54   | 75   | 144 | 0    | 3   | 0    | 0   | 0   | 0   | 10   | 7    | 3    | 12   | 5    | 3    | 1    | 0    | 0    | 0    |
| 1703712 | 12  | 119  | 79   | 68  | 179  | 1   | 2    | 0   | 1   | 9   | 11   | 17   | 129  | 7    | 15   | 61   | 2    | 1    | 1    | 59   |
| 264345  | 0   | 2    | 2    | 0   | 0    | 0   | 0    | 60  | 1   | 1   | 30   | 17   | 0    | 18   | 21   | 279  | 49   | 0    | 0    | 87   |
| 209845  | 2   | 27   | 192  | 728 | 10   | 80  | 7    | 0   | 0   | 5   | 0    | 0    | 12   | 12   | 5    | 56   | 1    | 0    | 0    | 0    |
| 198209  | 18  | 19   | 33   | 12  | 38   | 3   | 8    | 2   | 16  | 8   | 16   | 19   | 3    | 2    | 1    | 165  | 4    | 23   | 157  | 56   |
| 171532  | 1   | 0    | 2    | 4   | 0    | 0   | 0    | 0   | 0   | 0   | 4    | 75   | 46   | 13   | 36   | 230  | 123  | 0    | 0    | 0    |
| 299600  | 0   | 19   | 141  | 392 | 3    | 11  | 3    | 0   | 0   | 1   | 0    | 0    | 1    | 1    | 1    | 15   | 1    | 0    | 0    | 0    |
| 273967  | 0   | 1    | 3    | 1   | 4    | 5   | 249  | 0   | 0   | 0   | 0    | 0    | 49   | 22   | 20   | 9    | 14   | 0    | 0    | 29   |
| 4449984 | 0   | 5    | 3    | 12  | 6    | 8   | 1    | 0   | 0   | 2   | 0    | 17   | 1    | 15   | 44   | 112  | 110  | 0    | 0    | 16   |
| 325850  | 690 | 98   | 81   | 39  | 44   | 2   | 57   | 30  | 48  | 4   | 2    | 2    | 22   | 6    | 59   | 7    | 4    | 26   | 37   | 4    |
| 801260  | 1   | 47   | 23   | 29  | 7    | 831 | 1318 | 1   | 1   | 743 | 4    | 0    | 5    | 19   | 78   | 1    | 8    | 7    | 22   | 9    |
| 259631  | 0   | 2    | 169  | 16  | 89   | 12  | 1    | 0   | 0   | 0   | 2    | 9    | 3    | 0    | 0    | 261  | 88   | 0    | 0    | 122  |
| 278609  | 1   | 54   | 508  | 231 | 3077 | 93  | 564  | 72  | 111 | 112 | 26   | 90   | 28   | 15   | 35   | 32   | 33   | 7    | 8    | 83   |
| 264155  | 0   | 2    | 0    | 3   | 0    | 2   | 0    | 11  | 19  | 2   | 18   | 14   | 0    | 0    | 1    | 0    | 2    | 0    | 0    | 7    |
| 333576  | 0   | 15   | 3    | 24  | 1    | 0   | 0    | 0   | 3   | 0   | 0    | 0    | 0    | 3    | 1    | 0    | 18   | 0    | 0    | 0    |
| 194665  | 12  | 1    | 25   | 93  | 370  | 22  | 1    | 0   | 1   | 0   | 79   | 57   | 38   | 16   | 3    | 0    | 0    | 0    | 0    | 0    |
| 194662  | 0   | 1    | 0    | 6   | 5    | 2   | 0    | 2   | 1   | 0   | 0    | 0    | 1    | 0    | 0    | 0    | 0    | 0    | 0    | 0    |
| 2897332 | 0   | 22   | 22   | 32  | 83   | 25  | 3    | 65  | 152 | 13  | 12   | 15   | 12   | 6    | 17   | 140  | 78   | 77   | 37   | 71   |
| 178490  | 0   | 1    | 0    | 0   | 114  | 30  | 1    | 33  | 20  | 23  | 15   | 26   | 19   | 12   | 34   | 273  | 99   | 188  | 104  | 44   |
| 262801  | 5   | 104  | 10   | 35  | 0    | 29  | 3    | 0   | 0   | 0   | 202  | 8    | 4    | 324  | 139  | 0    | 0    | 1    | 0    | 83   |
| 4471130 | 0   | 14   | 12   | 9   | 3    | 7   | 1    | 0   | 3   | 309 | 3    | 2    | 3    | 0    | 2    | 6    | 88   | 0    | 2    | 224  |
| 4471135 | 0   | 9    | 30   | 16  | 0    | 1   | 0    | 0   | 0   | 0   | 5    | 14   | 0    | 0    | 0    | 1    | 0    | 0    | 0    | 0    |
| 259275  | 0   | 9    | 11   | 10  | 32   | 4   | 0    | 0   | 3   | 0   | 1    | 4    | 1    | 1    | 3    | 4    | 5    | 0    | 0    | 3    |

Table S3 E

| ID      | P    | P.1  | P.2  | P.3  | P.4  | P.5 | P.6  | P.7  | P.8  | P.9  | P.10 | P.11 | P.12 | P.13 | P.14 | P.15 | P.16 | P.17 | P.18 | P.19 |
|---------|------|------|------|------|------|-----|------|------|------|------|------|------|------|------|------|------|------|------|------|------|
| 198194  | 2    | 30   | 523  | 124  | 37   | 43  | 6    | 225  | 210  | 568  | 23   | 62   | 38   | 20   | 100  | 35   | 10   | 0    | 0    | 39   |
| 575261  | 4    | 16   | 4    | 16   | 8    | 0   | 0    | 0    | 17   | 0    | 0    | 1    | 2    | 4    | 1    | 3    | 11   | 4    | 0    | 0    |
| 258849  | 15   | 551  | 496  | 317  | 2    | 82  | 986  | 3    | 1    | 9    | 203  | 58   | 235  | 113  | 693  | 129  | 84   | 595  | 785  | 207  |
| 4045882 | 0    | 0    | 0    | 0    | 19   | 4   | 1048 | 30   | 76   | 246  | 0    | 0    | 53   | 0    | 24   | 0    | 0    | 913  | 878  | 14   |
| 177917  | 0    | 14   | 15   | 5    | 4    | 2   | 0    | 0    | 0    | 0    | 6    | 1    | 0    | 1    | 12   | 0    | 0    | 7    | 11   | 2    |
| 298973  | 0    | 12   | 26   | 53   | 12   | 1   | 92   | 2    | 19   | 1    | 3    | 4    | 0    | 1    | 2    | 2    | 5    | 3    | 6    | 0    |
| 835456  | 0    | 42   | 130  | 44   | 0    | 27  | 1    | 0    | 0    | 0    | 0    | 0    | 0    | 0    | 0    | 0    | 1    | 0    | 0    | 0    |
| 276663  | 0    | 14   | 69   | 29   | 102  | 3   | 0    | 4    | 7    | 11   | 2    | 0    | 1    | 0    | 0    | 3    | 2    | 4    | 0    | 2    |
| 3868285 | 3    | 1    | 36   | 27   | 1625 | 378 | 31   | 448  | 3    | 32   | 785  | 353  | 109  | 187  | 680  | 717  | 6    | 1    | 1    | 451  |
| 276484  | 0    | 1    | 7    | 15   | 0    | 11  | 10   | 194  | 348  | 16   | 0    | 0    | 0    | 0    | 0    | 0    | 0    | 0    | 0    | 0    |
| 192598  | 1    | 55   | 115  | 169  | 0    | 29  | 3    | 0    | 0    | 0    | 0    | 0    | 0    | 0    | 0    | 10   | 22   | 0    | 0    | 27   |
| 4343528 | 0    | 35   | 47   | 32   | 83   | 4   | 1    | 1    | 1    | 1    | 15   | 61   | 6    | 3    | 19   | 8    | 2    | 0    | 1    | 12   |
| 260233  | 0    | 47   | 46   | 93   | 6    | 3   | 0    | 0    | 0    | 0    | 0    | 1    | 0    | 1    | 1    | 3    | 10   | 1    | 0    | 0    |
| 174770  | 0    | 1    | 0    | 2    | 1    | 4   | 0    | 1    | 1    | 0    | 0    | 3    | 0    | 6    | 3    | 1    | 2    | 0    | 0    | 0    |
| 272953  | 0    | 1    | 3    | 16   | 20   | 15  | 5    | 16   | 29   | 1    | 4    | 33   | 26   | 9    | 9    | 6    | 10   | 0    | 0    | 40   |
| 176886  | 12   | 26   | 36   | 46   | 36   | 59  | 26   | 85   | 85   | 116  | 11   | 1    | 11   | 12   | 23   | 23   | 2    | 16   | 12   | 11   |
| 4466618 | 10   | 5    | 1    | 4    | 0    | 0   | 1    | 0    | 0    | 0    | 0    | 0    | 0    | 0    | 0    | 0    | 0    | 1    | 0    | 0    |
| 259870  | 0    | 0    | 0    | 0    | 0    | 0   | 0    | 0    | 0    | 1    | 5    | 58   | 10   | 4    | 1    | 1    | 0    | 320  | 229  | 40   |
| 4450025 | 0    | 1    | 7    | 1    | 79   | 0   | 0    | 4    | 5    | 1    | 4    | 20   | 2    | 0    | 2    | 13   | 0    | 0    | 0    | 1    |
| 661055  | 0    | 0    | 0    | 0    | 0    | 0   | 0    | 0    | 0    | 0    | 0    | 0    | 4    | 5    | 16   | 21   | 25   | 0    | 0    | 0    |
| 210292  | 5    | 143  | 388  | 537  | 212  | 167 | 14   | 146  | 599  | 18   | 228  | 800  | 129  | 235  | 209  | 273  | 482  | 2    | 0    | 295  |
| 166099  | 0    | 20   | 37   | 23   | 142  | 0   | 0    | 0    | 0    | 0    | 0    | 0    | 0    | 0    | 0    | 1    | 0    | 0    | 0    | 3    |
| 345582  | 0    | 3    | 3    | 1    | 23   | 3   | 0    | 0    | 0    | 0    | 0    | 0    | 0    | 0    | 1    | 0    | 0    | 0    | 0    | 0    |
| 261334  | 0    | 2    | 7    | 8    | 7    | 0   | 1    | 0    | 1    | 0    | 1    | 0    | 0    | 2    | 2    | 1    | 0    | 0    | 0    | 0    |
| 136783  | 0    | 28   | 7    | 9    | 0    | 3   | 0    | 2    | 0    | 5    | 0    | 0    | 0    | 1    | 1    | 0    | 0    | 2    | 0    | 0    |
| 314424  | 1    | 10   | 15   | 23   | 4    | 0   | 6    | 0    | 1    | 0    | 0    | 4    | 1    | 0    | 0    | 0    | 0    | 0    | 2    | 1    |
| 771140  | 0    | 0    | 0    | 0    | 0    | 35  | 14   | 0    | 1    | 0    | 52   | 23   | 297  | 98   | 117  | 2776 | 2    | 0    | 1    | 0    |
| 177930  | 1    | 0    | 0    | 0    | 7    | 1   | 2    | 1    | 1    | 0    | 2    | 0    | 0    | 2    | 0    | 10   | 5    | 1    | 15   | 1    |
| 274095  | 0    | 4    | 2    | 13   | 0    | 0   | 0    | 0    | 0    | 0    | 0    | 0    | 8    | 1    | 3    | 1    | 3    | 0    | 0    | 55   |
| 185519  | 0    | 3    | 3    | 5    | 3    | 1   | 1    | 0    | 0    | 0    | 1    | 2    | 1    | 1    | 15   | 7    | 0    | 0    | 0    | 22   |
| 162639  | 165  | 204  | 144  | 194  | 396  | 761 | 1260 | 1516 | 2022 | 1256 | 186  | 73   | 1035 | 126  | 552  | 92   | 35   | 44   | 72   | 72   |
| 578649  | 2    | 54   | 38   | 46   | 73   | 3   | 3    | 3    | 8    | 0    | 0    | 3    | 0    | 2    | 0    | 3    | 10   | 16   | 3    | 6    |
| 312311  | 3    | 67   | 79   | 101  | 63   | 3   | 22   | 11   | 16   | 11   | 10   | 41   | 4    | 8    | 9    | 4    | 4    | 31   | 18   | 44   |
| 569522  | 24   | 293  | 235  | 342  | 100  | 14  | 47   | 52   | 207  | 16   | 13   | 42   | 16   | 24   | 34   | 52   | 99   | 103  | 15   | 10   |
| 2212505 | 3167 | 1165 | 1688 | 2274 | 1142 | 55  | 615  | 2857 | 2288 | 6256 | 1527 | 181  | 2140 | 412  | 2726 | 809  | 693  | 909  | 945  | 145  |
| 214120  | 2    | 7    | 2    | 6    | 2    | 9   | 0    | 0    | 1    | 1    | 16   | 3    | 6    | 22   | 30   | 16   | 2    | 2    | 10   | 6    |
| 258411  | 0    | 9    | 2    | 6    | 32   | 2   | 0    | 1    | 0    | 0    | 1    | 1    | 2    | 1    | 1    | 5    | 3    | 0    | 0    | 0    |
| 4371295 | 5    | 5    | 14   | 63   | 5    | 3   | 549  | 20   | 86   | 4    | 42   | 155  | 35   | 5    | 56   | 69   | 338  | 150  | 565  | 31   |
| 2797565 | 0    | 132  | 126  | 123  | 87   | 10  | 2    | 0    | 0    | 0    | 14   | 14   | 28   | 2    | 0    | 0    | 0    | 0    | 0    | 9    |
| 1991255 | 0    | 9    | 5    | 17   | 8    | 0   | 0    | 0    | 0    | 0    | 5    | 17   | 1    | 1    | 0    | 3    | 2    | 0    | 0    | 3    |
| 261350  | 0    | 84   | 98   | 197  | 618  | 800 | 337  | 8    | 4    | 98   | 82   | 14   | 145  | 42   | 229  | 61   | 10   | 31   | 6    | 0    |
| 14035   | 6    | 24   | 92   | 14   | 1    | 21  | 2    | 8    | 236  | 7    | 3    | 26   | 10   | 5    | 3    | 0    | 0    | 0    | 0    | 0    |
| 264325  | 1    | 27   | 29   | 85   | 0    | 133 | 15   | 0    | 0    | 0    | 47   | 40   | 60   | 30   | 88   | 81   | 17   | 19   | 58   | 18   |
| 437137  | 755  | 498  | 1475 | 937  | 1702 | 367 | 846  | 2964 | 1337 | 3114 | 966  | 39   | 76   | 259  | 2376 | 679  | 167  | 635  | 1143 | 379  |
| 4481359 | 0    | 27   | 58   | 45   | 23   | 7   | 1    | 0    | 0    | 0    | 36   | 123  | 0    | 0    | 0    | 0    | 0    | 0    | 0    | 44   |
| 112720  | 1    | 23   | 6    | 35   | 5    | 10  | 1    | 1    | 1    | 0    | 0    | 0    | 5    | 0    | 3    | 30   | 9    | 9    | 25   | 11   |
| 311788  | 1843 | 184  | 516  | 291  | 331  | 48  | 95   | 266  | 256  | 680  | 187  | 44   | 77   | 102  | 95   | 205  | 40   | 51   | 209  | 53   |
| 833381  | 0    | 11   | 13   | 3    | 4    | 2   | 0    | 1    | 1    | 0    | 0    | 0    | 0    | 1    | 0    | 2    | 0    | 0    | 0    | 3    |
| 177952  | 4    | 27   | 48   | 286  | 167  | 458 | 407  | 82   | 264  | 139  | 190  | 706  | 428  | 429  | 247  | 104  | 54   | 107  | 220  | 86   |
| 4483264 | 0    | 8    | 12   | 16   | 22   | 4   | 0    | 0    | 1    | 0    | 5    | 10   | 1    | 4    | 2    | 10   | 0    | 0    | 0    | 18   |
| 310781  | 0    | 1    | 56   | 49   | 0    | 9   | 0    | 0    | 0    | 0    | 0    | 0    | 74   | 38   | 11   | 0    | 0    | 0    | 0    | 13   |
| 4477372 | 0    | 21   | 14   | 1    | 1    | 0   | 0    | 0    | 0    | 0    | 0    | 2    | 0    | 0    | 0    | 0    | 0    | 0    | 0    | 1    |

Table S3 E

| ID      | P    | P.1 | P.2  | P.3  | P.4 | P.5  | P.6 | P.7 | P.8 | P.9 | P.10 | P.11 | P.12 | P.13 | P.14 | P.15 | P.16 | P.17 | P.18 | P.19 |
|---------|------|-----|------|------|-----|------|-----|-----|-----|-----|------|------|------|------|------|------|------|------|------|------|
| 342685  | 0    | 35  | 30   | 114  | 0   | 17   | 1   | 0   | 0   | 0   | 0    | 0    | 73   | 89   | 37   | 0    | 0    | 0    | 0    | 24   |
| 4413888 | 27   | 0   | 111  | 35   | 0   | 0    | 0   | 0   | 0   | 0   | 0    | 0    | 0    | 0    | 0    | 1    | 1    | 0    | 0    | 2191 |
| 273091  | 7    | 28  | 9    | 28   | 1   | 6    | 1   | 1   | 4   | 0   | 4    | 33   | 0    | 0    | 1    | 1    | 29   | 0    | 0    | 0    |
| 324013  | 0    | 6   | 4    | 14   | 5   | 17   | 0   | 6   | 0   | 2   | 7    | 5    | 8    | 6    | 9    | 23   | 4    | 4    | 3    | 6    |
| 177371  | 391  | 4   | 113  | 333  | 256 | 74   | 6   | 0   | 0   | 0   | 55   | 1    | 12   | 12   | 32   | 61   | 23   | 159  | 223  | 6    |
| 4393892 | 0    | 21  | 8    | 16   | 0   | 3    | 4   | 0   | 0   | 1   | 8    | 49   | 1    | 8    | 6    | 1    | 0    | 0    | 0    | 6    |
| 4378477 | 1726 | 53  | 299  | 244  | 27  | 0    | 0   | 0   | 0   | 0   | 0    | 0    | 0    | 0    | 0    | 19   | 33   | 19   | 36   | 31   |
| 4327763 | 1    | 1   | 0    | 1    | 0   | 0    | 0   | 0   | 0   | 0   | 0    | 0    | 0    | 0    | 0    | 4    | 1    | 5    | 2    | 5    |
| 1902400 | 6    | 50  | 23   | 16   | 29  | 5    | 3   | 0   | 1   | 1   | 39   | 86   | 16   | 6    | 22   | 104  | 49   | 233  | 3698 | 192  |
| 181091  | 0    | 3   | 2    | 0    | 5   | 3    | 0   | 5   | 9   | 0   | 0    | 10   | 3    | 6    | 5    | 16   | 1    | 0    | 0    | 0    |
| 4384058 | 18   | 3   | 3    | 18   | 0   | 0    | 0   | 0   | 0   | 0   | 0    | 0    | 0    | 1    | 2    | 0    | 0    | 0    | 0    | 0    |
| 1112373 | 22   | 16  | 14   | 27   | 18  | 0    | 0   | 0   | 0   | 0   | 1    | 0    | 1    | 0    | 5    | 0    | 1    | 0    | 0    | 2    |
| 180879  | 3    | 58  | 226  | 119  | 254 | 45   | 4   | 0   | 0   | 217 | 34   | 46   | 72   | 16   | 347  | 538  | 117  | 2    | 0    | 92   |
| 356226  | 0    | 7   | 1    | 3    | 0   | 14   | 0   | 13  | 1   | 8   | 11   | 0    | 5    | 11   | 11   | 9    | 2    | 1    | 7    | 5    |
| 197706  | 0    | 4   | 4    | 6    | 7   | 3    | 0   | 13  | 15  | 2   | 24   | 49   | 17   | 7    | 5    | 8    | 15   | 0    | 0    | 40   |
| 264468  | 2    | 972 | 5267 | 4419 | 42  | 183  | 3   | 41  | 78  | 277 | 6    | 35   | 37   | 40   | 101  | 564  | 341  | 2    | 0    | 0    |
| 186549  | 1    | 12  | 6    | 12   | 3   | 2    | 3   | 0   | 0   | 3   | 1    | 2    | 0    | 1    | 1    | 2    | 4    | 0    | 0    | 1    |
| 185550  | 1490 | 98  | 309  | 291  | 14  | 497  | 25  | 0   | 0   | 3   | 960  | 117  | 220  | 609  | 1436 | 403  | 215  | 2    | 1    | 729  |
| 177748  | 1    | 4   | 2    | 1    | 3   | 1    | 0   | 0   | 0   | 0   | 0    | 8    | 3    | 5    | 4    | 6    | 0    | 0    | 0    | 1    |
| 189309  | 12   | 10  | 9    | 124  | 114 | 15   | 70  | 32  | 26  | 58  | 0    | 0    | 1    | 3    | 4    | 175  | 40   | 0    | 0    | 113  |
| 688800  | 1    | 28  | 58   | 125  | 0   | 3    | 1   | 0   | 0   | 0   | 0    | 0    | 0    | 0    | 0    | 1    | 0    | 0    | 0    | 0    |
| 3013444 | 0    | 183 | 168  | 184  | 676 | 239  | 20  | 0   | 0   | 13  | 156  | 696  | 1804 | 166  | 2444 | 58   | 108  | 263  | 422  | 49   |
| 174056  | 5    | 61  | 62   | 73   | 0   | 8    | 16  | 0   | 0   | 1   | 132  | 38   | 12   | 29   | 82   | 83   | 12   | 101  | 19   | 45   |
| 583266  | 1    | 8   | 3    | 2    | 37  | 0    | 0   | 7   | 0   | 0   | 2    | 1    | 0    | 1    | 0    | 2    | 0    | 0    | 1    | 0    |
| 180077  | 1351 | 8   | 315  | 1141 | 913 | 1135 | 81  | 0   | 1   | 5   | 1778 | 42   | 271  | 325  | 876  | 1286 | 632  | 4341 | 7827 | 76   |
| 813805  | 3    | 11  | 11   | 16   | 2   | 0    | 0   | 0   | 0   | 0   | 0    | 0    | 0    | 0    | 1    | 0    | 0    | 0    | 0    | 0    |
| 381666  | 250  | 42  | 218  | 142  | 102 | 213  | 736 | 0   | 3   | 33  | 9    | 61   | 2407 | 291  | 795  | 175  | 117  | 6    | 44   | 86   |
| 4449524 | 1    | 1   | 0    | 23   | 79  | 350  | 14  | 0   | 1   | 8   | 1    | 0    | 23   | 0    | 0    | 0    | 0    | 0    | 0    | 0    |
| 4441792 | 506  | 11  | 95   | 85   | 12  | 0    | 48  | 0   | 15  | 51  | 9    | 2    | 0    | 5    | 9    | 11   | 21   | 5    | 22   | 9    |
| 259006  | 0    | 2   | 0    | 0    | 1   | 0    | 0   | 0   | 0   | 0   | 0    | 0    | 0    | 0    | 0    | 776  | 369  | 0    | 0    | 0    |
| 190114  | 0    | 0   | 0    | 0    | 0   | 86   | 91  | 119 | 56  | 9   | 9    | 0    | 12   | 41   | 69   | 110  | 32   | 2    | 0    | 0    |
| 175227  | 0    | 0   | 13   | 0    | 0   | 6    | 0   | 0   | 0   | 0   | 2    | 1    | 0    | 0    | 1    | 15   | 0    | 0    | 0    | 28   |
| 4464787 | 1    | 0   | 0    | 2    | 64  | 273  | 16  | 1   | 0   | 132 | 421  | 1467 | 278  | 113  | 1125 | 0    | 0    | 0    | 0    | 0    |
| 4433554 | 20   | 44  | 64   | 29   | 0   | 188  | 15  | 0   | 0   | 2   | 0    | 0    | 1    | 0    | 1    | 0    | 0    | 0    | 0    | 0    |
| 228798  | 0    | 24  | 36   | 54   | 179 | 57   | 7   | 0   | 0   | 2   | 58   | 50   | 2    | 26   | 12   | 0    | 0    | 0    | 0    | 21   |
| 1109929 | 3    | 105 | 89   | 181  | 5   | 12   | 0   | 22  | 202 | 10  | 36   | 31   | 154  | 71   | 205  | 361  | 347  | 2    | 0    | 158  |
| 191098  | 1    | 28  | 27   | 102  | 10  | 1    | 0   | 0   | 0   | 0   | 0    | 0    | 18   | 16   | 7    | 69   | 24   | 0    | 0    | 114  |
| 196664  | 0    | 10  | 3    | 0    | 13  | 1    | 0   | 6   | 2   | 1   | 0    | 2    | 52   | 2    | 4    | 3    | 0    | 0    | 3    | 2    |
| 279026  | 1    | 21  | 88   | 36   | 161 | 7    | 1   | 2   | 15  | 7   | 1    | 0    | 0    | 0    | 3    | 34   | 15   | 27   | 1    | 46   |
| 179958  | 9    | 93  | 48   | 100  | 131 | 47   | 122 | 1   | 1   | 0   | 28   | 4    | 29   | 14   | 90   | 9    | 6    | 46   | 68   | 16   |
| 206324  | 0    | 8   | 1    | 10   | 11  | 12   | 0   | 23  | 1   | 0   | 22   | 2    | 1    | 6    | 8    | 9    | 1    | 0    | 4    | 6    |
| 174071  | 0    | 0   | 0    | 0    | 70  | 6    | 3   | 0   | 0   | 0   | 0    | 0    | 0    | 0    | 0    | 2    | 75   | 0    | 0    | 0    |
| 288128  | 2    | 8   | 32   | 33   | 6   | 2    | 2   | 2   | 1   | 0   | 1    | 2    | 0    | 1    | 1    | 2    | 1    | 0    | 0    | 0    |
| 4453609 | 1    | 17  | 0    | 19   | 5   | 23   | 47  | 7   | 2   | 0   | 4    | 1    | 29   | 11   | 39   | 15   | 6    | 22   | 32   | 9    |
| 356164  | 13   | 42  | 13   | 20   | 82  | 2    | 0   | 4   | 2   | 2   | 3    | 0    | 12   | 10   | 18   | 20   | 0    | 5    | 11   | 0    |
| 577170  | 2    | 15  | 11   | 1    | 58  | 11   | 6   | 8   | 4   | 1   | 0    | 4    | 15   | 2    | 25   | 2    | 0    | 2    | 8    | 0    |
| 185125  | 0    | 106 | 236  | 114  | 172 | 68   | 9   | 46  | 5   | 5   | 249  | 202  | 53   | 67   | 33   | 190  | 60   | 1    | 0    | 159  |
| 185126  | 5    | 588 | 659  | 164  | 115 | 4    | 0   | 4   | 1   | 11  | 6    | 1    | 57   | 6    | 35   | 13   | 116  | 0    | 0    | 0    |
| 130663  | 26   | 59  | 29   | 39   | 45  | 5    | 181 | 2   | 23  | 11  | 3    | 4    | 0    | 3    | 21   | 4    | 1    | 0    | 2    | 0    |
| 277200  | 0    | 39  | 23   | 79   | 37  | 19   | 5   | 0   | 0   | 1   | 146  | 552  | 30   | 55   | 141  | 70   | 192  | 0    | 0    | 137  |
| 4364243 | 4    | 6   | 7    | 9    | 16  | 0    | 0   | 0   | 1   | 0   | 23   | 21   | 0    | 0    | 0    | 0    | 0    | 0    | 0    | 9    |
| 182470  | 0    | 2   | 16   | 13   | 11  | 0    | 0   | 38  | 17  | 38  | 4    | 2    | 4    | 9    | 3    | 2    | 8    | 0    | 0    | 27   |

Table S3 E

| ID      | P    | P.1 | P.2 | P.3  | P.4 | P.5 | P.6 | P.7 | P.8 | P.9  | P.10 | P.11 | P.12 | P.13 | P.14 | P.15 | P.16 | P.17 | P.18 | P.19 |
|---------|------|-----|-----|------|-----|-----|-----|-----|-----|------|------|------|------|------|------|------|------|------|------|------|
| 166718  | 1    | 29  | 0   | 28   | 0   | 5   | 2   | 0   | 0   | 0    | 348  | 176  | 2    | 30   | 13   | 0    | 0    | 0    | 0    | 84   |
| 176008  | 0    | 3   | 1   | 5    | 7   | 1   | 0   | 0   | 1   | 0    | 0    | 1    | 0    | 1    | 0    | 1    | 1    | 0    | 0    | 0    |
| 1106101 | 0    | 0   | 0   | 66   | 0   | 0   | 155 | 0   | 0   | 6    | 0    | 1    | 0    | 6    | 8    | 0    | 0    | 31   | 43   | 0    |
| 584137  | 1    | 11  | 9   | 48   | 15  | 21  | 3   | 91  | 23  | 86   | 781  | 720  | 54   | 160  | 54   | 523  | 212  | 2    | 1    | 394  |
| 268384  | 1230 | 33  | 203 | 174  | 15  | 0   | 0   | 0   | 0   | 0    | 0    | 0    | 0    | 0    | 0    | 4    | 3    | 4    | 1    | 1    |
| 332608  | 3    | 17  | 142 | 76   | 41  | 38  | 64  | 1   | 4   | 222  | 35   | 54   | 39   | 1    | 19   | 91   | 32   | 1    | 0    | 5    |
| 303251  | 63   | 110 | 69  | 43   | 70  | 29  | 4   | 11  | 33  | 1    | 13   | 8    | 9    | 13   | 29   | 0    | 38   | 0    | 0    | 0    |
| 214919  | 21   | 521 | 341 | 1821 | 6   | 104 | 922 | 84  | 206 | 1075 | 91   | 50   | 161  | 57   | 141  | 1920 | 32   | 1    | 0    | 225  |
| 267388  | 0    | 79  | 29  | 26   | 0   | 0   | 2   | 0   | 0   | 0    | 1618 | 7577 | 1112 | 938  | 420  | 3806 | 21   | 1    | 0    | 803  |
| 187181  | 0    | 1   | 0   | 0    | 0   | 1   | 43  | 0   | 0   | 0    | 0    | 0    | 0    | 117  | 65   | 0    | 0    | 0    | 0    | 0    |
| 228556  | 12   | 125 | 59  | 229  | 12  | 0   | 0   | 0   | 0   | 0    | 0    | 1    | 1    | 4    | 11   | 0    | 0    | 0    | 0    | 0    |
| 129990  | 841  | 500 | 754 | 1609 | 0   | 500 | 35  | 1   | 0   | 1    | 2301 | 578  | 7    | 0    | 1    | 446  | 315  | 1010 | 2655 | 804  |
| 271572  | 0    | 5   | 2   | 4    | 19  | 0   | 0   | 0   | 2   | 0    | 0    | 3    | 0    | 0    | 0    | 1    | 1    | 0    | 0    | 1    |
| 3197419 | 0    | 9   | 5   | 13   | 1   | 0   | 2   | 5   | 7   | 1    | 11   | 65   | 1    | 16   | 12   | 10   | 18   | 67   | 29   | 15   |
| 187233  | 6    | 18  | 13  | 33   | 1   | 13  | 7   | 36  | 11  | 19   | 12   | 11   | 20   | 2    | 38   | 3    | 5    | 14   | 57   | 2    |
| 420168  | 0    | 0   | 9   | 1    | 4   | 0   | 2   | 0   | 0   | 0    | 0    | 0    | 0    | 0    | 0    | 0    | 0    | 0    | 0    | 0    |
| 189346  | 0    | 0   | 1   | 3    | 2   | 0   | 0   | 0   | 3   | 0    | 1    | 0    | 0    | 0    | 1    | 0    | 0    | 0    | 0    | 0    |
| 4472195 | 1    | 70  | 99  | 427  | 211 | 101 | 100 | 12  | 58  | 18   | 17   | 67   | 43   | 59   | 43   | 30   | 9    | 22   | 41   | 24   |
| 199137  | 0    | 3   | 5   | 11   | 11  | 3   | 0   | 0   | 0   | 0    | 4    | 6    | 2    | 10   | 17   | 0    | 2    | 0    | 0    | 10   |
| 264294  | 0    | 1   | 11  | 1    | 3   | 2   | 1   | 0   | 0   | 0    | 1    | 0    | 1    | 4    | 1    | 0    | 0    | 0    | 0    | 5    |
| 268844  | 0    | 0   | 1   | 0    | 19  | 0   | 0   | 1   | 0   | 0    | 0    | 0    | 0    | 1    | 1    | 36   | 3    | 0    | 0    | 2    |
| 179427  | 3    | 2   | 4   | 20   | 42  | 15  | 0   | 8   | 0   | 0    | 20   | 0    | 4    | 5    | 10   | 4    | 1    | 22   | 45   | 0    |
| 179426  | 8    | 20  | 5   | 24   | 21  | 1   | 0   | 1   | 10  | 0    | 1    | 6    | 1    | 1    | 3    | 1    | 0    | 0    | 0    | 4    |
| 331411  | 4    | 38  | 7   | 26   | 1   | 0   | 0   | 0   | 19  | 0    | 0    | 2    | 0    | 1    | 10   | 0    | 128  | 0    | 1    | 0    |
| 230268  | 0    | 1   | 11  | 2    | 0   | 42  | 3   | 1   | 0   | 0    | 9    | 3    | 1    | 0    | 1    | 0    | 0    | 0    | 0    | 3    |
| 271439  | 1    | 17  | 5   | 16   | 7   | 1   | 0   | 3   | 3   | 0    | 3    | 1    | 0    | 0    | 3    | 0    | 1    | 1    | 4    | 0    |
| 310760  | 0    | 25  | 27  | 32   | 28  | 0   | 5   | 3   | 2   | 3    | 3    | 8    | 1    | 0    | 1    | 3    | 2    | 6    | 5    | 14   |
| 170335  | 0    | 476 | 364 | 549  | 675 | 39  | 1   | 0   | 0   | 0    | 254  | 115  | 571  | 168  | 78   | 0    | 0    | 0    | 0    | 243  |
| 189476  | 0    | 194 | 56  | 131  | 13  | 27  | 3   | 31  | 38  | 0    | 5    | 15   | 8    | 28   | 15   | 17   | 26   | 17   | 34   | 7    |

Table S3 F. Taxonomy

| ID      | Taxonomy                                                                                                               |
|---------|------------------------------------------------------------------------------------------------------------------------|
| 181348  | k_Bacteria; p_Firmicutes; c_Clostridia; o_Clostridiales; f_Lachnospiraceae; g_Coprococcus; s__                         |
| 3957916 | k_Bacteria; p_Firmicutes; c_Clostridia; o_Clostridiales; f__; g__; s__                                                 |
| 244484  | k_Bacteria; p_Firmicutes; c_Clostridia; o_Clostridiales; f_Ruminococcaceae; g__; s__                                   |
| 1111328 | k_Bacteria; p_Firmicutes; c_Clostridia; o_Clostridiales; f__; g__; s__                                                 |
| 197452  | k_Bacteria; p_Firmicutes; c_Clostridia; o_Clostridiales; f__; g__; s__                                                 |
| 269815  | k_Bacteria; p_Firmicutes; c_Clostridia; o_Clostridiales; f__; g__; s__                                                 |
| 363383  | k_Bacteria; p_Proteobacteria; c_Gammaproteobacteria; o_Enterobacteriales; f_Enterobacteriaceae; g__; s__               |
| 175080  | k_Bacteria; p_Bacteroidetes; c_Bacteroidia; o_Bacteroidales; f_S24-7; g__; s__                                         |
| 179853  | k_Bacteria; p_Firmicutes; c_Clostridia; o_Clostridiales; f__; g__; s__                                                 |
| 183089  | k_Bacteria; p_Firmicutes; c_Clostridia; o_Clostridiales; f_Clostridiaceae; g__; s__                                    |
| 263171  | k_Bacteria; p_Firmicutes; c_Clostridia; o_Clostridiales; f__; g__; s__                                                 |
| 192222  | k_Bacteria; p_Bacteroidetes; c_Bacteroidia; o_Bacteroidales; f_Prevotellaceae; g__; s__                                |
| 276509  | k_Bacteria; p_Bacteroidetes; c_Bacteroidia; o_Bacteroidales; f_S24-7; g__; s__                                         |
| 423455  | k_Bacteria; p_Bacteroidetes; c_Bacteroidia; o_Bacteroidales; f_S24-7; g__; s__                                         |
| 267502  | k_Bacteria; p_Firmicutes; c_Clostridia; o_Clostridiales; f__; g__; s__                                                 |
| 172163  | k_Bacteria; p_Firmicutes; c_Clostridia; o_Clostridiales; f__; g__; s__                                                 |
| 828435  | k_Bacteria; p_Firmicutes; c_Erysipelotrichi; o_Erysipelotrichales; f_Erysipelotrichaceae; g__; s__                     |
| 289306  | k_Bacteria; p_Firmicutes; c_Clostridia; o_Clostridiales; f_Ruminococcaceae; g_Oscillospira; s__                        |
| 290253  | k_Bacteria; p_Firmicutes; c_Clostridia; o_Clostridiales; f_Ruminococcaceae; g_Oscillospira; s__                        |
| 216495  | k_Bacteria; p_Bacteroidetes; c_Bacteroidia; o_Bacteroidales; f_S24-7; g__; s__                                         |
| 4329450 | k_Bacteria; p_Firmicutes; c_Clostridia; o_Clostridiales; f_Lachnospiraceae; g__; s__                                   |
| 271418  | k_Bacteria; p_Bacteroidetes; c_Bacteroidia; o_Bacteroidales; f_S24-7; g__; s__                                         |
| 206817  | k_Bacteria; p_Bacteroidetes; c_Bacteroidia; o_Bacteroidales; f_S24-7; g__; s__                                         |
| 197891  | k_Bacteria; p_Bacteroidetes; c_Bacteroidia; o_Bacteroidales; f_S24-7; g__; s__                                         |
| 205134  | k_Bacteria; p_Bacteroidetes; c_Bacteroidia; o_Bacteroidales; f_S24-7; g__; s__                                         |
| 4352747 | k_Bacteria; p_Bacteroidetes; c_Bacteroidia; o_Bacteroidales; f_Bacteroidaceae; g_Bacteroides; s_ovatus                 |
| 182043  | k_Bacteria; p_Firmicutes; c_Clostridia; o_Clostridiales; f__; g__; s__                                                 |
| 274297  | k_Bacteria; p_Firmicutes; c_Clostridia; o_Clostridiales; f_Ruminococcaceae; g_Oscillospira; s__                        |
| 197782  | k_Bacteria; p_Firmicutes; c_Clostridia; o_Clostridiales; f_Ruminococcaceae; g__; s__                                   |
| 1105328 | k_Bacteria; p_Firmicutes; c_Clostridia; o_Clostridiales; f_Lachnospiraceae; g_Coprococcus; s__                         |
| 274438  | k_Bacteria; p_Firmicutes; c_Clostridia; o_Clostridiales; f__; g__; s__                                                 |
| 191948  | k_Bacteria; p_Firmicutes; c_Clostridia; o_Clostridiales; f__; g__; s__                                                 |
| 429917  | k_Bacteria; p_Bacteroidetes; c_Bacteroidia; o_Bacteroidales; f_S24-7; g__; s__                                         |
| 22659   | k_Bacteria; p_Proteobacteria; c_Gammaproteobacteria; o_Oceanospirillales; f_Halomonadaceae; g_Halomonas; s__           |
| 187272  | k_Bacteria; p_Firmicutes; c_Clostridia; o_Clostridiales; f_Ruminococcaceae; g__; s__                                   |
| 277388  | k_Bacteria; p_Firmicutes; c_Clostridia; o_Clostridiales; f_Ruminococcaceae; g_Oscillospira; s__                        |
| 318079  | k_Bacteria; p_Firmicutes; c_Clostridia; o_Clostridiales; f_Clostridiaceae; g__; s__                                    |
| 148056  | k_Bacteria; p_Proteobacteria; c_Gammaproteobacteria; o_Enterobacteriales; f_Enterobacteriaceae; g_Plesiomonas; s__     |
| 270385  | k_Bacteria; p_Firmicutes; c_Clostridia; o_Clostridiales; f_Ruminococcaceae; g_Oscillospira; s__                        |
| 270382  | k_Bacteria; p_Firmicutes; c_Clostridia; o_Clostridiales; f_Clostridiaceae; g__; s__                                    |
| 301233  | k_Bacteria; p_Firmicutes; c_Clostridia; o_Clostridiales; f_Lachnospiraceae; g__; s__                                   |
| 10518   | k_Bacteria; p_Proteobacteria; c_Deltaproteobacteria; o_Desulfovibrionales; f_Desulfovibrionaceae; g_Desulfovibrio; s__ |
| 827195  | k_Bacteria; p_Firmicutes; c_Clostridia; o_Clostridiales; f__; g__; s__                                                 |
| 10512   | k_Bacteria; p_Proteobacteria; c_Deltaproteobacteria; o_Desulfovibrionales; f_Desulfovibrionaceae; g_Desulfovibrio; s__ |

| ID      | Taxonomy                                                                                                    |
|---------|-------------------------------------------------------------------------------------------------------------|
| 338640  | k_Bacteria; p_Firmicutes; c_Clostridia; o_Clostridiales; f_Ruminococcaceae; g_Ruminococcus; s__             |
| 752584  | k_Bacteria; p_Proteobacteria; c_Gammaproteobacteria; o_Enterobacteriales; f_Enterobacteriaceae; g__; s__    |
| 198998  | k_Bacteria; p_Firmicutes; c_Clostridia; o_Clostridiales; f__; g__; s__                                      |
| 4357147 | k_Bacteria; p_Firmicutes; c_Clostridia; o_Clostridiales; f_Ruminococcaceae; g__; s__                        |
| 196122  | k_Bacteria; p_Firmicutes; c_Clostridia; o_Clostridiales; f__; g__; s__                                      |
| 839200  | k_Bacteria; p_Firmicutes; c_Clostridia; o_Clostridiales; f_Lachnospiraceae; g_Dorea; s__                    |
| 4483037 | k_Bacteria; p_Firmicutes; c_Clostridia; o_Clostridiales; f_Lachnospiraceae; g__; s__                        |
| 376862  | k_Bacteria; p_Firmicutes; c_Clostridia; o_Clostridiales; f_Clostridiaceae; g_Candidatus Arthromitus; s__    |
| 148671  | k_Bacteria; p_Firmicutes; c_Clostridia; o_Clostridiales; f__; g__; s__                                      |
| 194504  | k_Bacteria; p_Firmicutes; c_Clostridia; o_Clostridiales; f__; g__; s__                                      |
| 4442899 | k_Bacteria; p_Firmicutes; c_Clostridia; o_Clostridiales; f__; g__; s__                                      |
| 278712  | k_Bacteria; p_Bacteroidetes; c_Bacteroidia; o_Bacteroidales; f_S24-7; g__; s__                              |
| 4469233 | k_Bacteria; p_Firmicutes; c_Clostridia; o_Clostridiales; f__; g__; s__                                      |
| 184484  | k_Bacteria; p_Firmicutes; c_Clostridia; o_Clostridiales; f_Lachnospiraceae; g__; s__                        |
| 655793  | k_Bacteria; p_Firmicutes; c_Clostridia; o_Clostridiales; f_Ruminococcaceae; g_Oscillospira; s__             |
| 405780  | k_Bacteria; p_Firmicutes; c_Clostridia; o_Clostridiales; f_Ruminococcaceae; g_Ruminococcus; s__             |
| 174824  | k_Bacteria; p_Firmicutes; c_Clostridia; o_Clostridiales; f__; g__; s__                                      |
| 181193  | k_Bacteria; p_Firmicutes; c_Clostridia; o_Clostridiales; f_Lachnospiraceae; g__; s__                        |
| 3974550 | k_Bacteria; p_Proteobacteria; c_Gammaproteobacteria; o_Alteromonadales; f_Shewanellaceae; g_Shewanella; s__ |
| 173916  | k_Bacteria; p_Firmicutes; c_Clostridia; o_Clostridiales; f__; g__; s__                                      |
| 197623  | k_Bacteria; p_Bacteroidetes; c_Bacteroidia; o_Bacteroidales; f_S24-7; g__; s__                              |
| 628218  | k_Bacteria; p_Firmicutes; c_Clostridia; o_Clostridiales; f__; g__; s__                                      |
| 175706  | k_Bacteria; p_Bacteroidetes; c_Bacteroidia; o_Bacteroidales; f_S24-7; g__; s__                              |
| 183106  | k_Bacteria; p_Bacteroidetes; c_Bacteroidia; o_Bacteroidales; f_S24-7; g__; s__                              |
| 267958  | k_Bacteria; p_Firmicutes; c_Clostridia; o_Clostridiales; f__; g__; s__                                      |
| 189288  | k_Bacteria; p_Firmicutes; c_Clostridia; o_Clostridiales; f_Lachnospiraceae; g__; s__                        |
| 177621  | k_Bacteria; p_Firmicutes; c_Clostridia; o_Clostridiales; f_Lachnospiraceae; g__; s__                        |
| 829240  | k_Bacteria; p_Proteobacteria; c_Gammaproteobacteria; o_Aeromonadales; f_Aeromonadaceae; g__; s__            |
| 2645488 | k_Bacteria; p_Firmicutes; c_Erysipelotrichi; o_Erysipelotrichales; f_Erysipelotrichaceae; g__; s__          |
| 186886  | k_Bacteria; p_Firmicutes; c_Clostridia; o_Clostridiales; f_Ruminococcaceae; g__; s__                        |
| 210262  | k_Bacteria; p_Firmicutes; c_Clostridia; o_Clostridiales; f__; g__; s__                                      |
| 271822  | k_Bacteria; p_Firmicutes; c_Clostridia; o_Clostridiales; f__; g__; s__                                      |
| 196746  | k_Bacteria; p_Firmicutes; c_Clostridia; o_Clostridiales; f_Ruminococcaceae; g__; s__                        |
| 179343  | k_Bacteria; p_Bacteroidetes; c_Bacteroidia; o_Bacteroidales; f_S24-7; g__; s__                              |
| 4435934 | k_Bacteria; p_Firmicutes; c_Clostridia; o_Clostridiales; f__; g__; s__                                      |
| 746679  | k_Bacteria; p_Proteobacteria; c_Gammaproteobacteria; o_Enterobacteriales; f_Enterobacteriaceae; g__; s__    |
| 4481506 | k_Bacteria; p_Bacteroidetes; c_Bacteroidia; o_Bacteroidales; f_S24-7; g__; s__                              |
| 4357315 | k_Bacteria; p_Firmicutes; c_Clostridia; o_Clostridiales; f_Ruminococcaceae; g_Oscillospira; s__             |
| 452014  | k_Bacteria; p_Firmicutes; c_Clostridia; o_Clostridiales; f_Ruminococcaceae; g_Oscillospira; s__             |
| 68844   | k_Bacteria; p_Firmicutes; c_Clostridia; o_Clostridiales; f__; g__; s__                                      |
| 272593  | k_Bacteria; p_Firmicutes; c_Clostridia; o_Clostridiales; f_Lachnospiraceae; g_[Ruminococcus]; s_gnavus      |
| 182995  | k_Bacteria; p_Bacteroidetes; c_Bacteroidia; o_Bacteroidales; f_S24-7; g__; s__                              |
| 4383135 | k_Bacteria; p_Firmicutes; c_Clostridia; o_Clostridiales; f__; g__; s__                                      |
| 328143  | k_Bacteria; p_Bacteroidetes; c_Bacteroidia; o_Bacteroidales; f_S24-7; g__; s__                              |
| 185614  | k_Bacteria; p_Bacteroidetes; c_Bacteroidia; o_Bacteroidales; f_S24-7; g__; s__                              |



| ID      | Taxonomy                                                                                                                   |
|---------|----------------------------------------------------------------------------------------------------------------------------|
| 4378081 | k_Bacteria; p_Bacteroidetes; c_Bacteroidia; o_Bacteroidales; f_Bacteroidaceae; g_Bacteroides; s__                          |
| 162539  | k_Bacteria; p_Bacteroidetes; c_Bacteroidia; o_Bacteroidales; f_Rikenellaceae; g__ ; s__                                    |
| 4459184 | k_Bacteria; p_Firmicutes; c_Clostridia; o_Clostridiales; f__ ; g__ ; s__                                                   |
| 586453  | k_Bacteria; p_Firmicutes; c_Clostridia; o_Clostridiales; f_Christensenellaceae; g__ ; s__                                  |
| 827487  | k_Bacteria; p_Proteobacteria; c_Gammaproteobacteria; o_Aeromonadales; f_Aeromonadaceae; g__ ; s__                          |
| 184966  | k_Bacteria; p_Firmicutes; c_Clostridia; o_Clostridiales; f__ ; g__ ; s__                                                   |
| 209028  | k_Bacteria; p_Bacteroidetes; c_Bacteroidia; o_Bacteroidales; f_S24-7; g__ ; s__                                            |
| 197600  | k_Bacteria; p_Firmicutes; c_Clostridia; o_Clostridiales; f_Lachnospiraceae; g__ ; s__                                      |
| 4446120 | k_Bacteria; p_Firmicutes; c_Clostridia; o_Clostridiales; f_Ruminococcaceae; g_Oscillospira; s__                            |
| 356187  | k_Bacteria; p_Firmicutes; c_Clostridia; o_Clostridiales; f_Ruminococcaceae; g_Oscillospira; s__                            |
| 1108078 | k_Bacteria; p_Firmicutes; c_Clostridia; o_Clostridiales; f__ ; g__ ; s__                                                   |
| 1105589 | k_Bacteria; p_Bacteroidetes; c_Bacteroidia; o_Bacteroidales; f_S24-7; g__ ; s__                                            |
| 4342104 | k_Bacteria; p_Firmicutes; c_Clostridia; o_Clostridiales; f_Ruminococcaceae; g_Anaerotruncus; s__                           |
| 180476  | k_Bacteria; p_Firmicutes; c_Clostridia; o_Clostridiales; f__ ; g__ ; s__                                                   |
| 4335302 | k_Bacteria; p_Firmicutes; c_Clostridia; o_Clostridiales; f_Ruminococcaceae; g_Oscillospira; s__                            |
| 158302  | k_Bacteria; p_Firmicutes; c_Clostridia; o_Clostridiales; f__ ; g__ ; s__                                                   |
| 445144  | k_Bacteria; p_Bacteroidetes; c_Bacteroidia; o_Bacteroidales; f_S24-7; g__ ; s__                                            |
| 184753  | k_Bacteria; p_Bacteroidetes; c_Bacteroidia; o_Bacteroidales; f_Bacteroidaceae; g_Bacteroides; s__                          |
| 192712  | k_Bacteria; p_Bacteroidetes; c_Bacteroidia; o_Bacteroidales; f_S24-7; g__ ; s__                                            |
| 4414242 | k_Bacteria; p_Firmicutes; c_Clostridia; o_Clostridiales; f_Lachnospiraceae; g__ ; s__                                      |
| 255098  | k_Bacteria; p_Proteobacteria; c_Gammaproteobacteria; o_Oceanospirillales; f_Halomonadaceae; g__ ; s__                      |
| 173892  | k_Bacteria; p_Firmicutes; c_Clostridia; o_Clostridiales; f_Lachnospiraceae; g__ ; s__                                      |
| 4329776 | k_Bacteria; p_Firmicutes; c_Clostridia; o_Clostridiales; f_Lachnospiraceae; g_Coprococcus; s__                             |
| 4483585 | k_Bacteria; p_Firmicutes; c_Clostridia; o_Clostridiales; f__ ; g__ ; s__                                                   |
| 114111  | k_Bacteria; p_Proteobacteria; c_Alphaproteobacteria; o_RF32; f__ ; g__ ; s__                                               |
| 214715  | k_Bacteria; p_Bacteroidetes; c_Bacteroidia; o_Bacteroidales; f_S24-7; g__ ; s__                                            |
| 262159  | k_Bacteria; p_Firmicutes; c_Clostridia; o_Clostridiales; f__ ; g__ ; s__                                                   |
| 277364  | k_Bacteria; p_Bacteroidetes; c_Bacteroidia; o_Bacteroidales; f_S24-7; g__ ; s__                                            |
| 195433  | k_Bacteria; p_Firmicutes; c_Clostridia; o_Clostridiales; f__ ; g__ ; s__                                                   |
| 4449236 | k_Bacteria; p_Proteobacteria; c_Betaproteobacteria; o_Burkholderiales; f_Alcaligenaceae; g_Sutterella; s__                 |
| 269401  | k_Bacteria; p_Firmicutes; c_Clostridia; o_Clostridiales; f_Ruminococcaceae; g_Oscillospira; s__                            |
| 261177  | k_Bacteria; p_Bacteroidetes; c_Bacteroidia; o_Bacteroidales; f_S24-7; g__ ; s__                                            |
| 261178  | k_Bacteria; p_Firmicutes; c_Clostridia; o_Clostridiales; f_Lachnospiraceae; g__ ; s__                                      |
| 190673  | k_Bacteria; p_Bacteroidetes; c_Bacteroidia; o_Bacteroidales; f_S24-7; g__ ; s__                                            |
| 176836  | k_Bacteria; p_Firmicutes; c_Clostridia; o_Clostridiales; f_Ruminococcaceae; g_Oscillospira; s__                            |
| 188116  | k_Bacteria; p_Firmicutes; c_Clostridia; o_Clostridiales; f__ ; g__ ; s__                                                   |
| 234121  | k_Bacteria; p_Firmicutes; c_Clostridia; o_Clostridiales; f__ ; g__ ; s__                                                   |
| 144207  | k_Bacteria; p_Proteobacteria; c_Gammaproteobacteria; o_Oceanospirillales; f_Halomonadaceae; g_Haererehalobacter; s_salaria |
| 188786  | k_Bacteria; p_Firmicutes; c_Clostridia; o_Clostridiales; f__ ; g__ ; s__                                                   |
| 196856  | k_Bacteria; p_Firmicutes; c_Clostridia; o_Clostridiales; f__ ; g__ ; s__                                                   |
| 214116  | k_Bacteria; p_Firmicutes; c_Clostridia; o_Clostridiales; f__ ; g__ ; s__                                                   |
| 265047  | k_Bacteria; p_Firmicutes; c_Clostridia; o_Clostridiales; f_Lachnospiraceae; g__ ; s__                                      |
| 415491  | k_Bacteria; p_Firmicutes; c_Clostridia; o_Clostridiales; f__ ; g__ ; s__                                                   |
| 4390365 | k_Bacteria; p_Firmicutes; c_Erysipelotrichi; o_Erysipelotrichales; f_Erysipelotrichaceae; g__ ; s__                        |
| 174667  | k_Bacteria; p_Firmicutes; c_Clostridia; o_Clostridiales; f_Lachnospiraceae; g__ ; s__                                      |

| ID      | Taxonomy                                                                                                              |
|---------|-----------------------------------------------------------------------------------------------------------------------|
| 2901239 | k_Bacteria; p_Firmicutes; c_Clostridia; o_Clostridiales; f_Lachnospiraceae; g_[Ruminococcus]; s_gnavus                |
| 273687  | k_Bacteria; p_Firmicutes; c_Clostridia; o_Clostridiales; f_; g_; s_                                                   |
| 319165  | k_Bacteria; p_Firmicutes; c_Clostridia; o_Clostridiales; f_; g_; s_                                                   |
| 269426  | k_Bacteria; p_Firmicutes; c_Clostridia; o_Clostridiales; f_; g_; s_                                                   |
| 270303  | k_Bacteria; p_Firmicutes; c_Clostridia; o_Clostridiales; f_Ruminococcaceae; g_Oscillospira; s_                        |
| 329271  | k_Bacteria; p_Firmicutes; c_Clostridia; o_Clostridiales; f_; g_; s_                                                   |
| 198024  | k_Bacteria; p_Firmicutes; c_Clostridia; o_Clostridiales; f_; g_; s_                                                   |
| 896545  | k_Bacteria; p_Proteobacteria; c_Gammaproteobacteria; o_Pseudomonadales; f_Moraxellaceae; g_Acinetobacter; s_          |
| 263705  | k_Bacteria; p_Firmicutes; c_Clostridia; o_Clostridiales; f_Peptococcaceae; g_; s_                                     |
| 174418  | k_Bacteria; p_Firmicutes; c_Clostridia; o_Clostridiales; f_; g_; s_                                                   |
| 174417  | k_Bacteria; p_Firmicutes; c_Clostridia; o_Clostridiales; f_; g_; s_                                                   |
| 184329  | k_Bacteria; p_Bacteroidetes; c_Bacteroidia; o_Bacteroidales; f_S24-7; g_; s_                                          |
| 192342  | k_Bacteria; p_Proteobacteria; c_Gammaproteobacteria; o_Enterobacteriales; f_Enterobacteriaceae; g_; s_                |
| 4453773 | k_Bacteria; p_Proteobacteria; c_Deltaproteobacteria; o_Desulfovibrionales; f_Desulfovibrionaceae; g_Desulfovibrio; s_ |
| 372473  | k_Bacteria; p_Proteobacteria; c_Gammaproteobacteria; o_Enterobacteriales; f_Enterobacteriaceae; g_Erwinia; s_soli     |
| 199698  | k_Bacteria; p_Bacteroidetes; c_Bacteroidia; o_Bacteroidales; f_S24-7; g_; s_                                          |
| 191067  | k_Bacteria; p_Firmicutes; c_Clostridia; o_Clostridiales; f_; g_; s_                                                   |
| 453896  | k_Bacteria; p_Bacteroidetes; c_Bacteroidia; o_Bacteroidales; f_S24-7; g_; s_                                          |
| 179548  | k_Bacteria; p_Bacteroidetes; c_Bacteroidia; o_Bacteroidales; f_S24-7; g_; s_                                          |
| 179547  | k_Bacteria; p_Firmicutes; c_Clostridia; o_Clostridiales; f_Ruminococcaceae; g_Oscillospira; s_                        |
| 113978  | k_Bacteria; p_Proteobacteria; c_Deltaproteobacteria; o_Desulfovibrionales; f_Desulfovibrionaceae; g_Desulfovibrio; s_ |
| 3449666 | k_Bacteria; p_Cyanobacteria; c_4C0d-2; o_YS2; f_; g_; s_                                                              |
| 4468234 | k_Bacteria; p_Bacteroidetes; c_Bacteroidia; o_Bacteroidales; f_Bacteroidaceae; g_Bacteroides; s_                      |
| 4466275 | k_Bacteria; p_Firmicutes; c_Clostridia; o_Clostridiales; f_Ruminococcaceae; g_; s_                                    |
| 186742  | k_Bacteria; p_Firmicutes; c_Clostridia; o_Clostridiales; f_; g_; s_                                                   |
| 308332  | k_Bacteria; p_Firmicutes; c_Clostridia; o_Clostridiales; f_Lachnospiraceae; g_; s_                                    |
| 318819  | k_Bacteria; p_Firmicutes; c_Clostridia; o_Clostridiales; f_; g_; s_                                                   |
| 4379449 | k_Bacteria; p_Firmicutes; c_Erysipelotrichi; o_Erysipelotrichales; f_Erysipelotrichaceae; g_; s_                      |
| 105109  | k_Bacteria; p_Firmicutes; c_Clostridia; o_Clostridiales; f_; g_; s_                                                   |
| 261132  | k_Bacteria; p_Firmicutes; c_Clostridia; o_Clostridiales; f_Ruminococcaceae; g_; s_                                    |
| 808794  | k_Bacteria; p_Firmicutes; c_Clostridia; o_Clostridiales; f_Lachnospiraceae; g_; s_                                    |
| 407393  | k_Bacteria; p_Bacteroidetes; c_Bacteroidia; o_Bacteroidales; f_S24-7; g_; s_                                          |
| 267406  | k_Bacteria; p_Firmicutes; c_Clostridia; o_Clostridiales; f_Lachnospiraceae; g_; s_                                    |
| 672655  | k_Bacteria; p_Bacteroidetes; c_Bacteroidia; o_Bacteroidales; f_S24-7; g_; s_                                          |
| 260989  | k_Bacteria; p_Firmicutes; c_Clostridia; o_Clostridiales; f_; g_; s_                                                   |
| 2877100 | k_Bacteria; p_Firmicutes; c_Clostridia; o_Clostridiales; f_Ruminococcaceae; g_; s_                                    |
| 305787  | k_Bacteria; p_Firmicutes; c_Clostridia; o_Clostridiales; f_; g_; s_                                                   |
| 302641  | k_Bacteria; p_Firmicutes; c_Clostridia; o_Clostridiales; f_Ruminococcaceae; g_Oscillospira; s_                        |
| 1992    | k_Bacteria; p_Bacteroidetes; c_Bacteroidia; o_Bacteroidales; f_Bacteroidaceae; g_Bacteroides; s_                      |
| 353073  | k_Bacteria; p_Bacteroidetes; c_Bacteroidia; o_Bacteroidales; f_S24-7; g_; s_                                          |
| 134762  | k_Bacteria; p_Bacteroidetes; c_Bacteroidia; o_Bacteroidales; f_S24-7; g_; s_                                          |
| 175646  | k_Bacteria; p_Bacteroidetes; c_Bacteroidia; o_Bacteroidales; f_S24-7; g_; s_                                          |
| 263518  | k_Bacteria; p_Proteobacteria; c_Deltaproteobacteria; o_Desulfovibrionales; f_Desulfovibrionaceae; g_; s_              |
| 2137001 | k_Bacteria; p_Bacteroidetes; c_Bacteroidia; o_Bacteroidales; f_Bacteroidaceae; g_Bacteroides; s_                      |
| 3231096 | k_Bacteria; p_Bacteroidetes; c_Bacteroidia; o_Bacteroidales; f_S24-7; g_; s_                                          |

| ID      | Taxonomy                                                                                                                   |
|---------|----------------------------------------------------------------------------------------------------------------------------|
| 176444  | k_Bacteria; p_Bacteroidetes; c_Bacteroidia; o_Bacteroidales; f_S24-7; g_; s__                                              |
| 261114  | k_Bacteria; p_Firmicutes; c_Clostridia; o_Clostridiales; f_Lachnospiraceae; g_; s__                                        |
| 191216  | k_Bacteria; p_Firmicutes; c_Clostridia; o_Clostridiales; f_Ruminococcaceae; g_; s__                                        |
| 191218  | k_Bacteria; p_Firmicutes; c_Clostridia; o_Clostridiales; f_Clostridiaceae; g_; s__                                         |
| 167509  | k_Bacteria; p_Firmicutes; c_Clostridia; o_Clostridiales; f_Ruminococcaceae; g_Oscillospira; s__                            |
| 175416  | k_Bacteria; p_Firmicutes; c_Clostridia; o_Clostridiales; f_; g_; s__                                                       |
| 183829  | k_Bacteria; p_Firmicutes; c_Clostridia; o_Clostridiales; f_Ruminococcaceae; g_; s__                                        |
| 4462541 | k_Bacteria; p_Firmicutes; c_Clostridia; o_Clostridiales; f_; g_; s__                                                       |
| 2154095 | k_Bacteria; p_Firmicutes; c_Clostridia; o_Clostridiales; f_; g_; s__                                                       |
| 4416434 | k_Bacteria; p_Firmicutes; c_Clostridia; o_Clostridiales; f_; g_; s__                                                       |
| 440840  | k_Bacteria; p_Firmicutes; c_Clostridia; o_Clostridiales; f_; g_; s__                                                       |
| 40798   | k_Bacteria; p_Firmicutes; c_Clostridia; o_Clostridiales; f_Ruminococcaceae; g_; s__                                        |
| 229452  | k_Bacteria; p_Firmicutes; c_Clostridia; o_Clostridiales; f_; g_; s__                                                       |
| 229455  | k_Bacteria; p_Firmicutes; c_Clostridia; o_Clostridiales; f_Ruminococcaceae; g_Ruminococcus; s__                            |
| 178480  | k_Bacteria; p_Firmicutes; c_Clostridia; o_Clostridiales; f_Ruminococcaceae; g_Ruminococcus; s__                            |
| 4454025 | k_Bacteria; p_Firmicutes; c_Clostridia; o_Clostridiales; f_Lachnospiraceae; g_; s__                                        |
| 4470092 | k_Bacteria; p_Firmicutes; c_Clostridia; o_Clostridiales; f_Lachnospiraceae; g_; s__                                        |
| 259846  | k_Bacteria; p_Firmicutes; c_Clostridia; o_Clostridiales; f_; g_; s__                                                       |
| 177068  | k_Bacteria; p_Firmicutes; c_Clostridia; o_Clostridiales; f_; g_; s__                                                       |
| 97263   | k_Bacteria; p_Firmicutes; c_Clostridia; o_Clostridiales; f_Ruminococcaceae; g_; s__                                        |
| 197099  | k_Bacteria; p_Firmicutes; c_Clostridia; o_Clostridiales; f_Ruminococcaceae; g_Oscillospira; s__                            |
| 265976  | k_Bacteria; p_Firmicutes; c_Clostridia; o_Clostridiales; f_Lachnospiraceae; g_; s__                                        |
| 324999  | k_Bacteria; p_Firmicutes; c_Clostridia; o_Clostridiales; f_; g_; s__                                                       |
| 262677  | k_Bacteria; p_Firmicutes; c_Clostridia; o_Clostridiales; f_Ruminococcaceae; g_Oscillospira; s__                            |
| 647320  | k_Bacteria; p_Firmicutes; c_Clostridia; o_Clostridiales; f_; g_; s__                                                       |
| 174573  | k_Bacteria; p_Bacteroidetes; c_Bacteroidia; o_Bacteroidales; f_S24-7; g_; s__                                              |
| 174571  | k_Bacteria; p_Firmicutes; c_Clostridia; o_Clostridiales; f_; g_; s__                                                       |
| 1571092 | k_Bacteria; p_Firmicutes; c_Clostridia; o_Clostridiales; f_; g_; s__                                                       |
| 177271  | k_Bacteria; p_Firmicutes; c_Clostridia; o_Clostridiales; f_Ruminococcaceae; g_Ruminococcus; s__                            |
| 4207913 | k_Bacteria; p_Bacteroidetes; c_Bacteroidia; o_Bacteroidales; f_Rikenellaceae; g_; s__                                      |
| 1112121 | k_Bacteria; p_Firmicutes; c_Clostridia; o_Clostridiales; f_; g_; s__                                                       |
| 4334624 | k_Bacteria; p_Firmicutes; c_Clostridia; o_Clostridiales; f_Lachnospiraceae; g_; s__                                        |
| 390896  | k_Bacteria; p_Bacteroidetes; c_Bacteroidia; o_Bacteroidales; f_S24-7; g_; s__                                              |
| 129394  | k_Bacteria; p_Firmicutes; c_Clostridia; o_Clostridiales; f_; g_; s__                                                       |
| 2897325 | k_Bacteria; p_Proteobacteria; c_Deltaproteobacteria; o_Desulfovibrionales; f_Desulfovibrionaceae; g_Bilophila; s__         |
| 786708  | k_Bacteria; p_Proteobacteria; c_Gammaproteobacteria; o_Enterobacteriales; f_Enterobacteriaceae; g_; s__                    |
| 180235  | k_Bacteria; p_Firmicutes; c_Clostridia; o_Clostridiales; f_Ruminococcaceae; g_Oscillospira; s__                            |
| 185036  | k_Bacteria; p_Bacteroidetes; c_Bacteroidia; o_Bacteroidales; f_S24-7; g_; s__                                              |
| 130335  | k_Bacteria; p_Firmicutes; c_Clostridia; o_Clostridiales; f_; g_; s__                                                       |
| 259249  | k_Bacteria; p_Bacteroidetes; c_Bacteroidia; o_Bacteroidales; f_S24-7; g_; s__                                              |
| 98048   | k_Bacteria; p_Firmicutes; c_Clostridia; o_Clostridiales; f_Ruminococcaceae; g_Oscillospira; s__                            |
| 261892  | k_Bacteria; p_Firmicutes; c_Erysipelotrichi; o_Erysipelotrichales; f_Erysipelotrichaceae; g_Allobaculum; s__               |
| 1594231 | k_Bacteria; p_Firmicutes; c_Clostridia; o_Clostridiales; f_; g_; s__                                                       |
| 4374042 | k_Bacteria; p_Deferribacteres; c_Deferribacteres; o_Deferribacterales; f_Deferribacteraceae; g_Mucispirillum; s_schaedleri |
| 204111  | k_Bacteria; p_Bacteroidetes; c_Bacteroidia; o_Bacteroidales; f_S24-7; g_; s__                                              |

| ID      | Taxonomy                                                                                                               |
|---------|------------------------------------------------------------------------------------------------------------------------|
| 274380  | k_Bacteria; p_Firmicutes; c_Clostridia; o_Clostridiales; f__; g__; s__                                                 |
| 176957  | k_Bacteria; p_Firmicutes; c_Clostridia; o_Clostridiales; f__; g__; s__                                                 |
| 198238  | k_Bacteria; p_Firmicutes; c_Clostridia; o_Clostridiales; f_Lachnospiraceae; g__; s__                                   |
| 1110253 | k_Bacteria; p_Firmicutes; c_Clostridia; o_Clostridiales; f_Ruminococcaceae; g__; s__                                   |
| 171079  | k_Bacteria; p_Firmicutes; c_Clostridia; o_Clostridiales; f_Ruminococcaceae; g_Ruminococcus; s__                        |
| 174004  | k_Bacteria; p_Bacteroidetes; c_Bacteroidia; o_Bacteroidales; f_S24-7; g__; s__                                         |
| 182712  | k_Bacteria; p_Firmicutes; c_Clostridia; o_Clostridiales; f__; g__; s__                                                 |
| 4417539 | k_Bacteria; p_Firmicutes; c_Clostridia; o_Clostridiales; f_Ruminococcaceae; g_Ruminococcus; s__                        |
| 1107303 | k_Bacteria; p_Firmicutes; c_Clostridia; o_Clostridiales; f__; g__; s__                                                 |
| 310407  | k_Bacteria; p_Firmicutes; c_Clostridia; o_Clostridiales; f__; g__; s__                                                 |
| 201374  | k_Bacteria; p_Proteobacteria; c_Gammaproteobacteria; o_Oceanospirillales; f_Halomonadaceae; g_Halomonas; s__           |
| 261409  | k_Bacteria; p_Firmicutes; c_Clostridia; o_Clostridiales; f_Lachnospiraceae; g__; s__                                   |
| 320972  | k_Bacteria; p_Firmicutes; c_Clostridia; o_Clostridiales; f_Ruminococcaceae; g__; s__                                   |
| 196974  | k_Bacteria; p_Firmicutes; c_Clostridia; o_Clostridiales; f__; g__; s__                                                 |
| 345362  | k_Bacteria; p_Proteobacteria; c_Gammaproteobacteria; o_Enterobacteriales; f_Enterobacteriaceae; g__; s__               |
| 134065  | k_Bacteria; p_Firmicutes; c_Clostridia; o_Clostridiales; f_Lachnospiraceae; g__; s__                                   |
| 191616  | k_Bacteria; p_Firmicutes; c_Clostridia; o_Clostridiales; f_Ruminococcaceae; g__; s__                                   |
| 460953  | k_Bacteria; p_Bacteroidetes; c_Bacteroidia; o_Bacteroidales; f_S24-7; g__; s__                                         |
| 174768  | k_Bacteria; p_Firmicutes; c_Clostridia; o_Clostridiales; f__; g__; s__                                                 |
| 312322  | k_Bacteria; p_Bacteroidetes; c_Bacteroidia; o_Bacteroidales; f_S24-7; g__; s__                                         |
| 724472  | k_Bacteria; p_Firmicutes; c_Clostridia; o_Clostridiales; f_Lachnospiraceae; g_Dorea; s__                               |
| 207749  | k_Bacteria; p_Bacteroidetes; c_Bacteroidia; o_Bacteroidales; f_S24-7; g__; s__                                         |
| 189730  | k_Bacteria; p_Bacteroidetes; c_Bacteroidia; o_Bacteroidales; f_S24-7; g__; s__                                         |
| 187841  | k_Bacteria; p_Bacteroidetes; c_Bacteroidia; o_Bacteroidales; f_Bacteroidaceae; g_Bacteroides; s__                      |
| 186073  | k_Bacteria; p_Firmicutes; c_Clostridia; o_Clostridiales; f_Ruminococcaceae; g__; s__                                   |
| 1087825 | k_Bacteria; p_Firmicutes; c_Clostridia; o_Clostridiales; f_Lachnospiraceae; g__; s__                                   |
| 47477   | k_Bacteria; p_Firmicutes; c_Clostridia; o_Clostridiales; f_Lachnospiraceae; g__; s__                                   |
| 4296701 | k_Bacteria; p_Firmicutes; c_Clostridia; o_Clostridiales; f_Ruminococcaceae; g_Oscillospira; s__                        |
| 169428  | k_Bacteria; p_Firmicutes; c_Bacilli; o_Lactobacillales; f_Lactobacillaceae; g_Lactobacillus; s__                       |
| 306469  | k_Bacteria; p_Firmicutes; c_Clostridia; o_Clostridiales; f__; g__; s__                                                 |
| 833390  | k_Bacteria; p_Firmicutes; c_Clostridia; o_Clostridiales; f_Lachnospiraceae; g__; s__                                   |
| 315147  | k_Bacteria; p_Bacteroidetes; c_Bacteroidia; o_Bacteroidales; f_S24-7; g__; s__                                         |
| 342962  | k_Bacteria; p_Bacteroidetes; c_Bacteroidia; o_Bacteroidales; f_S24-7; g__; s__                                         |
| 929476  | k_Bacteria; p_Proteobacteria; c_Gammaproteobacteria; o_Enterobacteriales; f_Enterobacteriaceae; g__; s__               |
| 635059  | k_Bacteria; p_Firmicutes; c_Clostridia; o_Clostridiales; f__; g__; s__                                                 |
| 228310  | k_Bacteria; p_Tenericutes; c_Mollicutes; o_Anaeroplasmatales; f_Anaeroplasmataceae; g_Anaeroplasma; s__                |
| 172705  | k_Bacteria; p_Firmicutes; c_Clostridia; o_Clostridiales; f__; g__; s__                                                 |
| 185177  | k_Bacteria; p_Firmicutes; c_Clostridia; o_Clostridiales; f__; g__; s__                                                 |
| 413996  | k_Bacteria; p_Bacteroidetes; c_Bacteroidia; o_Bacteroidales; f_S24-7; g__; s__                                         |
| 1106683 | k_Bacteria; p_Firmicutes; c_Clostridia; o_Clostridiales; f__; g__; s__                                                 |
| 4314257 | k_Bacteria; p_Firmicutes; c_Clostridia; o_Clostridiales; f_Ruminococcaceae; g_Oscillospira; s__                        |
| 271013  | k_Bacteria; p_Firmicutes; c_Clostridia; o_Clostridiales; f__; g__; s__                                                 |
| 264101  | k_Bacteria; p_Firmicutes; c_Clostridia; o_Clostridiales; f_Ruminococcaceae; g_Oscillospira; s__                        |
| 4402042 | k_Bacteria; p_Firmicutes; c_Clostridia; o_Clostridiales; f__; g__; s__                                                 |
| 72820   | k_Bacteria; p_Actinobacteria; c_Actinobacteria; o_Bifidobacteriales; f_Bifidobacteriaceae; g_Bifidobacterium; s_longum |

| ID      | Taxonomy                                                                                                                     |
|---------|------------------------------------------------------------------------------------------------------------------------------|
| 194944  | k_Bacteria; p_Firmicutes; c_Clostridia; o_Clostridiales; f__; g__; s__                                                       |
| 166535  | k_Bacteria; p_Bacteroidetes; c_Bacteroidia; o_Bacteroidales; f_S24-7; g__; s__                                               |
| 247557  | k_Bacteria; p_Firmicutes; c_Clostridia; o_Clostridiales; f_Ruminococcaceae; g_Oscillospira; s__                              |
| 1871    | k_Bacteria; p_Deferribacteres; c_Deferribacteres; o_Deferribacterales; f_Deferribacteraceae; g_Mucispirillum; s_schaedleri   |
| 350666  | k_Bacteria; p_Firmicutes; c_Clostridia; o_Clostridiales; f__; g__; s__                                                       |
| 190242  | k_Bacteria; p_Firmicutes; c_Clostridia; o_Clostridiales; f_Ruminococcaceae; g_Ruminococcus; s__                              |
| 100344  | k_Bacteria; p_Proteobacteria; c_Epsilonproteobacteria; o_Campylobacteriales; f_Helicobacteraceae; g__; s__                   |
| 186338  | k_Bacteria; p_Bacteroidetes; c_Bacteroidia; o_Bacteroidales; f_S24-7; g__; s__                                               |
| 542096  | k_Bacteria; p_Firmicutes; c_Clostridia; o_Clostridiales; f_Lachnospiraceae; g__; s__                                         |
| 619224  | k_Bacteria; p_Firmicutes; c_Bacilli; o_Lactobacillales; f_Lactobacillaceae; g_Lactobacillus; s__                             |
| 179695  | k_Bacteria; p_Firmicutes; c_Clostridia; o_Clostridiales; f_Lachnospiraceae; g_Coproccoccus; s__                              |
| 263664  | k_Bacteria; p_Bacteroidetes; c_Bacteroidia; o_Bacteroidales; f_S24-7; g__; s__                                               |
| 265992  | k_Bacteria; p_Firmicutes; c_Clostridia; o_Clostridiales; f_Lachnospiraceae; g__; s__                                         |
| 184209  | k_Bacteria; p_Bacteroidetes; c_Bacteroidia; o_Bacteroidales; f_Bacteroidaceae; g_Bacteroides; s__                            |
| 261992  | k_Bacteria; p_Firmicutes; c_Clostridia; o_Clostridiales; f__; g__; s__                                                       |
| 299858  | k_Bacteria; p_Firmicutes; c_Clostridia; o_Clostridiales; f_Lachnospiraceae; g__; s__                                         |
| 259699  | k_Bacteria; p_Firmicutes; c_Clostridia; o_Clostridiales; f_Ruminococcaceae; g__; s__                                         |
| 193723  | k_Bacteria; p_Bacteroidetes; c_Bacteroidia; o_Bacteroidales; f_S24-7; g__; s__                                               |
| 204144  | k_Bacteria; p_Bacteroidetes; c_Bacteroidia; o_Bacteroidales; f_S24-7; g__; s__                                               |
| 199403  | k_Bacteria; p_Actinobacteria; c_Coriobacteriia; o_Coriobacteriales; f_Coriobacteriaceae; g_Adlercreutzia; s__                |
| 1106468 | k_Bacteria; p_Bacteroidetes; c_Bacteroidia; o_Bacteroidales; f_S24-7; g__; s__                                               |
| 176760  | k_Bacteria; p_Bacteroidetes; c_Bacteroidia; o_Bacteroidales; f_S24-7; g__; s__                                               |
| 827592  | k_Bacteria; p_Firmicutes; c_Clostridia; o_Clostridiales; f_Ruminococcaceae; g_Ruminococcus; s__                              |
| 416043  | k_Bacteria; p_Bacteroidetes; c_Bacteroidia; o_Bacteroidales; f_S24-7; g__; s__                                               |
| 258641  | k_Bacteria; p_Firmicutes; c_Clostridia; o_Clostridiales; f_Lachnospiraceae; g__; s__                                         |
| 36647   | k_Bacteria; p_Firmicutes; c_Clostridia; o_Clostridiales; f__; g__; s__                                                       |
| 258423  | k_Bacteria; p_Firmicutes; c_Clostridia; o_Clostridiales; f__; g__; s__                                                       |
| 258421  | k_Bacteria; p_Firmicutes; c_Erysipelotrichi; o_Erysipelotrichales; f_Erysipelotrichaceae; g_Allobaculum; s__                 |
| 186555  | k_Bacteria; p_Firmicutes; c_Clostridia; o_Clostridiales; f__; g__; s__                                                       |
| 306699  | k_Bacteria; p_Firmicutes; c_Clostridia; o_Clostridiales; f_Ruminococcaceae; g_Oscillospira; s__                              |
| 335267  | k_Bacteria; p_Firmicutes; c_Clostridia; o_Clostridiales; f__; g__; s__                                                       |
| 771177  | k_Bacteria; p_Firmicutes; c_Clostridia; o_Clostridiales; f__; g__; s__                                                       |
| 204171  | k_Bacteria; p_Bacteroidetes; c_Bacteroidia; o_Bacteroidales; f_S24-7; g__; s__                                               |
| 299267  | k_Bacteria; p_Proteobacteria; c_Gammaproteobacteria; o_Enterobacteriales; f_Enterobacteriaceae; g__; s__                     |
| 264802  | k_Bacteria; p_Firmicutes; c_Clostridia; o_Clostridiales; f__; g__; s__                                                       |
| 4296218 | k_Bacteria; p_Firmicutes; c_Clostridia; o_Clostridiales; f_Ruminococcaceae; g_Oscillospira; s__                              |
| 162005  | k_Bacteria; p_Firmicutes; c_Clostridia; o_Clostridiales; f_Ruminococcaceae; g_Oscillospira; s__                              |
| 176242  | k_Bacteria; p_Firmicutes; c_Clostridia; o_Clostridiales; f__; g__; s__                                                       |
| 310751  | k_Bacteria; p_Firmicutes; c_Clostridia; o_Clostridiales; f__; g__; s__                                                       |
| 813217  | k_Bacteria; p_Proteobacteria; c_Gammaproteobacteria; o_Enterobacteriales; f_Enterobacteriaceae; g_Klebsiella; s__            |
| 165430  | k_Bacteria; p_Firmicutes; c_Clostridia; o_Clostridiales; f_Lachnospiraceae; g__; s__                                         |
| 522371  | k_Bacteria; p_Bacteroidetes; c_Bacteroidia; o_Bacteroidales; f_Rikenellaceae; g__; s__                                       |
| 593043  | k_Bacteria; p_Verrucomicrobia; c_Verrucomicrobiae; o_Verrucomicrobiales; f_Verrucomicrobiaceae; g_Akkermansia; s_muciniphila |
| 304047  | k_Bacteria; p_Bacteroidetes; c_Bacteroidia; o_Bacteroidales; f_Bacteroidaceae; g_Bacteroides; s_acidifaciens                 |
| 2084364 | k_Bacteria; p_Proteobacteria; c_Gammaproteobacteria; o_Enterobacteriales; f_Enterobacteriaceae; g__; s__                     |

| ID      | Taxonomy                                                                                                                     |
|---------|------------------------------------------------------------------------------------------------------------------------------|
| 313724  | k_Bacteria; p_Firmicutes; c_Clostridia; o_Clostridiales; f__; g__; s__                                                       |
| 2937207 | k_Bacteria; p_Deferribacteres; c_Deferribacteres; o_Deferribacterales; f_Deferribacteraceae; g_Mucispirillum; s_schaedleri   |
| 175213  | k_Bacteria; p_Firmicutes; c_Clostridia; o_Clostridiales; f__; g__; s__                                                       |
| 4480555 | k_Bacteria; p_Firmicutes; c_Clostridia; o_Clostridiales; f__; g__; s__                                                       |
| 4480557 | k_Bacteria; p_Firmicutes; c_Clostridia; o_Clostridiales; f_Lachnospiraceae; g__; s__                                         |
| 175077  | k_Bacteria; p_Firmicutes; c_Clostridia; o_Clostridiales; f__; g__; s__                                                       |
| 188266  | k_Bacteria; p_Firmicutes; c_Clostridia; o_Clostridiales; f_Lachnospiraceae; g__; s__                                         |
| 259578  | k_Bacteria; p_Firmicutes; c_Clostridia; o_Clostridiales; f__; g__; s__                                                       |
| 177512  | k_Bacteria; p_Bacteroidetes; c_Bacteroidia; o_Bacteroidales; f_S24-7; g__; s__                                               |
| 3319464 | k_Bacteria; p_Proteobacteria; c_Epsilonproteobacteria; o_Campylobacteriales; f_Helicobacteraceae; g__; s__                   |
| 3390534 | k_Bacteria; p_Firmicutes; c_Clostridia; o_Clostridiales; f_Ruminococcaceae; g__; s__                                         |
| 277067  | k_Bacteria; p_Firmicutes; c_Clostridia; o_Clostridiales; f__; g__; s__                                                       |
| 199674  | k_Bacteria; p_Firmicutes; c_Clostridia; o_Clostridiales; f_Lachnospiraceae; g__; s__                                         |
| 3920500 | k_Bacteria; p_Firmicutes; c_Clostridia; o_Clostridiales; f_Dehalobacteriaceae; g_Dehalobacterium; s__                        |
| 265483  | k_Bacteria; p_Firmicutes; c_Clostridia; o_Clostridiales; f_Ruminococcaceae; g_Oscillospira; s__                              |
| 399606  | k_Bacteria; p_Firmicutes; c_Clostridia; o_Clostridiales; f__; g__; s__                                                       |
| 192971  | k_Bacteria; p_Firmicutes; c_Clostridia; o_Clostridiales; f__; g__; s__                                                       |
| 275218  | k_Bacteria; p_Firmicutes; c_Clostridia; o_Clostridiales; f_Ruminococcaceae; g__; s__                                         |
| 228043  | k_Bacteria; p_Firmicutes; c_Clostridia; o_Clostridiales; f__; g__; s__                                                       |
| 261486  | k_Bacteria; p_Firmicutes; c_Clostridia; o_Clostridiales; f_Ruminococcaceae; g__; s__                                         |
| 297577  | k_Bacteria; p_Firmicutes; c_Clostridia; o_Clostridiales; f_Lachnospiraceae; g__; s__                                         |
| 3150250 | k_Bacteria; p_Firmicutes; c_Clostridia; o_Clostridiales; f_Lachnospiraceae; g__; s__                                         |
| 578016  | k_Bacteria; p_Bacteroidetes; c_Bacteroidia; o_Bacteroidales; f_Porphyrimonadaceae; g_Parabacteroides; s_distasonis           |
| 637546  | k_Bacteria; p_Proteobacteria; c_Gammaproteobacteria; o_Enterobacteriales; f_Enterobacteriaceae; g__; s__                     |
| 195691  | k_Bacteria; p_Firmicutes; c_Clostridia; o_Clostridiales; f_Lachnospiraceae; g__; s__                                         |
| 4483570 | k_Bacteria; p_Bacteroidetes; c_Bacteroidia; o_Bacteroidales; f_Rikenellaceae; g__; s__                                       |
| 4306262 | k_Bacteria; p_Verrucomicrobia; c_Verrucomicrobiae; o_Verrucomicrobiales; f_Verrucomicrobiaceae; g_Akkermansia; s_muciniphila |
| 184451  | k_Bacteria; p_Firmicutes; c_Clostridia; o_Clostridiales; f__; g__; s__                                                       |
| 184456  | k_Bacteria; p_Bacteroidetes; c_Bacteroidia; o_Bacteroidales; f_S24-7; g__; s__                                               |
| 814952  | k_Bacteria; p_Proteobacteria; c_Gammaproteobacteria; o_Enterobacteriales; f_Enterobacteriaceae; g__; s__                     |
| 264225  | k_Bacteria; p_Firmicutes; c_Clostridia; o_Clostridiales; f__; g__; s__                                                       |
| 198865  | k_Bacteria; p_Bacteroidetes; c_Bacteroidia; o_Bacteroidales; f_S24-7; g__; s__                                               |
| 4405128 | k_Bacteria; p_Cyanobacteria; c_4C0d-2; o_YS2; f__; g__; s__                                                                  |
| 3265889 | k_Bacteria; p_Firmicutes; c_Clostridia; o_Clostridiales; f_Lachnospiraceae; g__; s__                                         |
| 1107652 | k_Bacteria; p_Bacteroidetes; c_Bacteroidia; o_Bacteroidales; f_Rikenellaceae; g__; s__                                       |
| 195337  | k_Bacteria; p_Firmicutes; c_Clostridia; o_Clostridiales; f__; g__; s__                                                       |
| 196672  | k_Bacteria; p_Bacteroidetes; c_Bacteroidia; o_Bacteroidales; f_S24-7; g__; s__                                               |
| 269726  | k_Bacteria; p_Bacteroidetes; c_Bacteroidia; o_Bacteroidales; f_S24-7; g__; s__                                               |
| 179457  | k_Bacteria; p_Bacteroidetes; c_Bacteroidia; o_Bacteroidales; f_S24-7; g__; s__                                               |
| 637934  | k_Bacteria; p_Firmicutes; c_Clostridia; o_Clostridiales; f__; g__; s__                                                       |
| 262917  | k_Bacteria; p_Firmicutes; c_Clostridia; o_Clostridiales; f__; g__; s__                                                       |
| 1108599 | k_Bacteria; p_Proteobacteria; c_Deltaproteobacteria; o_Desulfovibrionales; f_Desulfovibrionaceae; g__; s__                   |
| 339329  | k_Bacteria; p_Firmicutes; c_Clostridia; o_Clostridiales; f_Lachnospiraceae; g__; s__                                         |
| 2875735 | k_Bacteria; p_Bacteroidetes; c_Bacteroidia; o_Bacteroidales; f_Bacteroidaceae; g_Bacteroides; s__                            |
| 4402834 | k_Bacteria; p_Firmicutes; c_Clostridia; o_Clostridiales; f__; g__; s__                                                       |

| ID      | Taxonomy                                                                                                                |
|---------|-------------------------------------------------------------------------------------------------------------------------|
| 313898  | k_Bacteria; p_Firmicutes; c_Clostridia; o_Clostridiales; f_Lachnospiraceae; g__; s__                                    |
| 176071  | k_Bacteria; p_Bacteroidetes; c_Bacteroidia; o_Bacteroidales; f_Bacteroidaceae; g_Bacteroides; s__                       |
| 277497  | k_Bacteria; p_Firmicutes; c_Clostridia; o_Clostridiales; f__; g__; s__                                                  |
| 349343  | k_Bacteria; p_Firmicutes; c_Clostridia; o_Clostridiales; f_Lachnospiraceae; g_Dorea; s__                                |
| 203605  | k_Bacteria; p_Bacteroidetes; c_Bacteroidia; o_Bacteroidales; f_S24-7; g__; s__                                          |
| 4389125 | k_Bacteria; p_Bacteroidetes; c_Bacteroidia; o_Bacteroidales; f_Bacteroidaceae; g_Bacteroides; s_fragilis                |
| 170926  | k_Bacteria; p_Firmicutes; c_Clostridia; o_Clostridiales; f_Ruminococcaceae; g__; s__                                    |
| 4448052 | k_Bacteria; p_Firmicutes; c_Clostridia; o_Clostridiales; f_Ruminococcaceae; g_Oscillospira; s__                         |
| 174698  | k_Bacteria; p_Firmicutes; c_Clostridia; o_Clostridiales; f__; g__; s__                                                  |
| 332962  | k_Bacteria; p_Firmicutes; c_Clostridia; o_Clostridiales; f__; g__; s__                                                  |
| 3610691 | k_Bacteria; p_Proteobacteria; c_Gammaproteobacteria; o_Enterobacteriales; f_Enterobacteriaceae; g_Proteus; s__          |
| 4390754 | k_Bacteria; p_Firmicutes; c_Clostridia; o_Clostridiales; f_Lachnospiraceae; g_[Ruminococcus]; s_gnavus                  |
| 4457427 | k_Bacteria; p_Firmicutes; c_Clostridia; o_Clostridiales; f_Lachnospiraceae; g_Lachnospira; s__                          |
| 320169  | k_Bacteria; p_Bacteroidetes; c_Bacteroidia; o_Bacteroidales; f_S24-7; g__; s__                                          |
| 265116  | k_Bacteria; p_Firmicutes; c_Clostridia; o_Clostridiales; f_Lachnospiraceae; g__; s__                                    |
| 269125  | k_Bacteria; p_Firmicutes; c_Bacilli; o_Lactobacillales; f_Lactobacillaceae; g_Lactobacillus; s__                        |
| 4449518 | k_Bacteria; p_Bacteroidetes; c_Bacteroidia; o_Bacteroidales; f_Rikenellaceae; g__; s__                                  |
| 561069  | k_Bacteria; p_Firmicutes; c_Clostridia; o_Clostridiales; f_Lachnospiraceae; g_Blautia; s__                              |
| 299171  | k_Bacteria; p_Firmicutes; c_Clostridia; o_Clostridiales; f__; g__; s__                                                  |
| 40230   | k_Bacteria; p_Proteobacteria; c_Alphaproteobacteria; o_RF32; f__; g__; s__                                              |
| 569818  | k_Bacteria; p_Firmicutes; c_Clostridia; o_Clostridiales; f__; g__; s__                                                  |
| 319219  | k_Bacteria; p_Firmicutes; c_Clostridia; o_Clostridiales; f__; g__; s__                                                  |
| 198964  | k_Bacteria; p_Bacteroidetes; c_Bacteroidia; o_Bacteroidales; f_S24-7; g__; s__                                          |
| 618010  | k_Bacteria; p_Proteobacteria; c_Gammaproteobacteria; o_Enterobacteriales; f_Enterobacteriaceae; g__; s__                |
| 342075  | k_Bacteria; p_Firmicutes; c_Clostridia; o_Clostridiales; f__; g__; s__                                                  |
| 135956  | k_Bacteria; p_Firmicutes; c_Bacilli; o_Lactobacillales; f_Lactobacillaceae; g_Lactobacillus; s__                        |
| 3919797 | k_Bacteria; p_Firmicutes; c_Clostridia; o_Clostridiales; f__; g__; s__                                                  |
| 265301  | k_Bacteria; p_Firmicutes; c_Clostridia; o_Clostridiales; f_Lachnospiraceae; g__; s__                                    |
| 578058  | k_Bacteria; p_Proteobacteria; c_Gammaproteobacteria; o_Enterobacteriales; f_Enterobacteriaceae; g_Erwinia; s__          |
| 10196   | k_Bacteria; p_Proteobacteria; c_Gammaproteobacteria; o_Enterobacteriales; f_Enterobacteriaceae; g_Brenneria; s_quercina |
| 259511  | k_Bacteria; p_Firmicutes; c_Clostridia; o_Clostridiales; f__; g__; s__                                                  |
| 183619  | k_Bacteria; p_Bacteroidetes; c_Bacteroidia; o_Bacteroidales; f_Bacteroidaceae; g_Bacteroides; s__                       |
| 261076  | k_Bacteria; p_Firmicutes; c_Clostridia; o_Clostridiales; f_Peptococcaceae; g_rc4-4; s__                                 |
| 270391  | k_Bacteria; p_Bacteroidetes; c_Bacteroidia; o_Bacteroidales; f_Rikenellaceae; g__; s__                                  |
| 4440624 | k_Bacteria; p_Firmicutes; c_Clostridia; o_Clostridiales; f_Lachnospiraceae; g__; s__                                    |
| 4460604 | k_Bacteria; p_Firmicutes; c_Clostridia; o_Clostridiales; f__; g__; s__                                                  |
| 95424   | k_Bacteria; p_Firmicutes; c_Clostridia; o_Clostridiales; f_Ruminococcaceae; g__; s__                                    |
| 436341  | k_Bacteria; p_Firmicutes; c_Clostridia; o_Clostridiales; f__; g__; s__                                                  |
| 295075  | k_Bacteria; p_Firmicutes; c_Clostridia; o_Clostridiales; f_Lachnospiraceae; g_[Ruminococcus]; s_gnavus                  |
| 1678333 | k_Bacteria; p_Firmicutes; c_Clostridia; o_Clostridiales; f_Lachnospiraceae; g_Coproccoccus; s__                         |
| 243185  | k_Bacteria; p_Proteobacteria; c_Gammaproteobacteria; o_Aeromonadales; f_Aeromonadaceae; g__; s__                        |
| 175998  | k_Bacteria; p_Firmicutes; c_Clostridia; o_Clostridiales; f_Lachnospiraceae; g_[Ruminococcus]; s_gnavus                  |
| 3267277 | k_Bacteria; p_Proteobacteria; c_Gammaproteobacteria; o_Enterobacteriales; f_Enterobacteriaceae; g_Trabulsiella; s__     |
| 1931575 | k_Bacteria; p_Firmicutes; c_Clostridia; o_Clostridiales; f_Lachnospiraceae; g__; s__                                    |
| 337784  | k_Bacteria; p_Firmicutes; c_Clostridia; o_Clostridiales; f_[Mogibacteriaceae]; g__; s__                                 |

Table S3 F

| ID      | Taxonomy                                                                                                        |
|---------|-----------------------------------------------------------------------------------------------------------------|
| 1921818 | k_Bacteria; p_Firmicutes; c_Clostridia; o_Clostridiales; f_Ruminococcaceae; g_Oscillospira; s__                 |
| 3172949 | k_Bacteria; p_Bacteroidetes; c_Bacteroidia; o_Bacteroidales; f_S24-7; g__ ; s__                                 |
| 3172943 | k_Bacteria; p_Bacteroidetes; c_Bacteroidia; o_Bacteroidales; f_S24-7; g__ ; s__                                 |
| 645358  | k_Bacteria; p_Proteobacteria; c_Alphaproteobacteria; o_RF32; f__ ; g__ ; s__                                    |
| 838685  | k_Bacteria; p_Firmicutes; c_Clostridia; o_Clostridiales; f_Ruminococcaceae; g_Oscillospira; s__                 |
| 828284  | k_Bacteria; p_Proteobacteria; c_Gammaproteobacteria; o_Aeromonadales; f_Aeromonadaceae; g__ ; s__               |
| 1111755 | k_Bacteria; p_Proteobacteria; c_Deltaproteobacteria; o_Desulfovibrionales; f_Desulfovibrionaceae; g__ ; s__     |
| 188878  | k_Bacteria; p_Firmicutes; c_Clostridia; o_Clostridiales; f__ ; g__ ; s__                                        |
| 4401580 | k_Bacteria; p_Bacteroidetes; c_Bacteroidia; o_Bacteroidales; f_Bacteroidaceae; g_Bacteroides; s__               |
| 317854  | k_Bacteria; p_Proteobacteria; c_Gammaproteobacteria; o_Oceanospirillales; f_Halomonadaceae; g_Halomonas; s__    |
| 4256470 | k_Bacteria; p_Bacteroidetes; c_Bacteroidia; o_Bacteroidales; f_Bacteroidaceae; g_Bacteroides; s_ovatus          |
| 839558  | k_Bacteria; p_Bacteroidetes; c_Bacteroidia; o_Bacteroidales; f_S24-7; g__ ; s__                                 |
| 185743  | k_Bacteria; p_Firmicutes; c_Clostridia; o_Clostridiales; f__ ; g__ ; s__                                        |
| 4378740 | k_Bacteria; p_Bacteroidetes; c_Bacteroidia; o_Bacteroidales; f_Prevotellaceae; g_Prevotella; s__                |
| 266206  | k_Bacteria; p_Firmicutes; c_Clostridia; o_Clostridiales; f__ ; g__ ; s__                                        |
| 270513  | k_Bacteria; p_Firmicutes; c_Clostridia; o_Clostridiales; f_Lachnospiraceae; g__ ; s__                           |
| 334697  | k_Bacteria; p_Firmicutes; c_Clostridia; o_Clostridiales; f__ ; g__ ; s__                                        |
| 4352471 | k_Bacteria; p_Proteobacteria; c_Gammaproteobacteria; o_Enterobacteriales; f_Enterobacteriaceae; g__ ; s__       |
| 4426367 | k_Bacteria; p_Cyanobacteria; c_4C0d-2; o_YS2; f__ ; g__ ; s__                                                   |
| 209030  | k_Bacteria; p_Bacteroidetes; c_Bacteroidia; o_Bacteroidales; f_S24-7; g__ ; s__                                 |
| 190646  | k_Bacteria; p_Firmicutes; c_Clostridia; o_Clostridiales; f_Ruminococcaceae; g__ ; s__                           |
| 172389  | k_Bacteria; p_Firmicutes; c_Clostridia; o_Clostridiales; f_Lachnospiraceae; g__ ; s__                           |
| 213896  | k_Bacteria; p_Firmicutes; c_Clostridia; o_Clostridiales; f_Lachnospiraceae; g__ ; s__                           |
| 161762  | k_Bacteria; p_Firmicutes; c_Clostridia; o_Clostridiales; f_Ruminococcaceae; g_Ruminococcus; s__                 |
| 174441  | k_Bacteria; p_Firmicutes; c_Clostridia; o_Clostridiales; f_Ruminococcaceae; g_Oscillospira; s__                 |
| 135625  | k_Bacteria; p_Firmicutes; c_Clostridia; o_Clostridiales; f_Lachnospiraceae; g_[Ruminococcus]; s_gnavus          |
| 4365109 | k_Bacteria; p_Firmicutes; c_Clostridia; o_Clostridiales; f__ ; g__ ; s__                                        |
| 832558  | k_Bacteria; p_Firmicutes; c_Clostridia; o_Clostridiales; f_Ruminococcaceae; g_Oscillospira; s__                 |
| 4464113 | k_Bacteria; p_Firmicutes; c_Clostridia; o_Clostridiales; f__ ; g__ ; s__                                        |
| 1105376 | k_Bacteria; p_Proteobacteria; c_Betaproteobacteria; o_Burkholderiales; f_Alcaligenaceae; g_Sutterella; s__      |
| 346275  | k_Bacteria; p_Firmicutes; c_Clostridia; o_Clostridiales; f__ ; g__ ; s__                                        |
| 3505032 | k_Bacteria; p_Proteobacteria; c_Gammaproteobacteria; o_Alteromonadales; f_Shewanellaceae; g_Shewanella; s_algae |
| 4355436 | k_Bacteria; p_Firmicutes; c_Clostridia; o_Clostridiales; f__ ; g__ ; s__                                        |
| 4480176 | k_Bacteria; p_Firmicutes; c_Clostridia; o_Clostridiales; f__ ; g__ ; s__                                        |
| 344527  | k_Bacteria; p_Firmicutes; c_Clostridia; o_Clostridiales; f_Ruminococcaceae; g__ ; s__                           |
| 4372003 | k_Bacteria; p_Bacteroidetes; c_Bacteroidia; o_Bacteroidales; f_Porphyrromonadaceae; g_Parabacteroides; s__      |
| 172464  | k_Bacteria; p_Firmicutes; c_Clostridia; o_Clostridiales; f__ ; g__ ; s__                                        |
| 289709  | k_Bacteria; p_Proteobacteria; c_Gammaproteobacteria; o_Enterobacteriales; f_Enterobacteriaceae; g__ ; s__       |
| 174854  | k_Bacteria; p_Firmicutes; c_Clostridia; o_Clostridiales; f__ ; g__ ; s__                                        |
| 830014  | k_Bacteria; p_Firmicutes; c_Clostridia; o_Clostridiales; f__ ; g__ ; s__                                        |
| 189666  | k_Bacteria; p_Firmicutes; c_Clostridia; o_Clostridiales; f__ ; g__ ; s__                                        |
| 304416  | k_Bacteria; p_Firmicutes; c_Clostridia; o_Clostridiales; f_Ruminococcaceae; g__ ; s__                           |
| 214835  | k_Bacteria; p_Firmicutes; c_Clostridia; o_Clostridiales; f_Lachnospiraceae; g__ ; s__                           |
| 260346  | k_Bacteria; p_Firmicutes; c_Clostridia; o_Clostridiales; f_Lachnospiraceae; g__ ; s__                           |
| 195445  | k_Bacteria; p_Firmicutes; c_Clostridia; o_Clostridiales; f__ ; g__ ; s__                                        |



| ID      | Taxonomy                                                                                                                   |
|---------|----------------------------------------------------------------------------------------------------------------------------|
| 263420  | k_Bacteria; p_Bacteroidetes; c_Bacteroidia; o_Bacteroidales; f_S24-7; g_; s__                                              |
| 187959  | k_Bacteria; p_Bacteroidetes; c_Bacteroidia; o_Bacteroidales; f_S24-7; g_; s__                                              |
| 199707  | k_Bacteria; p_Bacteroidetes; c_Bacteroidia; o_Bacteroidales; f_S24-7; g_; s__                                              |
| 175485  | k_Bacteria; p_Bacteroidetes; c_Bacteroidia; o_Bacteroidales; f_Bacteroidaceae; g_Bacteroides; s__                          |
| 193064  | k_Bacteria; p_Firmicutes; c_Clostridia; o_Clostridiales; f_; g_; s__                                                       |
| 174285  | k_Bacteria; p_Firmicutes; c_Clostridia; o_Clostridiales; f_; g_; s__                                                       |
| 1110752 | k_Bacteria; p_Bacteroidetes; c_Bacteroidia; o_Bacteroidales; f_S24-7; g_; s__                                              |
| 177414  | k_Bacteria; p_Bacteroidetes; c_Bacteroidia; o_Bacteroidales; f_S24-7; g_; s__                                              |
| 882782  | k_Bacteria; p_Bacteroidetes; c_Bacteroidia; o_Bacteroidales; f_S24-7; g_; s__                                              |
| 180465  | k_Bacteria; p_Firmicutes; c_Clostridia; o_Clostridiales; f_; g_; s__                                                       |
| 1113553 | k_Bacteria; p_Proteobacteria; c_Gammaproteobacteria; o_Oceanospirillales; f_Halomonadaceae; g_Halomonas; s__               |
| 347490  | k_Bacteria; p_Firmicutes; c_Clostridia; o_Clostridiales; f_; g_; s__                                                       |
| 322991  | k_Bacteria; p_Bacteroidetes; c_Bacteroidia; o_Bacteroidales; f_S24-7; g_; s__                                              |
| 4327628 | k_Bacteria; p_Proteobacteria; c_Gammaproteobacteria; o_Enterobacteriales; f_Enterobacteriaceae; g_; s__                    |
| 819999  | k_Bacteria; p_Proteobacteria; c_Gammaproteobacteria; o_Enterobacteriales; f_Enterobacteriaceae; g_; s__                    |
| 4402077 | k_Bacteria; p_Firmicutes; c_Clostridia; o_Clostridiales; f_; g_; s__                                                       |
| 63144   | k_Bacteria; p_Proteobacteria; c_Gammaproteobacteria; o_Oceanospirillales; f_Halomonadaceae; g_Halomonas; s__               |
| 233691  | k_Bacteria; p_Firmicutes; c_Clostridia; o_Clostridiales; f_; g_; s__                                                       |
| 1108453 | k_Bacteria; p_Firmicutes; c_Clostridia; o_Clostridiales; f_; g_; s__                                                       |
| 38278   | k_Bacteria; p_Bacteroidetes; c_Bacteroidia; o_Bacteroidales; f_S24-7; g_; s__                                              |
| 181419  | k_Bacteria; p_Firmicutes; c_Clostridia; o_Clostridiales; f_; g_; s__                                                       |
| 183675  | k_Bacteria; p_Firmicutes; c_Clostridia; o_Clostridiales; f_Ruminococcaceae; g_Oscillospira; s__                            |
| 259901  | k_Bacteria; p_Firmicutes; c_Clostridia; o_Clostridiales; f_Lachnospiraceae; g_; s__                                        |
| 322839  | k_Bacteria; p_Firmicutes; c_Clostridia; o_Clostridiales; f_; g_; s__                                                       |
| 194388  | k_Bacteria; p_Firmicutes; c_Clostridia; o_Clostridiales; f_; g_; s__                                                       |
| 307416  | k_Bacteria; p_Firmicutes; c_Clostridia; o_Clostridiales; f_; g_; s__                                                       |
| 190063  | k_Bacteria; p_Firmicutes; c_Clostridia; o_Clostridiales; f_; g_; s__                                                       |
| 313274  | k_Bacteria; p_Firmicutes; c_Clostridia; o_Clostridiales; f_Ruminococcaceae; g_Oscillospira; s__                            |
| 1136443 | k_Bacteria; p_Deferribacteres; c_Deferribacteres; o_Deferribacterales; f_Deferribacteraceae; g_Mucispirillum; s_schaedleri |
| 421893  | k_Bacteria; p_Firmicutes; c_Clostridia; o_Clostridiales; f_; g_; s__                                                       |
| 3325760 | k_Bacteria; p_Firmicutes; c_Clostridia; o_Clostridiales; f_; g_; s__                                                       |
| 343130  | k_Bacteria; p_Firmicutes; c_Clostridia; o_Clostridiales; f_; g_; s__                                                       |
| 174260  | k_Bacteria; p_Firmicutes; c_Clostridia; o_Clostridiales; f_; g_; s__                                                       |
| 4453627 | k_Bacteria; p_Firmicutes; c_Clostridia; o_Clostridiales; f_Lachnospiraceae; g_; s__                                        |
| 348785  | k_Bacteria; p_Firmicutes; c_Clostridia; o_Clostridiales; f_; g_; s__                                                       |
| 189789  | k_Bacteria; p_Firmicutes; c_Clostridia; o_Clostridiales; f_; g_; s__                                                       |
| 3056461 | k_Bacteria; p_Bacteroidetes; c_Bacteroidia; o_Bacteroidales; f_Rikenellaceae; g_; s__                                      |
| 188785  | k_Bacteria; p_Firmicutes; c_Clostridia; o_Clostridiales; f_; g_; s__                                                       |
| 354736  | k_Bacteria; p_Firmicutes; c_Clostridia; o_Clostridiales; f_; g_; s__                                                       |
| 263953  | k_Bacteria; p_Firmicutes; c_Clostridia; o_Clostridiales; f_; g_; s__                                                       |
| 635304  | k_Bacteria; p_Proteobacteria; c_Gammaproteobacteria; o_Enterobacteriales; f_Enterobacteriaceae; g_; s__                    |
| 309663  | k_Bacteria; p_Firmicutes; c_Clostridia; o_Clostridiales; f_; g_; s__                                                       |
| 198604  | k_Bacteria; p_Bacteroidetes; c_Bacteroidia; o_Bacteroidales; f_S24-7; g_; s__                                              |
| 205160  | k_Bacteria; p_Bacteroidetes; c_Bacteroidia; o_Bacteroidales; f_S24-7; g_; s__                                              |
| 264657  | k_Bacteria; p_Bacteroidetes; c_Bacteroidia; o_Bacteroidales; f_S24-7; g_; s__                                              |

| ID      | Taxonomy                                                                                                       |
|---------|----------------------------------------------------------------------------------------------------------------|
| 273928  | k_Bacteria; p_Firmicutes; c_Clostridia; o_Clostridiales; f__; g__; s__                                         |
| 197025  | k_Bacteria; p_Firmicutes; c_Clostridia; o_Clostridiales; f__; g__; s__                                         |
| 157999  | k_Bacteria; p_Firmicutes; c_Clostridia; o_Clostridiales; f_Lachnospiraceae; g__; s__                           |
| 385545  | k_Bacteria; p_Firmicutes; c_Clostridia; o_Clostridiales; f__; g__; s__                                         |
| 186777  | k_Bacteria; p_Firmicutes; c_Clostridia; o_Clostridiales; f_Lachnospiraceae; g__; s__                           |
| 30067   | k_Bacteria; p_Firmicutes; c_Clostridia; o_Clostridiales; f_Ruminococcaceae; g__; s__                           |
| 177205  | k_Bacteria; p_Bacteroidetes; c_Bacteroidia; o_Bacteroidales; f_S24-7; g__; s__                                 |
| 4401375 | k_Bacteria; p_Bacteroidetes; c_Bacteroidia; o_Bacteroidales; f_Bacteroidaceae; g_Bacteroides; s_uniformis      |
| 176139  | k_Bacteria; p_Firmicutes; c_Clostridia; o_Clostridiales; f__; g__; s__                                         |
| 3998912 | k_Bacteria; p_Firmicutes; c_Clostridia; o_Clostridiales; f__; g__; s__                                         |
| 175114  | k_Bacteria; p_Firmicutes; c_Clostridia; o_Clostridiales; f__; g__; s__                                         |
| 176868  | k_Bacteria; p_Firmicutes; c_Clostridia; o_Clostridiales; f_Dehalobacteriaceae; g_Dehalobacterium; s__          |
| 191878  | k_Bacteria; p_Firmicutes; c_Clostridia; o_Clostridiales; f_Lachnospiraceae; g__; s__                           |
| 259195  | k_Bacteria; p_Firmicutes; c_Clostridia; o_Clostridiales; f_Ruminococcaceae; g_Ruminococcus; s__                |
| 174791  | k_Bacteria; p_Bacteroidetes; c_Bacteroidia; o_Bacteroidales; f_S24-7; g__; s__                                 |
| 2624257 | k_Bacteria; p_Bacteroidetes; c_Bacteroidia; o_Bacteroidales; f_Bacteroidaceae; g_Bacteroides; s__              |
| 271734  | k_Bacteria; p_Firmicutes; c_Clostridia; o_Clostridiales; f__; g__; s__                                         |
| 174420  | k_Bacteria; p_Bacteroidetes; c_Bacteroidia; o_Bacteroidales; f_S24-7; g__; s__                                 |
| 1517779 | k_Bacteria; p_Bacteroidetes; c_Bacteroidia; o_Bacteroidales; f_Rikenellaceae; g__; s__                         |
| 1108378 | k_Bacteria; p_Firmicutes; c_Clostridia; o_Clostridiales; f__; g__; s__                                         |
| 319816  | k_Bacteria; p_Firmicutes; c_Clostridia; o_Clostridiales; f__; g__; s__                                         |
| 606063  | k_Bacteria; p_Proteobacteria; c_Gammaproteobacteria; o_Enterobacteriales; f_Enterobacteriaceae; g_Erwinia; s__ |
| 4420272 | k_Bacteria; p_Firmicutes; c_Clostridia; o_Clostridiales; f_Lachnospiraceae; g__; s__                           |
| 266091  | k_Bacteria; p_Firmicutes; c_Clostridia; o_Clostridiales; f__; g__; s__                                         |
| 177014  | k_Bacteria; p_Bacteroidetes; c_Bacteroidia; o_Bacteroidales; f_S24-7; g__; s__                                 |
| 2978254 | k_Bacteria; p_Firmicutes; c_Clostridia; o_Clostridiales; f_Ruminococcaceae; g_Ruminococcus; s__                |
| 51677   | k_Bacteria; p_Firmicutes; c_Clostridia; o_Clostridiales; f__; g__; s__                                         |
| 345211  | k_Bacteria; p_Firmicutes; c_Clostridia; o_Clostridiales; f__; g__; s__                                         |
| 4476330 | k_Bacteria; p_Firmicutes; c_Clostridia; o_Clostridiales; f_Lachnospiraceae; g_Coprococcus; s__                 |
| 113417  | k_Bacteria; p_Proteobacteria; c_Deltaproteobacteria; o_Desulfovibrionales; f_Desulfovibrionaceae; g__; s__     |
| 174651  | k_Bacteria; p_Firmicutes; c_Clostridia; o_Clostridiales; f_Ruminococcaceae; g__; s__                           |
| 263366  | k_Bacteria; p_Firmicutes; c_Clostridia; o_Clostridiales; f__; g__; s__                                         |
| 178068  | k_Bacteria; p_Bacteroidetes; c_Bacteroidia; o_Bacteroidales; f_S24-7; g__; s__                                 |
| 273904  | k_Bacteria; p_Firmicutes; c_Clostridia; o_Clostridiales; f__; g__; s__                                         |
| 258559  | k_Bacteria; p_Firmicutes; c_Clostridia; o_Clostridiales; f_Lachnospiraceae; g__; s__                           |
| 2315700 | k_Bacteria; p_Firmicutes; c_Clostridia; o_Clostridiales; f_Ruminococcaceae; g_Ruminococcus; s__                |
| 4418586 | k_Bacteria; p_Firmicutes; c_Clostridia; o_Clostridiales; f__; g__; s__                                         |
| 276629  | k_Bacteria; p_Bacteroidetes; c_Bacteroidia; o_Bacteroidales; f_S24-7; g__; s__                                 |
| 4424327 | k_Bacteria; p_Firmicutes; c_Clostridia; o_Clostridiales; f__; g__; s__                                         |
| 831301  | k_Bacteria; p_Firmicutes; c_Erysipelotrichi; o_Erysipelotrichales; f_Erysipelotrichaceae; g__; s__             |
| 190026  | k_Bacteria; p_Bacteroidetes; c_Bacteroidia; o_Bacteroidales; f_Rikenellaceae; g_AF12; s__                      |
| 4476780 | k_Bacteria; p_Bacteroidetes; c_Bacteroidia; o_Bacteroidales; f_Rikenellaceae; g__; s__                         |
| 570367  | k_Bacteria; p_Firmicutes; c_Clostridia; o_Clostridiales; f_Lachnospiraceae; g__; s__                           |
| 210950  | k_Bacteria; p_Bacteroidetes; c_Bacteroidia; o_Bacteroidales; f_S24-7; g__; s__                                 |
| 4366524 | k_Bacteria; p_Firmicutes; c_Clostridia; o_Clostridiales; f__; g__; s__                                         |

| ID      | Taxonomy                                                                                                       |
|---------|----------------------------------------------------------------------------------------------------------------|
| 272192  | k_Bacteria; p_Firmicutes; c_Clostridia; o_Clostridiales; f_Ruminococcaceae; g_Oscillospira; s__                |
| 136604  | k_Bacteria; p_Firmicutes; c_Clostridia; o_Clostridiales; f_Lachnospiraceae; g__; s__                           |
| 192316  | k_Bacteria; p_Bacteroidetes; c_Bacteroidia; o_Bacteroidales; f_S24-7; g__; s__                                 |
| 2072645 | k_Bacteria; p_Proteobacteria; c_Gammaproteobacteria; o_Enterobacteriales; f_Enterobacteriaceae; g__; s__       |
| 181719  | k_Bacteria; p_Bacteroidetes; c_Bacteroidia; o_Bacteroidales; f_Bacteroidaceae; g_Bacteroides; s__              |
| 292892  | k_Bacteria; p_Firmicutes; c_Clostridia; o_Clostridiales; f__; g__; s__                                         |
| 340600  | k_Bacteria; p_Firmicutes; c_Clostridia; o_Clostridiales; f__; g__; s__                                         |
| 261590  | k_Bacteria; p_Firmicutes; c_Clostridia; o_Clostridiales; f_Peptostreptococcaceae; g__; s__                     |
| 168984  | k_Bacteria; p_Firmicutes; c_Clostridia; o_Clostridiales; f_Lachnospiraceae; g__; s__                           |
| 1703712 | k_Bacteria; p_Bacteroidetes; c_Bacteroidia; o_Bacteroidales; f_Bacteroidaceae; g_Bacteroides; s__              |
| 264345  | k_Bacteria; p_Firmicutes; c_Clostridia; o_Clostridiales; f_Lachnospiraceae; g__; s__                           |
| 209845  | k_Bacteria; p_Firmicutes; c_Clostridia; o_Clostridiales; f_Ruminococcaceae; g__; s__                           |
| 198209  | k_Bacteria; p_Firmicutes; c_Clostridia; o_Clostridiales; f_Clostridiaceae; g_SMB53; s__                        |
| 171532  | k_Bacteria; p_Firmicutes; c_Clostridia; o_Clostridiales; f_Lachnospiraceae; g__; s__                           |
| 299600  | k_Bacteria; p_Firmicutes; c_Clostridia; o_Clostridiales; f_Ruminococcaceae; g__; s__                           |
| 273967  | k_Bacteria; p_Firmicutes; c_Clostridia; o_Clostridiales; f_Lachnospiraceae; g__; s__                           |
| 4449984 | k_Bacteria; p_Firmicutes; c_Erysipelotrichi; o_Erysipelotrichales; f_Erysipelotrichaceae; g_Coprobacillus; s__ |
| 325850  | k_Bacteria; p_Proteobacteria; c_Alphaproteobacteria; o_RF32; f__; g__; s__                                     |
| 801260  | k_Bacteria; p_Bacteroidetes; c_Bacteroidia; o_Bacteroidales; f_S24-7; g__; s__                                 |
| 259631  | k_Bacteria; p_Firmicutes; c_Clostridia; o_Clostridiales; f__; g__; s__                                         |
| 278609  | k_Bacteria; p_Firmicutes; c_Clostridia; o_Clostridiales; f_Ruminococcaceae; g_Oscillospira; s__                |
| 264155  | k_Bacteria; p_Firmicutes; c_Clostridia; o_Clostridiales; f__; g__; s__                                         |
| 333576  | k_Bacteria; p_Firmicutes; c_Clostridia; o_Clostridiales; f__; g__; s__                                         |
| 194665  | k_Bacteria; p_Firmicutes; c_Clostridia; o_Clostridiales; f_Ruminococcaceae; g_Oscillospira; s__                |
| 194662  | k_Bacteria; p_Firmicutes; c_Clostridia; o_Clostridiales; f__; g__; s__                                         |
| 2897332 | k_Bacteria; p_Firmicutes; c_Clostridia; o_Clostridiales; f_Lachnospiraceae; g_[Ruminococcus]; s_gnavus         |
| 178490  | k_Bacteria; p_Firmicutes; c_Clostridia; o_Clostridiales; f__; g__; s__                                         |
| 262801  | k_Bacteria; p_Firmicutes; c_Clostridia; o_Clostridiales; f__; g__; s__                                         |
| 4471130 | k_Bacteria; p_Firmicutes; c_Clostridia; o_Clostridiales; f_Lachnospiraceae; g_[Ruminococcus]; s_gnavus         |
| 4471135 | k_Bacteria; p_Firmicutes; c_Clostridia; o_Clostridiales; f__; g__; s__                                         |
| 259275  | k_Bacteria; p_Firmicutes; c_Clostridia; o_Clostridiales; f_Ruminococcaceae; g__; s__                           |
| 198194  | k_Bacteria; p_Firmicutes; c_Clostridia; o_Clostridiales; f_Ruminococcaceae; g_Oscillospira; s__                |
| 575261  | k_Bacteria; p_Firmicutes; c_Clostridia; o_Clostridiales; f_Lachnospiraceae; g__; s__                           |
| 258849  | k_Bacteria; p_Bacteroidetes; c_Bacteroidia; o_Bacteroidales; f_S24-7; g__; s__                                 |
| 4045882 | k_Bacteria; p_Firmicutes; c_Clostridia; o_Clostridiales; f_Lachnospiraceae; g__; s__                           |
| 177917  | k_Bacteria; p_Bacteroidetes; c_Bacteroidia; o_Bacteroidales; f_S24-7; g__; s__                                 |
| 298973  | k_Bacteria; p_Firmicutes; c_Clostridia; o_Clostridiales; f_Lachnospiraceae; g__; s__                           |
| 835456  | k_Bacteria; p_Firmicutes; c_Clostridia; o_Clostridiales; f__; g__; s__                                         |
| 276663  | k_Bacteria; p_Firmicutes; c_Clostridia; o_Clostridiales; f__; g__; s__                                         |
| 3868285 | k_Bacteria; p_Firmicutes; c_Clostridia; o_Clostridiales; f__; g__; s__                                         |
| 276484  | k_Bacteria; p_Bacteroidetes; c_Bacteroidia; o_Bacteroidales; f_Bacteroidaceae; g_Bacteroides; s__              |
| 192598  | k_Bacteria; p_Firmicutes; c_Clostridia; o_Clostridiales; f_Ruminococcaceae; g_Ruminococcus; s__                |
| 4343528 | k_Bacteria; p_Firmicutes; c_Clostridia; o_Clostridiales; f_Ruminococcaceae; g_Oscillospira; s__                |
| 260233  | k_Bacteria; p_Firmicutes; c_Clostridia; o_Clostridiales; f__; g__; s__                                         |
| 174770  | k_Bacteria; p_Firmicutes; c_Clostridia; o_Clostridiales; f__; g__; s__                                         |

| ID      | Taxonomy                                                                                                       |
|---------|----------------------------------------------------------------------------------------------------------------|
| 272953  | k_Bacteria; p_Firmicutes; c_Clostridia; o_Clostridiales; f_Ruminococcaceae; g_Oscillospira; s__                |
| 176886  | k_Bacteria; p_Bacteroidetes; c_Bacteroidia; o_Bacteroidales; f_S24-7; g__; s__                                 |
| 4466618 | k_Bacteria; p_Proteobacteria; c_Gammaproteobacteria; o_Enterobacteriales; f_Enterobacteriaceae; g_Erwinia; s__ |
| 259870  | k_Bacteria; p_Firmicutes; c_Clostridia; o_Clostridiales; f__; g__; s__                                         |
| 4450025 | k_Bacteria; p_Firmicutes; c_Clostridia; o_Clostridiales; f_Lachnospiraceae; g__; s__                           |
| 661055  | k_Bacteria; p_Firmicutes; c_Clostridia; o_Clostridiales; f__; g__; s__                                         |
| 210292  | k_Bacteria; p_Firmicutes; c_Clostridia; o_Clostridiales; f_Ruminococcaceae; g_Oscillospira; s__                |
| 166099  | k_Bacteria; p_Firmicutes; c_Clostridia; o_Clostridiales; f__; g__; s__                                         |
| 345582  | k_Bacteria; p_Firmicutes; c_Clostridia; o_Clostridiales; f_Ruminococcaceae; g_Oscillospira; s__                |
| 261334  | k_Bacteria; p_Firmicutes; c_Clostridia; o_Clostridiales; f_Lachnospiraceae; g__; s__                           |
| 136783  | k_Bacteria; p_Firmicutes; c_Clostridia; o_Clostridiales; f__; g__; s__                                         |
| 314424  | k_Bacteria; p_Firmicutes; c_Clostridia; o_Clostridiales; f__; g__; s__                                         |
| 771140  | k_Bacteria; p_Firmicutes; c_Clostridia; o_Clostridiales; f__; g__; s__                                         |
| 177930  | k_Bacteria; p_Firmicutes; c_Clostridia; o_Clostridiales; f_Lachnospiraceae; g__; s__                           |
| 274095  | k_Bacteria; p_Firmicutes; c_Clostridia; o_Clostridiales; f_Lachnospiraceae; g_[Ruminococcus]; s_gnavus         |
| 185519  | k_Bacteria; p_Firmicutes; c_Clostridia; o_Clostridiales; f_Lachnospiraceae; g_Coproccoccus; s__                |
| 162639  | k_Bacteria; p_Bacteroidetes; c_Bacteroidia; o_Bacteroidales; f_S24-7; g__; s__                                 |
| 578649  | k_Bacteria; p_Firmicutes; c_Clostridia; o_Clostridiales; f_Lachnospiraceae; g__; s__                           |
| 312311  | k_Bacteria; p_Firmicutes; c_Clostridia; o_Clostridiales; f_Lachnospiraceae; g__; s__                           |
| 569522  | k_Bacteria; p_Firmicutes; c_Clostridia; o_Clostridiales; f__; g__; s__                                         |
| 2212505 | k_Bacteria; p_Bacteroidetes; c_Bacteroidia; o_Bacteroidales; f_S24-7; g__; s__                                 |
| 214120  | k_Bacteria; p_Bacteroidetes; c_Bacteroidia; o_Bacteroidales; f_S24-7; g__; s__                                 |
| 258411  | k_Bacteria; p_Firmicutes; c_Clostridia; o_Clostridiales; f__; g__; s__                                         |
| 4371295 | k_Bacteria; p_Firmicutes; c_Clostridia; o_Clostridiales; f_Ruminococcaceae; g__; s__                           |
| 2797565 | k_Bacteria; p_Firmicutes; c_Clostridia; o_Clostridiales; f_[Mogibacteriaceae]; g__; s__                        |
| 1991255 | k_Bacteria; p_Firmicutes; c_Clostridia; o_Clostridiales; f_Lachnospiraceae; g__; s__                           |
| 261350  | k_Bacteria; p_Bacteroidetes; c_Bacteroidia; o_Bacteroidales; f_S24-7; g__; s__                                 |
| 14035   | k_Bacteria; p_Firmicutes; c_Clostridia; o_Clostridiales; f__; g__; s__                                         |
| 264325  | k_Bacteria; p_Bacteroidetes; c_Bacteroidia; o_Bacteroidales; f_Rikenellaceae; g__; s__                         |
| 437137  | k_Bacteria; p_Proteobacteria; c_Betaproteobacteria; o_Burkholderiales; f_Alcaligenaceae; g_Sutterella; s__     |
| 4481359 | k_Bacteria; p_Firmicutes; c_Clostridia; o_Clostridiales; f_Lachnospiraceae; g__; s__                           |
| 112720  | k_Bacteria; p_Bacteroidetes; c_Bacteroidia; o_Bacteroidales; f_Rikenellaceae; g__; s__                         |
| 311788  | k_Bacteria; p_Bacteroidetes; c_Bacteroidia; o_Bacteroidales; f_S24-7; g__; s__                                 |
| 833381  | k_Bacteria; p_Firmicutes; c_Clostridia; o_Clostridiales; f_Lachnospiraceae; g_Coproccoccus; s__                |
| 177952  | k_Bacteria; p_Firmicutes; c_Clostridia; o_Clostridiales; f_Ruminococcaceae; g_Ruminococcus; s__                |
| 4483264 | k_Bacteria; p_Firmicutes; c_Clostridia; o_Clostridiales; f_Ruminococcaceae; g__; s__                           |
| 310781  | k_Bacteria; p_Cyanobacteria; c_4C0d-2; o_YS2; f__; g__; s__                                                    |
| 4477372 | k_Bacteria; p_Firmicutes; c_Clostridia; o_Clostridiales; f_Lachnospiraceae; g_Coproccoccus; s__                |
| 342685  | k_Bacteria; p_Cyanobacteria; c_4C0d-2; o_YS2; f__; g__; s__                                                    |
| 4413888 | k_Bacteria; p_Firmicutes; c_Clostridia; o_Clostridiales; f_Ruminococcaceae; g__; s__                           |
| 273091  | k_Bacteria; p_Firmicutes; c_Clostridia; o_Clostridiales; f__; g__; s__                                         |
| 324013  | k_Bacteria; p_Bacteroidetes; c_Bacteroidia; o_Bacteroidales; f_S24-7; g__; s__                                 |
| 177371  | k_Bacteria; p_Bacteroidetes; c_Bacteroidia; o_Bacteroidales; f_S24-7; g__; s__                                 |
| 4393892 | k_Bacteria; p_Firmicutes; c_Clostridia; o_Clostridiales; f__; g__; s__                                         |
| 4378477 | k_Bacteria; p_Proteobacteria; c_Gammaproteobacteria; o_Alteromonadales; f_Shewanellaceae; g_Shewanella; s__    |

| ID      | Taxonomy                                                                                                         |
|---------|------------------------------------------------------------------------------------------------------------------|
| 4327763 | k_Bacteria; p_Firmicutes; c_Clostridia; o_Clostridiales; f_Lachnospiraceae; g_; s_                               |
| 1902400 | k_Bacteria; p_Firmicutes; c_Clostridia; o_Clostridiales; f_Lachnospiraceae; g_; s_                               |
| 181091  | k_Bacteria; p_Firmicutes; c_Clostridia; o_Clostridiales; f_; g_; s_                                              |
| 4384058 | k_Bacteria; p_Proteobacteria; c_Gammaproteobacteria; o_Enterobacteriales; f_Enterobacteriaceae; g_Salmonella; s_ |
| 1112373 | k_Bacteria; p_Bacteroidetes; c_Bacteroidia; o_Bacteroidales; f_S24-7; g_; s_                                     |
| 180879  | k_Bacteria; p_Firmicutes; c_Clostridia; o_Clostridiales; f_Ruminococcaceae; g_Oscillospira; s_                   |
| 356226  | k_Bacteria; p_Bacteroidetes; c_Bacteroidia; o_Bacteroidales; f_S24-7; g_; s_                                     |
| 197706  | k_Bacteria; p_Firmicutes; c_Clostridia; o_Clostridiales; f_; g_; s_                                              |
| 264468  | k_Bacteria; p_Firmicutes; c_Clostridia; o_Clostridiales; f_; g_; s_                                              |
| 186549  | k_Bacteria; p_Firmicutes; c_Clostridia; o_Clostridiales; f_; g_; s_                                              |
| 185550  | k_Bacteria; p_Bacteroidetes; c_Bacteroidia; o_Bacteroidales; f_S24-7; g_; s_                                     |
| 177748  | k_Bacteria; p_Firmicutes; c_Clostridia; o_Clostridiales; f_; g_; s_                                              |
| 189309  | k_Bacteria; p_Firmicutes; c_Clostridia; o_Clostridiales; f_Ruminococcaceae; g_; s_                               |
| 688800  | k_Bacteria; p_Firmicutes; c_Clostridia; o_Clostridiales; f_Ruminococcaceae; g_; s_                               |
| 3013444 | k_Bacteria; p_Bacteroidetes; c_Bacteroidia; o_Bacteroidales; f_; g_; s_                                          |
| 174056  | k_Bacteria; p_Bacteroidetes; c_Bacteroidia; o_Bacteroidales; f_S24-7; g_; s_                                     |
| 583266  | k_Bacteria; p_Firmicutes; c_Clostridia; o_Clostridiales; f_Lachnospiraceae; g_; s_                               |
| 180077  | k_Bacteria; p_Bacteroidetes; c_Bacteroidia; o_Bacteroidales; f_S24-7; g_; s_                                     |
| 813805  | k_Bacteria; p_Proteobacteria; c_Gammaproteobacteria; o_Enterobacteriales; f_Enterobacteriaceae; g_Erwinia; s_    |
| 381666  | k_Bacteria; p_Cyanobacteria; c_4C0d-2; o_YS2; f_; g_; s_                                                         |
| 4449524 | k_Bacteria; p_Bacteroidetes; c_Bacteroidia; o_Bacteroidales; f_Prevotellaceae; g_Prevotella; s_                  |
| 4441792 | k_Bacteria; p_Proteobacteria; c_Betaproteobacteria; o_Burkholderiales; f_; g_; s_                                |
| 259006  | k_Bacteria; p_Firmicutes; c_Clostridia; o_Clostridiales; f_; g_; s_                                              |
| 190114  | k_Bacteria; p_Firmicutes; c_Clostridia; o_Clostridiales; f_Ruminococcaceae; g_; s_                               |
| 175227  | k_Bacteria; p_Firmicutes; c_Clostridia; o_Clostridiales; f_; g_; s_                                              |
| 4464787 | k_Bacteria; p_Firmicutes; c_Clostridia; o_Clostridiales; f_; g_; s_                                              |
| 4433554 | k_Bacteria; p_Firmicutes; c_Clostridia; o_Clostridiales; f_; g_; s_                                              |
| 228798  | k_Bacteria; p_Firmicutes; c_Clostridia; o_Clostridiales; f_; g_; s_                                              |
| 1109929 | k_Bacteria; p_Firmicutes; c_Clostridia; o_Clostridiales; f_; g_; s_                                              |
| 191098  | k_Bacteria; p_Firmicutes; c_Clostridia; o_Clostridiales; f_Lachnospiraceae; g_; s_                               |
| 196664  | k_Bacteria; p_Bacteroidetes; c_Bacteroidia; o_Bacteroidales; f_Bacteroidaceae; g_Bacteroides; s_uniformis        |
| 279026  | k_Bacteria; p_Firmicutes; c_Clostridia; o_Clostridiales; f_Lachnospiraceae; g_[Ruminococcus]; s_gnavus           |
| 179958  | k_Bacteria; p_Bacteroidetes; c_Bacteroidia; o_Bacteroidales; f_S24-7; g_; s_                                     |
| 206324  | k_Bacteria; p_Bacteroidetes; c_Bacteroidia; o_Bacteroidales; f_S24-7; g_; s_                                     |
| 174071  | k_Bacteria; p_Firmicutes; c_Clostridia; o_Clostridiales; f_; g_; s_                                              |
| 288128  | k_Bacteria; p_Firmicutes; c_Clostridia; o_Clostridiales; f_Ruminococcaceae; g_; s_                               |
| 4453609 | k_Bacteria; p_Bacteroidetes; c_Bacteroidia; o_Bacteroidales; f_Rikenellaceae; g_; s_                             |
| 356164  | k_Bacteria; p_Bacteroidetes; c_Bacteroidia; o_Bacteroidales; f_Bacteroidaceae; g_Bacteroides; s_acidifaciens     |
| 577170  | k_Bacteria; p_Bacteroidetes; c_Bacteroidia; o_Bacteroidales; f_Bacteroidaceae; g_Bacteroides; s_                 |
| 185125  | k_Bacteria; p_Firmicutes; c_Clostridia; o_Clostridiales; f_Ruminococcaceae; g_Oscillospira; s_                   |
| 185126  | k_Bacteria; p_Firmicutes; c_Clostridia; o_Clostridiales; f_; g_; s_                                              |
| 130663  | k_Bacteria; p_Bacteroidetes; c_Bacteroidia; o_Bacteroidales; f_Bacteroidaceae; g_Bacteroides; s_fragilis         |
| 277200  | k_Bacteria; p_Firmicutes; c_Clostridia; o_Clostridiales; f_Lachnospiraceae; g_; s_                               |
| 4364243 | k_Bacteria; p_Firmicutes; c_Clostridia; o_Clostridiales; f_Lachnospiraceae; g_; s_                               |
| 182470  | k_Bacteria; p_Firmicutes; c_Clostridia; o_Clostridiales; f_; g_; s_                                              |

Table S3 F

| ID      | Taxonomy                                                                                                     |
|---------|--------------------------------------------------------------------------------------------------------------|
| 166718  | k_Bacteria; p_Bacteroidetes; c_Bacteroidia; o_Bacteroidales; f_S24-7; g_; s__                                |
| 176008  | k_Bacteria; p_Firmicutes; c_Clostridia; o_Clostridiales; f_Lachnospiraceae; g_Blautia; s__                   |
| 1106101 | k_Bacteria; p_Bacteroidetes; c_Bacteroidia; o_Bacteroidales; f_S24-7; g_; s__                                |
| 584137  | k_Bacteria; p_Firmicutes; c_Clostridia; o_Clostridiales; f_Lachnospiraceae; g_; s__                          |
| 268384  | k_Bacteria; p_Proteobacteria; c_Gammaproteobacteria; o_Oceanospirillales; f_Halomonadaceae; g_Halomonas; s__ |
| 332608  | k_Bacteria; p_Firmicutes; c_Clostridia; o_Clostridiales; f_Ruminococcaceae; g_Oscillospira; s__              |
| 303251  | k_Bacteria; p_Proteobacteria; c_Deltaproteobacteria; o_Desulfovibrionales; f_Desulfovibrionaceae; g_; s__    |
| 214919  | k_Bacteria; p_Firmicutes; c_Bacilli; o_Turicibacterales; f_Turicibacteraceae; g_Turicibacter; s__            |
| 267388  | k_Bacteria; p_Firmicutes; c_Clostridia; o_Clostridiales; f_; g_; s__                                         |
| 187181  | k_Bacteria; p_Firmicutes; c_Clostridia; o_Clostridiales; f_Ruminococcaceae; g_Ruminococcus; s__              |
| 228556  | k_Bacteria; p_Proteobacteria; c_Gammaproteobacteria; o_Enterobacteriales; f_Enterobacteriaceae; g_; s__      |
| 129990  | k_Bacteria; p_Bacteroidetes; c_Bacteroidia; o_Bacteroidales; f_S24-7; g_; s__                                |
| 271572  | k_Bacteria; p_Firmicutes; c_Clostridia; o_Clostridiales; f_; g_; s__                                         |
| 3197419 | k_Bacteria; p_Firmicutes; c_Clostridia; o_Clostridiales; f_Lachnospiraceae; g_; s__                          |
| 187233  | k_Bacteria; p_Firmicutes; c_Bacilli; o_Lactobacillales; f_Lactobacillaceae; g_Lactobacillus; s__             |
| 420168  | k_Bacteria; p_Firmicutes; c_Clostridia; o_Clostridiales; f_Ruminococcaceae; g_Oscillospira; s__              |
| 189346  | k_Bacteria; p_Firmicutes; c_Clostridia; o_Clostridiales; f_; g_; s__                                         |
| 4472195 | k_Bacteria; p_Firmicutes; c_Clostridia; o_Clostridiales; f_Ruminococcaceae; g_; s__                          |
| 199137  | k_Bacteria; p_Firmicutes; c_Clostridia; o_Clostridiales; f_Lachnospiraceae; g_Coproccoccus; s__              |
| 264294  | k_Bacteria; p_Firmicutes; c_Clostridia; o_Clostridiales; f_; g_; s__                                         |
| 268844  | k_Bacteria; p_Firmicutes; c_Clostridia; o_Clostridiales; f_; g_; s__                                         |
| 179427  | k_Bacteria; p_Bacteroidetes; c_Bacteroidia; o_Bacteroidales; f_S24-7; g_; s__                                |
| 179426  | k_Bacteria; p_Firmicutes; c_Clostridia; o_Clostridiales; f_Lachnospiraceae; g_; s__                          |
| 331411  | k_Bacteria; p_Firmicutes; c_Clostridia; o_Clostridiales; f_; g_; s__                                         |
| 230268  | k_Bacteria; p_Firmicutes; c_Clostridia; o_Clostridiales; f_Ruminococcaceae; g_Ruminococcus; s__              |
| 271439  | k_Bacteria; p_Firmicutes; c_Clostridia; o_Clostridiales; f_; g_; s__                                         |
| 310760  | k_Bacteria; p_Firmicutes; c_Clostridia; o_Clostridiales; f_Lachnospiraceae; g_; s__                          |
| 170335  | k_Bacteria; p_Bacteroidetes; c_Bacteroidia; o_Bacteroidales; f_[Odoribacteraceae]; g_Odoribacter; s__        |
| 189476  | k_Bacteria; p_Firmicutes; c_Clostridia; o_Clostridiales; f_; g_; s__                                         |
