# Supplementary material for: Interplay of host microbiota, genetic perturbations, and inflammation promotes local development of intestinal neoplasms in mice
Source: PubMed Central journal article supplement — J Exp Med. 2014 Mar 10;211(3):457–72. doi: 10.1084/jem.20131587 (PMC3949565; doi:10.1084/jem.20131587), 2014-03-10
Supplement: supp_jem.20131587_JEM_20131587_TableS4.pdf [file supp_jem.20131587_JEM_20131587_TableS4.pdf]

**Table S4.** Statistical analysis of OTUs in Table S3 (for taxonomic information see Table S3)

| ID      | Pr      | FDR     | Bonferroni | Tukey P.A. | Tukey R.A. | Tukey T.A. | Tukey W.A. | Tukey R.P. | Tukey T.P. | Tukey W.P. | Tukey T.R. | Tukey W.R. | Tukey W.T. |
|---------|---------|---------|------------|------------|------------|------------|------------|------------|------------|------------|------------|------------|------------|
| 637546  | 3.1E-39 | 2.2E-36 | 2.2E-36    | 4.4E-13    | 4.4E-13    | 4.4E-13    | 4.4E-13    | 6.4E-01    | 7.6E-01    | 7.9E-01    | 1.0E+00    | 1.0E+00    | 1.0E+00    |
| 10196   | 1.1E-34 | 3.9E-32 | 7.8E-32    | 4.4E-13    | 4.4E-13    | 4.4E-13    | 4.4E-13    | 5.2E-01    | 6.7E-01    | 7.0E-01    | 1.0E+00    | 1.0E+00    | 1.0E+00    |
| 618010  | 2.0E-29 | 4.7E-27 | 1.4E-26    | 4.4E-13    | 4.4E-13    | 4.4E-13    | 4.4E-13    | 2.1E-01    | 3.6E-01    | 4.1E-01    | 1.0E+00    | 1.0E+00    | 1.0E+00    |
| 578058  | 8.8E-28 | 1.6E-25 | 6.2E-25    | 4.4E-13    | 4.4E-13    | 4.4E-13    | 4.4E-13    | 2.4E-01    | 4.0E-01    | 4.5E-01    | 1.0E+00    | 1.0E+00    | 1.0E+00    |
| 192342  | 1.0E-26 | 1.4E-24 | 7.0E-24    | 4.4E-13    | 4.4E-13    | 4.4E-13    | 4.4E-13    | 9.5E-01    | 5.7E-01    | 9.7E-01    | 9.3E-01    | 1.0E+00    | 9.6E-01    |
| 189730  | 1.2E-25 | 1.4E-23 | 8.1E-23    | 4.4E-13    | 5.1E-13    | 1.0E+00    | 4.4E-13    | 1.6E-05    | 4.4E-13    | 9.7E-01    | 3.2E-12    | 1.9E-04    | 4.4E-13    |
| 606063  | 1.5E-25 | 1.5E-23 | 1.1E-22    | 4.4E-13    | 4.4E-13    | 4.4E-13    | 4.4E-13    | 3.1E-01    | 4.8E-01    | 5.2E-01    | 1.0E+00    | 1.0E+00    | 1.0E+00    |
| 243185  | 2.0E-25 | 1.8E-23 | 1.4E-22    | 4.4E-13    | 4.4E-13    | 4.4E-13    | 4.4E-13    | 1.0E+00    | 9.5E-01    | 9.6E-01    | 8.9E-01    | 9.0E-01    | 1.0E+00    |
| 4472195 | 1.0E-24 | 7.9E-23 | 7.1E-22    | 4.4E-13    | 4.4E-13    | 4.4E-13    | 4.6E-13    | 9.5E-01    | 3.7E-02    | 1.4E-01    | 1.4E-02    | 4.6E-01    | 4.9E-04    |
| 786708  | 2.4E-24 | 1.5E-22 | 1.7E-21    | 4.4E-13    | 4.4E-13    | 4.4E-13    | 4.4E-13    | 3.6E-01    | 5.2E-01    | 5.7E-01    | 1.0E+00    | 1.0E+00    | 1.0E+00    |
| 4352471 | 2.4E-24 | 1.5E-22 | 1.7E-21    | 4.4E-13    | 4.4E-13    | 4.4E-13    | 4.4E-13    | 9.9E-02    | 2.1E-01    | 2.6E-01    | 1.0E+00    | 1.0E+00    | 1.0E+00    |
| 311788  | 3.4E-24 | 2.0E-22 | 2.4E-21    | 4.4E-13    | 4.4E-13    | 6.8E-03    | 4.7E-13    | 8.6E-01    | 5.3E-13    | 5.5E-01    | 5.2E-13    | 2.0E-01    | 1.2E-08    |
| 413996  | 4.0E-24 | 2.2E-22 | 2.8E-21    | 4.4E-13    | 4.4E-13    | 7.5E-03    | 4.4E-13    | 1.2E-01    | 4.7E-13    | 1.0E+00    | 9.8E-11    | 4.5E-01    | 2.4E-11    |
| 197623  | 1.6E-23 | 8.2E-22 | 1.1E-20    | 4.4E-13    | 4.4E-13    | 1.0E-01    | 4.4E-13    | 9.8E-01    | 5.9E-13    | 2.4E-01    | 8.3E-13    | 5.3E-01    | 7.5E-13    |
| 350666  | 2.1E-23 | 9.9E-22 | 1.5E-20    | 4.4E-13    | 4.4E-13    | 4.4E-13    | 5.0E-13    | 2.2E-02    | 3.3E-04    | 9.6E-01    | 4.3E-01    | 3.1E-02    | 8.8E-04    |
| 829240  | 2.9E-23 | 1.3E-21 | 2.0E-20    | 4.4E-13    | 4.4E-13    | 4.4E-13    | 4.4E-13    | 4.1E-01    | 5.7E-01    | 6.2E-01    | 1.0E+00    | 1.0E+00    | 1.0E+00    |
| 177952  | 5.3E-23 | 2.2E-21 | 3.7E-20    | 4.4E-13    | 4.5E-13    | 4.4E-13    | 4.5E-13    | 1.1E-04    | 9.9E-01    | 3.8E-01    | 9.2E-03    | 2.9E-01    | 7.4E-01    |
| 569522  | 7.9E-23 | 3.1E-21 | 5.5E-20    | 4.4E-13    | 4.4E-13    | 4.4E-13    | 5.5E-13    | 3.5E-04    | 4.0E-03    | 1.0E+00    | 1.0E+00    | 4.8E-03    | 1.6E-02    |
| 114111  | 1.5E-22 | 5.6E-21 | 1.1E-19    | 4.5E-13    | 6.3E-01    | 9.0E-01    | 2.5E-11    | 4.4E-13    | 4.6E-13    | 1.0E+00    | 1.0E+00    | 5.9E-13    | 1.2E-11    |
| 752584  | 2.0E-22 | 7.0E-21 | 1.4E-19    | 4.4E-13    | 4.4E-13    | 4.4E-13    | 4.4E-13    | 1.5E-01    | 2.8E-01    | 3.3E-01    | 1.0E+00    | 1.0E+00    | 1.0E+00    |
| 2901239 | 2.4E-22 | 7.6E-21 | 1.7E-19    | 9.9E-01    | 1.7E-01    | 4.4E-13    | 8.9E-01    | 2.2E-01    | 4.4E-13    | 9.7E-01    | 4.4E-13    | 8.4E-01    | 4.4E-13    |
| 263518  | 2.4E-22 | 7.6E-21 | 1.7E-19    | 4.4E-13    | 4.4E-13    | 2.6E-01    | 5.2E-13    | 8.6E-01    | 4.7E-13    | 8.8E-01    | 3.6E-12    | 1.0E+00    | 4.6E-10    |
| 2212505 | 2.5E-22 | 7.6E-21 | 1.8E-19    | 4.4E-13    | 4.6E-13    | 1.0E+00    | 4.6E-13    | 9.1E-01    | 4.5E-13    | 6.8E-01    | 5.6E-13    | 3.4E-01    | 5.0E-13    |
| 437137  | 3.8E-22 | 1.1E-20 | 2.6E-19    | 4.4E-13    | 4.2E-12    | 9.9E-01    | 4.6E-11    | 4.4E-04    | 4.4E-13    | 6.0E-02    | 1.5E-11    | 9.3E-01    | 8.9E-11    |
| 263664  | 5.8E-22 | 1.6E-20 | 4.1E-19    | 4.5E-13    | 1.2E-12    | 4.9E-01    | 4.6E-13    | 7.8E-01    | 4.4E-13    | 1.3E-01    | 5.2E-13    | 2.3E-02    | 4.5E-13    |
| 813805  | 7.0E-22 | 1.9E-20 | 4.9E-19    | 4.4E-13    | 4.4E-13    | 4.4E-13    | 4.4E-13    | 2.0E-01    | 2.0E-01    | 2.5E-01    | 1.0E+00    | 1.0E+00    | 1.0E+00    |
| 453896  | 7.5E-22 | 1.9E-20 | 5.2E-19    | 4.4E-13    | 4.4E-13    | 8.6E-02    | 5.8E-11    | 3.8E-01    | 2.5E-12    | 1.5E-01    | 6.1E-13    | 6.9E-03    | 2.8E-06    |
| 278609  | 8.0E-22 | 2.0E-20 | 5.6E-19    | 4.4E-13    | 4.4E-13    | 4.4E-13    | 3.8E-11    | 7.6E-03    | 1.9E-05    | 7.0E-01    | 2.1E-01    | 2.5E-03    | 1.5E-05    |
| 4466618 | 8.3E-22 | 2.0E-20 | 5.9E-19    | 4.4E-13    | 4.4E-13    | 4.4E-13    | 4.4E-13    | 1.3E-01    | 2.6E-01    | 3.1E-01    | 1.0E+00    | 1.0E+00    | 1.0E+00    |
| 304047  | 1.5E-21 | 3.6E-20 | 1.1E-18    | 4.4E-13    | 4.4E-13    | 3.3E-01    | 5.9E-13    | 1.0E+00    | 5.9E-13    | 9.9E-01    | 4.3E-12    | 1.0E+00    | 6.5E-10    |
| 1517779 | 1.7E-21 | 3.8E-20 | 1.2E-18    | 4.4E-13    | 4.5E-13    | 7.3E-01    | 1.1E-12    | 8.2E-01    | 4.7E-13    | 8.8E-01    | 3.5E-12    | 1.0E+00    | 3.8E-10    |
| 4384058 | 1.7E-21 | 3.8E-20 | 1.2E-18    | 4.4E-13    | 4.4E-13    | 4.4E-13    | 4.4E-13    | 1.4E-01    | 2.7E-01    | 3.1E-01    | 1.0E+00    | 1.0E+00    | 1.0E+00    |
| 4314257 | 1.9E-21 | 4.0E-20 | 1.3E-18    | 4.6E-13    | 4.4E-13    | 4.4E-13    | 4.0E-12    | 4.5E-03    | 4.1E-08    | 9.8E-01    | 6.2E-03    | 1.6E-01    | 3.0E-05    |
| 134762  | 2.2E-21 | 4.5E-20 | 1.5E-18    | 4.4E-13    | 4.5E-13    | 9.9E-01    | 4.1E-12    | 1.0E+00    | 4.6E-13    | 9.0E-01    | 6.0E-13    | 9.7E-01    | 1.5E-10    |
| 176008  | 2.7E-21 | 5.3E-20 | 1.9E-18    | 2.8E-02    | 1.5E-12    | 4.4E-13    | 9.9E-01    | 5.3E-10    | 4.4E-13    | 2.2E-01    | 1.1E-05    | 4.4E-10    | 4.5E-13    |
| 174573  | 4.0E-21 | 7.9E-20 | 2.8E-18    | 4.4E-13    | 4.5E-13    | 9.8E-01    | 4.8E-13    | 9.4E-01    | 6.2E-13    | 5.2E-01    | 6.9E-13    | 9.0E-01    | 2.0E-12    |
| 399606  | 8.0E-21 | 1.5E-19 | 5.6E-18    | 1.6E-12    | 4.4E-13    | 4.4E-13    | 6.9E-10    | 4.5E-04    | 1.5E-10    | 9.9E-01    | 4.4E-04    | 4.1E-02    | 2.9E-07    |
| 814952  | 9.0E-21 | 1.7E-19 | 6.3E-18    | 4.4E-13    | 4.4E-13    | 4.4E-13    | 4.4E-13    | 1.8E-01    | 1.5E-01    | 1.8E-01    | 9.9E-01    | 1.0E+00    | 1.0E+00    |
| 390896  | 2.1E-20 | 3.8E-19 | 1.5E-17    | 4.4E-13    | 4.4E-13    | 4.6E-06    | 5.8E-13    | 1.0E+00    | 1.0E-07    | 8.9E-01    | 6.0E-07    | 9.1E-01    | 1.8E-04    |
| 1110752 | 2.4E-20 | 4.2E-19 | 1.7E-17    | 4.4E-13    | 4.4E-13    | 8.9E-02    | 1.2E-12    | 2.2E-01    | 2.2E-10    | 1.0E+00    | 4.3E-12    | 6.3E-01    | 4.1E-08    |
| 176886  | 3.3E-20 | 5.7E-19 | 2.3E-17    | 4.4E-13    | 4.4E-13    | 9.8E-03    | 6.4E-13    | 1.0E+00    | 2.7E-10    | 1.0E+00    | 9.8E-10    | 1.0E+00    | 1.6E-07    |
| 819999  | 3.9E-20 | 6.5E-19 | 2.7E-17    | 4.4E-13    | 4.4E-13    | 4.5E-13    | 4.6E-13    | 3.5E-01    | 5.1E-01    | 5.6E-01    | 1.0E+00    | 1.0E+00    | 1.0E+00    |
| 2897325 | 4.5E-20 | 7.3E-19 | 3.1E-17    | 5.1E-13    | 9.9E-01    | 9.7E-01    | 3.4E-12    | 4.5E-13    | 2.4E-11    | 6.7E-01    | 8.4E-01    | 7.3E-13    | 2.1E-10    |
| 3231096 | 5.3E-20 | 8.4E-19 | 3.7E-17    | 4.4E-13    | 4.4E-13    | 4.0E-02    | 5.6E-13    | 3.9E-01    | 1.2E-09    | 8.4E-01    | 5.1E-11    | 9.9E-01    | 1.4E-08    |
| 259901  | 5.9E-20 | 9.2E-19 | 4.1E-17    | 9.9E-01    | 2.0E-04    | 4.4E-13    | 1.0E+00    | 1.1E-04    | 4.4E-13    | 9.9E-01    | 2.2E-12    | 1.4E-03    | 4.5E-13    |
| 259578  | 6.1E-20 | 9.3E-19 | 4.3E-17    | 1.0E-03    | 3.1E-09    | 4.4E-13    | 2.5E-03    | 4.0E-04    | 4.4E-13    | 9.5E-01    | 9.0E-11    | 6.6E-02    | 1.3E-12    |
| 174791  | 4.0E-19 | 6.0E-18 | 2.8E-16    | 5.5E-13    | 4.3E-12    | 1.0E+00    | 4.7E-13    | 1.0E+00    | 6.8E-12    | 1.7E-02    | 1.3E-10    | 1.9E-02    | 6.9E-13    |
| 277364  | 7.3E-19 | 1.1E-17 | 5.1E-16    | 4.4E-13    | 4.6E-13    | 1.9E-02    | 2.4E-12    | 1.0E+00    | 9.9E-10    | 1.0E+00    | 2.4E-08    | 1.0E+00    | 7.7E-07    |
| 148056  | 1.1E-18 | 1.6E-17 | 8.0E-16    | 4.4E-13    | 4.4E-13    | 4.8E-13    | 5.3E-13    | 8.1E-01    | 8.9E-01    | 9.0E-01    | 1.0E+00    | 1.0E+00    | 1.0E+00    |
| 162639  | 1.3E-18 | 1.8E-17 | 8.9E-16    | 4.5E-13    | 5.5E-11    | 1.0E+00    | 4.5E-10    | 9.6E-02    | 5.2E-13    | 7.4E-01    | 9.6E-10    | 9.3E-01    | 3.4E-09    |

Table S4

| ID      | Pr      | FDR     | Bonferroni | Tukey P.A. | Tukey R.A. | Tukey T.A. | Tukey W.A. | Tukey R.P. | Tukey T.P. | Tukey W.P. | Tukey T.R. | Tukey W.R. | Tukey W.T. |
|---------|---------|---------|------------|------------|------------|------------|------------|------------|------------|------------|------------|------------|------------|
| 635304  | 2.5E-18 | 3.4E-17 | 1.7E-15    | 4.8E-13    | 4.4E-13    | 4.7E-13    | 5.6E-13    | 2.5E-02    | 7.9E-02    | 2.1E-01    | 1.0E+00    | 1.0E+00    | 1.0E+00    |
| 746679  | 2.7E-18 | 3.6E-17 | 1.9E-15    | 7.5E-13    | 4.4E-13    | 4.6E-13    | 2.6E-12    | 6.5E-04    | 4.7E-03    | 3.4E-01    | 1.0E+00    | 5.6E-01    | 6.5E-01    |
| 228556  | 2.8E-18 | 3.7E-17 | 1.9E-15    | 5.9E-13    | 4.4E-13    | 4.7E-13    | 5.1E-13    | 5.4E-03    | 2.5E-02    | 3.6E-02    | 1.0E+00    | 1.0E+00    | 1.0E+00    |
| 813217  | 6.0E-18 | 7.8E-17 | 4.2E-15    | 4.7E-13    | 4.5E-13    | 4.8E-13    | 5.5E-13    | 1.8E-01    | 2.2E-01    | 2.7E-01    | 1.0E+00    | 1.0E+00    | 1.0E+00    |
| 192222  | 6.4E-18 | 8.2E-17 | 4.5E-15    | 7.2E-01    | 1.0E+00    | 5.9E-02    | 4.4E-13    | 6.8E-01    | 3.1E-01    | 4.4E-13    | 4.7E-02    | 4.4E-13    | 1.2E-11    |
| 3267277 | 6.5E-18 | 8.2E-17 | 4.6E-15    | 4.9E-13    | 4.4E-13    | 4.9E-13    | 5.7E-13    | 5.0E-02    | 1.3E-01    | 1.7E-01    | 1.0E+00    | 1.0E+00    | 1.0E+00    |
| 338640  | 7.1E-18 | 8.8E-17 | 5.0E-15    | 7.0E-11    | 5.1E-13    | 4.4E-13    | 2.1E-06    | 1.7E-02    | 2.4E-08    | 8.9E-01    | 1.3E-03    | 1.4E-02    | 2.2E-07    |
| 3390534 | 9.6E-18 | 1.1E-16 | 6.8E-15    | 1.7E-11    | 4.5E-13    | 4.4E-13    | 6.1E-07    | 9.8E-04    | 4.4E-06    | 9.0E-01    | 2.7E-01    | 1.7E-03    | 1.6E-05    |
| 1703712 | 9.6E-18 | 1.1E-16 | 6.8E-15    | 2.7E-10    | 4.5E-13    | 9.6E-01    | 9.3E-09    | 2.0E-05    | 1.2E-07    | 8.5E-01    | 6.1E-13    | 2.5E-02    | 5.9E-07    |
| 4449236 | 1.7E-17 | 2.0E-16 | 1.2E-14    | 7.2E-09    | 1.0E-09    | 4.4E-13    | 2.7E-08    | 6.8E-01    | 5.2E-11    | 6.0E-01    | 2.4E-08    | 1.0E+00    | 2.5E-06    |
| 264802  | 2.4E-17 | 2.8E-16 | 1.7E-14    | 2.4E-01    | 1.2E-07    | 4.5E-13    | 4.6E-01    | 9.3E-06    | 4.5E-13    | 1.0E+00    | 2.3E-07    | 1.1E-03    | 5.7E-12    |
| 4371295 | 2.6E-17 | 3.0E-16 | 1.8E-14    | 4.8E-13    | 3.1E-09    | 1.0E+00    | 6.9E-10    | 5.5E-02    | 9.9E-13    | 9.8E-01    | 2.1E-08    | 4.9E-01    | 2.9E-09    |
| 258411  | 3.0E-17 | 3.4E-16 | 2.1E-14    | 2.0E-03    | 3.1E-09    | 4.4E-13    | 7.8E-07    | 1.8E-04    | 5.1E-13    | 9.1E-03    | 4.7E-07    | 1.0E+00    | 3.5E-06    |
| 189476  | 4.6E-17 | 5.0E-16 | 3.2E-14    | 2.5E-10    | 5.3E-12    | 4.4E-13    | 4.2E-08    | 2.6E-01    | 1.5E-08    | 9.8E-01    | 3.6E-05    | 8.3E-01    | 1.4E-05    |
| 290253  | 5.4E-17 | 5.8E-16 | 3.8E-14    | 7.5E-11    | 4.6E-13    | 4.7E-13    | 4.9E-03    | 1.9E-03    | 1.3E-04    | 1.1E-02    | 7.0E-01    | 7.9E-07    | 1.1E-07    |
| 175077  | 5.6E-17 | 5.9E-16 | 3.9E-14    | 1.0E-02    | 2.2E-10    | 4.5E-13    | 3.6E-05    | 1.3E-06    | 5.7E-13    | 6.0E-02    | 5.9E-05    | 2.6E-01    | 8.2E-07    |
| 324999  | 5.8E-17 | 6.0E-16 | 4.1E-14    | 7.7E-01    | 5.6E-07    | 4.5E-13    | 2.2E-02    | 1.6E-06    | 4.5E-13    | 1.1E-01    | 3.2E-07    | 1.7E-01    | 3.6E-09    |
| 205160  | 5.9E-17 | 6.0E-16 | 4.1E-14    | 7.6E-13    | 4.6E-13    | 1.7E-01    | 3.9E-10    | 1.4E-01    | 1.4E-07    | 1.0E+00    | 6.9E-10    | 5.6E-01    | 5.8E-06    |
| 570367  | 5.8E-17 | 6.0E-16 | 4.1E-14    | 8.4E-12    | 4.5E-13    | 4.7E-13    | 1.7E-08    | 6.3E-04    | 1.5E-03    | 1.0E+00    | 1.0E+00    | 1.5E-02    | 1.5E-02    |
| 261076  | 6.1E-17 | 6.1E-16 | 4.3E-14    | 1.0E+00    | 8.7E-07    | 5.2E-13    | 1.0E+00    | 8.0E-08    | 4.6E-13    | 1.0E+00    | 1.2E-05    | 1.5E-05    | 3.0E-12    |
| 179958  | 7.2E-17 | 7.1E-16 | 5.1E-14    | 6.9E-13    | 1.6E-11    | 1.0E+00    | 4.6E-09    | 1.0E+00    | 9.9E-12    | 9.9E-01    | 3.0E-10    | 1.0E+00    | 3.0E-08    |
| 174420  | 1.1E-16 | 1.1E-15 | 7.8E-14    | 2.9E-04    | 4.6E-13    | 1.0E+00    | 5.0E-01    | 1.3E-10    | 1.4E-03    | 2.2E-01    | 5.6E-13    | 1.6E-10    | 5.7E-01    |
| 174417  | 1.1E-16 | 1.1E-15 | 8.0E-14    | 3.4E-01    | 8.6E-01    | 4.5E-13    | 1.0E+00    | 9.1E-01    | 4.7E-13    | 5.0E-01    | 4.7E-13    | 9.1E-01    | 5.9E-13    |
| 3056461 | 1.3E-16 | 1.2E-15 | 9.2E-14    | 4.5E-13    | 4.7E-13    | 1.7E-07    | 1.1E-12    | 9.9E-01    | 1.8E-02    | 8.6E-01    | 1.3E-02    | 9.8E-01    | 1.0E-02    |
| 4357147 | 2.0E-16 | 1.9E-15 | 1.4E-13    | 1.5E-12    | 4.5E-13    | 3.5E-12    | 3.2E-04    | 9.8E-03    | 4.0E-01    | 8.5E-03    | 8.2E-01    | 2.7E-06    | 5.0E-04    |
| 177068  | 2.1E-16 | 1.9E-15 | 1.5E-13    | 4.6E-13    | 7.9E-12    | 1.9E-01    | 8.7E-10    | 6.9E-01    | 2.3E-09    | 8.9E-01    | 7.8E-07    | 1.0E+00    | 1.0E-05    |
| 4372003 | 2.6E-16 | 2.3E-15 | 1.8E-13    | 4.9E-13    | 7.2E-02    | 1.4E-09    | 2.1E-10    | 1.5E-10    | 8.1E-01    | 1.0E+00    | 4.4E-06    | 4.7E-07    | 9.4E-01    |
| 299171  | 2.9E-16 | 2.6E-15 | 2.0E-13    | 3.0E-01    | 2.6E-06    | 4.6E-13    | 8.8E-01    | 1.7E-04    | 4.8E-13    | 9.7E-01    | 2.1E-07    | 1.0E-03    | 4.9E-12    |
| 332962  | 2.9E-16 | 2.6E-15 | 2.0E-13    | 4.9E-08    | 5.5E-12    | 4.4E-13    | 4.2E-07    | 7.2E-03    | 4.1E-09    | 8.2E-01    | 6.9E-04    | 4.5E-01    | 2.6E-05    |
| 175416  | 3.2E-16 | 2.8E-15 | 2.2E-13    | 4.3E-01    | 5.6E-03    | 4.6E-13    | 1.0E+00    | 1.4E-01    | 4.7E-13    | 5.9E-01    | 8.0E-11    | 2.1E-02    | 6.4E-13    |
| 416043  | 4.0E-16 | 3.4E-15 | 2.8E-13    | 7.8E-11    | 1.3E-12    | 1.0E+00    | 2.9E-09    | 1.7E-01    | 3.1E-09    | 8.2E-01    | 2.9E-11    | 9.5E-01    | 2.6E-08    |
| 313274  | 4.2E-16 | 3.6E-15 | 3.0E-13    | 1.2E-04    | 5.7E-12    | 4.7E-13    | 1.0E-01    | 3.8E-06    | 6.2E-10    | 6.7E-01    | 3.3E-02    | 6.3E-06    | 3.0E-09    |
| 176957  | 4.5E-16 | 3.9E-15 | 3.2E-13    | 4.0E-04    | 3.0E-09    | 4.5E-13    | 1.7E-02    | 1.0E-03    | 3.7E-12    | 1.0E+00    | 7.1E-06    | 1.1E-02    | 1.3E-09    |
| 263420  | 4.7E-16 | 3.9E-15 | 3.3E-13    | 1.6E-12    | 5.4E-13    | 6.2E-01    | 3.7E-06    | 3.5E-01    | 1.4E-08    | 2.5E-01    | 3.9E-10    | 1.2E-02    | 1.2E-03    |
| 198209  | 4.8E-16 | 3.9E-15 | 3.3E-13    | 4.6E-11    | 1.7E-10    | 9.8E-01    | 9.9E-01    | 9.9E-01    | 1.1E-10    | 3.3E-08    | 2.9E-10    | 5.1E-08    | 8.8E-01    |
| 265976  | 6.6E-16 | 5.4E-15 | 4.6E-13    | 6.3E-01    | 1.2E-04    | 4.6E-13    | 4.7E-02    | 1.5E-03    | 4.6E-13    | 3.1E-01    | 4.9E-09    | 7.1E-01    | 2.8E-09    |
| 4342104 | 7.0E-16 | 5.6E-15 | 4.9E-13    | 9.0E-13    | 4.6E-13    | 9.0E-12    | 1.6E-04    | 8.5E-02    | 7.4E-01    | 8.8E-03    | 8.9E-01    | 2.8E-05    | 2.2E-03    |
| 415491  | 7.1E-16 | 5.7E-15 | 5.0E-13    | 1.3E-06    | 4.4E-12    | 4.5E-13    | 2.8E-07    | 2.9E-04    | 3.0E-09    | 3.0E-01    | 6.8E-03    | 4.9E-01    | 2.8E-04    |
| 583266  | 7.4E-16 | 5.9E-15 | 5.2E-13    | 8.9E-03    | 1.4E-09    | 4.6E-13    | 1.2E-01    | 1.3E-05    | 3.7E-12    | 1.0E+00    | 2.6E-04    | 4.6E-04    | 1.1E-09    |
| 174698  | 1.2E-15 | 9.2E-15 | 8.3E-13    | 1.5E-04    | 4.8E-10    | 4.5E-13    | 2.6E-03    | 4.4E-04    | 3.2E-11    | 1.0E+00    | 1.2E-04    | 2.0E-02    | 3.5E-08    |
| 205134  | 1.2E-15 | 9.3E-15 | 8.7E-13    | 1.7E-11    | 5.7E-13    | 7.6E-01    | 2.9E-07    | 1.0E-01    | 6.8E-08    | 9.6E-01    | 2.4E-10    | 9.8E-02    | 6.5E-05    |
| 270391  | 1.2E-15 | 9.3E-15 | 8.6E-13    | 1.2E-12    | 7.0E-10    | 4.5E-01    | 4.5E-12    | 7.3E-01    | 2.8E-08    | 3.2E-01    | 6.3E-06    | 6.2E-02    | 1.0E-08    |
| 312311  | 1.2E-15 | 9.3E-15 | 8.6E-13    | 8.3E-13    | 2.0E-10    | 4.7E-13    | 4.4E-11    | 8.3E-01    | 1.3E-02    | 8.4E-01    | 2.2E-03    | 4.1E-01    | 3.7E-01    |
| 10512   | 1.3E-15 | 9.5E-15 | 9.0E-13    | 2.3E-12    | 1.0E+00    | 1.0E+00    | 5.5E-02    | 7.6E-13    | 2.1E-10    | 2.5E-05    | 1.0E+00    | 4.4E-02    | 1.5E-01    |
| 179547  | 1.3E-15 | 9.5E-15 | 9.0E-13    | 1.8E-12    | 1.3E-12    | 4.7E-13    | 3.4E-09    | 8.0E-01    | 4.6E-03    | 1.0E+00    | 9.4E-02    | 9.3E-01    | 3.8E-02    |
| 828284  | 1.5E-15 | 1.1E-14 | 1.1E-12    | 4.6E-11    | 5.0E-13    | 1.2E-12    | 1.8E-11    | 1.9E-02    | 2.0E-02    | 1.2E-01    | 9.9E-01    | 1.0E+00    | 9.9E-01    |
| 542096  | 1.5E-15 | 1.1E-14 | 1.1E-12    | 2.1E-10    | 4.6E-13    | 7.9E-13    | 1.7E-07    | 7.5E-04    | 3.3E-03    | 1.0E+00    | 1.0E+00    | 2.1E-02    | 3.2E-02    |
| 1931575 | 1.6E-15 | 1.2E-14 | 1.1E-12    | 2.7E-03    | 1.0E+00    | 4.9E-13    | 8.8E-04    | 1.4E-03    | 6.7E-11    | 6.7E-01    | 4.7E-13    | 5.7E-04    | 2.2E-06    |
| 189346  | 1.7E-15 | 1.2E-14 | 1.2E-12    | 5.0E-01    | 3.3E-05    | 4.7E-13    | 3.4E-01    | 7.5E-04    | 4.8E-13    | 9.6E-01    | 6.1E-08    | 8.7E-02    | 2.9E-10    |
| 3610691 | 2.4E-15 | 1.7E-14 | 1.7E-12    | 3.8E-08    | 5.3E-13    | 2.8E-12    | 2.9E-11    | 9.0E-05    | 4.3E-04    | 2.7E-03    | 1.0E+00    | 1.0E+00    | 1.0E+00    |
| 194388  | 2.7E-15 | 1.9E-14 | 1.9E-12    | 6.8E-13    | 4.6E-13    | 7.4E-10    | 2.9E-07    | 1.2E-01    | 1.0E+00    | 4.4E-01    | 1.9E-01    | 9.3E-03    | 7.5E-01    |
| 258849  | 2.7E-15 | 1.9E-14 | 1.9E-12    | 1.6E-11    | 2.5E-11    | 1.0E+00    | 3.0E-08    | 9.5E-01    | 1.3E-09    | 1.0E+00    | 1.1E-09    | 9.8E-01    | 3.8E-07    |

Table S4

| ID      | Pr      | FDR     | Bonferroni | Tukey P.A. | Tukey R.A. | Tukey T.A. | Tukey W.A. | Tukey R.P. | Tukey T.P. | Tukey W.P. | Tukey T.R. | Tukey W.R. | Tukey W.T. |
|---------|---------|---------|------------|------------|------------|------------|------------|------------|------------|------------|------------|------------|------------|
| 569818  | 3.8E-15 | 2.6E-14 | 2.7E-12    | 1.5E-09    | 4.7E-13    | 2.3E-12    | 3.4E-05    | 2.2E-04    | 4.0E-03    | 8.3E-01    | 1.0E+00    | 3.4E-04    | 2.4E-03    |
| 345211  | 3.8E-15 | 2.6E-14 | 2.7E-12    | 1.9E-12    | 7.7E-13    | 5.8E-13    | 7.2E-08    | 6.0E-01    | 4.1E-02    | 9.2E-01    | 5.4E-01    | 3.4E-01    | 2.8E-02    |
| 274297  | 4.1E-15 | 2.7E-14 | 2.9E-12    | 6.7E-11    | 8.1E-13    | 5.1E-13    | 1.0E-08    | 9.8E-02    | 1.1E-03    | 9.7E-01    | 3.5E-01    | 6.8E-01    | 5.3E-02    |
| 198024  | 5.4E-15 | 3.6E-14 | 3.8E-12    | 2.9E-01    | 1.3E-08    | 6.4E-13    | 1.1E-02    | 5.3E-07    | 2.0E-12    | 2.6E-01    | 1.3E-03    | 4.2E-02    | 9.0E-07    |
| 276629  | 5.6E-15 | 3.7E-14 | 3.9E-12    | 6.2E-10    | 6.5E-13    | 9.4E-01    | 1.7E-05    | 1.1E-02    | 3.5E-07    | 8.3E-01    | 8.5E-11    | 6.8E-03    | 6.6E-04    |
| 268844  | 5.9E-15 | 3.8E-14 | 4.1E-12    | 1.2E-01    | 1.1E-09    | 7.9E-13    | 2.8E-02    | 1.8E-07    | 1.4E-11    | 7.1E-01    | 1.4E-02    | 3.1E-03    | 5.1E-07    |
| 183619  | 6.0E-15 | 3.9E-14 | 4.2E-12    | 7.2E-11    | 5.6E-13    | 4.1E-01    | 6.3E-07    | 3.2E-02    | 2.6E-06    | 9.8E-01    | 1.7E-09    | 5.4E-02    | 7.0E-04    |
| 185743  | 7.7E-15 | 4.9E-14 | 5.4E-12    | 3.8E-08    | 1.8E-12    | 9.2E-13    | 6.0E-02    | 2.5E-03    | 7.5E-05    | 3.4E-02    | 5.6E-01    | 4.2E-06    | 2.4E-07    |
| 174004  | 9.2E-15 | 5.8E-14 | 6.5E-12    | 1.4E-11    | 3.1E-12    | 1.7E-01    | 2.1E-10    | 6.3E-01    | 4.9E-06    | 6.1E-01    | 3.4E-07    | 1.0E+00    | 3.2E-06    |
| 176444  | 1.3E-14 | 7.9E-14 | 8.8E-12    | 1.6E-10    | 1.6E-10    | 9.7E-01    | 4.5E-10    | 9.3E-01    | 5.3E-08    | 4.0E-01    | 2.8E-08    | 8.3E-01    | 2.7E-08    |
| 4401580 | 1.5E-14 | 9.1E-14 | 1.0E-11    | 1.9E-10    | 8.4E-13    | 7.0E-01    | 9.0E-04    | 5.1E-02    | 9.5E-07    | 8.8E-02    | 1.1E-09    | 2.8E-04    | 5.5E-02    |
| 274380  | 1.5E-14 | 9.3E-14 | 1.1E-11    | 1.4E-02    | 1.7E-10    | 1.0E-12    | 1.6E-02    | 6.5E-07    | 4.3E-10    | 9.4E-01    | 6.8E-02    | 1.5E-03    | 1.6E-06    |
| 230268  | 1.6E-14 | 9.6E-14 | 1.1E-11    | 3.6E-02    | 1.9E-06    | 5.2E-13    | 7.6E-01    | 3.8E-03    | 8.6E-12    | 7.4E-01    | 5.2E-06    | 1.8E-03    | 1.3E-10    |
| 827487  | 1.6E-14 | 9.9E-14 | 1.1E-11    | 2.0E-10    | 7.3E-13    | 5.8E-12    | 1.8E-10    | 3.8E-02    | 4.1E-02    | 2.3E-01    | 1.0E+00    | 1.0E+00    | 9.8E-01    |
| 4357315 | 1.7E-14 | 1.0E-13 | 1.2E-11    | 1.6E-07    | 1.1E-12    | 7.6E-12    | 1.0E-01    | 2.7E-04    | 4.3E-04    | 4.0E-02    | 9.9E-01    | 8.2E-07    | 1.4E-06    |
| 827592  | 2.0E-14 | 1.2E-13 | 1.4E-11    | 2.5E-02    | 1.1E-05    | 4.8E-13    | 2.5E-01    | 2.8E-02    | 4.0E-12    | 1.0E+00    | 3.0E-07    | 7.1E-02    | 8.6E-10    |
| 179695  | 2.0E-14 | 1.2E-13 | 1.4E-11    | 4.1E-01    | 8.7E-08    | 2.7E-12    | 9.1E-01    | 1.9E-06    | 1.4E-11    | 9.8E-01    | 3.2E-03    | 4.9E-05    | 1.5E-09    |
| 277497  | 2.1E-14 | 1.2E-13 | 1.5E-11    | 3.1E-01    | 2.8E-05    | 6.7E-13    | 9.9E-01    | 2.0E-03    | 2.1E-12    | 8.1E-01    | 2.1E-06    | 1.6E-03    | 5.0E-11    |
| 179548  | 2.2E-14 | 1.3E-13 | 1.6E-11    | 4.3E-09    | 1.9E-11    | 1.0E+00    | 1.7E-07    | 1.2E-01    | 4.7E-08    | 9.3E-01    | 2.2E-10    | 8.0E-01    | 5.6E-07    |
| 161762  | 2.4E-14 | 1.4E-13 | 1.7E-11    | 1.0E-02    | 3.0E-08    | 6.0E-13    | 4.6E-01    | 3.1E-04    | 1.2E-10    | 8.1E-01    | 5.0E-04    | 3.8E-04    | 1.7E-09    |
| 672655  | 2.5E-14 | 1.4E-13 | 1.7E-11    | 8.4E-12    | 7.3E-13    | 3.7E-02    | 1.6E-07    | 2.7E-01    | 4.4E-05    | 9.6E-01    | 4.8E-07    | 2.1E-01    | 6.8E-03    |
| 2897332 | 3.0E-14 | 1.7E-13 | 2.1E-11    | 7.8E-13    | 9.2E-12    | 4.3E-08    | 7.7E-12    | 1.0E+00    | 6.2E-01    | 5.4E-01    | 7.3E-01    | 5.6E-01    | 1.2E-01    |
| 174854  | 3.1E-14 | 1.7E-13 | 2.2E-11    | 1.1E-06    | 8.8E-10    | 5.3E-13    | 1.6E-09    | 5.6E-02    | 4.4E-07    | 9.8E-03    | 4.2E-03    | 8.0E-01    | 1.8E-01    |
| 173916  | 3.1E-14 | 1.8E-13 | 2.2E-11    | 8.2E-01    | 8.2E-01    | 7.2E-13    | 8.3E-02    | 1.0E+00    | 6.1E-13    | 3.1E-01    | 2.7E-12    | 4.1E-01    | 8.5E-08    |
| 192712  | 3.7E-14 | 2.0E-13 | 2.6E-11    | 5.3E-11    | 7.5E-11    | 6.5E-01    | 1.5E-09    | 9.5E-01    | 4.3E-07    | 7.7E-01    | 2.5E-07    | 9.8E-01    | 1.0E-06    |
| 407393  | 3.7E-14 | 2.0E-13 | 2.6E-11    | 1.2E-09    | 7.6E-13    | 6.1E-01    | 8.8E-05    | 1.0E-02    | 8.6E-06    | 6.3E-01    | 1.6E-09    | 2.4E-03    | 1.4E-02    |
| 1871    | 4.2E-14 | 2.3E-13 | 3.0E-11    | 7.0E-02    | 8.7E-12    | 1.0E-09    | 2.8E-01    | 1.6E-09    | 3.0E-07    | 1.0E+00    | 1.0E+00    | 1.3E-06    | 2.1E-05    |
| 421893  | 4.7E-14 | 2.5E-13 | 3.3E-11    | 1.3E-03    | 5.4E-08    | 4.9E-13    | 2.4E-03    | 5.1E-03    | 1.4E-10    | 9.3E-01    | 5.4E-05    | 2.7E-01    | 7.8E-07    |
| 261334  | 5.2E-14 | 2.8E-13 | 3.7E-11    | 2.6E-02    | 2.5E-07    | 1.2E-12    | 9.9E-01    | 8.1E-04    | 3.1E-10    | 2.4E-01    | 5.2E-04    | 3.3E-05    | 1.6E-10    |
| 186742  | 5.8E-14 | 3.1E-13 | 4.1E-11    | 1.9E-06    | 1.0E+00    | 4.8E-11    | 3.0E-07    | 1.1E-06    | 4.1E-04    | 2.7E-01    | 2.8E-11    | 2.4E-07    | 3.4E-01    |
| 209030  | 6.6E-14 | 3.5E-13 | 4.6E-11    | 1.2E-10    | 1.1E-10    | 8.9E-01    | 2.3E-08    | 9.1E-01    | 1.5E-07    | 9.8E-01    | 6.2E-08    | 1.0E+00    | 2.8E-06    |
| 271439  | 6.8E-14 | 3.6E-13 | 4.8E-11    | 1.3E-03    | 4.2E-09    | 2.4E-12    | 9.1E-01    | 4.1E-04    | 2.6E-08    | 9.6E-02    | 2.5E-02    | 3.9E-06    | 1.4E-09    |
| 277388  | 7.3E-14 | 3.8E-13 | 5.2E-11    | 2.5E-08    | 1.1E-11    | 1.1E-11    | 1.9E-01    | 2.3E-02    | 2.7E-03    | 4.9E-03    | 7.9E-01    | 3.4E-06    | 7.0E-07    |
| 342075  | 7.8E-14 | 4.0E-13 | 5.5E-11    | 6.3E-03    | 4.9E-07    | 6.0E-13    | 5.0E-01    | 7.9E-03    | 2.1E-10    | 6.9E-01    | 5.0E-05    | 2.6E-03    | 1.4E-09    |
| 190673  | 8.6E-14 | 4.4E-13 | 6.1E-11    | 1.9E-10    | 1.5E-05    | 1.0E+00    | 3.7E-09    | 6.7E-02    | 1.0E-09    | 7.5E-01    | 2.1E-05    | 2.0E-02    | 6.9E-09    |
| 314424  | 9.0E-14 | 4.6E-13 | 6.3E-11    | 5.5E-02    | 8.0E-05    | 6.2E-13    | 8.7E-01    | 6.3E-02    | 1.8E-11    | 6.8E-01    | 5.4E-07    | 1.4E-02    | 1.7E-10    |
| 304416  | 9.2E-14 | 4.7E-13 | 6.5E-11    | 9.8E-02    | 1.7E-06    | 7.8E-13    | 3.9E-01    | 8.4E-04    | 1.9E-11    | 1.0E+00    | 4.2E-05    | 1.1E-02    | 5.9E-09    |
| 198998  | 1.1E-13 | 5.5E-13 | 7.8E-11    | 5.1E-03    | 9.4E-10    | 1.2E-11    | 7.9E-01    | 1.7E-05    | 4.7E-08    | 3.4E-01    | 1.8E-01    | 3.1E-06    | 1.8E-08    |
| 440840  | 1.1E-13 | 5.5E-13 | 7.7E-11    | 4.0E-04    | 3.8E-11    | 2.6E-12    | 8.5E-04    | 9.5E-06    | 1.0E-07    | 9.2E-01    | 3.2E-01    | 1.1E-02    | 1.5E-04    |
| 324013  | 1.1E-13 | 5.5E-13 | 7.8E-11    | 2.5E-08    | 8.8E-13    | 7.0E-01    | 1.6E-04    | 1.1E-03    | 7.0E-05    | 9.0E-01    | 1.3E-09    | 1.8E-03    | 1.6E-02    |
| 259195  | 1.1E-13 | 5.5E-13 | 7.9E-11    | 4.0E-03    | 1.1E-07    | 1.6E-12    | 9.7E-01    | 3.2E-03    | 4.5E-09    | 1.0E-01    | 1.5E-03    | 2.6E-05    | 3.7E-10    |
| 197099  | 1.2E-13 | 5.7E-13 | 8.3E-11    | 6.9E-06    | 2.1E-09    | 5.3E-13    | 3.3E-03    | 2.8E-02    | 7.5E-08    | 9.7E-01    | 2.1E-03    | 4.1E-02    | 1.4E-06    |
| 261178  | 1.2E-13 | 6.0E-13 | 8.7E-11    | 7.8E-01    | 1.9E-01    | 1.6E-12    | 1.0E+00    | 6.7E-01    | 1.3E-12    | 8.7E-01    | 4.9E-10    | 3.1E-01    | 4.2E-11    |
| 381666  | 1.3E-13 | 6.0E-13 | 8.8E-11    | 2.3E-12    | 1.5E-08    | 3.7E-01    | 1.2E-08    | 3.4E-01    | 1.2E-07    | 1.0E+00    | 1.5E-04    | 7.5E-01    | 3.0E-05    |
| 261132  | 1.3E-13 | 6.1E-13 | 8.9E-11    | 2.6E-05    | 5.7E-09    | 5.2E-13    | 4.6E-04    | 2.2E-02    | 1.5E-08    | 1.0E+00    | 7.1E-04    | 2.7E-01    | 8.5E-06    |
| 192316  | 1.4E-13 | 6.6E-13 | 9.7E-11    | 9.3E-11    | 1.1E-09    | 7.3E-01    | 2.3E-09    | 1.0E+00    | 4.1E-07    | 7.7E-01    | 1.8E-06    | 8.3E-01    | 9.7E-07    |
| 207749  | 1.5E-13 | 6.9E-13 | 1.0E-10    | 2.6E-04    | 1.0E+00    | 9.7E-01    | 5.2E-12    | 1.1E-04    | 9.8E-03    | 2.7E-07    | 9.7E-01    | 2.1E-12    | 3.4E-10    |
| 688800  | 1.9E-13 | 8.9E-13 | 1.3E-10    | 1.2E-01    | 3.7E-10    | 6.2E-10    | 7.8E-01    | 5.1E-08    | 7.2E-08    | 9.2E-01    | 9.1E-01    | 1.4E-06    | 7.2E-07    |
| 174770  | 2.1E-13 | 9.7E-13 | 1.5E-10    | 7.4E-02    | 2.1E-06    | 1.0E-12    | 3.6E-01    | 1.6E-03    | 5.1E-11    | 1.0E+00    | 6.1E-05    | 1.4E-02    | 1.2E-08    |
| 347490  | 2.3E-13 | 1.1E-12 | 1.6E-10    | 4.5E-08    | 1.7E-12    | 5.2E-11    | 1.6E-08    | 1.9E-03    | 7.6E-03    | 2.7E-01    | 1.0E+00    | 7.9E-01    | 7.9E-01    |
| 186549  | 2.4E-13 | 1.1E-12 | 1.7E-10    | 1.0E-04    | 1.1E-09    | 8.2E-13    | 2.4E-03    | 1.6E-03    | 4.5E-08    | 1.0E+00    | 1.5E-02    | 3.8E-02    | 1.0E-05    |
| 274438  | 2.5E-13 | 1.1E-12 | 1.7E-10    | 8.8E-07    | 2.1E-11    | 1.8E-12    | 9.2E-05    | 2.3E-03    | 1.6E-05    | 1.0E+00    | 3.3E-01    | 4.3E-02    | 7.6E-04    |

Table S4

| ID      | Pr      | FDR     | Bonferroni | Tukey P.A. | Tukey R.A. | Tukey T.A. | Tukey W.A. | Tukey R.P. | Tukey T.P. | Tukey W.P. | Tukey T.R. | Tukey W.R. | Tukey W.T. |
|---------|---------|---------|------------|------------|------------|------------|------------|------------|------------|------------|------------|------------|------------|
| 305787  | 2.6E-13 | 1.2E-12 | 1.8E-10    | 1.2E-03    | 5.1E-09    | 9.0E-13    | 4.0E-03    | 5.8E-04    | 5.2E-09    | 9.8E-01    | 6.1E-03    | 5.9E-02    | 6.9E-06    |
| 460953  | 2.7E-13 | 1.2E-12 | 1.9E-10    | 1.3E-05    | 7.5E-12    | 9.9E-01    | 1.9E-02    | 5.8E-05    | 1.6E-05    | 7.8E-01    | 2.8E-11    | 9.2E-05    | 1.2E-02    |
| 385545  | 2.7E-13 | 1.2E-12 | 1.9E-10    | 1.0E-06    | 4.4E-10    | 6.6E-13    | 7.8E-05    | 3.2E-02    | 1.6E-06    | 1.0E+00    | 1.8E-02    | 2.4E-01    | 1.7E-04    |
| 289306  | 3.1E-13 | 1.4E-12 | 2.1E-10    | 5.3E-05    | 8.5E-11    | 2.4E-12    | 7.7E-04    | 2.1E-04    | 6.3E-07    | 1.0E+00    | 2.2E-01    | 2.0E-02    | 1.5E-04    |
| 98048   | 3.4E-13 | 1.5E-12 | 2.4E-10    | 9.0E-06    | 4.9E-08    | 5.2E-13    | 1.9E-04    | 2.1E-01    | 5.1E-08    | 9.9E-01    | 1.4E-04    | 7.2E-01    | 2.4E-05    |
| 2137001 | 3.6E-13 | 1.6E-12 | 2.6E-10    | 9.7E-12    | 1.5E-10    | 2.3E-01    | 4.5E-03    | 1.0E+00    | 1.8E-06    | 2.7E-03    | 7.6E-06    | 5.5E-03    | 5.3E-01    |
| 4453773 | 3.7E-13 | 1.6E-12 | 2.6E-10    | 5.8E-11    | 4.3E-07    | 1.0E+00    | 6.5E-01    | 3.2E-01    | 4.9E-09    | 1.8E-06    | 9.5E-06    | 1.1E-03    | 8.4E-01    |
| 209028  | 3.9E-13 | 1.7E-12 | 2.7E-10    | 5.2E-03    | 1.6E-12    | 7.9E-01    | 4.8E-01    | 6.8E-09    | 2.7E-01    | 6.8E-01    | 1.9E-09    | 5.4E-08    | 9.9E-01    |
| 319219  | 4.1E-13 | 1.8E-12 | 2.9E-10    | 2.4E-03    | 2.0E-04    | 5.2E-13    | 5.5E-03    | 7.3E-01    | 2.0E-10    | 9.6E-01    | 7.0E-08    | 1.0E+00    | 6.8E-07    |
| 136783  | 5.3E-13 | 2.3E-12 | 3.7E-10    | 8.3E-02    | 1.4E-06    | 1.9E-12    | 2.1E-01    | 9.0E-04    | 1.3E-10    | 1.0E+00    | 2.3E-04    | 2.8E-02    | 9.5E-08    |
| 261350  | 5.3E-13 | 2.3E-12 | 3.8E-10    | 7.4E-07    | 8.8E-01    | 8.2E-01    | 3.7E-11    | 1.1E-05    | 4.9E-04    | 3.7E-04    | 1.0E+00    | 2.7E-10    | 1.1E-08    |
| 158302  | 5.6E-13 | 2.4E-12 | 3.9E-10    | 3.1E-01    | 9.0E-01    | 3.2E-12    | 3.3E-03    | 8.5E-01    | 3.1E-11    | 9.9E-02    | 1.6E-11    | 2.2E-02    | 4.6E-05    |
| 177748  | 5.6E-13 | 2.4E-12 | 3.9E-10    | 4.9E-03    | 3.1E-07    | 1.5E-12    | 4.2E-01    | 6.8E-03    | 3.1E-09    | 7.4E-01    | 5.8E-04    | 2.9E-03    | 1.6E-08    |
| 339329  | 5.7E-13 | 2.4E-12 | 4.0E-10    | 8.9E-02    | 4.8E-09    | 2.3E-11    | 2.8E-03    | 1.7E-06    | 2.9E-09    | 2.6E-01    | 1.2E-01    | 7.7E-02    | 3.4E-04    |
| 297577  | 5.9E-13 | 2.4E-12 | 4.1E-10    | 2.7E-06    | 9.3E-08    | 5.6E-13    | 5.1E-06    | 4.9E-01    | 2.9E-07    | 7.2E-01    | 1.5E-04    | 1.0E+00    | 1.0E-03    |
| 194662  | 6.0E-13 | 2.5E-12 | 4.2E-10    | 3.7E-01    | 1.5E-02    | 1.6E-12    | 8.7E-01    | 3.5E-01    | 8.0E-12    | 9.9E-01    | 1.9E-08    | 3.4E-01    | 1.1E-09    |
| 332608  | 6.2E-13 | 2.5E-12 | 4.3E-10    | 3.7E-08    | 2.3E-11    | 9.0E-12    | 2.2E-03    | 3.4E-02    | 1.7E-03    | 4.5E-01    | 6.4E-01    | 2.9E-03    | 1.9E-04    |
| 261590  | 6.6E-13 | 2.7E-12 | 4.7E-10    | 7.8E-08    | 2.2E-07    | 6.6E-01    | 1.0E+00    | 1.0E+00    | 3.9E-09    | 3.5E-06    | 1.0E-08    | 5.2E-06    | 7.2E-01    |
| 182712  | 6.9E-13 | 2.8E-12 | 4.8E-10    | 6.2E-03    | 1.0E+00    | 1.4E-11    | 3.3E-04    | 3.5E-03    | 4.7E-08    | 3.3E-01    | 4.9E-12    | 2.0E-04    | 1.7E-03    |
| 4256470 | 7.1E-13 | 2.8E-12 | 5.0E-10    | 4.5E-11    | 1.3E-02    | 1.0E+00    | 8.8E-07    | 1.1E-05    | 4.8E-09    | 9.4E-01    | 6.7E-02    | 8.9E-03    | 1.1E-05    |
| 181719  | 7.1E-13 | 2.8E-12 | 5.0E-10    | 1.2E-06    | 6.2E-10    | 9.4E-01    | 2.2E-06    | 3.8E-02    | 5.2E-07    | 6.8E-01    | 4.7E-10    | 8.6E-01    | 7.3E-07    |
| 216495  | 7.2E-13 | 2.9E-12 | 5.1E-10    | 3.4E-06    | 6.8E-08    | 7.1E-13    | 3.2E-07    | 4.0E-01    | 7.0E-07    | 2.2E-01    | 4.8E-04    | 9.7E-01    | 1.7E-02    |
| 445144  | 9.1E-13 | 3.6E-12 | 6.4E-10    | 1.0E-08    | 6.3E-11    | 5.7E-01    | 1.8E-08    | 1.6E-01    | 7.2E-05    | 4.7E-01    | 3.4E-07    | 1.0E+00    | 1.4E-05    |
| 318819  | 9.5E-13 | 3.8E-12 | 6.7E-10    | 7.8E-02    | 4.5E-09    | 2.4E-10    | 7.0E-01    | 2.0E-06    | 5.0E-08    | 9.2E-01    | 4.1E-01    | 2.1E-05    | 5.1E-07    |
| 177014  | 9.6E-13 | 3.8E-12 | 6.7E-10    | 8.5E-09    | 9.4E-07    | 9.3E-01    | 1.3E-07    | 9.5E-01    | 5.1E-09    | 8.5E-01    | 3.2E-07    | 5.6E-01    | 4.6E-08    |
| 38278   | 1.0E-12 | 4.0E-12 | 7.3E-10    | 1.4E-06    | 9.2E-12    | 1.0E+00    | 8.5E-04    | 6.3E-04    | 6.1E-05    | 9.9E-01    | 7.4E-10    | 3.7E-03    | 5.9E-03    |
| 175706  | 1.1E-12 | 4.2E-12 | 7.6E-10    | 1.7E-07    | 9.3E-10    | 9.5E-01    | 4.8E-05    | 1.8E-01    | 1.0E-07    | 1.0E+00    | 7.8E-10    | 4.0E-01    | 1.5E-05    |
| 36647   | 1.1E-12 | 4.2E-12 | 7.6E-10    | 1.2E-01    | 1.2E-10    | 2.2E-07    | 9.7E-01    | 1.4E-08    | 4.7E-05    | 6.3E-01    | 8.3E-01    | 7.3E-08    | 2.2E-05    |
| 185036  | 1.2E-12 | 4.5E-12 | 8.3E-10    | 2.3E-10    | 2.7E-07    | 1.0E+00    | 7.0E-06    | 6.4E-01    | 4.2E-09    | 8.5E-01    | 1.8E-06    | 1.0E+00    | 2.1E-05    |
| 183675  | 1.2E-12 | 4.5E-12 | 8.2E-10    | 3.9E-09    | 1.3E-08    | 1.5E-12    | 8.1E-08    | 1.0E+00    | 1.2E-03    | 8.6E-01    | 7.0E-03    | 9.7E-01    | 1.1E-01    |
| 3013444 | 1.2E-12 | 4.5E-12 | 8.3E-10    | 1.3E-08    | 2.2E-09    | 9.9E-01    | 2.3E-04    | 7.3E-01    | 2.6E-08    | 7.7E-01    | 4.2E-09    | 2.6E-01    | 1.4E-04    |
| 276509  | 1.2E-12 | 4.5E-12 | 8.4E-10    | 2.9E-09    | 1.5E-11    | 6.1E-01    | 2.9E-04    | 1.3E-01    | 1.9E-05    | 5.2E-01    | 7.1E-08    | 1.4E-02    | 3.5E-02    |
| 270303  | 1.2E-12 | 4.6E-12 | 8.6E-10    | 5.5E-06    | 1.6E-11    | 2.3E-10    | 4.1E-08    | 3.3E-04    | 8.4E-04    | 4.6E-02    | 1.0E+00    | 9.4E-01    | 8.6E-01    |
| 4329450 | 1.3E-12 | 4.7E-12 | 8.8E-10    | 1.5E-01    | 1.7E-07    | 1.9E-11    | 2.7E-01    | 3.8E-05    | 1.0E-09    | 1.0E+00    | 1.2E-02    | 4.4E-03    | 6.1E-07    |
| 269815  | 1.3E-12 | 4.8E-12 | 9.1E-10    | 1.6E-02    | 2.3E-07    | 3.0E-12    | 1.1E-01    | 1.3E-03    | 2.2E-09    | 1.0E+00    | 1.7E-03    | 2.1E-02    | 5.0E-07    |
| 4416434 | 1.3E-12 | 4.9E-12 | 9.4E-10    | 2.9E-05    | 1.7E-06    | 6.2E-13    | 3.6E-05    | 6.3E-01    | 5.6E-08    | 7.4E-01    | 1.9E-05    | 1.0E+00    | 2.8E-04    |
| 197891  | 1.5E-12 | 5.5E-12 | 1.1E-09    | 1.4E-06    | 4.1E-12    | 5.8E-01    | 1.9E-01    | 2.6E-04    | 3.4E-03    | 6.1E-02    | 2.3E-08    | 1.4E-06    | 9.5E-01    |
| 269125  | 1.6E-12 | 5.9E-12 | 1.1E-09    | 1.2E-08    | 4.5E-11    | 5.3E-09    | 1.3E-10    | 1.2E-01    | 3.8E-01    | 2.2E-02    | 1.0E+00    | 8.1E-01    | 7.5E-01    |
| 4483037 | 1.6E-12 | 5.9E-12 | 1.1E-09    | 1.0E-10    | 1.6E-12    | 1.4E-07    | 1.3E-05    | 1.7E-01    | 1.0E+00    | 6.5E-01    | 2.3E-01    | 3.1E-02    | 8.9E-01    |
| 420168  | 1.9E-12 | 6.8E-12 | 1.3E-09    | 7.4E-01    | 4.0E-05    | 1.1E-10    | 1.0E+00    | 2.5E-04    | 1.9E-10    | 8.3E-01    | 8.6E-04    | 3.7E-04    | 2.8E-09    |
| 452014  | 2.4E-12 | 8.6E-12 | 1.7E-09    | 9.7E-03    | 3.0E-09    | 5.5E-09    | 1.0E+00    | 2.7E-05    | 2.2E-05    | 3.7E-02    | 9.4E-01    | 1.1E-07    | 9.7E-08    |
| 348785  | 2.4E-12 | 8.6E-12 | 1.7E-09    | 1.5E-01    | 7.2E-05    | 1.0E-11    | 9.8E-01    | 1.8E-02    | 5.1E-10    | 6.4E-01    | 5.0E-05    | 3.9E-03    | 2.2E-09    |
| 4401375 | 2.4E-12 | 8.7E-12 | 1.7E-09    | 2.0E-12    | 1.9E-09    | 4.2E-09    | 4.0E-05    | 6.9E-01    | 1.0E+00    | 6.5E-02    | 9.5E-01    | 5.4E-01    | 2.6E-01    |
| 271418  | 2.5E-12 | 8.9E-12 | 1.8E-09    | 1.6E-06    | 2.1E-10    | 8.3E-01    | 1.0E-08    | 1.2E-02    | 8.5E-04    | 3.4E-02    | 1.9E-07    | 1.0E+00    | 2.1E-06    |
| 299858  | 3.1E-12 | 1.1E-11 | 2.2E-09    | 3.6E-05    | 7.3E-09    | 3.7E-12    | 1.4E-02    | 2.1E-02    | 1.6E-06    | 9.4E-01    | 2.5E-02    | 2.4E-02    | 1.1E-05    |
| 178490  | 3.3E-12 | 1.2E-11 | 2.3E-09    | 6.4E-08    | 9.1E-01    | 3.2E-08    | 1.6E-07    | 6.8E-07    | 4.6E-01    | 6.2E-01    | 2.5E-07    | 1.3E-06    | 1.0E+00    |
| 174056  | 3.7E-12 | 1.3E-11 | 2.6E-09    | 2.3E-07    | 5.0E-10    | 8.1E-01    | 1.5E-08    | 9.9E-02    | 2.0E-04    | 1.3E-01    | 4.8E-07    | 1.0E+00    | 3.4E-06    |
| 436341  | 4.0E-12 | 1.4E-11 | 2.8E-09    | 2.4E-03    | 6.1E-06    | 1.5E-12    | 4.7E-02    | 1.4E-01    | 6.6E-09    | 1.0E+00    | 4.6E-05    | 2.8E-01    | 7.4E-07    |
| 263171  | 4.0E-12 | 1.4E-11 | 2.8E-09    | 6.3E-01    | 2.6E-04    | 7.9E-11    | 1.0E+00    | 3.4E-03    | 2.3E-10    | 7.5E-01    | 1.2E-04    | 1.7E-03    | 2.1E-09    |
| 198964  | 4.0E-12 | 1.4E-11 | 2.8E-09    | 6.9E-09    | 4.0E-11    | 3.9E-09    | 2.5E-09    | 1.5E-01    | 4.0E-01    | 2.2E-01    | 1.0E+00    | 1.0E+00    | 1.0E+00    |
| 269726  | 4.6E-12 | 1.6E-11 | 3.3E-09    | 4.0E-07    | 8.7E-10    | 1.0E+00    | 8.5E-07    | 1.0E-01    | 1.0E-05    | 6.6E-01    | 2.6E-08    | 9.7E-01    | 7.3E-06    |
| 135956  | 5.2E-12 | 1.8E-11 | 3.7E-09    | 2.1E-01    | 1.1E-10    | 4.1E-07    | 4.2E-02    | 4.4E-09    | 3.6E-05    | 6.7E-01    | 7.4E-01    | 3.2E-04    | 2.9E-02    |

Table S4

| ID      | Pr      | FDR     | Bonferroni | Tukey P.A. | Tukey R.A. | Tukey T.A. | Tukey W.A. | Tukey R.P. | Tukey T.P. | Tukey W.P. | Tukey T.R. | Tukey W.R. | Tukey W.T. |
|---------|---------|---------|------------|------------|------------|------------|------------|------------|------------|------------|------------|------------|------------|
| 129394  | 5.4E-12 | 1.8E-11 | 3.8E-09    | 1.7E-01    | 9.3E-01    | 1.7E-11    | 9.1E-01    | 5.9E-01    | 7.1E-10    | 8.5E-01    | 7.7E-11    | 1.0E+00    | 9.7E-09    |
| 4374042 | 5.4E-12 | 1.8E-11 | 3.8E-09    | 7.3E-03    | 1.2E-10    | 2.4E-08    | 4.5E-01    | 1.0E-06    | 1.4E-04    | 7.7E-01    | 9.9E-01    | 4.1E-06    | 1.1E-04    |
| 833381  | 5.4E-12 | 1.8E-11 | 3.8E-09    | 1.0E-02    | 5.3E-08    | 8.9E-11    | 7.1E-01    | 5.3E-04    | 2.3E-07    | 5.6E-01    | 8.0E-02    | 1.5E-04    | 2.0E-07    |
| 4327763 | 5.8E-12 | 1.9E-11 | 4.1E-09    | 1.9E-01    | 6.7E-03    | 3.7E-12    | 6.9E-03    | 4.0E-01    | 9.2E-11    | 2.7E-01    | 1.5E-07    | 9.8E-01    | 2.4E-05    |
| 345582  | 5.8E-12 | 1.9E-11 | 4.1E-09    | 3.9E-01    | 4.7E-07    | 2.6E-10    | 5.0E-01    | 1.5E-05    | 3.2E-09    | 1.0E+00    | 4.5E-02    | 2.5E-03    | 1.6E-06    |
| 259699  | 5.9E-12 | 1.9E-11 | 4.1E-09    | 1.1E-10    | 1.8E-09    | 3.9E-10    | 3.2E-08    | 1.0E+00    | 5.9E-01    | 9.9E-01    | 6.4E-01    | 9.9E-01    | 9.3E-01    |
| 3172943 | 6.4E-12 | 2.1E-11 | 4.5E-09    | 2.5E-09    | 4.8E-11    | 1.8E-01    | 3.4E-06    | 2.9E-01    | 4.0E-04    | 1.0E+00    | 4.7E-06    | 4.3E-01    | 1.0E-02    |
| 175213  | 7.2E-12 | 2.4E-11 | 5.1E-09    | 8.1E-04    | 6.9E-05    | 2.4E-12    | 4.8E-06    | 7.3E-01    | 4.3E-08    | 7.3E-02    | 9.6E-06    | 5.3E-01    | 1.1E-02    |
| 2624257 | 7.6E-12 | 2.5E-11 | 5.3E-09    | 4.7E-11    | 2.2E-07    | 7.4E-01    | 1.7E-04    | 4.0E-01    | 2.0E-07    | 1.4E-01    | 1.7E-04    | 9.1E-01    | 1.4E-02    |
| 1992    | 7.9E-12 | 2.6E-11 | 5.5E-09    | 4.7E-09    | 4.5E-10    | 7.7E-01    | 2.4E-02    | 6.0E-01    | 1.0E-05    | 2.7E-02    | 5.9E-07    | 1.9E-03    | 3.5E-01    |
| 261486  | 9.4E-12 | 3.1E-11 | 6.6E-09    | 1.3E-02    | 6.5E-06    | 6.2E-12    | 1.7E-01    | 3.6E-02    | 7.5E-09    | 1.0E+00    | 2.5E-04    | 8.9E-02    | 5.0E-07    |
| 4402077 | 1.1E-11 | 3.4E-11 | 7.5E-09    | 5.9E-01    | 1.6E-07    | 1.2E-08    | 9.9E-01    | 1.2E-06    | 8.0E-08    | 9.5E-01    | 5.5E-01    | 2.0E-05    | 1.0E-06    |
| 4366524 | 1.1E-11 | 3.4E-11 | 7.6E-09    | 1.7E-01    | 1.7E-06    | 5.2E-10    | 1.0E+00    | 3.4E-04    | 3.4E-08    | 4.7E-01    | 3.3E-02    | 6.9E-05    | 2.8E-08    |
| 1106468 | 1.1E-11 | 3.5E-11 | 7.6E-09    | 1.1E-07    | 2.5E-09    | 1.2E-08    | 1.6E-10    | 3.7E-01    | 2.3E-01    | 6.1E-03    | 9.9E-01    | 2.9E-01    | 6.6E-01    |
| 4343528 | 1.1E-11 | 3.6E-11 | 7.9E-09    | 3.5E-05    | 3.2E-08    | 1.2E-11    | 1.5E-06    | 6.9E-02    | 7.1E-06    | 1.8E-01    | 2.5E-02    | 1.0E+00    | 7.8E-02    |
| 322839  | 1.4E-11 | 4.5E-11 | 1.0E-08    | 1.7E-10    | 1.9E-05    | 5.0E-01    | 9.2E-01    | 5.5E-02    | 3.3E-06    | 5.0E-07    | 1.9E-02    | 3.2E-03    | 9.6E-01    |
| 184209  | 1.5E-11 | 4.7E-11 | 1.1E-08    | 2.9E-10    | 4.9E-10    | 3.6E-02    | 3.6E-02    | 9.7E-01    | 9.1E-04    | 2.6E-03    | 4.5E-04    | 1.2E-03    | 1.0E+00    |
| 301233  | 1.5E-11 | 4.8E-11 | 1.1E-08    | 4.3E-02    | 6.2E-06    | 2.0E-11    | 2.7E-01    | 9.3E-03    | 6.7E-09    | 1.0E+00    | 8.3E-04    | 4.8E-02    | 6.8E-07    |
| 353073  | 1.7E-11 | 5.2E-11 | 1.2E-08    | 1.8E-07    | 4.4E-12    | 2.5E-02    | 1.1E-03    | 1.8E-03    | 1.1E-01    | 8.2E-01    | 1.1E-05    | 1.6E-03    | 8.1E-01    |
| 4378081 | 1.7E-11 | 5.4E-11 | 1.2E-08    | 8.8E-10    | 9.9E-01    | 1.6E-01    | 8.2E-04    | 1.2E-09    | 2.0E-04    | 2.0E-01    | 3.0E-01    | 1.9E-03    | 3.3E-01    |
| 344527  | 1.8E-11 | 5.7E-11 | 1.3E-08    | 3.5E-05    | 2.2E-10    | 4.1E-10    | 1.6E-03    | 8.5E-04    | 3.2E-04    | 1.0E+00    | 9.1E-01    | 2.0E-02    | 5.5E-03    |
| 635059  | 1.9E-11 | 5.9E-11 | 1.3E-08    | 5.8E-02    | 9.3E-01    | 5.6E-11    | 9.6E-01    | 2.8E-01    | 1.5E-08    | 4.9E-01    | 2.6E-10    | 1.0E+00    | 1.6E-08    |
| 655793  | 2.0E-11 | 6.3E-11 | 1.4E-08    | 2.1E-02    | 3.0E-07    | 6.1E-11    | 1.1E-04    | 1.3E-03    | 6.1E-08    | 8.2E-02    | 2.1E-02    | 9.6E-01    | 1.2E-02    |
| 4352747 | 2.1E-11 | 6.4E-11 | 1.5E-08    | 9.6E-09    | 2.9E-07    | 9.0E-01    | 3.5E-08    | 1.0E+00    | 5.9E-06    | 6.1E-01    | 6.2E-05    | 5.0E-01    | 3.6E-06    |
| 214715  | 2.1E-11 | 6.4E-11 | 1.5E-08    | 2.3E-06    | 2.0E-09    | 1.0E+00    | 1.2E-05    | 5.9E-02    | 2.0E-05    | 8.8E-01    | 2.6E-08    | 7.5E-01    | 4.4E-05    |
| 191218  | 2.3E-11 | 6.9E-11 | 1.6E-08    | 9.1E-06    | 2.5E-03    | 6.1E-02    | 7.8E-01    | 6.5E-01    | 9.4E-10    | 1.7E-06    | 4.2E-07    | 2.6E-04    | 6.4E-01    |
| 827195  | 2.3E-11 | 7.0E-11 | 1.6E-08    | 2.4E-10    | 5.1E-08    | 6.5E-02    | 5.6E-01    | 9.1E-01    | 3.3E-04    | 1.1E-05    | 7.5E-03    | 3.4E-04    | 8.5E-01    |
| 169428  | 2.4E-11 | 7.3E-11 | 1.7E-08    | 3.8E-03    | 6.6E-11    | 7.0E-08    | 8.9E-03    | 1.2E-06    | 8.0E-04    | 9.7E-01    | 9.1E-01    | 1.5E-03    | 3.9E-02    |
| 724472  | 2.4E-11 | 7.3E-11 | 1.7E-08    | 4.4E-01    | 3.0E-01    | 4.2E-11    | 9.4E-01    | 9.9E-01    | 3.1E-10    | 9.7E-01    | 9.8E-09    | 8.9E-01    | 1.6E-08    |
| 4327628 | 2.6E-11 | 7.6E-11 | 1.8E-08    | 1.4E-05    | 1.3E-10    | 5.6E-09    | 3.3E-07    | 1.2E-03    | 8.1E-03    | 1.2E-01    | 1.0E+00    | 9.2E-01    | 9.4E-01    |
| 234121  | 2.6E-11 | 7.7E-11 | 1.8E-08    | 8.9E-01    | 1.6E-01    | 6.8E-11    | 2.8E-01    | 4.5E-01    | 4.0E-11    | 6.2E-01    | 5.5E-08    | 1.0E+00    | 1.9E-06    |
| 198865  | 2.6E-11 | 7.7E-11 | 1.8E-08    | 2.6E-09    | 1.3E-11    | 1.9E-05    | 1.2E-06    | 1.3E-01    | 8.4E-01    | 1.0E+00    | 4.4E-02    | 4.0E-01    | 9.0E-01    |
| 261992  | 2.6E-11 | 7.7E-11 | 1.8E-08    | 2.0E-11    | 8.9E-06    | 1.2E-06    | 1.1E-08    | 2.0E-02    | 6.5E-01    | 1.0E+00    | 7.3E-01    | 6.0E-02    | 6.2E-01    |
| 334697  | 2.7E-11 | 7.9E-11 | 1.9E-08    | 8.5E-02    | 7.4E-02    | 1.1E-11    | 5.5E-03    | 1.0E+00    | 1.3E-09    | 4.0E-01    | 2.6E-08    | 6.2E-01    | 8.6E-05    |
| 288128  | 2.9E-11 | 8.4E-11 | 2.0E-08    | 3.0E-04    | 3.0E-08    | 3.1E-11    | 2.1E-04    | 1.2E-02    | 2.8E-06    | 7.3E-01    | 5.4E-02    | 6.3E-01    | 4.5E-03    |
| 2877100 | 3.1E-11 | 9.1E-11 | 2.2E-08    | 8.1E-05    | 2.9E-07    | 1.5E-11    | 7.2E-06    | 1.8E-01    | 4.3E-06    | 3.0E-01    | 6.8E-03    | 1.0E+00    | 3.4E-02    |
| 191948  | 3.3E-11 | 9.5E-11 | 2.3E-08    | 3.1E-05    | 5.4E-01    | 5.2E-01    | 2.0E-04    | 1.6E-08    | 3.7E-07    | 9.6E-01    | 1.0E+00    | 9.2E-07    | 3.9E-06    |
| 578649  | 3.6E-11 | 1.0E-10 | 2.6E-08    | 6.4E-06    | 2.2E-10    | 7.8E-10    | 3.3E-04    | 4.1E-03    | 2.4E-03    | 1.0E+00    | 9.6E-01    | 7.0E-02    | 3.0E-02    |
| 271572  | 3.7E-11 | 1.0E-10 | 2.6E-08    | 1.6E-01    | 8.2E-04    | 4.8E-11    | 8.6E-01    | 1.2E-01    | 2.5E-09    | 9.1E-01    | 2.4E-05    | 7.0E-02    | 4.1E-08    |
| 270382  | 3.8E-11 | 1.1E-10 | 2.6E-08    | 6.1E-05    | 2.3E-09    | 1.0E+00    | 9.8E-01    | 4.9E-03    | 3.6E-04    | 4.7E-03    | 2.9E-08    | 7.0E-07    | 9.9E-01    |
| 176071  | 3.8E-11 | 1.1E-10 | 2.6E-08    | 3.7E-06    | 1.2E-10    | 9.0E-01    | 2.0E-02    | 3.8E-03    | 8.8E-04    | 6.0E-01    | 5.9E-08    | 8.7E-04    | 2.1E-01    |
| 47477   | 4.1E-11 | 1.2E-10 | 2.9E-08    | 4.2E-02    | 7.0E-02    | 2.5E-11    | 9.2E-01    | 1.0E+00    | 9.1E-09    | 5.4E-01    | 6.8E-08    | 5.8E-01    | 1.4E-08    |
| 267958  | 4.3E-11 | 1.2E-10 | 3.0E-08    | 8.4E-01    | 2.3E-09    | 9.7E-02    | 9.9E-01    | 1.6E-09    | 3.3E-01    | 6.2E-01    | 3.9E-04    | 1.3E-08    | 6.0E-02    |
| 1106683 | 4.3E-11 | 1.2E-10 | 3.0E-08    | 1.5E-02    | 8.1E-04    | 7.2E-12    | 1.2E-02    | 6.2E-01    | 7.7E-09    | 9.0E-01    | 3.3E-06    | 1.0E+00    | 2.4E-05    |
| 183089  | 4.5E-11 | 1.3E-10 | 3.2E-08    | 6.5E-07    | 8.8E-05    | 8.7E-01    | 8.8E-01    | 8.7E-01    | 1.3E-07    | 4.2E-07    | 1.2E-05    | 2.6E-05    | 1.0E+00    |
| 170926  | 4.6E-11 | 1.3E-10 | 3.2E-08    | 1.1E-01    | 5.4E-03    | 7.1E-11    | 1.0E+00    | 5.3E-01    | 7.6E-09    | 3.8E-01    | 5.1E-06    | 4.3E-02    | 5.1E-09    |
| 4448052 | 4.6E-11 | 1.3E-10 | 3.2E-08    | 2.0E-06    | 5.1E-09    | 2.3E-09    | 4.4E-01    | 1.2E-01    | 1.4E-02    | 1.8E-02    | 7.8E-01    | 1.0E-04    | 1.5E-05    |
| 210292  | 4.7E-11 | 1.3E-10 | 3.3E-08    | 3.5E-09    | 1.1E-08    | 3.6E-10    | 9.4E-07    | 1.0E+00    | 1.6E-01    | 1.0E+00    | 3.6E-01    | 1.0E+00    | 4.6E-01    |
| 206817  | 5.0E-11 | 1.4E-10 | 3.5E-08    | 7.4E-04    | 4.7E-11    | 8.2E-01    | 1.5E-02    | 5.9E-06    | 7.8E-02    | 1.0E+00    | 5.2E-08    | 5.8E-04    | 2.4E-01    |
| 180465  | 5.2E-11 | 1.4E-10 | 3.7E-08    | 2.2E-01    | 3.9E-06    | 4.6E-10    | 5.7E-01    | 5.2E-04    | 2.0E-08    | 1.0E+00    | 1.8E-02    | 8.2E-03    | 1.9E-06    |
| 180879  | 5.7E-11 | 1.5E-10 | 4.0E-08    | 2.3E-07    | 8.2E-09    | 1.1E-10    | 4.3E-06    | 4.7E-01    | 4.8E-03    | 9.5E-01    | 2.3E-01    | 9.8E-01    | 1.5E-01    |
| 4457427 | 5.8E-11 | 1.6E-10 | 4.1E-08    | 8.5E-01    | 2.8E-04    | 1.3E-09    | 9.9E-01    | 9.8E-04    | 1.5E-09    | 1.0E+00    | 1.6E-03    | 8.2E-03    | 1.4E-07    |

Table S4

| ID      | Pr      | FDR     | Bonferroni | Tukey P.A. | Tukey R.A. | Tukey T.A. | Tukey W.A. | Tukey R.P. | Tukey T.P. | Tukey W.P. | Tukey T.R. | Tukey W.R. | Tukey W.T. |
|---------|---------|---------|------------|------------|------------|------------|------------|------------|------------|------------|------------|------------|------------|
| 72820   | 6.5E-11 | 1.8E-10 | 4.6E-08    | 2.1E-05    | 1.0E+00    | 1.0E+00    | 2.3E-07    | 3.4E-06    | 3.6E-05    | 7.4E-02    | 1.0E+00    | 5.9E-08    | 3.5E-07    |
| 661055  | 6.6E-11 | 1.8E-10 | 4.6E-08    | 3.7E-01    | 1.0E+00    | 7.2E-09    | 1.6E-05    | 5.3E-01    | 1.5E-07    | 5.7E-04    | 8.6E-09    | 2.5E-05    | 4.5E-01    |
| 176760  | 6.7E-11 | 1.8E-10 | 4.7E-08    | 3.3E-08    | 4.6E-09    | 8.3E-01    | 1.7E-05    | 7.0E-01    | 3.3E-05    | 1.0E+00    | 3.1E-06    | 8.1E-01    | 1.4E-03    |
| 3325760 | 6.7E-11 | 1.8E-10 | 4.7E-08    | 6.7E-01    | 9.6E-03    | 2.3E-10    | 9.8E-01    | 9.6E-02    | 6.1E-10    | 9.8E-01    | 8.7E-06    | 1.3E-01    | 3.9E-08    |
| 423455  | 7.6E-11 | 2.0E-10 | 5.3E-08    | 2.4E-08    | 4.2E-07    | 9.0E-01    | 1.5E-07    | 1.0E+00    | 1.3E-05    | 7.4E-01    | 8.7E-05    | 7.0E-01    | 1.3E-05    |
| 628218  | 7.6E-11 | 2.0E-10 | 5.4E-08    | 2.4E-01    | 3.6E-01    | 7.9E-11    | 5.4E-03    | 1.0E+00    | 2.2E-09    | 1.9E-01    | 1.4E-08    | 2.2E-01    | 4.8E-04    |
| 203605  | 7.7E-11 | 2.0E-10 | 5.4E-08    | 3.4E-07    | 2.3E-10    | 1.7E-08    | 3.4E-07    | 4.4E-02    | 1.7E-01    | 5.2E-01    | 1.0E+00    | 9.5E-01    | 9.9E-01    |
| 174768  | 7.8E-11 | 2.1E-10 | 5.5E-08    | 7.1E-02    | 8.1E-01    | 3.3E-10    | 1.0E+00    | 5.2E-01    | 8.3E-08    | 1.1E-01    | 4.5E-09    | 7.9E-01    | 4.3E-09    |
| 584137  | 8.1E-11 | 2.1E-10 | 5.7E-08    | 5.6E-10    | 2.1E-06    | 4.1E-04    | 8.4E-10    | 4.0E-01    | 1.4E-01    | 3.4E-01    | 9.3E-01    | 2.4E-02    | 7.6E-03    |
| 1107303 | 8.4E-11 | 2.2E-10 | 5.9E-08    | 8.2E-03    | 9.4E-01    | 5.8E-10    | 1.2E-04    | 5.4E-02    | 2.3E-06    | 1.6E-01    | 2.9E-09    | 7.0E-04    | 5.1E-02    |
| 113417  | 8.6E-11 | 2.3E-10 | 6.1E-08    | 1.3E-07    | 8.2E-09    | 9.9E-01    | 1.2E-01    | 5.7E-01    | 1.2E-05    | 3.0E-02    | 6.0E-07    | 1.9E-03    | 3.6E-01    |
| 306699  | 9.5E-11 | 2.5E-10 | 6.7E-08    | 2.7E-02    | 7.4E-07    | 8.5E-09    | 1.0E+00    | 2.2E-03    | 1.0E-05    | 8.2E-02    | 2.8E-01    | 1.3E-05    | 1.4E-07    |
| 191616  | 1.0E-10 | 2.6E-10 | 7.0E-08    | 2.9E-07    | 8.8E-10    | 6.5E-08    | 2.4E-01    | 1.3E-01    | 3.7E-01    | 1.8E-02    | 1.0E+00    | 1.0E-04    | 8.9E-04    |
| 130335  | 1.0E-10 | 2.6E-10 | 7.0E-08    | 6.9E-02    | 8.4E-01    | 1.1E-10    | 4.4E-01    | 4.8E-01    | 2.5E-08    | 9.9E-01    | 1.2E-09    | 9.1E-01    | 1.1E-06    |
| 278712  | 1.0E-10 | 2.7E-10 | 7.3E-08    | 1.2E-05    | 1.5E-11    | 3.5E-02    | 2.1E-03    | 1.4E-04    | 5.0E-01    | 1.0E+00    | 2.3E-05    | 2.2E-03    | 8.4E-01    |
| 1902400 | 1.1E-10 | 2.9E-10 | 7.9E-08    | 1.4E-08    | 1.2E-07    | 3.1E-08    | 2.4E-09    | 1.0E+00    | 6.8E-01    | 1.5E-01    | 7.5E-01    | 2.2E-01    | 9.0E-01    |
| 279026  | 1.2E-10 | 3.0E-10 | 8.3E-08    | 6.5E-07    | 4.5E-10    | 1.3E-08    | 6.2E-07    | 4.7E-02    | 1.1E-01    | 5.3E-01    | 1.0E+00    | 9.5E-01    | 9.6E-01    |
| 260346  | 1.2E-10 | 3.1E-10 | 8.5E-08    | 5.3E-02    | 2.8E-06    | 1.6E-09    | 3.0E-06    | 3.4E-03    | 7.5E-07    | 1.6E-03    | 5.5E-02    | 9.0E-01    | 5.0E-01    |
| 264325  | 1.2E-10 | 3.1E-10 | 8.5E-08    | 2.1E-06    | 1.1E-06    | 1.0E+00    | 2.6E-07    | 9.4E-01    | 8.9E-06    | 2.4E-01    | 3.9E-06    | 6.5E-01    | 6.7E-07    |
| 199698  | 1.4E-10 | 3.4E-10 | 9.6E-08    | 1.6E-07    | 7.3E-10    | 6.6E-08    | 6.7E-08    | 1.6E-01    | 4.6E-01    | 3.4E-01    | 1.0E+00    | 1.0E+00    | 1.0E+00    |
| 95424   | 1.5E-10 | 3.7E-10 | 1.0E-07    | 7.1E-06    | 3.1E-10    | 1.4E-08    | 1.2E-05    | 5.0E-03    | 2.6E-02    | 7.3E-01    | 1.0E+00    | 4.9E-01    | 6.1E-01    |
| 174441  | 1.5E-10 | 3.7E-10 | 1.0E-07    | 1.0E-04    | 1.5E-06    | 2.9E-11    | 1.1E-03    | 3.8E-01    | 7.3E-06    | 9.9E-01    | 3.6E-03    | 8.5E-01    | 9.7E-04    |
| 4450025 | 1.5E-10 | 3.8E-10 | 1.1E-07    | 5.9E-03    | 4.1E-01    | 7.2E-11    | 4.2E-01    | 4.0E-01    | 3.3E-07    | 7.7E-01    | 9.2E-09    | 1.0E+00    | 8.2E-07    |
| 197600  | 1.5E-10 | 3.8E-10 | 1.1E-07    | 1.7E-05    | 9.3E-06    | 2.1E-11    | 1.2E-02    | 9.5E-01    | 2.6E-05    | 9.0E-01    | 6.2E-04    | 6.4E-01    | 6.2E-05    |
| 195433  | 1.6E-10 | 3.9E-10 | 1.1E-07    | 1.1E-01    | 7.2E-05    | 1.6E-10    | 3.0E-01    | 2.5E-02    | 1.8E-08    | 1.0E+00    | 7.3E-04    | 1.6E-01    | 3.5E-06    |
| 199674  | 1.6E-10 | 4.0E-10 | 1.2E-07    | 4.7E-01    | 5.1E-05    | 8.2E-10    | 3.6E-01    | 1.4E-03    | 7.5E-09    | 9.7E-01    | 4.2E-03    | 1.0E-01    | 1.0E-05    |
| 192971  | 1.7E-10 | 4.2E-10 | 1.2E-07    | 9.5E-07    | 1.0E+00    | 9.9E-01    | 7.5E-05    | 1.8E-07    | 2.0E-06    | 1.0E+00    | 1.0E+00    | 3.1E-05    | 6.8E-05    |
| 2315700 | 1.7E-10 | 4.3E-10 | 1.2E-07    | 5.0E-08    | 3.0E-10    | 6.5E-08    | 2.3E-06    | 1.8E-01    | 6.3E-01    | 9.8E-01    | 9.9E-01    | 7.7E-01    | 9.7E-01    |
| 196856  | 1.8E-10 | 4.5E-10 | 1.3E-07    | 6.2E-07    | 3.2E-03    | 1.1E-09    | 8.8E-08    | 1.9E-01    | 1.7E-02    | 2.3E-01    | 1.4E-04    | 4.7E-03    | 9.3E-01    |
| 1110253 | 1.9E-10 | 4.6E-10 | 1.3E-07    | 5.7E-06    | 1.7E-08    | 2.6E-10    | 3.2E-04    | 1.5E-01    | 8.9E-04    | 1.0E+00    | 2.5E-01    | 4.7E-01    | 1.5E-02    |
| 4453627 | 1.9E-10 | 4.7E-10 | 1.3E-07    | 2.8E-02    | 1.4E-05    | 2.1E-10    | 4.2E-01    | 3.1E-02    | 1.8E-07    | 9.6E-01    | 3.7E-03    | 3.7E-02    | 2.1E-06    |
| 276484  | 2.1E-10 | 5.0E-10 | 1.5E-07    | 3.6E-02    | 6.9E-01    | 3.9E-10    | 1.0E+00    | 5.0E-01    | 2.5E-07    | 2.2E-01    | 1.1E-08    | 9.3E-01    | 3.0E-08    |
| 275218  | 2.1E-10 | 5.1E-10 | 1.5E-07    | 6.9E-07    | 9.2E-08    | 1.4E-10    | 8.0E-05    | 7.4E-01    | 2.7E-03    | 1.0E+00    | 8.0E-02    | 9.1E-01    | 2.8E-02    |
| 882782  | 2.3E-10 | 5.4E-10 | 1.6E-07    | 5.5E-05    | 1.9E-10    | 5.7E-01    | 2.1E-04    | 4.6E-04    | 4.7E-02    | 9.3E-01    | 9.6E-07    | 8.7E-02    | 3.2E-02    |
| 320169  | 2.3E-10 | 5.5E-10 | 1.6E-07    | 2.8E-06    | 1.0E+00    | 9.8E-01    | 3.6E-07    | 4.6E-06    | 1.9E-04    | 2.5E-01    | 1.0E+00    | 5.9E-07    | 9.4E-06    |
| 195691  | 2.3E-10 | 5.6E-10 | 1.6E-07    | 1.9E-02    | 3.6E-07    | 1.1E-09    | 1.5E-04    | 1.7E-03    | 1.7E-06    | 1.1E-01    | 1.3E-01    | 9.5E-01    | 6.1E-02    |
| 4469233 | 2.4E-10 | 5.8E-10 | 1.7E-07    | 4.5E-02    | 2.3E-05    | 2.2E-10    | 4.6E-04    | 2.7E-02    | 9.8E-08    | 1.3E-01    | 2.6E-03    | 1.0E+00    | 1.0E-02    |
| 298973  | 2.6E-10 | 6.2E-10 | 1.8E-07    | 4.0E-06    | 8.6E-08    | 2.5E-09    | 3.9E-01    | 4.1E-01    | 9.7E-03    | 3.5E-02    | 3.8E-01    | 1.3E-03    | 2.2E-05    |
| 130663  | 2.6E-10 | 6.2E-10 | 1.8E-07    | 1.6E-06    | 2.1E-09    | 9.4E-01    | 3.9E-02    | 8.0E-02    | 3.0E-04    | 3.2E-01    | 5.4E-07    | 3.3E-03    | 2.6E-01    |
| 4424327 | 2.6E-10 | 6.2E-10 | 1.8E-07    | 5.8E-08    | 9.6E-01    | 7.5E-04    | 3.2E-06    | 2.7E-07    | 5.9E-01    | 9.9E-01    | 3.4E-03    | 1.4E-05    | 5.0E-01    |
| 645358  | 3.0E-10 | 7.2E-10 | 2.1E-07    | 1.3E-07    | 9.9E-01    | 9.7E-01    | 1.1E-02    | 6.3E-09    | 1.8E-05    | 2.8E-01    | 8.6E-01    | 3.0E-03    | 8.0E-02    |
| 299267  | 3.1E-10 | 7.3E-10 | 2.2E-07    | 3.6E-08    | 2.7E-09    | 8.1E-08    | 2.2E-07    | 5.8E-01    | 7.2E-01    | 7.5E-01    | 1.0E+00    | 1.0E+00    | 1.0E+00    |
| 4335302 | 3.6E-10 | 8.4E-10 | 2.5E-07    | 5.5E-01    | 2.0E-03    | 5.1E-10    | 4.1E-02    | 3.7E-02    | 2.9E-09    | 3.4E-01    | 1.1E-04    | 9.9E-01    | 2.2E-04    |
| 181091  | 3.7E-10 | 8.5E-10 | 2.6E-07    | 2.8E-03    | 4.9E-04    | 4.8E-10    | 9.9E-01    | 8.6E-01    | 6.1E-06    | 4.7E-02    | 3.8E-04    | 1.0E-02    | 4.4E-08    |
| 40798   | 3.8E-10 | 8.7E-10 | 2.6E-07    | 6.5E-03    | 4.9E-09    | 7.7E-08    | 1.9E-01    | 7.7E-05    | 5.1E-04    | 9.7E-01    | 1.0E+00    | 5.8E-04    | 1.4E-03    |
| 1107652 | 3.8E-10 | 8.7E-10 | 2.6E-07    | 5.3E-05    | 9.6E-01    | 9.7E-01    | 2.0E-07    | 2.8E-04    | 3.1E-05    | 3.9E-02    | 7.4E-01    | 8.0E-07    | 1.3E-07    |
| 198194  | 4.0E-10 | 9.3E-10 | 2.8E-07    | 1.7E-09    | 1.6E-09    | 2.0E-05    | 2.1E-06    | 9.4E-01    | 7.8E-01    | 1.0E+00    | 4.6E-01    | 9.5E-01    | 9.3E-01    |
| 1109929 | 4.1E-10 | 9.4E-10 | 2.9E-07    | 2.3E-07    | 3.0E-02    | 1.1E-08    | 4.2E-07    | 1.1E-02    | 1.6E-01    | 6.1E-01    | 1.0E-04    | 2.2E-03    | 9.7E-01    |
| 4378740 | 4.2E-10 | 9.6E-10 | 2.9E-07    | 1.5E-03    | 9.9E-01    | 9.4E-01    | 3.8E-09    | 3.1E-03    | 5.5E-02    | 7.5E-05    | 9.9E-01    | 5.7E-09    | 3.2E-07    |
| 356164  | 4.5E-10 | 1.0E-09 | 3.2E-07    | 3.1E-06    | 1.4E-10    | 1.0E-01    | 1.2E-02    | 5.0E-03    | 1.2E-01    | 7.0E-01    | 3.4E-05    | 1.8E-03    | 9.1E-01    |
| 51677   | 5.0E-10 | 1.1E-09 | 3.5E-07    | 1.8E-08    | 1.7E-06    | 2.4E-09    | 1.1E-06    | 9.5E-01    | 2.2E-01    | 9.8E-01    | 9.3E-02    | 8.2E-01    | 7.2E-01    |
| 229452  | 5.1E-10 | 1.2E-09 | 3.6E-07    | 2.0E-06    | 1.9E-06    | 1.9E-10    | 2.3E-05    | 9.8E-01    | 1.5E-03    | 9.5E-01    | 1.4E-02    | 1.0E+00    | 7.4E-02    |

Table S4

| ID      | Pr      | FDR     | Bonferroni | Tukey P.A. | Tukey R.A. | Tukey T.A. | Tukey W.A. | Tukey R.P. | Tukey T.P. | Tukey W.P. | Tukey T.R. | Tukey W.R. | Tukey W.T. |
|---------|---------|---------|------------|------------|------------|------------|------------|------------|------------|------------|------------|------------|------------|
| 262159  | 5.2E-10 | 1.2E-09 | 3.7E-07    | 1.3E-01    | 3.1E-01    | 1.5E-09    | 6.6E-05    | 1.0E+00    | 1.7E-07    | 9.6E-03    | 4.0E-07    | 9.5E-03    | 1.2E-01    |
| 266206  | 5.3E-10 | 1.2E-09 | 3.7E-07    | 3.0E-03    | 6.8E-08    | 2.1E-09    | 1.6E-03    | 2.7E-03    | 2.7E-05    | 7.7E-01    | 3.8E-01    | 3.6E-01    | 1.7E-02    |
| 273904  | 5.3E-10 | 1.2E-09 | 3.7E-07    | 2.1E-01    | 1.3E-08    | 1.1E-06    | 1.6E-01    | 1.1E-06    | 1.1E-04    | 9.6E-01    | 1.0E+00    | 1.8E-03    | 1.3E-02    |
| 264101  | 6.0E-10 | 1.3E-09 | 4.2E-07    | 8.5E-02    | 1.2E-07    | 1.5E-06    | 1.0E+00    | 6.8E-05    | 5.4E-04    | 1.9E-01    | 1.0E+00    | 2.8E-06    | 1.4E-05    |
| 619224  | 6.2E-10 | 1.4E-09 | 4.3E-07    | 3.3E-06    | 6.9E-10    | 9.1E-08    | 2.6E-05    | 2.0E-02    | 1.5E-01    | 9.3E-01    | 1.0E+00    | 4.7E-01    | 7.6E-01    |
| 185125  | 6.2E-10 | 1.4E-09 | 4.3E-07    | 3.9E-07    | 1.3E-07    | 3.8E-09    | 4.3E-07    | 8.7E-01    | 6.0E-02    | 5.4E-01    | 3.9E-01    | 9.5E-01    | 8.9E-01    |
| 192598  | 6.9E-10 | 1.5E-09 | 4.9E-07    | 8.4E-02    | 5.2E-08    | 5.3E-08    | 9.0E-03    | 2.7E-05    | 1.7E-05    | 5.1E-01    | 9.2E-01    | 1.1E-01    | 3.3E-02    |
| 1108453 | 7.0E-10 | 1.5E-09 | 4.9E-07    | 1.8E-03    | 7.1E-07    | 1.9E-09    | 4.1E-01    | 3.5E-02    | 4.3E-05    | 5.8E-01    | 1.3E-01    | 5.4E-03    | 1.6E-05    |
| 269426  | 7.1E-10 | 1.6E-09 | 5.0E-07    | 1.5E-02    | 3.3E-08    | 4.0E-08    | 2.4E-01    | 2.0E-04    | 1.1E-04    | 9.9E-01    | 9.3E-01    | 1.7E-03    | 5.9E-04    |
| 575261  | 7.2E-10 | 1.6E-09 | 5.0E-07    | 5.2E-03    | 4.6E-09    | 8.0E-08    | 1.3E-02    | 9.3E-05    | 6.6E-04    | 9.8E-01    | 1.0E+00    | 1.9E-02    | 3.0E-02    |
| 199707  | 7.3E-10 | 1.6E-09 | 5.1E-07    | 1.6E-06    | 8.8E-09    | 8.0E-01    | 2.4E-05    | 2.0E-01    | 1.1E-03    | 9.7E-01    | 7.1E-06    | 8.3E-01    | 2.3E-03    |
| 265301  | 7.4E-10 | 1.6E-09 | 5.2E-07    | 1.6E-02    | 9.1E-08    | 7.4E-09    | 2.5E-03    | 5.3E-04    | 1.7E-05    | 5.7E-01    | 5.5E-01    | 3.2E-01    | 2.7E-02    |
| 1106101 | 7.9E-10 | 1.7E-09 | 5.6E-07    | 1.7E-01    | 6.2E-01    | 1.8E-01    | 3.9E-10    | 9.4E-01    | 9.9E-01    | 2.4E-08    | 3.9E-01    | 1.5E-08    | 5.2E-06    |
| 264294  | 8.0E-10 | 1.7E-09 | 5.6E-07    | 1.0E-01    | 4.1E-01    | 3.7E-10    | 3.6E-02    | 9.7E-01    | 5.6E-08    | 8.1E-01    | 4.9E-08    | 5.6E-01    | 2.0E-04    |
| 319816  | 9.2E-10 | 2.0E-09 | 6.4E-07    | 2.4E-08    | 1.4E-08    | 3.0E-08    | 2.1E-05    | 9.1E-01    | 5.9E-01    | 1.0E+00    | 9.6E-01    | 8.9E-01    | 6.3E-01    |
| 204111  | 9.4E-10 | 2.0E-09 | 6.6E-07    | 2.5E-05    | 1.4E-09    | 7.1E-01    | 4.1E-04    | 6.6E-03    | 1.4E-02    | 9.9E-01    | 2.4E-06    | 1.5E-01    | 3.1E-02    |
| 1111328 | 9.8E-10 | 2.1E-09 | 6.9E-07    | 3.4E-01    | 7.0E-02    | 6.4E-10    | 7.3E-01    | 8.0E-01    | 1.2E-08    | 1.0E+00    | 2.0E-06    | 8.2E-01    | 1.0E-06    |
| 176836  | 9.8E-10 | 2.1E-09 | 6.9E-07    | 5.8E-02    | 5.4E-04    | 2.8E-10    | 1.1E-02    | 2.3E-01    | 9.3E-08    | 6.5E-01    | 2.1E-04    | 1.0E+00    | 6.3E-04    |
| 4453609 | 9.8E-10 | 2.1E-09 | 6.9E-07    | 2.2E-07    | 4.9E-02    | 9.2E-01    | 1.5E-07    | 5.2E-03    | 6.8E-05    | 4.3E-01    | 4.2E-01    | 5.1E-04    | 1.1E-05    |
| 187181  | 1.0E-09 | 2.1E-09 | 7.0E-07    | 4.9E-01    | 1.0E+00    | 2.2E-08    | 9.9E-04    | 5.9E-01    | 2.6E-07    | 1.8E-02    | 1.8E-08    | 1.2E-03    | 1.0E-01    |
| 185550  | 1.0E-09 | 2.2E-09 | 7.3E-07    | 1.1E-06    | 6.5E-07    | 8.8E-01    | 3.2E-07    | 9.4E-01    | 4.4E-04    | 3.4E-01    | 1.6E-04    | 7.6E-01    | 3.3E-05    |
| 188786  | 1.1E-09 | 2.2E-09 | 7.4E-07    | 2.4E-06    | 3.4E-09    | 4.6E-08    | 1.4E-02    | 8.7E-02    | 1.2E-01    | 6.2E-01    | 1.0E+00    | 1.5E-02    | 2.1E-02    |
| 174667  | 1.1E-09 | 2.3E-09 | 7.6E-07    | 3.7E-06    | 2.0E-03    | 8.0E-09    | 9.0E-08    | 5.4E-01    | 2.7E-02    | 9.9E-02    | 1.3E-03    | 7.0E-03    | 1.0E+00    |
| 214116  | 1.1E-09 | 2.4E-09 | 8.0E-07    | 1.2E-03    | 1.8E-07    | 3.4E-09    | 6.9E-05    | 1.6E-02    | 1.1E-04    | 3.0E-01    | 3.2E-01    | 9.7E-01    | 1.8E-01    |
| 1594231 | 1.2E-09 | 2.5E-09 | 8.3E-07    | 1.2E-02    | 3.8E-01    | 4.6E-10    | 4.6E-01    | 5.9E-01    | 1.2E-06    | 8.3E-01    | 7.7E-08    | 1.0E+00    | 3.4E-06    |
| 175998  | 1.2E-09 | 2.6E-09 | 8.7E-07    | 1.2E-02    | 1.9E-02    | 1.6E-10    | 2.3E-02    | 1.0E+00    | 3.4E-07    | 9.8E-01    | 2.7E-06    | 9.9E-01    | 1.6E-04    |
| 4480555 | 1.3E-09 | 2.7E-09 | 9.0E-07    | 1.8E-09    | 2.5E-08    | 1.7E-04    | 1.8E-06    | 1.0E+00    | 3.9E-01    | 1.0E+00    | 4.9E-01    | 1.0E+00    | 6.6E-01    |
| 177930  | 1.3E-09 | 2.7E-09 | 9.3E-07    | 5.4E-03    | 2.2E-03    | 1.7E-10    | 1.8E-03    | 9.6E-01    | 9.5E-07    | 6.9E-01    | 3.2E-05    | 9.6E-01    | 2.6E-03    |
| 292892  | 1.4E-09 | 2.9E-09 | 9.9E-07    | 4.8E-02    | 1.5E-06    | 3.0E-08    | 8.8E-01    | 2.1E-03    | 2.0E-05    | 6.3E-01    | 3.7E-01    | 6.7E-04    | 1.1E-05    |
| 177414  | 1.5E-09 | 3.0E-09 | 1.0E-06    | 1.6E-06    | 1.2E-09    | 1.5E-01    | 5.8E-05    | 5.1E-02    | 5.5E-02    | 9.9E-01    | 1.1E-04    | 4.0E-01    | 8.8E-02    |
| 264657  | 1.5E-09 | 3.1E-09 | 1.1E-06    | 6.3E-06    | 2.6E-01    | 4.1E-01    | 6.5E-09    | 6.3E-03    | 2.4E-02    | 9.8E-03    | 1.0E+00    | 2.1E-06    | 1.4E-05    |
| 172389  | 1.8E-09 | 3.6E-09 | 1.2E-06    | 8.4E-01    | 9.4E-03    | 8.9E-09    | 3.2E-03    | 4.4E-02    | 1.3E-08    | 1.4E-02    | 3.2E-04    | 8.9E-01    | 2.5E-02    |
| 210950  | 1.8E-09 | 3.8E-09 | 1.3E-06    | 7.2E-07    | 4.6E-06    | 1.0E+00    | 6.0E-05    | 1.0E+00    | 5.8E-06    | 1.0E+00    | 2.3E-05    | 1.0E+00    | 1.5E-04    |
| 2084364 | 1.8E-09 | 3.8E-09 | 1.3E-06    | 3.8E-01    | 1.3E-07    | 1.6E-05    | 5.6E-05    | 3.6E-06    | 5.9E-04    | 1.9E-03    | 9.8E-01    | 9.6E-01    | 1.0E+00    |
| 193723  | 1.8E-09 | 3.8E-09 | 1.3E-06    | 3.4E-06    | 6.7E-06    | 9.8E-01    | 2.6E-07    | 1.0E+00    | 2.5E-04    | 2.0E-01    | 2.9E-04    | 3.9E-01    | 8.0E-06    |
| 4440624 | 1.9E-09 | 3.8E-09 | 1.3E-06    | 8.0E-05    | 1.5E-02    | 2.7E-10    | 2.1E-03    | 6.1E-01    | 1.0E-04    | 1.0E+00    | 6.1E-06    | 7.5E-01    | 3.1E-03    |
| 196664  | 1.9E-09 | 3.8E-09 | 1.3E-06    | 7.3E-04    | 4.2E-10    | 9.1E-02    | 1.8E-01    | 7.0E-05    | 8.6E-01    | 7.7E-01    | 1.0E-04    | 9.6E-05    | 1.0E+00    |
| 188878  | 2.2E-09 | 4.5E-09 | 1.6E-06    | 9.2E-05    | 2.5E-09    | 2.9E-07    | 1.1E-02    | 3.6E-03    | 5.2E-02    | 9.9E-01    | 1.0E+00    | 1.5E-02    | 7.4E-02    |
| 345362  | 2.2E-09 | 4.5E-09 | 1.6E-06    | 2.6E-01    | 5.4E-07    | 4.2E-06    | 9.5E-06    | 4.4E-05    | 3.0E-04    | 6.1E-04    | 1.0E+00    | 1.0E+00    | 1.0E+00    |
| 197706  | 2.3E-09 | 4.6E-09 | 1.6E-06    | 1.6E-05    | 3.7E-01    | 2.0E-08    | 3.3E-05    | 6.5E-03    | 2.1E-02    | 8.0E-01    | 3.8E-06    | 3.8E-03    | 4.9E-01    |
| 135625  | 2.3E-09 | 4.6E-09 | 1.6E-06    | 8.6E-05    | 8.3E-02    | 7.0E-09    | 3.2E-06    | 2.1E-01    | 2.4E-03    | 1.9E-01    | 1.8E-05    | 4.2E-03    | 7.1E-01    |
| 522371  | 2.5E-09 | 4.9E-09 | 1.7E-06    | 2.5E-06    | 3.3E-08    | 7.3E-01    | 1.8E-05    | 3.2E-01    | 2.3E-03    | 9.1E-01    | 3.5E-05    | 9.6E-01    | 2.5E-03    |
| 313898  | 2.5E-09 | 5.0E-09 | 1.8E-06    | 4.0E-02    | 7.4E-05    | 1.4E-09    | 2.2E-01    | 8.1E-02    | 9.1E-07    | 1.0E+00    | 5.0E-03    | 2.3E-01    | 4.4E-05    |
| 187959  | 2.5E-09 | 5.0E-09 | 1.8E-06    | 2.9E-07    | 5.8E-10    | 7.5E-04    | 9.4E-04    | 9.7E-02    | 8.2E-01    | 8.9E-01    | 3.1E-02    | 5.4E-02    | 1.0E+00    |
| 1921818 | 2.6E-09 | 5.2E-09 | 1.8E-06    | 3.8E-02    | 1.6E-07    | 2.9E-07    | 6.7E-01    | 3.0E-04    | 2.8E-04    | 8.4E-01    | 9.7E-01    | 4.4E-04    | 2.7E-04    |
| 263953  | 2.6E-09 | 5.2E-09 | 1.9E-06    | 3.2E-02    | 1.1E-03    | 2.3E-09    | 9.6E-01    | 5.0E-01    | 2.1E-06    | 3.9E-01    | 7.9E-04    | 4.0E-02    | 5.1E-07    |
| 320972  | 2.7E-09 | 5.3E-09 | 1.9E-06    | 6.0E-01    | 4.4E-02    | 7.0E-09    | 1.0E+00    | 4.0E-01    | 4.1E-08    | 7.9E-01    | 4.2E-05    | 1.3E-01    | 1.7E-07    |
| 4471135 | 2.7E-09 | 5.3E-09 | 1.9E-06    | 1.2E-01    | 4.6E-03    | 1.9E-09    | 9.0E-01    | 4.6E-01    | 2.5E-07    | 8.1E-01    | 1.6E-04    | 1.6E-01    | 8.4E-07    |
| 1105589 | 2.8E-09 | 5.5E-09 | 2.0E-06    | 8.0E-05    | 1.6E-09    | 2.0E-02    | 2.5E-06    | 2.8E-03    | 9.0E-01    | 1.7E-01    | 2.5E-03    | 9.3E-01    | 7.5E-02    |
| 197782  | 2.9E-09 | 5.6E-09 | 2.0E-06    | 3.1E-05    | 1.8E-06    | 1.1E-09    | 4.1E-04    | 6.2E-01    | 9.3E-04    | 9.9E-01    | 5.4E-02    | 9.7E-01    | 3.1E-02    |
| 4483264 | 2.9E-09 | 5.6E-09 | 2.0E-06    | 6.4E-04    | 7.4E-07    | 2.2E-09    | 1.3E-03    | 8.3E-02    | 1.4E-04    | 9.2E-01    | 1.4E-01    | 7.5E-01    | 2.1E-02    |
| 363383  | 2.9E-09 | 5.7E-09 | 2.1E-06    | 4.0E-05    | 1.7E-08    | 4.1E-07    | 1.0E-06    | 3.9E-02    | 1.1E-01    | 1.4E-01    | 1.0E+00    | 1.0E+00    | 1.0E+00    |

Table S4

| ID      | Pr      | FDR     | Bonferroni | Tukey P.A. | Tukey R.A. | Tukey T.A. | Tukey W.A. | Tukey R.P. | Tukey T.P. | Tukey W.P. | Tukey T.R. | Tukey W.R. | Tukey W.T. |
|---------|---------|---------|------------|------------|------------|------------|------------|------------|------------|------------|------------|------------|------------|
| 4389125 | 3.0E-09 | 5.7E-09 | 2.1E-06    | 3.3E-07    | 1.4E-06    | 8.7E-01    | 5.7E-06    | 1.0E+00    | 1.6E-04    | 9.5E-01    | 3.2E-04    | 9.8E-01    | 4.3E-04    |
| 4365109 | 3.0E-09 | 5.8E-09 | 2.1E-06    | 1.6E-01    | 4.5E-03    | 1.2E-09    | 4.1E-01    | 3.7E-01    | 9.8E-08    | 1.0E+00    | 1.0E-04    | 6.2E-01    | 1.1E-05    |
| 30067   | 3.0E-09 | 5.8E-09 | 2.1E-06    | 3.1E-05    | 5.1E-02    | 1.1E-09    | 1.4E-01    | 1.8E-01    | 9.8E-04    | 3.6E-01    | 5.6E-06    | 1.0E+00    | 7.5E-05    |
| 244484  | 3.1E-09 | 6.0E-09 | 2.2E-06    | 5.7E-05    | 5.3E-08    | 1.1E-08    | 4.8E-03    | 7.1E-02    | 4.8E-03    | 1.0E+00    | 6.9E-01    | 1.7E-01    | 2.0E-02    |
| 1991255 | 3.2E-09 | 6.1E-09 | 2.2E-06    | 9.5E-03    | 5.0E-06    | 3.7E-09    | 2.7E-04    | 3.8E-02    | 1.5E-05    | 2.4E-01    | 6.6E-02    | 1.0E+00    | 8.7E-02    |
| 233691  | 3.3E-09 | 6.2E-09 | 2.3E-06    | 2.8E-02    | 5.9E-06    | 4.7E-08    | 9.8E-01    | 1.5E-02    | 6.3E-05    | 2.9E-01    | 2.6E-01    | 5.7E-04    | 4.8E-06    |
| 1136443 | 3.5E-09 | 6.6E-09 | 2.4E-06    | 9.3E-03    | 1.9E-08    | 1.7E-06    | 4.3E-01    | 2.0E-04    | 6.5E-03    | 8.3E-01    | 1.0E+00    | 3.2E-04    | 3.6E-03    |
| 260233  | 3.7E-09 | 7.0E-09 | 2.6E-06    | 2.9E-02    | 2.5E-05    | 3.5E-09    | 3.1E-01    | 4.8E-02    | 3.7E-06    | 9.9E-01    | 2.2E-02    | 8.8E-02    | 5.0E-05    |
| 4477372 | 3.8E-09 | 7.3E-09 | 2.7E-06    | 4.4E-01    | 1.8E-04    | 2.3E-08    | 8.9E-01    | 6.3E-03    | 3.6E-07    | 9.9E-01    | 2.3E-02    | 2.2E-02    | 8.3E-06    |
| 1111755 | 3.9E-09 | 7.4E-09 | 2.7E-06    | 4.5E-06    | 4.5E-05    | 9.8E-01    | 1.0E+00    | 1.0E+00    | 4.2E-06    | 2.9E-04    | 3.0E-05    | 1.2E-03    | 9.3E-01    |
| 175646  | 3.9E-09 | 7.4E-09 | 2.8E-06    | 5.9E-06    | 5.9E-05    | 1.0E+00    | 3.2E-07    | 1.0E+00    | 2.0E-04    | 1.7E-01    | 9.8E-04    | 1.7E-01    | 5.3E-06    |
| 277067  | 4.0E-09 | 7.6E-09 | 2.8E-06    | 6.5E-06    | 1.5E-05    | 1.3E-09    | 9.7E-05    | 1.0E+00    | 3.7E-03    | 9.8E-01    | 1.5E-02    | 1.0E+00    | 9.0E-02    |
| 177271  | 4.1E-09 | 7.7E-09 | 2.9E-06    | 2.3E-08    | 1.4E-08    | 6.7E-05    | 2.6E-02    | 9.2E-01    | 9.0E-01    | 6.3E-02    | 5.7E-01    | 2.0E-02    | 5.1E-01    |
| 832558  | 4.2E-09 | 7.9E-09 | 3.0E-06    | 2.0E-07    | 7.8E-08    | 9.1E-08    | 1.6E-02    | 8.9E-01    | 4.8E-01    | 2.7E-01    | 9.3E-01    | 8.4E-02    | 2.8E-02    |
| 266091  | 4.3E-09 | 8.0E-09 | 3.0E-06    | 2.7E-02    | 2.1E-01    | 9.2E-10    | 6.5E-02    | 9.4E-01    | 9.6E-07    | 1.0E+00    | 5.0E-07    | 8.9E-01    | 2.0E-04    |
| 276663  | 4.5E-09 | 8.4E-09 | 3.2E-06    | 2.1E-04    | 1.9E-08    | 9.5E-07    | 4.1E-01    | 1.1E-02    | 7.2E-02    | 2.6E-01    | 1.0E+00    | 3.6E-04    | 2.5E-03    |
| 1112121 | 4.6E-09 | 8.6E-09 | 3.3E-06    | 1.2E-01    | 1.4E-02    | 2.0E-09    | 1.8E-03    | 7.3E-01    | 2.6E-07    | 1.5E-01    | 4.9E-05    | 7.3E-01    | 1.5E-02    |
| 177205  | 5.0E-09 | 9.2E-09 | 3.5E-06    | 2.7E-07    | 1.6E-08    | 2.1E-01    | 3.4E-02    | 5.8E-01    | 9.9E-03    | 1.7E-01    | 5.3E-04    | 1.6E-02    | 9.2E-01    |
| 356226  | 5.4E-09 | 9.9E-09 | 3.8E-06    | 9.0E-06    | 4.2E-08    | 9.6E-01    | 5.2E-02    | 1.9E-01    | 8.1E-04    | 4.8E-01    | 5.1E-06    | 1.8E-02    | 2.7E-01    |
| 4483570 | 5.5E-09 | 1.0E-08 | 3.8E-06    | 3.9E-06    | 1.5E-05    | 9.1E-01    | 3.0E-07    | 1.0E+00    | 8.5E-04    | 2.0E-01    | 1.6E-03    | 3.0E-01    | 2.4E-05    |
| 112720  | 5.9E-09 | 1.1E-08 | 4.1E-06    | 8.4E-05    | 2.4E-07    | 9.1E-01    | 2.6E-06    | 1.5E-01    | 9.2E-03    | 1.7E-01    | 4.9E-05    | 1.0E+00    | 1.6E-04    |
| 271013  | 6.0E-09 | 1.1E-08 | 4.2E-06    | 1.7E-03    | 2.5E-07    | 1.0E+00    | 1.0E+00    | 1.6E-02    | 6.1E-03    | 1.0E-02    | 2.1E-06    | 5.2E-06    | 1.0E+00    |
| 272593  | 6.1E-09 | 1.1E-08 | 4.3E-06    | 3.7E-06    | 8.2E-02    | 3.0E-03    | 7.6E-09    | 2.5E-02    | 8.8E-01    | 1.6E-02    | 5.2E-01    | 1.5E-05    | 7.6E-03    |
| 179426  | 6.6E-09 | 1.2E-08 | 4.7E-06    | 7.5E-04    | 2.9E-06    | 3.9E-09    | 5.0E-04    | 1.8E-01    | 2.0E-04    | 7.6E-01    | 9.2E-02    | 9.8E-01    | 5.9E-02    |
| 312322  | 6.7E-09 | 1.2E-08 | 4.7E-06    | 8.2E-07    | 5.7E-04    | 6.3E-01    | 8.3E-08    | 5.5E-01    | 1.7E-03    | 1.9E-01    | 1.0E-01    | 1.7E-02    | 4.2E-05    |
| 269401  | 7.1E-09 | 1.3E-08 | 5.0E-06    | 1.6E-02    | 7.7E-08    | 2.6E-07    | 7.1E-03    | 4.3E-04    | 6.6E-04    | 7.9E-01    | 9.9E-01    | 1.6E-01    | 1.0E-01    |
| 186555  | 7.3E-09 | 1.3E-08 | 5.2E-06    | 2.4E-06    | 7.5E-04    | 2.9E-08    | 8.8E-07    | 6.9E-01    | 8.8E-02    | 4.1E-01    | 9.5E-03    | 7.7E-02    | 9.8E-01    |
| 182043  | 7.4E-09 | 1.3E-08 | 5.2E-06    | 8.6E-04    | 2.3E-01    | 2.6E-09    | 3.2E-01    | 2.8E-01    | 1.2E-04    | 5.8E-01    | 1.3E-06    | 1.0E+00    | 3.7E-05    |
| 259511  | 7.8E-09 | 1.4E-08 | 5.5E-06    | 9.2E-01    | 3.1E-01    | 2.4E-08    | 2.2E-02    | 6.6E-01    | 2.0E-08    | 6.1E-02    | 6.7E-06    | 5.4E-01    | 8.5E-03    |
| 265047  | 8.3E-09 | 1.5E-08 | 5.8E-06    | 5.5E-01    | 3.8E-01    | 1.1E-08    | 9.9E-01    | 9.9E-01    | 8.6E-08    | 9.3E-01    | 1.9E-06    | 8.1E-01    | 9.0E-07    |
| 354736  | 8.2E-09 | 1.5E-08 | 5.8E-06    | 2.9E-06    | 1.8E-02    | 4.1E-08    | 4.6E-06    | 1.2E-01    | 1.0E-01    | 6.9E-01    | 6.6E-04    | 2.5E-02    | 8.8E-01    |
| 325850  | 8.3E-09 | 1.5E-08 | 5.8E-06    | 8.1E-09    | 3.3E-03    | 7.4E-01    | 5.4E-03    | 8.9E-03    | 2.0E-05    | 1.4E-01    | 2.0E-01    | 9.9E-01    | 1.6E-01    |
| 189666  | 8.3E-09 | 1.5E-08 | 5.8E-06    | 4.5E-05    | 7.0E-07    | 6.9E-09    | 3.5E-03    | 3.8E-01    | 4.0E-03    | 1.0E+00    | 2.6E-01    | 5.3E-01    | 2.0E-02    |
| 4334624 | 8.3E-09 | 1.5E-08 | 5.9E-06    | 1.3E-06    | 8.0E-01    | 2.2E-05    | 3.8E-05    | 4.1E-05    | 9.9E-01    | 9.9E-01    | 3.9E-04    | 6.0E-04    | 1.0E+00    |
| 1108378 | 8.4E-09 | 1.5E-08 | 5.9E-06    | 1.3E-01    | 2.8E-02    | 3.0E-09    | 3.8E-03    | 8.7E-01    | 3.9E-07    | 2.5E-01    | 3.2E-05    | 7.5E-01    | 1.0E-02    |
| 272192  | 1.0E-08 | 1.8E-08 | 7.0E-06    | 3.1E-05    | 1.6E-03    | 6.7E-09    | 8.9E-06    | 9.1E-01    | 5.2E-03    | 4.7E-01    | 1.4E-03    | 2.0E-01    | 5.4E-01    |
| 196974  | 1.0E-08 | 1.8E-08 | 7.1E-06    | 2.6E-04    | 8.0E-08    | 1.6E-07    | 1.2E-01    | 3.1E-02    | 1.6E-02    | 7.3E-01    | 9.7E-01    | 9.4E-03    | 4.8E-03    |
| 214120  | 1.0E-08 | 1.8E-08 | 7.3E-06    | 3.1E-07    | 3.5E-07    | 7.4E-01    | 2.3E-03    | 9.8E-01    | 4.1E-04    | 7.4E-01    | 2.4E-04    | 5.2E-01    | 9.2E-02    |
| 3868285 | 1.1E-08 | 1.9E-08 | 7.4E-06    | 2.3E-05    | 2.8E-06    | 8.7E-09    | 5.6E-02    | 7.7E-01    | 8.1E-03    | 5.9E-01    | 1.5E-01    | 1.7E-01    | 1.4E-03    |
| 209845  | 1.1E-08 | 1.9E-08 | 7.6E-06    | 2.3E-04    | 1.3E-06    | 6.8E-06    | 1.0E+00    | 2.3E-01    | 2.4E-01    | 2.1E-03    | 1.0E+00    | 2.1E-05    | 5.3E-05    |
| 179457  | 1.1E-08 | 2.0E-08 | 8.0E-06    | 2.1E-04    | 2.4E-06    | 2.3E-07    | 4.5E-07    | 3.3E-01    | 2.5E-02    | 3.0E-02    | 6.5E-01    | 6.4E-01    | 1.0E+00    |
| 808794  | 1.2E-08 | 2.1E-08 | 8.4E-06    | 4.5E-03    | 9.8E-09    | 7.0E-06    | 1.6E-03    | 2.5E-04    | 4.0E-02    | 7.1E-01    | 8.8E-01    | 1.6E-01    | 7.0E-01    |
| 187233  | 1.2E-08 | 2.1E-08 | 8.4E-06    | 9.0E-08    | 3.8E-04    | 2.7E-04    | 4.6E-08    | 2.7E-01    | 8.5E-01    | 3.5E-01    | 9.7E-01    | 1.5E-02    | 1.3E-01    |
| 180077  | 1.2E-08 | 2.1E-08 | 8.5E-06    | 1.4E-04    | 1.2E-03    | 8.9E-01    | 2.0E-08    | 1.0E+00    | 1.5E-02    | 2.9E-03    | 5.0E-02    | 3.0E-03    | 2.3E-06    |
| 831301  | 1.4E-08 | 2.3E-08 | 9.5E-06    | 6.3E-06    | 2.5E-06    | 1.0E+00    | 7.2E-02    | 9.2E-01    | 2.3E-05    | 3.4E-01    | 8.1E-06    | 1.3E-01    | 7.2E-02    |
| 258641  | 1.4E-08 | 2.4E-08 | 1.0E-05    | 4.6E-01    | 6.8E-01    | 3.7E-08    | 1.0E+00    | 1.0E+00    | 5.3E-07    | 4.7E-01    | 1.3E-06    | 6.5E-01    | 2.6E-07    |
| 356187  | 1.5E-08 | 2.5E-08 | 1.0E-05    | 3.2E-01    | 7.8E-06    | 1.3E-06    | 9.8E-01    | 5.0E-04    | 5.9E-05    | 8.4E-01    | 7.6E-01    | 6.7E-04    | 8.0E-05    |
| 173892  | 1.5E-08 | 2.5E-08 | 1.0E-05    | 5.2E-04    | 3.6E-07    | 3.9E-08    | 6.5E-04    | 5.7E-02    | 2.7E-03    | 8.5E-01    | 6.3E-01    | 7.7E-01    | 1.7E-01    |
| 176868  | 1.5E-08 | 2.6E-08 | 1.1E-05    | 6.0E-03    | 8.4E-01    | 3.1E-06    | 1.6E-06    | 8.2E-02    | 1.7E-02    | 7.3E-03    | 4.4E-05    | 2.2E-05    | 1.0E+00    |
| 198238  | 1.6E-08 | 2.7E-08 | 1.1E-05    | 7.4E-04    | 1.6E-02    | 1.7E-09    | 2.8E-02    | 9.4E-01    | 8.9E-05    | 1.0E+00    | 3.5E-05    | 1.0E+00    | 9.0E-04    |
| 302641  | 1.6E-08 | 2.7E-08 | 1.1E-05    | 2.1E-05    | 3.0E-06    | 9.7E-09    | 4.2E-04    | 7.9E-01    | 9.3E-03    | 1.0E+00    | 1.6E-01    | 9.8E-01    | 1.1E-01    |
| 182995  | 1.7E-08 | 2.9E-08 | 1.2E-05    | 3.8E-05    | 4.5E-05    | 4.6E-01    | 3.2E-08    | 9.9E-01    | 5.9E-02    | 1.1E-02    | 4.0E-02    | 4.7E-02    | 4.2E-05    |



Table S4

| ID      | Pr      | FDR     | Bonferroni | Tukey P.A. | Tukey R.A. | Tukey T.A. | Tukey W.A. | Tukey R.P. | Tukey T.P. | Tukey W.P. | Tukey T.R. | Tukey W.R. | Tukey W.T. |
|---------|---------|---------|------------|------------|------------|------------|------------|------------|------------|------------|------------|------------|------------|
| 929476  | 1.8E-08 | 3.0E-08 | 1.2E-05    | 3.1E-02    | 4.0E-07    | 9.3E-06    | 8.3E-06    | 1.0E-03    | 9.7E-03    | 7.0E-03    | 1.0E+00    | 1.0E+00    | 1.0E+00    |
| 4476780 | 1.8E-08 | 3.0E-08 | 1.3E-05    | 4.6E-04    | 3.8E-03    | 1.8E-09    | 2.6E-02    | 1.0E+00    | 1.5E-04    | 1.0E+00    | 1.8E-04    | 1.0E+00    | 1.0E-03    |
| 166535  | 2.0E-08 | 3.3E-08 | 1.4E-05    | 2.3E-03    | 8.2E-05    | 9.6E-01    | 7.5E-08    | 5.4E-01    | 6.1E-02    | 9.6E-04    | 3.6E-03    | 5.9E-02    | 3.9E-06    |
| 577170  | 2.2E-08 | 3.6E-08 | 1.5E-05    | 6.7E-06    | 8.9E-08    | 6.4E-02    | 8.4E-01    | 3.3E-01    | 2.7E-01    | 4.7E-03    | 1.1E-02    | 9.2E-05    | 5.7E-01    |
| 181193  | 2.2E-08 | 3.6E-08 | 1.5E-05    | 1.5E-01    | 7.3E-04    | 1.3E-08    | 3.3E-01    | 1.2E-01    | 1.5E-06    | 1.0E+00    | 4.9E-03    | 4.0E-01    | 1.3E-04    |
| 175114  | 2.2E-08 | 3.7E-08 | 1.6E-05    | 1.4E-01    | 3.0E-05    | 5.3E-07    | 1.0E+00    | 8.8E-03    | 9.5E-05    | 4.4E-01    | 3.9E-01    | 8.4E-04    | 1.6E-05    |
| 262801  | 2.3E-08 | 3.9E-08 | 1.6E-05    | 1.9E-02    | 2.4E-02    | 2.9E-09    | 1.4E-01    | 1.0E+00    | 5.2E-06    | 1.0E+00    | 3.8E-05    | 1.0E+00    | 1.6E-04    |
| 4390754 | 2.3E-08 | 3.9E-08 | 1.6E-05    | 3.9E-01    | 9.6E-05    | 1.2E-06    | 1.0E+00    | 4.3E-03    | 3.6E-05    | 4.6E-01    | 3.5E-01    | 4.9E-04    | 7.6E-06    |
| 4464113 | 2.4E-08 | 3.9E-08 | 1.7E-05    | 1.2E-07    | 2.7E-06    | 4.8E-01    | 2.6E-04    | 1.0E+00    | 9.0E-04    | 9.6E-01    | 5.0E-03    | 9.9E-01    | 5.2E-02    |
| 190646  | 2.4E-08 | 4.0E-08 | 1.7E-05    | 1.9E-02    | 3.2E-05    | 1.3E-08    | 1.6E-02    | 8.5E-02    | 2.5E-05    | 9.1E-01    | 4.9E-02    | 7.7E-01    | 7.9E-03    |
| 197025  | 2.5E-08 | 4.1E-08 | 1.7E-05    | 3.0E-06    | 9.9E-01    | 1.0E+00    | 1.9E-03    | 6.2E-06    | 7.1E-05    | 9.7E-01    | 1.0E+00    | 4.2E-03    | 8.3E-03    |
| 186886  | 2.6E-08 | 4.3E-08 | 1.8E-05    | 1.7E-03    | 4.2E-04    | 3.5E-09    | 3.5E-03    | 9.1E-01    | 8.5E-05    | 9.5E-01    | 2.6E-03    | 1.0E+00    | 1.2E-02    |
| 1108078 | 2.6E-08 | 4.3E-08 | 1.8E-05    | 5.0E-01    | 2.8E-02    | 1.5E-08    | 1.6E-01    | 3.7E-01    | 1.6E-07    | 7.7E-01    | 1.5E-04    | 1.0E+00    | 5.3E-04    |
| 172705  | 2.6E-08 | 4.3E-08 | 1.9E-05    | 5.6E-01    | 1.3E-07    | 5.3E-01    | 1.0E+00    | 1.1E-06    | 1.0E+00    | 8.2E-01    | 3.6E-04    | 6.2E-06    | 7.4E-01    |
| 177621  | 2.7E-08 | 4.5E-08 | 1.9E-05    | 1.7E-03    | 4.8E-05    | 8.8E-09    | 5.6E-04    | 5.0E-01    | 2.1E-04    | 6.5E-01    | 2.9E-02    | 1.0E+00    | 8.8E-02    |
| 264225  | 2.9E-08 | 4.8E-08 | 2.0E-05    | 7.7E-03    | 1.4E-03    | 1.1E-08    | 1.4E-04    | 8.7E-01    | 5.8E-05    | 1.8E-01    | 2.4E-03    | 6.5E-01    | 2.2E-01    |
| 187841  | 3.0E-08 | 4.9E-08 | 2.1E-05    | 8.1E-07    | 2.6E-07    | 2.6E-01    | 2.7E-01    | 8.8E-01    | 1.5E-02    | 2.6E-02    | 3.2E-03    | 5.9E-03    | 1.0E+00    |
| 3920500 | 3.0E-08 | 4.9E-08 | 2.1E-05    | 1.4E-07    | 5.4E-08    | 6.4E-05    | 5.8E-03    | 8.8E-01    | 9.9E-01    | 4.3E-01    | 7.8E-01    | 1.5E-01    | 8.0E-01    |
| 162005  | 3.1E-08 | 5.0E-08 | 2.2E-05    | 1.3E-05    | 2.5E-07    | 8.3E-06    | 8.7E-07    | 4.1E-01    | 7.0E-01    | 2.2E-01    | 1.0E+00    | 9.6E-01    | 9.4E-01    |
| 4476330 | 3.2E-08 | 5.1E-08 | 2.2E-05    | 1.5E-04    | 2.0E-02    | 4.4E-08    | 1.1E-05    | 6.7E-01    | 8.0E-03    | 2.9E-01    | 6.2E-04    | 4.3E-02    | 7.8E-01    |
| 277200  | 3.2E-08 | 5.1E-08 | 2.2E-05    | 3.6E-05    | 4.6E-06    | 2.2E-06    | 2.3E-07    | 7.7E-01    | 3.0E-01    | 5.4E-02    | 8.9E-01    | 4.2E-01    | 9.3E-01    |
| 189789  | 3.3E-08 | 5.3E-08 | 2.3E-05    | 3.6E-01    | 1.2E-03    | 3.1E-08    | 5.0E-02    | 5.4E-02    | 8.2E-07    | 5.5E-01    | 6.9E-03    | 9.6E-01    | 4.3E-03    |
| 273967  | 3.3E-08 | 5.3E-08 | 2.3E-05    | 1.3E-02    | 2.8E-01    | 3.9E-08    | 1.6E-04    | 7.5E-01    | 1.3E-04    | 1.5E-01    | 1.4E-05    | 2.4E-02    | 3.4E-01    |
| 186777  | 3.4E-08 | 5.5E-08 | 2.4E-05    | 6.6E-04    | 1.3E-05    | 4.5E-07    | 9.9E-07    | 4.4E-01    | 1.9E-02    | 2.6E-02    | 4.9E-01    | 5.1E-01    | 1.0E+00    |
| 214919  | 3.8E-08 | 6.0E-08 | 2.7E-05    | 2.8E-06    | 2.3E-02    | 8.3E-01    | 3.4E-01    | 8.6E-02    | 3.3E-07    | 3.7E-02    | 2.1E-03    | 9.3E-01    | 6.6E-02    |
| 3172949 | 3.8E-08 | 6.1E-08 | 2.7E-05    | 8.1E-05    | 4.4E-05    | 3.3E-06    | 9.4E-08    | 9.6E-01    | 2.6E-01    | 1.6E-02    | 6.5E-01    | 9.8E-02    | 8.0E-01    |
| 4481359 | 3.8E-08 | 6.1E-08 | 2.7E-05    | 3.0E-02    | 8.9E-06    | 1.9E-07    | 6.1E-01    | 2.0E-02    | 2.4E-04    | 8.5E-01    | 4.1E-01    | 1.2E-02    | 2.7E-04    |
| 318079  | 3.9E-08 | 6.2E-08 | 2.7E-05    | 1.8E-05    | 2.7E-04    | 1.0E+00    | 1.0E+00    | 1.0E+00    | 6.5E-05    | 1.5E-04    | 5.8E-04    | 1.0E-03    | 1.0E+00    |
| 830014  | 3.9E-08 | 6.2E-08 | 2.8E-05    | 3.2E-03    | 3.7E-06    | 5.1E-08    | 1.2E-03    | 7.7E-02    | 6.8E-04    | 7.0E-01    | 3.3E-01    | 9.3E-01    | 1.4E-01    |
| 179853  | 3.9E-08 | 6.2E-08 | 2.8E-05    | 8.8E-03    | 9.7E-02    | 5.5E-09    | 8.7E-02    | 9.5E-01    | 2.5E-05    | 1.0E+00    | 1.1E-05    | 9.9E-01    | 5.7E-04    |
| 342962  | 4.0E-08 | 6.3E-08 | 2.8E-05    | 3.5E-02    | 1.0E+00    | 8.9E-01    | 2.3E-07    | 1.7E-02    | 4.7E-01    | 2.0E-04    | 8.4E-01    | 8.0E-08    | 2.2E-05    |
| 839558  | 4.0E-08 | 6.3E-08 | 2.8E-05    | 1.2E-05    | 6.0E-07    | 9.6E-01    | 2.2E-03    | 5.9E-01    | 1.0E-03    | 1.0E+00    | 5.3E-05    | 6.1E-01    | 2.6E-02    |
| 260989  | 4.3E-08 | 6.8E-08 | 3.0E-05    | 5.1E-02    | 6.0E-01    | 3.9E-08    | 2.8E-03    | 6.9E-01    | 2.4E-05    | 3.7E-01    | 2.2E-06    | 6.8E-02    | 6.6E-02    |
| 4442899 | 4.7E-08 | 7.3E-08 | 3.3E-05    | 9.2E-04    | 1.3E-07    | 3.7E-06    | 3.0E-01    | 1.6E-02    | 7.4E-02    | 6.1E-01    | 1.0E+00    | 3.0E-03    | 1.2E-02    |
| 647320  | 5.1E-08 | 8.0E-08 | 3.6E-05    | 1.5E-05    | 1.1E-04    | 2.0E-08    | 2.6E-04    | 1.0E+00    | 2.2E-02    | 9.9E-01    | 3.0E-02    | 9.9E-01    | 2.1E-01    |
| 191098  | 5.8E-08 | 9.0E-08 | 4.1E-05    | 4.1E-03    | 6.0E-06    | 1.3E-07    | 1.8E-04    | 8.9E-02    | 1.3E-03    | 2.9E-01    | 4.1E-01    | 1.0E+00    | 4.9E-01    |
| 349343  | 6.1E-08 | 9.5E-08 | 4.3E-05    | 6.7E-01    | 9.7E-04    | 1.1E-06    | 1.0E+00    | 1.1E-02    | 7.6E-06    | 7.8E-01    | 1.0E-01    | 5.1E-03    | 1.1E-05    |
| 199137  | 6.1E-08 | 9.5E-08 | 4.3E-05    | 2.8E-03    | 2.3E-05    | 3.2E-07    | 7.1E-06    | 2.7E-01    | 4.4E-03    | 4.3E-02    | 3.5E-01    | 7.7E-01    | 9.8E-01    |
| 270385  | 6.2E-08 | 9.7E-08 | 4.4E-05    | 1.6E-03    | 6.5E-02    | 6.4E-08    | 4.2E-05    | 7.9E-01    | 1.6E-03    | 2.0E-01    | 2.1E-04    | 4.1E-02    | 6.3E-01    |
| 196122  | 6.3E-08 | 9.8E-08 | 4.4E-05    | 5.9E-05    | 1.0E+00    | 1.0E+00    | 2.0E-03    | 6.9E-06    | 1.8E-04    | 1.0E+00    | 1.0E+00    | 5.8E-04    | 2.7E-03    |
| 4296701 | 6.4E-08 | 9.9E-08 | 4.5E-05    | 8.1E-05    | 8.7E-06    | 4.4E-08    | 3.4E-04    | 7.5E-01    | 1.3E-02    | 9.4E-01    | 2.1E-01    | 1.0E+00    | 2.5E-01    |
| 2072645 | 6.8E-08 | 1.0E-07 | 4.7E-05    | 1.8E-03    | 2.0E-07    | 1.0E-05    | 2.8E-05    | 1.2E-02    | 9.8E-02    | 1.5E-01    | 1.0E+00    | 1.0E+00    | 1.0E+00    |
| 182470  | 6.8E-08 | 1.0E-07 | 4.7E-05    | 4.3E-05    | 7.5E-02    | 1.0E-07    | 1.4E-04    | 1.5E-01    | 3.8E-02    | 9.0E-01    | 2.7E-04    | 8.7E-02    | 4.9E-01    |
| 193064  | 7.3E-08 | 1.1E-07 | 5.1E-05    | 3.0E-04    | 5.5E-05    | 7.8E-08    | 2.3E-05    | 8.5E-01    | 7.8E-03    | 3.1E-01    | 1.1E-01    | 8.3E-01    | 7.5E-01    |
| 835456  | 7.3E-08 | 1.1E-07 | 5.2E-05    | 1.9E-01    | 8.1E-07    | 1.0E+00    | 1.0E+00    | 1.2E-04    | 3.9E-01    | 2.7E-01    | 1.1E-05    | 8.6E-06    | 1.0E+00    |
| 174071  | 7.9E-08 | 1.2E-07 | 5.5E-05    | 4.6E-01    | 9.7E-04    | 1.7E-07    | 6.5E-01    | 2.8E-02    | 2.8E-06    | 1.0E+00    | 2.9E-02    | 1.8E-01    | 1.9E-04    |
| 4426367 | 8.1E-08 | 1.2E-07 | 5.7E-05    | 2.8E-06    | 2.9E-06    | 9.2E-01    | 5.1E-03    | 9.8E-01    | 6.1E-04    | 8.6E-01    | 3.9E-04    | 6.7E-01    | 7.4E-02    |
| 184484  | 8.5E-08 | 1.3E-07 | 5.9E-05    | 1.5E-07    | 2.7E-02    | 3.9E-01    | 5.0E-05    | 8.8E-03    | 1.9E-03    | 1.0E+00    | 8.8E-01    | 9.9E-02    | 2.4E-02    |
| 258559  | 8.5E-08 | 1.3E-07 | 6.0E-05    | 3.8E-01    | 1.1E-04    | 8.6E-07    | 8.9E-01    | 5.1E-03    | 2.6E-05    | 9.8E-01    | 2.9E-01    | 1.5E-02    | 1.8E-04    |
| 176139  | 8.8E-08 | 1.3E-07 | 6.2E-05    | 1.8E-01    | 6.2E-03    | 2.7E-08    | 7.0E-02    | 4.1E-01    | 2.5E-06    | 8.4E-01    | 1.3E-03    | 1.0E+00    | 2.6E-03    |
| 801260  | 8.8E-08 | 1.3E-07 | 6.2E-05    | 1.9E-06    | 5.3E-01    | 4.1E-01    | 2.3E-05    | 3.5E-04    | 1.0E-02    | 9.5E-01    | 1.0E+00    | 1.4E-03    | 1.2E-02    |
| 183106  | 8.9E-08 | 1.3E-07 | 6.2E-05    | 4.7E-05    | 4.9E-06    | 3.1E-06    | 1.3E-06    | 7.4E-01    | 3.2E-01    | 1.5E-01    | 9.2E-01    | 7.1E-01    | 9.9E-01    |

Table S4

| ID      | Pr      | FDR     | Bonferroni | Tukey P.A. | Tukey R.A. | Tukey T.A. | Tukey W.A. | Tukey R.P. | Tukey T.P. | Tukey W.P. | Tukey T.R. | Tukey W.R. | Tukey W.T. |
|---------|---------|---------|------------|------------|------------|------------|------------|------------|------------|------------|------------|------------|------------|
| 206324  | 8.9E-08 | 1.3E-07 | 6.2E-05    | 1.2E-04    | 2.1E-07    | 8.9E-01    | 4.2E-03    | 1.1E-01    | 1.4E-02    | 1.0E+00    | 5.4E-05    | 3.3E-01    | 7.5E-02    |
| 185177  | 9.2E-08 | 1.4E-07 | 6.5E-05    | 2.1E-02    | 5.9E-03    | 1.8E-07    | 1.0E+00    | 9.2E-01    | 3.4E-04    | 6.7E-02    | 7.1E-03    | 2.1E-02    | 2.2E-06    |
| 4329776 | 9.6E-08 | 1.4E-07 | 6.8E-05    | 6.6E-04    | 3.1E-06    | 2.1E-07    | 2.3E-04    | 2.1E-01    | 9.8E-03    | 6.3E-01    | 5.8E-01    | 1.0E+00    | 5.2E-01    |
| 4306262 | 9.7E-08 | 1.5E-07 | 6.8E-05    | 4.3E-01    | 1.2E-02    | 7.3E-03    | 6.7E-04    | 5.3E-06    | 1.1E-05    | 1.0E+00    | 9.8E-01    | 6.3E-04    | 4.4E-04    |
| 4414242 | 1.0E-07 | 1.5E-07 | 7.0E-05    | 8.1E-02    | 1.0E-04    | 1.3E-07    | 3.0E-03    | 5.1E-02    | 4.5E-05    | 2.9E-01    | 1.0E-01    | 1.0E+00    | 1.2E-01    |
| 228043  | 1.1E-07 | 1.6E-07 | 7.4E-05    | 1.7E-02    | 1.0E+00    | 1.6E-06    | 1.2E-03    | 2.9E-02    | 3.6E-03    | 4.0E-01    | 2.3E-06    | 2.0E-03    | 5.4E-01    |
| 261177  | 1.1E-07 | 1.7E-07 | 8.0E-05    | 1.3E-05    | 7.3E-04    | 9.9E-01    | 1.0E-03    | 9.3E-01    | 1.7E-05    | 1.0E+00    | 5.8E-04    | 9.8E-01    | 6.9E-04    |
| 264155  | 1.1E-07 | 1.7E-07 | 8.1E-05    | 2.9E-02    | 1.8E-02    | 1.7E-08    | 1.1E-02    | 9.9E-01    | 2.1E-05    | 7.9E-01    | 3.0E-04    | 9.6E-01    | 1.3E-02    |
| 328143  | 1.2E-07 | 1.8E-07 | 8.3E-05    | 3.4E-05    | 1.5E-06    | 9.9E-01    | 8.0E-02    | 5.8E-01    | 1.2E-03    | 5.5E-01    | 5.7E-05    | 9.2E-02    | 2.6E-01    |
| 1105328 | 1.2E-07 | 1.8E-07 | 8.5E-05    | 8.9E-02    | 1.2E-02    | 3.6E-08    | 4.3E-03    | 7.8E-01    | 1.0E-05    | 3.4E-01    | 8.9E-04    | 9.0E-01    | 4.7E-02    |
| 1105376 | 1.3E-07 | 1.9E-07 | 9.0E-05    | 1.8E-02    | 6.8E-01    | 5.3E-01    | 1.5E-03    | 8.5E-05    | 2.4E-04    | 4.3E-01    | 9.9E-01    | 1.9E-05    | 3.3E-05    |
| 177371  | 1.3E-07 | 1.9E-07 | 9.1E-05    | 1.4E-04    | 8.6E-05    | 6.4E-01    | 4.1E-07    | 9.7E-01    | 6.1E-02    | 3.6E-02    | 2.9E-02    | 1.6E-01    | 1.6E-04    |
| 372473  | 1.3E-07 | 1.9E-07 | 9.1E-05    | 2.2E-01    | 5.2E-06    | 3.1E-05    | 2.0E-04    | 6.7E-04    | 2.8E-03    | 1.4E-02    | 1.0E+00    | 1.0E+00    | 1.0E+00    |
| 167509  | 1.3E-07 | 1.9E-07 | 9.1E-05    | 1.8E-01    | 2.0E-03    | 6.8E-08    | 1.5E-02    | 1.9E-01    | 6.7E-06    | 4.5E-01    | 8.4E-03    | 1.0E+00    | 2.4E-02    |
| 214835  | 1.4E-07 | 2.0E-07 | 9.7E-05    | 7.4E-06    | 3.4E-04    | 8.8E-06    | 5.8E-07    | 9.5E-01    | 7.9E-01    | 2.2E-01    | 4.8E-01    | 9.4E-02    | 9.0E-01    |
| 337784  | 1.4E-07 | 2.0E-07 | 9.8E-05    | 2.3E-03    | 3.1E-06    | 1.0E+00    | 4.6E-04    | 8.7E-02    | 7.8E-03    | 5.6E-01    | 2.0E-05    | 9.8E-01    | 1.2E-03    |
| 204144  | 1.4E-07 | 2.1E-07 | 1.0E-04    | 2.8E-05    | 5.1E-06    | 1.0E+00    | 4.3E-03    | 8.3E-01    | 6.0E-04    | 1.0E+00    | 9.9E-05    | 7.8E-01    | 2.0E-02    |
| 265116  | 1.5E-07 | 2.2E-07 | 1.1E-04    | 2.6E-01    | 1.5E-01    | 8.5E-08    | 9.7E-01    | 9.8E-01    | 4.5E-06    | 8.3E-01    | 8.1E-05    | 6.5E-01    | 9.7E-06    |
| 184753  | 1.5E-07 | 2.2E-07 | 1.1E-04    | 1.2E-05    | 1.2E-06    | 5.0E-01    | 6.4E-01    | 7.3E-01    | 2.4E-02    | 2.2E-02    | 2.6E-03    | 2.6E-03    | 1.0E+00    |
| 637934  | 1.7E-07 | 2.5E-07 | 1.2E-04    | 2.6E-05    | 1.8E-05    | 1.8E-07    | 2.8E-04    | 9.7E-01    | 8.1E-02    | 9.8E-01    | 3.1E-01    | 1.0E+00    | 4.7E-01    |
| 267406  | 1.7E-07 | 2.5E-07 | 1.2E-04    | 1.7E-01    | 9.9E-03    | 2.0E-07    | 1.0E+00    | 5.4E-01    | 2.4E-05    | 5.4E-01    | 4.8E-03    | 8.1E-02    | 8.2E-06    |
| 185519  | 1.7E-07 | 2.5E-07 | 1.2E-04    | 1.5E-02    | 4.6E-03    | 5.3E-08    | 6.2E-04    | 9.3E-01    | 1.4E-04    | 3.0E-01    | 3.2E-03    | 7.3E-01    | 2.0E-01    |
| 10518   | 1.8E-07 | 2.6E-07 | 1.3E-04    | 3.3E-04    | 3.2E-05    | 1.0E+00    | 1.0E+00    | 7.4E-01    | 1.5E-03    | 2.8E-03    | 1.6E-04    | 3.0E-04    | 1.0E+00    |
| 4446120 | 1.8E-07 | 2.6E-07 | 1.3E-04    | 1.8E-02    | 6.3E-02    | 3.4E-08    | 4.8E-03    | 1.0E+00    | 7.7E-05    | 7.0E-01    | 1.2E-04    | 6.2E-01    | 4.2E-02    |
| 299600  | 1.8E-07 | 2.6E-07 | 1.3E-04    | 8.9E-03    | 6.1E-06    | 2.0E-05    | 1.0E+00    | 4.8E-02    | 5.4E-02    | 8.6E-02    | 1.0E+00    | 2.5E-04    | 3.9E-04    |
| 194944  | 1.8E-07 | 2.6E-07 | 1.3E-04    | 1.3E-03    | 2.5E-05    | 1.9E-07    | 2.9E-01    | 4.3E-01    | 5.3E-03    | 6.8E-01    | 2.7E-01    | 9.6E-02    | 1.4E-03    |
| 4383135 | 1.9E-07 | 2.7E-07 | 1.4E-04    | 3.0E-01    | 3.7E-06    | 4.0E-04    | 1.0E+00    | 2.6E-04    | 2.0E-02    | 5.6E-01    | 9.6E-01    | 8.8E-05    | 2.8E-03    |
| 346275  | 2.0E-07 | 2.8E-07 | 1.4E-04    | 4.0E-02    | 4.1E-04    | 1.3E-07    | 5.8E-01    | 2.6E-01    | 1.2E-04    | 9.1E-01    | 4.5E-02    | 1.4E-01    | 2.2E-04    |
| 3197419 | 2.2E-07 | 3.1E-07 | 1.5E-04    | 1.4E-06    | 5.3E-05    | 1.9E-06    | 4.3E-05    | 9.8E-01    | 7.6E-01    | 9.9E-01    | 5.2E-01    | 9.1E-01    | 9.8E-01    |
| 2978254 | 2.3E-07 | 3.2E-07 | 1.6E-04    | 6.6E-06    | 3.8E-07    | 8.6E-06    | 1.9E-03    | 6.1E-01    | 8.0E-01    | 9.9E-01    | 1.0E+00    | 5.7E-01    | 7.1E-01    |
| 340600  | 2.3E-07 | 3.3E-07 | 1.6E-04    | 1.1E-01    | 1.0E+00    | 5.4E-07    | 1.4E-01    | 1.4E-01    | 1.3E-04    | 9.9E-01    | 4.9E-07    | 1.8E-01    | 9.0E-03    |
| 771140  | 2.5E-07 | 3.6E-07 | 1.8E-04    | 6.9E-02    | 9.3E-01    | 3.3E-07    | 9.6E-01    | 3.3E-01    | 1.5E-04    | 5.5E-01    | 2.2E-06    | 1.0E+00    | 3.8E-05    |
| 229455  | 2.7E-07 | 3.8E-07 | 1.9E-04    | 3.4E-03    | 2.5E-05    | 2.9E-06    | 1.2E-05    | 2.5E-01    | 2.4E-02    | 5.6E-02    | 7.2E-01    | 8.4E-01    | 1.0E+00    |
| 303251  | 2.7E-07 | 3.8E-07 | 1.9E-04    | 6.9E-04    | 5.4E-04    | 8.3E-01    | 1.0E+00    | 9.9E-01    | 5.8E-05    | 4.9E-03    | 4.9E-05    | 3.1E-03    | 8.8E-01    |
| 177512  | 2.7E-07 | 3.8E-07 | 1.9E-04    | 2.9E-04    | 1.8E-05    | 2.3E-01    | 5.9E-07    | 6.6E-01    | 4.3E-01    | 2.9E-02    | 7.1E-02    | 3.8E-01    | 2.0E-03    |
| 148671  | 2.8E-07 | 4.0E-07 | 2.0E-04    | 4.8E-02    | 4.3E-05    | 4.0E-07    | 1.7E-01    | 4.5E-02    | 3.0E-04    | 1.0E+00    | 3.0E-01    | 2.3E-01    | 5.9E-03    |
| 310407  | 3.0E-07 | 4.1E-07 | 2.1E-04    | 2.9E-03    | 9.6E-01    | 7.3E-07    | 1.4E-01    | 1.7E-02    | 8.7E-03    | 9.6E-01    | 3.5E-06    | 3.6E-01    | 1.2E-02    |
| 270513  | 3.1E-07 | 4.3E-07 | 2.2E-04    | 7.1E-01    | 3.2E-06    | 7.2E-04    | 5.8E-01    | 1.7E-05    | 5.7E-03    | 9.8E-01    | 9.0E-01    | 6.5E-03    | 1.1E-01    |
| 174571  | 3.2E-07 | 4.4E-07 | 2.2E-04    | 1.3E-06    | 7.2E-03    | 5.3E-06    | 7.6E-05    | 1.5E-01    | 9.1E-01    | 1.0E+00    | 7.5E-02    | 2.8E-01    | 9.9E-01    |
| 335267  | 3.2E-07 | 4.4E-07 | 2.2E-04    | 8.6E-04    | 3.3E-04    | 1.6E-07    | 1.8E-04    | 9.5E-01    | 6.3E-03    | 5.3E-01    | 6.0E-02    | 8.9E-01    | 5.2E-01    |
| 259275  | 3.4E-07 | 4.8E-07 | 2.4E-04    | 1.2E-03    | 2.6E-05    | 1.9E-07    | 7.4E-03    | 4.4E-01    | 5.4E-03    | 1.0E+00    | 2.7E-01    | 8.8E-01    | 8.1E-02    |
| 4459184 | 3.5E-07 | 4.8E-07 | 2.4E-04    | 2.7E-02    | 1.8E-01    | 4.2E-07    | 1.0E+00    | 9.7E-01    | 6.0E-04    | 8.2E-02    | 2.9E-04    | 3.0E-01    | 4.7E-06    |
| 272953  | 3.5E-07 | 4.9E-07 | 2.5E-04    | 5.0E-06    | 1.4E-02    | 1.4E-06    | 2.0E-04    | 2.0E-01    | 5.0E-01    | 1.0E+00    | 1.7E-02    | 3.2E-01    | 8.2E-01    |
| 180476  | 3.6E-07 | 4.9E-07 | 2.5E-04    | 3.0E-05    | 8.1E-02    | 1.9E-06    | 9.7E-05    | 1.1E-01    | 3.0E-01    | 8.9E-01    | 3.5E-03    | 6.3E-02    | 9.3E-01    |
| 4483585 | 3.6E-07 | 4.9E-07 | 2.5E-04    | 6.5E-02    | 2.5E-01    | 2.4E-07    | 1.0E+00    | 9.9E-01    | 1.2E-04    | 3.1E-01    | 9.9E-05    | 6.0E-01    | 9.0E-06    |
| 4405128 | 3.6E-07 | 4.9E-07 | 2.5E-04    | 2.9E-03    | 4.9E-06    | 9.9E-01    | 1.1E-01    | 1.0E-01    | 2.2E-03    | 9.8E-01    | 6.1E-06    | 1.2E-01    | 6.7E-02    |
| 271822  | 3.8E-07 | 5.2E-07 | 2.6E-04    | 2.2E-04    | 2.0E-06    | 1.3E-06    | 4.7E-03    | 3.0E-01    | 8.5E-02    | 1.0E+00    | 9.1E-01    | 6.3E-01    | 2.7E-01    |
| 186073  | 4.0E-07 | 5.5E-07 | 2.8E-04    | 4.7E-04    | 4.3E-04    | 1.7E-07    | 2.9E-04    | 9.9E-01    | 1.1E-02    | 7.3E-01    | 5.1E-02    | 9.2E-01    | 4.4E-01    |
| 184329  | 4.2E-07 | 5.7E-07 | 2.9E-04    | 8.2E-04    | 5.3E-06    | 5.6E-02    | 1.1E-06    | 2.5E-01    | 9.5E-01    | 2.5E-02    | 1.6E-01    | 6.8E-01    | 1.8E-02    |
| 174285  | 4.3E-07 | 5.8E-07 | 3.0E-04    | 1.9E-01    | 1.2E-01    | 1.7E-07    | 9.2E-03    | 9.9E-01    | 1.6E-05    | 3.2E-01    | 2.4E-04    | 6.2E-01    | 6.4E-02    |
| 190026  | 4.4E-07 | 6.0E-07 | 3.1E-04    | 1.9E-02    | 1.0E+00    | 1.0E+00    | 8.5E-06    | 1.1E-02    | 4.4E-02    | 1.1E-02    | 1.0E+00    | 4.5E-06    | 3.1E-05    |
| 4449518 | 4.8E-07 | 6.5E-07 | 3.4E-04    | 6.7E-04    | 1.1E-02    | 9.7E-01    | 4.2E-05    | 9.7E-01    | 3.1E-04    | 3.1E-01    | 4.3E-03    | 1.6E-01    | 2.0E-05    |

Table S4

| ID      | Pr      | FDR     | Bonferroni | Tukey P.A. | Tukey R.A. | Tukey T.A. | Tukey W.A. | Tukey R.P. | Tukey T.P. | Tukey W.P. | Tukey T.R. | Tukey W.R. | Tukey W.T. |
|---------|---------|---------|------------|------------|------------|------------|------------|------------|------------|------------|------------|------------|------------|
| 561069  | 4.8E-07 | 6.5E-07 | 3.4E-04    | 1.0E-04    | 2.7E-06    | 1.7E-06    | 5.0E-03    | 4.8E-01    | 1.6E-01    | 1.0E+00    | 9.2E-01    | 6.6E-01    | 3.0E-01    |
| 181419  | 4.8E-07 | 6.5E-07 | 3.4E-04    | 1.5E-03    | 1.4E-03    | 7.8E-08    | 5.0E-03    | 9.9E-01    | 2.1E-03    | 9.8E-01    | 1.2E-02    | 1.0E+00    | 6.5E-02    |
| 14035   | 4.8E-07 | 6.5E-07 | 3.4E-04    | 5.1E-04    | 7.2E-07    | 2.2E-02    | 9.6E-01    | 9.5E-02    | 9.9E-01    | 3.2E-02    | 1.2E-01    | 1.5E-04    | 2.0E-01    |
| 319165  | 4.9E-07 | 6.6E-07 | 3.4E-04    | 4.0E-05    | 8.9E-04    | 1.6E-07    | 9.6E-03    | 9.8E-01    | 5.6E-02    | 9.8E-01    | 3.0E-02    | 1.0E+00    | 6.0E-02    |
| 195445  | 5.1E-07 | 6.9E-07 | 3.6E-04    | 2.6E-01    | 1.6E-05    | 2.9E-04    | 1.0E+00    | 1.6E-03    | 1.8E-02    | 4.2E-01    | 1.0E+00    | 1.7E-04    | 1.4E-03    |
| 194504  | 6.0E-07 | 8.1E-07 | 4.3E-04    | 1.6E-01    | 1.2E-02    | 6.1E-07    | 9.9E-01    | 5.9E-01    | 8.3E-05    | 5.6E-01    | 1.0E-02    | 1.0E-01    | 2.5E-05    |
| 174260  | 6.9E-07 | 9.2E-07 | 4.9E-04    | 9.6E-03    | 1.5E-05    | 2.9E-05    | 2.3E-05    | 8.9E-02    | 6.7E-02    | 4.4E-02    | 9.9E-01    | 9.5E-01    | 1.0E+00    |
| 188266  | 7.7E-07 | 1.0E-06 | 5.4E-04    | 8.4E-02    | 1.7E-05    | 5.1E-06    | 2.2E-01    | 9.9E-03    | 1.8E-03    | 1.0E+00    | 8.6E-01    | 1.1E-01    | 2.3E-02    |
| 258421  | 7.8E-07 | 1.0E-06 | 5.5E-04    | 5.1E-05    | 2.6E-03    | 1.0E+00    | 9.5E-04    | 9.1E-01    | 1.2E-04    | 1.0E+00    | 3.4E-03    | 8.8E-01    | 1.1E-03    |
| 273687  | 8.0E-07 | 1.1E-06 | 5.6E-04    | 4.8E-02    | 2.7E-04    | 4.6E-07    | 1.7E-01    | 1.7E-01    | 3.4E-04    | 1.0E+00    | 1.3E-01    | 4.7E-01    | 6.3E-03    |
| 184966  | 8.9E-07 | 1.2E-06 | 6.3E-04    | 2.7E-01    | 1.9E-01    | 6.1E-07    | 1.0E+00    | 9.9E-01    | 3.6E-05    | 6.5E-01    | 3.7E-04    | 5.1E-01    | 1.9E-05    |
| 4460604 | 9.3E-07 | 1.2E-06 | 6.6E-04    | 8.4E-01    | 6.7E-03    | 8.5E-06    | 1.0E+00    | 3.0E-02    | 2.5E-05    | 9.5E-01    | 1.1E-01    | 3.3E-02    | 9.4E-05    |
| 157999  | 9.4E-07 | 1.2E-06 | 6.6E-04    | 2.5E-04    | 2.9E-03    | 7.4E-07    | 6.2E-01    | 9.9E-01    | 5.4E-02    | 1.4E-01    | 3.7E-02    | 3.4E-01    | 7.6E-04    |
| 178068  | 9.5E-07 | 1.3E-06 | 6.7E-04    | 1.9E-02    | 3.7E-02    | 8.9E-01    | 3.6E-07    | 1.0E+00    | 3.6E-01    | 6.0E-04    | 4.2E-01    | 1.5E-03    | 3.3E-05    |
| 191067  | 9.6E-07 | 1.3E-06 | 6.7E-04    | 1.2E-03    | 1.1E-01    | 5.7E-05    | 2.6E-06    | 6.0E-01    | 3.3E-01    | 3.5E-02    | 4.0E-02    | 2.6E-03    | 8.6E-01    |
| 2154095 | 1.0E-06 | 1.3E-06 | 7.0E-04    | 2.2E-04    | 1.4E-05    | 1.8E-06    | 1.4E-03    | 6.6E-01    | 1.1E-01    | 9.8E-01    | 7.3E-01    | 9.8E-01    | 5.3E-01    |
| 4402834 | 1.0E-06 | 1.3E-06 | 7.0E-04    | 2.6E-01    | 6.9E-04    | 7.1E-06    | 1.0E+00    | 5.6E-02    | 5.0E-04    | 6.2E-01    | 3.4E-01    | 9.8E-03    | 1.5E-04    |
| 247557  | 1.2E-06 | 1.5E-06 | 8.2E-04    | 1.9E-02    | 8.6E-05    | 3.2E-06    | 3.8E-04    | 1.7E-01    | 5.9E-03    | 2.0E-01    | 5.3E-01    | 1.0E+00    | 8.3E-01    |
| 113978  | 1.3E-06 | 1.7E-06 | 8.9E-04    | 1.4E-01    | 1.3E-05    | 1.0E+00    | 1.0E+00    | 3.9E-03    | 1.8E-01    | 2.2E-01    | 5.2E-05    | 1.1E-04    | 1.0E+00    |
| 2645488 | 1.3E-06 | 1.7E-06 | 8.9E-04    | 4.9E-01    | 3.1E-04    | 2.5E-05    | 2.0E-03    | 8.0E-03    | 5.1E-04    | 3.5E-02    | 6.9E-01    | 1.0E+00    | 8.4E-01    |
| 4417539 | 1.4E-06 | 1.8E-06 | 9.7E-04    | 6.7E-01    | 1.0E+00    | 1.6E-04    | 1.1E-03    | 4.8E-01    | 1.5E-03    | 1.0E-02    | 4.9E-05    | 4.0E-04    | 1.0E+00    |
| 273928  | 1.4E-06 | 1.8E-06 | 9.9E-04    | 5.6E-04    | 3.7E-04    | 3.8E-07    | 2.7E-02    | 9.8E-01    | 1.9E-02    | 1.0E+00    | 9.7E-02    | 9.4E-01    | 4.3E-02    |
| 177917  | 1.4E-06 | 1.8E-06 | 1.0E-03    | 9.9E-03    | 9.1E-05    | 8.9E-05    | 7.6E-06    | 2.8E-01    | 1.4E-01    | 1.8E-02    | 9.7E-01    | 5.7E-01    | 9.2E-01    |
| 259870  | 1.5E-06 | 2.0E-06 | 1.1E-03    | 9.2E-02    | 9.9E-01    | 3.4E-06    | 2.3E-02    | 2.3E-01    | 1.1E-03    | 7.3E-01    | 9.1E-06    | 5.7E-02    | 1.6E-01    |
| 405780  | 1.5E-06 | 2.0E-06 | 1.1E-03    | 9.9E-04    | 5.9E-01    | 1.0E+00    | 3.0E-05    | 6.5E-02    | 3.8E-03    | 2.1E-01    | 6.7E-01    | 1.3E-03    | 9.9E-05    |
| 175485  | 1.6E-06 | 2.0E-06 | 1.1E-03    | 5.0E-05    | 2.1E-06    | 3.6E-01    | 1.9E-01    | 5.7E-01    | 1.1E-01    | 3.4E-01    | 7.9E-03    | 4.2E-02    | 9.9E-01    |
| 307416  | 1.6E-06 | 2.1E-06 | 1.1E-03    | 3.9E-03    | 1.0E+00    | 2.4E-01    | 2.0E-05    | 2.8E-03    | 8.4E-01    | 7.4E-02    | 2.4E-01    | 1.4E-05    | 2.5E-02    |
| 4466275 | 1.6E-06 | 2.1E-06 | 1.1E-03    | 1.7E-03    | 5.0E-04    | 4.6E-07    | 4.1E-03    | 9.2E-01    | 9.2E-03    | 9.6E-01    | 9.1E-02    | 1.0E+00    | 1.9E-01    |
| 4481506 | 1.8E-06 | 2.4E-06 | 1.3E-03    | 8.4E-01    | 9.9E-01    | 9.7E-01    | 2.2E-05    | 4.8E-01    | 4.8E-01    | 7.2E-05    | 1.0E+00    | 2.6E-06    | 9.2E-06    |
| 172163  | 1.9E-06 | 2.4E-06 | 1.3E-03    | 3.4E-04    | 2.9E-05    | 1.0E+00    | 5.0E-03    | 7.2E-01    | 4.9E-03    | 1.0E+00    | 4.6E-04    | 9.3E-01    | 2.3E-02    |
| 180235  | 1.9E-06 | 2.5E-06 | 1.4E-03    | 1.5E-01    | 9.8E-03    | 1.8E-06    | 1.2E-03    | 5.8E-01    | 3.1E-04    | 9.9E-02    | 2.8E-02    | 7.2E-01    | 5.6E-01    |
| 3265889 | 2.0E-06 | 2.5E-06 | 1.4E-03    | 5.8E-05    | 2.2E-02    | 1.5E-01    | 1.9E-06    | 4.5E-01    | 3.2E-01    | 1.7E-01    | 9.9E-01    | 1.0E-02    | 8.5E-03    |
| 204171  | 2.0E-06 | 2.5E-06 | 1.4E-03    | 1.1E-03    | 9.8E-06    | 1.1E-05    | 6.7E-04    | 2.9E-01    | 1.4E-01    | 7.6E-01    | 9.7E-01    | 1.0E+00    | 9.0E-01    |
| 310760  | 2.0E-06 | 2.6E-06 | 1.4E-03    | 2.0E-05    | 6.9E-04    | 2.7E-06    | 1.5E-03    | 9.6E-01    | 4.2E-01    | 1.0E+00    | 2.1E-01    | 9.9E-01    | 5.8E-01    |
| 181348  | 2.1E-06 | 2.7E-06 | 1.5E-03    | 1.8E-03    | 1.6E-02    | 6.7E-06    | 2.7E-05    | 9.9E-01    | 7.3E-02    | 1.5E-01    | 4.8E-02    | 9.6E-02    | 1.0E+00    |
| 175227  | 2.3E-06 | 3.0E-06 | 1.6E-03    | 2.8E-01    | 2.0E-02    | 1.1E-06    | 1.9E-02    | 5.4E-01    | 6.2E-05    | 3.7E-01    | 1.0E-02    | 9.8E-01    | 1.1E-01    |
| 4207913 | 2.4E-06 | 3.0E-06 | 1.7E-03    | 3.0E-04    | 6.7E-07    | 5.2E-02    | 2.3E-01    | 1.3E-01    | 8.7E-01    | 5.3E-01    | 5.3E-02    | 1.5E-02    | 9.8E-01    |
| 184456  | 2.5E-06 | 3.1E-06 | 1.7E-03    | 1.3E-02    | 8.5E-03    | 8.0E-01    | 1.1E-06    | 9.9E-01    | 4.1E-01    | 2.6E-03    | 2.7E-01    | 1.6E-02    | 1.7E-04    |
| 838685  | 2.5E-06 | 3.1E-06 | 1.7E-03    | 3.9E-02    | 1.0E+00    | 3.1E-04    | 2.1E-03    | 1.1E-02    | 1.3E-01    | 3.6E-01    | 7.6E-05    | 6.4E-04    | 1.0E+00    |
| 199403  | 3.0E-06 | 3.8E-06 | 2.1E-03    | 6.8E-05    | 2.4E-04    | 1.0E+00    | 8.4E-03    | 1.0E+00    | 1.3E-03    | 9.9E-01    | 2.7E-03    | 9.9E-01    | 3.5E-02    |
| 265992  | 3.0E-06 | 3.8E-06 | 2.1E-03    | 3.0E-01    | 5.3E-06    | 1.1E-03    | 1.8E-01    | 3.7E-04    | 4.5E-02    | 9.3E-01    | 9.0E-01    | 7.4E-02    | 4.8E-01    |
| 263705  | 3.0E-06 | 3.8E-06 | 2.1E-03    | 1.1E-02    | 1.7E-04    | 1.8E-06    | 1.1E-01    | 3.7E-01    | 6.0E-03    | 1.0E+00    | 3.3E-01    | 5.4E-01    | 2.7E-02    |
| 376862  | 3.4E-06 | 4.3E-06 | 2.4E-03    | 6.5E-01    | 1.4E-03    | 1.2E-05    | 2.1E-01    | 1.7E-02    | 1.1E-04    | 7.4E-01    | 3.1E-01    | 6.8E-01    | 4.3E-02    |
| 4420272 | 3.6E-06 | 4.5E-06 | 2.5E-03    | 1.6E-03    | 1.3E-01    | 2.8E-06    | 8.4E-01    | 5.8E-01    | 4.2E-02    | 1.6E-01    | 2.7E-03    | 8.4E-01    | 6.7E-04    |
| 179343  | 3.7E-06 | 4.6E-06 | 2.6E-03    | 4.4E-03    | 3.6E-04    | 1.3E-04    | 9.5E-06    | 7.2E-01    | 2.8E-01    | 3.9E-02    | 9.1E-01    | 4.0E-01    | 9.1E-01    |
| 174651  | 3.8E-06 | 4.7E-06 | 2.7E-03    | 1.1E-01    | 4.6E-03    | 1.7E-04    | 1.4E-05    | 5.0E-01    | 3.3E-02    | 3.0E-03    | 5.6E-01    | 1.4E-01    | 9.2E-01    |
| 261409  | 4.2E-06 | 5.2E-06 | 2.9E-03    | 3.9E-01    | 4.9E-06    | 5.2E-03    | 2.5E-01    | 1.8E-04    | 1.2E-01    | 9.4E-01    | 6.1E-01    | 4.7E-02    | 6.7E-01    |
| 185614  | 4.3E-06 | 5.3E-06 | 3.0E-03    | 2.9E-03    | 4.1E-05    | 2.9E-01    | 1.7E-05    | 3.7E-01    | 7.2E-01    | 8.1E-02    | 8.0E-02    | 8.2E-01    | 1.7E-02    |
| 190242  | 4.4E-06 | 5.4E-06 | 3.1E-03    | 6.4E-02    | 6.0E-06    | 2.7E-04    | 2.7E-01    | 5.4E-03    | 7.8E-02    | 1.0E+00    | 9.9E-01    | 4.6E-02    | 1.9E-01    |
| 166099  | 4.6E-06 | 5.7E-06 | 3.2E-03    | 1.6E-01    | 3.2E-05    | 5.3E-04    | 9.7E-01    | 7.6E-03    | 5.6E-02    | 6.8E-01    | 1.0E+00    | 2.3E-03    | 1.2E-02    |
| 4355436 | 4.6E-06 | 5.7E-06 | 3.3E-03    | 7.1E-02    | 1.9E-01    | 7.6E-07    | 1.7E-01    | 1.0E+00    | 3.4E-04    | 1.0E+00    | 4.7E-04    | 9.9E-01    | 8.9E-03    |
| 1678333 | 4.7E-06 | 5.8E-06 | 3.3E-03    | 2.1E-02    | 3.8E-04    | 6.0E-06    | 6.8E-01    | 3.8E-01    | 9.5E-03    | 7.2E-01    | 4.0E-01    | 9.6E-02    | 2.9E-03    |

Table S4

| ID      | Pr      | FDR     | Bonferroni | Tukey P.A. | Tukey R.A. | Tukey T.A. | Tukey W.A. | Tukey R.P. | Tukey T.P. | Tukey W.P. | Tukey T.R. | Tukey W.R. | Tukey W.T. |
|---------|---------|---------|------------|------------|------------|------------|------------|------------|------------|------------|------------|------------|------------|
| 267502  | 5.1E-06 | 6.3E-06 | 3.6E-03    | 4.0E-02    | 9.8E-01    | 8.0E-05    | 1.3E-03    | 1.2E-01    | 4.6E-02    | 2.7E-01    | 2.4E-04    | 3.7E-03    | 9.8E-01    |
| 274095  | 5.5E-06 | 6.8E-06 | 3.9E-03    | 8.8E-02    | 1.9E-02    | 2.0E-06    | 5.6E-03    | 8.7E-01    | 6.8E-04    | 4.0E-01    | 1.7E-02    | 8.8E-01    | 3.0E-01    |
| 828435  | 6.6E-06 | 8.0E-06 | 4.6E-03    | 1.2E-01    | 3.6E-04    | 1.9E-04    | 1.0E+00    | 9.2E-02    | 3.3E-02    | 2.3E-01    | 9.4E-01    | 2.3E-03    | 9.4E-04    |
| 322991  | 7.4E-06 | 9.1E-06 | 5.2E-03    | 1.2E-02    | 2.0E-05    | 9.9E-05    | 1.5E-03    | 9.2E-02    | 1.4E-01    | 5.1E-01    | 1.0E+00    | 9.9E-01    | 9.8E-01    |
| 771177  | 7.5E-06 | 9.1E-06 | 5.3E-03    | 3.9E-03    | 6.4E-01    | 9.7E-05    | 3.2E-04    | 1.4E-01    | 2.6E-01    | 3.9E-01    | 3.5E-03    | 9.0E-03    | 1.0E+00    |
| 179427  | 8.5E-06 | 1.0E-05 | 5.9E-03    | 1.0E-03    | 2.6E-04    | 2.9E-01    | 1.4E-05    | 9.1E-01    | 5.3E-01    | 1.3E-01    | 2.2E-01    | 5.2E-01    | 1.5E-02    |
| 310751  | 9.0E-06 | 1.1E-05 | 6.3E-03    | 4.9E-02    | 5.4E-03    | 9.5E-06    | 9.7E-01    | 7.5E-01    | 6.0E-03    | 4.1E-01    | 1.3E-01    | 9.3E-02    | 4.8E-04    |
| 315147  | 9.6E-06 | 1.2E-05 | 6.7E-03    | 4.7E-01    | 9.8E-01    | 1.0E+00    | 1.3E-05    | 8.3E-01    | 6.6E-01    | 2.7E-04    | 9.9E-01    | 4.4E-05    | 6.8E-05    |
| 264345  | 9.5E-06 | 1.2E-05 | 6.7E-03    | 1.6E-03    | 1.0E+00    | 1.0E+00    | 5.0E-03    | 8.0E-04    | 5.8E-03    | 9.8E-01    | 1.0E+00    | 3.5E-03    | 1.0E-02    |
| 186338  | 9.8E-06 | 1.2E-05 | 6.9E-03    | 1.0E-02    | 5.4E-01    | 5.1E-01    | 4.6E-06    | 3.8E-01    | 6.9E-01    | 1.1E-02    | 1.0E+00    | 2.9E-04    | 2.2E-03    |
| 4433554 | 1.0E-05 | 1.2E-05 | 7.1E-03    | 6.2E-02    | 5.9E-05    | 1.0E+00    | 9.9E-01    | 4.3E-02    | 8.8E-02    | 3.7E-01    | 1.8E-04    | 2.4E-03    | 9.8E-01    |
| 170335  | 1.0E-05 | 1.3E-05 | 7.4E-03    | 3.7E-03    | 1.7E-04    | 1.0E+00    | 2.2E-01    | 6.0E-01    | 3.4E-03    | 9.1E-01    | 1.9E-04    | 3.3E-01    | 1.5E-01    |
| 195337  | 1.2E-05 | 1.4E-05 | 8.1E-03    | 1.6E-01    | 1.1E-01    | 4.5E-06    | 9.6E-01    | 9.9E-01    | 6.9E-04    | 7.4E-01    | 5.0E-03    | 5.9E-01    | 3.4E-04    |
| 593043  | 1.3E-05 | 1.6E-05 | 9.1E-03    | 1.0E+00    | 2.7E-03    | 5.5E-02    | 8.8E-01    | 2.1E-04    | 1.6E-02    | 9.0E-01    | 9.7E-01    | 5.6E-04    | 1.1E-02    |
| 188116  | 1.3E-05 | 1.6E-05 | 9.2E-03    | 2.9E-03    | 1.9E-01    | 1.3E-05    | 1.6E-03    | 5.8E-01    | 8.9E-02    | 7.8E-01    | 6.4E-03    | 1.9E-01    | 8.0E-01    |
| 259846  | 1.3E-05 | 1.6E-05 | 9.2E-03    | 2.2E-04    | 3.4E-01    | 4.0E-05    | 3.4E-01    | 6.5E-02    | 5.4E-01    | 3.4E-01    | 6.3E-03    | 1.0E+00    | 4.8E-02    |
| 176242  | 1.4E-05 | 1.7E-05 | 9.9E-03    | 1.8E-01    | 3.5E-03    | 8.0E-05    | 1.0E+00    | 2.9E-01    | 9.0E-03    | 3.2E-01    | 4.8E-01    | 1.4E-02    | 4.5E-04    |
| 4470092 | 1.5E-05 | 1.8E-05 | 1.0E-02    | 1.8E-03    | 9.4E-02    | 2.3E-05    | 9.6E-01    | 7.1E-01    | 1.7E-01    | 7.3E-02    | 2.3E-02    | 5.5E-01    | 1.3E-03    |
| 258423  | 1.6E-05 | 1.9E-05 | 1.1E-02    | 4.2E-02    | 5.8E-01    | 3.4E-05    | 1.0E+00    | 6.7E-01    | 2.2E-02    | 7.3E-02    | 1.8E-03    | 5.8E-01    | 1.2E-04    |
| 295075  | 1.6E-05 | 2.0E-05 | 1.2E-02    | 4.5E-03    | 6.4E-05    | 5.5E-05    | 2.4E-01    | 3.6E-01    | 1.7E-01    | 9.1E-01    | 9.7E-01    | 2.0E-01    | 9.3E-02    |
| 289709  | 1.9E-05 | 2.2E-05 | 1.3E-02    | 4.2E-02    | 7.6E-05    | 7.3E-04    | 5.7E-04    | 7.8E-02    | 2.1E-01    | 1.6E-01    | 1.0E+00    | 1.0E+00    | 1.0E+00    |
| 4296218 | 1.9E-05 | 2.3E-05 | 1.4E-02    | 4.7E-02    | 5.2E-05    | 9.9E-01    | 8.6E-03    | 5.3E-02    | 2.3E-01    | 6.3E-01    | 9.6E-04    | 9.2E-01    | 4.2E-02    |
| 185126  | 1.9E-05 | 2.3E-05 | 1.4E-02    | 8.0E-04    | 5.4E-04    | 4.0E-02    | 1.0E+00    | 9.8E-01    | 9.8E-01    | 3.5E-03    | 8.7E-01    | 2.0E-03    | 6.0E-02    |
| 189288  | 2.0E-05 | 2.3E-05 | 1.4E-02    | 2.0E-04    | 5.9E-04    | 3.7E-04    | 1.2E-04    | 1.0E+00    | 9.3E-01    | 6.8E-01    | 9.6E-01    | 7.7E-01    | 9.9E-01    |
| 134065  | 2.2E-05 | 2.6E-05 | 1.5E-02    | 3.4E-03    | 3.5E-04    | 8.8E-01    | 2.9E-04    | 7.6E-01    | 1.4E-01    | 4.0E-01    | 2.2E-02    | 9.4E-01    | 1.0E-02    |
| 331411  | 2.3E-05 | 2.7E-05 | 1.6E-02    | 6.2E-02    | 7.2E-06    | 3.3E-02    | 9.5E-03    | 6.7E-03    | 9.1E-01    | 5.9E-01    | 2.7E-01    | 6.7E-01    | 9.8E-01    |
| 4402042 | 2.6E-05 | 3.0E-05 | 1.8E-02    | 9.7E-01    | 4.8E-03    | 3.3E-04    | 3.0E-01    | 6.8E-03    | 4.2E-04    | 5.0E-01    | 6.9E-01    | 7.5E-01    | 1.9E-01    |
| 196746  | 2.6E-05 | 3.0E-05 | 1.8E-02    | 1.7E-03    | 6.4E-04    | 4.0E-01    | 4.7E-05    | 9.5E-01    | 4.9E-01    | 2.1E-01    | 2.3E-01    | 5.9E-01    | 2.1E-02    |
| 68844   | 2.6E-05 | 3.1E-05 | 1.9E-02    | 2.5E-01    | 2.3E-05    | 5.0E-03    | 6.8E-02    | 2.4E-03    | 1.9E-01    | 7.5E-01    | 8.4E-01    | 3.7E-01    | 9.4E-01    |
| 313724  | 2.7E-05 | 3.2E-05 | 1.9E-02    | 5.3E-04    | 8.7E-01    | 5.7E-01    | 5.6E-04    | 8.3E-03    | 1.8E-01    | 8.3E-01    | 9.6E-01    | 5.3E-03    | 6.4E-02    |
| 198604  | 2.8E-05 | 3.2E-05 | 1.9E-02    | 1.4E-03    | 1.2E-04    | 2.2E-04    | 8.4E-04    | 7.3E-01    | 5.7E-01    | 7.6E-01    | 9.9E-01    | 1.0E+00    | 1.0E+00    |
| 3957916 | 3.2E-05 | 3.7E-05 | 2.3E-02    | 2.8E-03    | 2.5E-04    | 5.5E-05    | 2.6E-01    | 7.3E-01    | 2.2E-01    | 8.4E-01    | 8.5E-01    | 3.2E-01    | 8.3E-02    |
| 4471130 | 3.2E-05 | 3.7E-05 | 2.3E-02    | 6.7E-03    | 4.6E-05    | 2.0E-04    | 1.4E-01    | 2.4E-01    | 2.9E-01    | 9.9E-01    | 1.0E+00    | 2.7E-01    | 2.9E-01    |
| 183829  | 4.1E-05 | 4.8E-05 | 2.9E-02    | 2.3E-04    | 2.0E-02    | 1.0E+00    | 3.0E-02    | 7.4E-01    | 1.4E-03    | 9.7E-01    | 5.1E-02    | 1.0E+00    | 5.8E-02    |
| 190114  | 4.4E-05 | 5.1E-05 | 3.1E-02    | 1.6E-03    | 1.0E+00    | 7.8E-02    | 2.5E-03    | 2.6E-03    | 9.6E-01    | 9.2E-01    | 1.2E-01    | 4.1E-03    | 7.1E-01    |
| 175080  | 4.7E-05 | 5.5E-05 | 3.3E-02    | 2.6E-02    | 2.5E-05    | 7.9E-01    | 3.1E-02    | 5.3E-02    | 5.6E-01    | 9.6E-01    | 5.5E-03    | 5.8E-01    | 3.8E-01    |
| 196672  | 5.6E-05 | 6.5E-05 | 3.9E-02    | 4.0E-02    | 5.5E-03    | 1.7E-01    | 1.7E-05    | 8.0E-01    | 1.0E+00    | 1.0E-02    | 8.7E-01    | 1.4E-01    | 3.4E-02    |
| 429917  | 6.3E-05 | 7.3E-05 | 4.5E-02    | 1.1E-03    | 4.6E-01    | 9.0E-01    | 4.5E-04    | 1.1E-01    | 6.2E-02    | 6.9E-01    | 9.8E-01    | 2.4E-02    | 1.3E-02    |
| 1108599 | 6.6E-05 | 7.6E-05 | 4.6E-02    | 3.9E-02    | 3.2E-01    | 3.0E-01    | 9.8E-01    | 9.1E-01    | 1.2E-04    | 2.4E-02    | 3.5E-03    | 1.8E-01    | 7.3E-01    |
| 262677  | 6.7E-05 | 7.7E-05 | 4.7E-02    | 5.4E-02    | 1.6E-03    | 3.9E-05    | 1.0E-01    | 4.4E-01    | 1.9E-02    | 1.0E+00    | 4.9E-01    | 8.8E-01    | 1.8E-01    |
| 171079  | 7.3E-05 | 8.4E-05 | 5.2E-02    | 4.3E-02    | 2.3E-03    | 3.3E-05    | 1.8E-01    | 5.9E-01    | 2.1E-02    | 1.0E+00    | 3.9E-01    | 8.1E-01    | 9.7E-02    |
| 259631  | 8.1E-05 | 9.3E-05 | 5.7E-02    | 1.4E-02    | 1.3E-01    | 2.1E-05    | 3.2E-02    | 9.5E-01    | 4.0E-02    | 9.9E-01    | 1.5E-02    | 8.6E-01    | 3.0E-01    |
| 189309  | 8.5E-05 | 9.7E-05 | 5.9E-02    | 6.6E-05    | 1.3E-03    | 8.4E-02    | 1.6E-03    | 9.8E-01    | 5.2E-01    | 1.0E+00    | 8.3E-01    | 9.8E-01    | 6.1E-01    |
| 261114  | 8.8E-05 | 1.0E-04 | 6.2E-02    | 2.5E-01    | 3.8E-01    | 2.1E-05    | 6.5E-01    | 1.0E+00    | 1.6E-03    | 1.0E+00    | 2.9E-03    | 1.0E+00    | 8.6E-03    |
| 129990  | 9.7E-05 | 1.1E-04 | 6.8E-02    | 3.2E-03    | 7.8E-04    | 9.1E-01    | 2.3E-03    | 9.0E-01    | 1.2E-01    | 8.3E-01    | 3.4E-02    | 1.0E+00    | 4.5E-02    |
| 4449984 | 1.0E-04 | 1.2E-04 | 7.1E-02    | 1.4E-03    | 6.1E-02    | 1.0E+00    | 4.4E-03    | 7.9E-01    | 5.9E-03    | 9.7E-01    | 1.2E-01    | 6.1E-01    | 1.0E-02    |
| 165430  | 1.0E-04 | 1.2E-04 | 7.4E-02    | 4.9E-03    | 2.4E-03    | 9.6E-01    | 1.0E-03    | 9.7E-01    | 1.0E-01    | 6.0E-01    | 4.9E-02    | 9.0E-01    | 1.6E-02    |
| 3150250 | 1.1E-04 | 1.2E-04 | 7.7E-02    | 5.5E-02    | 9.6E-01    | 1.0E+00    | 6.1E-04    | 2.0E-01    | 6.7E-02    | 1.3E-01    | 9.3E-01    | 2.5E-03    | 9.0E-04    |
| 4449524 | 1.1E-04 | 1.3E-04 | 7.8E-02    | 1.8E-01    | 4.4E-04    | 1.0E+00    | 9.8E-01    | 6.2E-02    | 1.6E-01    | 7.1E-01    | 6.6E-04    | 1.5E-02    | 9.4E-01    |
| 265483  | 1.1E-04 | 1.3E-04 | 7.9E-02    | 7.9E-03    | 1.2E-03    | 9.8E-01    | 2.5E-03    | 8.4E-01    | 1.0E-01    | 7.0E-01    | 2.2E-02    | 9.9E-01    | 2.4E-02    |
| 333576  | 1.2E-04 | 1.3E-04 | 8.3E-02    | 2.9E-01    | 4.3E-05    | 6.9E-02    | 2.4E-01    | 3.4E-03    | 7.4E-01    | 9.7E-01    | 3.4E-01    | 1.6E-01    | 9.9E-01    |
| 329271  | 1.3E-04 | 1.4E-04 | 8.8E-02    | 4.5E-02    | 2.2E-02    | 3.1E-05    | 4.1E-02    | 9.8E-01    | 1.9E-02    | 9.4E-01    | 1.0E-01    | 1.0E+00    | 3.0E-01    |

Table S4

| ID      | Pr      | FDR     | Bonferroni | Tukey P.A. | Tukey R.A. | Tukey T.A. | Tukey W.A. | Tukey R.P. | Tukey T.P. | Tukey W.P. | Tukey T.R. | Tukey W.R. | Tukey W.T. |
|---------|---------|---------|------------|------------|------------|------------|------------|------------|------------|------------|------------|------------|------------|
| 3919797 | 1.3E-04 | 1.4E-04 | 8.9E-02    | 1.3E-04    | 3.8E-04    | 4.8E-03    | 1.1E-01    | 1.0E+00    | 1.0E+00    | 6.6E-01    | 1.0E+00    | 6.6E-01    | 8.6E-01    |
| 174418  | 1.3E-04 | 1.5E-04 | 9.4E-02    | 1.0E-03    | 7.2E-03    | 9.0E-05    | 1.0E-01    | 1.0E+00    | 4.5E-01    | 9.3E-01    | 3.7E-01    | 9.9E-01    | 2.6E-01    |
| 259006  | 1.4E-04 | 1.6E-04 | 9.8E-02    | 7.1E-01    | 9.4E-01    | 6.4E-04    | 1.3E-02    | 9.9E-01    | 5.1E-03    | 8.8E-02    | 3.6E-03    | 5.7E-02    | 9.4E-01    |
| 40230   | 1.4E-04 | 1.6E-04 | 1.0E-01    | 4.4E-01    | 1.0E+00    | 3.1E-01    | 1.5E-04    | 6.1E-01    | 9.7E-01    | 3.6E-03    | 4.3E-01    | 2.3E-04    | 6.8E-02    |
| 262917  | 1.5E-04 | 1.7E-04 | 1.1E-01    | 1.4E-01    | 1.8E-03    | 3.1E-03    | 1.0E+00    | 2.3E-01    | 2.2E-01    | 3.1E-01    | 1.0E+00    | 9.9E-03    | 1.2E-02    |
| 1087825 | 1.7E-04 | 1.9E-04 | 1.2E-01    | 1.6E-03    | 9.0E-01    | 4.5E-02    | 3.9E-03    | 1.7E-02    | 9.9E-01    | 9.6E-01    | 2.1E-01    | 2.5E-02    | 8.9E-01    |
| 162539  | 1.8E-04 | 2.0E-04 | 1.2E-01    | 7.5E-03    | 1.0E+00    | 1.0E+00    | 2.3E-02    | 1.0E-02    | 1.3E-02    | 9.9E-01    | 9.9E-01    | 3.2E-02    | 2.7E-02    |
| 309663  | 1.9E-04 | 2.1E-04 | 1.3E-01    | 4.3E-03    | 1.7E-04    | 8.5E-02    | 1.8E-03    | 5.6E-01    | 9.9E-01    | 7.4E-01    | 5.0E-01    | 1.0E+00    | 6.4E-01    |
| 306469  | 1.9E-04 | 2.2E-04 | 1.4E-01    | 2.4E-02    | 3.2E-04    | 2.2E-03    | 7.3E-01    | 3.2E-01    | 5.2E-01    | 7.0E-01    | 1.0E+00    | 7.3E-02    | 1.4E-01    |
| 264468  | 2.2E-04 | 2.4E-04 | 1.5E-01    | 4.0E-04    | 3.4E-01    | 9.9E-01    | 5.6E-02    | 9.8E-02    | 7.5E-03    | 9.4E-01    | 7.1E-01    | 7.4E-01    | 1.9E-01    |
| 136604  | 2.3E-04 | 2.6E-04 | 1.6E-01    | 8.9E-04    | 3.5E-02    | 4.8E-04    | 6.0E-01    | 8.4E-01    | 8.0E-01    | 2.8E-01    | 3.6E-01    | 8.1E-01    | 8.6E-02    |
| 273091  | 2.5E-04 | 2.8E-04 | 1.8E-01    | 2.7E-02    | 8.9E-05    | 6.1E-01    | 5.0E-01    | 1.3E-01    | 7.7E-01    | 9.1E-01    | 3.3E-02    | 8.0E-02    | 1.0E+00    |
| 213896  | 2.8E-04 | 3.1E-04 | 2.0E-01    | 1.1E-03    | 3.9E-03    | 1.9E-03    | 2.1E-03    | 1.0E+00    | 9.6E-01    | 9.3E-01    | 9.6E-01    | 9.3E-01    | 1.0E+00    |
| 4480176 | 3.1E-04 | 3.4E-04 | 2.1E-01    | 4.6E-03    | 2.3E-04    | 4.6E-03    | 3.0E-01    | 6.1E-01    | 9.3E-01    | 8.6E-01    | 9.9E-01    | 2.7E-01    | 5.8E-01    |
| 105109  | 3.2E-04 | 3.5E-04 | 2.2E-01    | 3.6E-03    | 2.5E-04    | 8.5E-03    | 4.3E-01    | 6.9E-01    | 9.9E-01    | 6.7E-01    | 9.8E-01    | 1.8E-01    | 5.5E-01    |
| 4454025 | 3.6E-04 | 3.9E-04 | 2.5E-01    | 3.0E-04    | 8.2E-01    | 4.1E-01    | 5.3E-01    | 6.9E-03    | 2.3E-01    | 2.1E-01    | 9.2E-01    | 9.6E-01    | 1.0E+00    |
| 191216  | 3.7E-04 | 4.1E-04 | 2.6E-01    | 6.3E-04    | 3.3E-04    | 1.0E-01    | 8.8E-02    | 9.7E-01    | 8.1E-01    | 9.2E-01    | 5.6E-01    | 7.1E-01    | 1.0E+00    |
| 343130  | 4.0E-04 | 4.4E-04 | 2.8E-01    | 2.5E-01    | 3.4E-04    | 1.1E-02    | 7.7E-02    | 3.2E-02    | 3.2E-01    | 7.8E-01    | 9.8E-01    | 7.5E-01    | 9.8E-01    |
| 4393892 | 4.7E-04 | 5.1E-04 | 3.3E-01    | 1.0E-02    | 1.6E-04    | 1.2E-01    | 1.8E-02    | 3.7E-01    | 1.0E+00    | 9.7E-01    | 3.8E-01    | 9.2E-01    | 9.2E-01    |
| 2797565 | 4.7E-04 | 5.2E-04 | 3.3E-01    | 7.5E-03    | 2.9E-04    | 5.9E-02    | 7.3E-01    | 5.6E-01    | 1.0E+00    | 4.8E-01    | 6.9E-01    | 6.8E-02    | 6.8E-01    |
| 267388  | 4.8E-04 | 5.2E-04 | 3.4E-01    | 1.0E-02    | 1.2E-03    | 1.4E-03    | 4.5E-01    | 7.8E-01    | 6.0E-01    | 8.3E-01    | 9.9E-01    | 3.5E-01    | 2.5E-01    |
| 261892  | 4.8E-04 | 5.3E-04 | 3.4E-01    | 1.7E-02    | 5.2E-03    | 8.9E-01    | 1.8E-03    | 9.3E-01    | 3.3E-01    | 4.8E-01    | 1.3E-01    | 8.8E-01    | 3.9E-02    |
| 308332  | 4.9E-04 | 5.3E-04 | 3.4E-01    | 5.4E-04    | 2.1E-01    | 5.0E-01    | 1.0E+00    | 2.3E-01    | 2.2E-01    | 1.2E-02    | 1.0E+00    | 5.4E-01    | 7.9E-01    |
| 4462541 | 5.8E-04 | 6.3E-04 | 4.1E-01    | 1.8E-01    | 9.2E-01    | 6.8E-03    | 8.2E-01    | 6.2E-01    | 3.1E-01    | 2.5E-02    | 3.8E-02    | 3.7E-01    | 9.4E-04    |
| 166718  | 5.9E-04 | 6.4E-04 | 4.1E-01    | 1.9E-01    | 1.5E-03    | 1.0E+00    | 1.3E-01    | 1.5E-01    | 2.5E-01    | 9.3E-01    | 1.3E-03    | 8.3E-01    | 1.5E-01    |
| 4045882 | 7.5E-04 | 8.2E-04 | 5.3E-01    | 4.0E-03    | 1.0E+00    | 6.4E-01    | 1.7E-01    | 2.5E-03    | 3.7E-01    | 9.6E-01    | 6.4E-01    | 1.6E-01    | 9.0E-01    |
| 2875735 | 7.9E-04 | 8.6E-04 | 5.6E-01    | 1.6E-03    | 1.6E-01    | 8.9E-01    | 8.3E-03    | 5.0E-01    | 8.2E-02    | 9.9E-01    | 7.8E-01    | 5.1E-01    | 1.2E-01    |
| 263366  | 8.2E-04 | 8.8E-04 | 5.7E-01    | 8.7E-03    | 1.0E-02    | 4.9E-04    | 8.9E-02    | 1.0E+00    | 4.1E-01    | 1.0E+00    | 6.1E-01    | 1.0E+00    | 5.5E-01    |
| 172464  | 8.6E-04 | 9.3E-04 | 6.1E-01    | 8.8E-03    | 9.4E-01    | 9.6E-01    | 3.9E-01    | 5.6E-02    | 2.7E-03    | 8.6E-01    | 6.3E-01    | 7.6E-01    | 1.7E-01    |
| 1571092 | 9.1E-04 | 9.8E-04 | 6.4E-01    | 3.1E-01    | 4.8E-01    | 2.6E-04    | 8.2E-01    | 1.0E+00    | 1.2E-02    | 9.9E-01    | 1.7E-02    | 1.0E+00    | 2.4E-02    |
| 4435934 | 9.4E-04 | 1.0E-03 | 6.6E-01    | 5.0E-02    | 1.9E-02    | 6.4E-03    | 1.4E-03    | 9.6E-01    | 6.0E-01    | 2.4E-01    | 9.3E-01    | 6.2E-01    | 9.7E-01    |
| 833390  | 9.4E-04 | 1.0E-03 | 6.6E-01    | 1.4E-01    | 6.0E-02    | 7.0E-04    | 9.8E-01    | 9.6E-01    | 7.7E-02    | 6.2E-01    | 3.2E-01    | 3.7E-01    | 1.3E-02    |
| 4413888 | 1.0E-03 | 1.1E-03 | 7.0E-01    | 6.1E-01    | 6.2E-04    | 9.1E-01    | 6.5E-01    | 9.1E-03    | 1.0E+00    | 1.0E+00    | 2.8E-02    | 1.4E-01    | 9.9E-01    |
| 197452  | 1.1E-03 | 1.1E-03 | 7.5E-01    | 5.2E-01    | 7.9E-04    | 6.7E-02    | 1.5E-01    | 1.7E-02    | 5.1E-01    | 7.3E-01    | 8.1E-01    | 7.0E-01    | 1.0E+00    |
| 3449666 | 1.1E-03 | 1.2E-03 | 7.7E-01    | 5.3E-02    | 1.0E+00    | 8.8E-01    | 7.8E-03    | 3.7E-02    | 5.8E-01    | 5.8E-01    | 8.7E-01    | 5.7E-03    | 1.2E-01    |
| 4418586 | 1.1E-03 | 1.2E-03 | 7.7E-01    | 1.3E-01    | 5.2E-01    | 3.1E-04    | 2.9E-01    | 9.5E-01    | 4.5E-02    | 1.0E+00    | 1.6E-02    | 9.6E-01    | 1.9E-01    |
| 271734  | 1.1E-03 | 1.2E-03 | 7.9E-01    | 5.2E-01    | 7.5E-03    | 9.8E-01    | 7.9E-03    | 1.3E-01    | 9.3E-01    | 1.0E-01    | 7.5E-02    | 9.8E-01    | 5.4E-02    |
| 4480557 | 1.2E-03 | 1.2E-03 | 8.2E-01    | 4.9E-02    | 2.8E-03    | 1.8E-03    | 7.2E-02    | 6.0E-01    | 3.3E-01    | 9.9E-01    | 9.7E-01    | 9.7E-01    | 8.1E-01    |
| 184451  | 1.2E-03 | 1.3E-03 | 8.5E-01    | 9.0E-04    | 4.2E-02    | 1.3E-01    | 9.4E-01    | 8.0E-01    | 8.1E-01    | 6.1E-02    | 1.0E+00    | 4.3E-01    | 6.0E-01    |
| 4464787 | 1.3E-03 | 1.3E-03 | 8.9E-01    | 1.9E-02    | 1.4E-01    | 7.8E-04    | 8.1E-01    | 9.6E-01    | 3.6E-01    | 5.4E-01    | 1.8E-01    | 8.8E-01    | 5.3E-02    |
| 228310  | 1.3E-03 | 1.4E-03 | 9.4E-01    | 1.2E-01    | 9.9E-01    | 9.7E-01    | 7.5E-02    | 2.6E-02    | 4.5E-02    | 9.1E-01    | 1.0E+00    | 2.2E-02    | 2.9E-02    |
| 194665  | 1.4E-03 | 1.4E-03 | 9.6E-01    | 6.9E-03    | 2.2E-03    | 2.8E-01    | 9.2E-01    | 9.4E-01    | 8.7E-01    | 2.2E-01    | 5.6E-01    | 8.7E-02    | 8.4E-01    |
| 586453  | 1.4E-03 | 1.5E-03 | 9.8E-01    | 1.2E-01    | 2.5E-01    | 4.2E-02    | 5.7E-04    | 1.0E+00    | 8.4E-01    | 6.7E-02    | 8.1E-01    | 7.2E-02    | 5.9E-01    |
| 210262  | 1.8E-03 | 1.9E-03 | 1.0E+00    | 1.5E-02    | 1.5E-03    | 8.8E-03    | 2.6E-01    | 7.6E-01    | 9.0E-01    | 9.8E-01    | 1.0E+00    | 6.2E-01    | 7.5E-01    |
| 578016  | 1.9E-03 | 2.0E-03 | 1.0E+00    | 4.1E-01    | 7.6E-04    | 3.6E-01    | 1.6E-01    | 2.8E-02    | 9.9E-01    | 8.3E-01    | 2.9E-01    | 6.7E-01    | 9.9E-01    |
| 187272  | 2.3E-03 | 2.4E-03 | 1.0E+00    | 4.6E-03    | 8.2E-02    | 1.0E+00    | 3.5E-01    | 9.0E-01    | 2.3E-02    | 8.1E-01    | 1.9E-01    | 1.0E+00    | 5.1E-01    |
| 1113553 | 2.3E-03 | 2.4E-03 | 1.0E+00    | 2.9E-02    | 5.7E-03    | 3.7E-02    | 9.8E-01    | 8.7E-01    | 9.8E-01    | 2.8E-01    | 1.0E+00    | 8.4E-02    | 2.2E-01    |
| 188785  | 2.3E-03 | 2.5E-03 | 1.0E+00    | 6.3E-03    | 9.4E-01    | 1.0E+00    | 8.5E-01    | 4.3E-02    | 1.8E-02    | 3.1E-01    | 9.5E-01    | 1.0E+00    | 8.7E-01    |
| 178480  | 2.4E-03 | 2.5E-03 | 1.0E+00    | 7.6E-02    | 3.9E-03    | 4.8E-01    | 6.0E-03    | 5.6E-01    | 9.8E-01    | 4.4E-01    | 4.3E-01    | 9.9E-01    | 3.3E-01    |
| 342685  | 2.4E-03 | 2.5E-03 | 1.0E+00    | 4.9E-02    | 2.0E-02    | 1.0E+00    | 8.1E-02    | 9.6E-01    | 7.5E-02    | 9.9E-01    | 3.3E-02    | 1.0E+00    | 9.9E-02    |
| 1112373 | 2.8E-03 | 2.9E-03 | 1.0E+00    | 5.1E-02    | 1.6E-03    | 2.8E-02    | 5.5E-01    | 4.6E-01    | 9.1E-01    | 9.5E-01    | 9.9E-01    | 3.0E-01    | 6.8E-01    |
| 4379449 | 3.9E-03 | 4.1E-03 | 1.0E+00    | 1.0E-02    | 1.6E-01    | 6.2E-01    | 1.0E+00    | 8.7E-01    | 5.7E-01    | 2.1E-02    | 9.7E-01    | 1.9E-01    | 5.9E-01    |

Table S4

| ID      | Pr      | FDR     | Bonferroni | Tukey P.A. | Tukey R.A. | Tukey T.A. | Tukey W.A. | Tukey R.P. | Tukey T.P. | Tukey W.P. | Tukey T.R. | Tukey W.R. | Tukey W.T. |
|---------|---------|---------|------------|------------|------------|------------|------------|------------|------------|------------|------------|------------|------------|
| 174824  | 4.3E-03 | 4.5E-03 | 1.0E+00    | 5.2E-01    | 4.3E-03    | 1.0E-01    | 9.7E-01    | 8.4E-02    | 6.4E-01    | 9.6E-01    | 9.4E-01    | 8.3E-02    | 4.5E-01    |
| 228798  | 4.4E-03 | 4.6E-03 | 1.0E+00    | 7.9E-03    | 1.2E-01    | 9.0E-01    | 2.2E-02    | 9.1E-01    | 2.1E-01    | 9.9E-01    | 6.8E-01    | 8.0E-01    | 2.2E-01    |
| 3319464 | 4.5E-03 | 4.6E-03 | 1.0E+00    | 5.1E-01    | 5.3E-03    | 3.4E-02    | 7.5E-01    | 1.0E-01    | 3.4E-01    | 1.0E+00    | 1.0E+00    | 3.1E-01    | 5.4E-01    |
| 4468234 | 4.7E-03 | 4.8E-03 | 1.0E+00    | 1.5E-02    | 1.2E-02    | 9.4E-01    | 1.2E-01    | 9.9E-01    | 2.4E-01    | 1.0E+00    | 1.7E-01    | 9.9E-01    | 5.1E-01    |
| 191878  | 4.9E-03 | 5.1E-03 | 1.0E+00    | 5.0E-03    | 6.7E-01    | 8.4E-01    | 8.0E-02    | 1.6E-01    | 2.2E-01    | 1.0E+00    | 1.0E+00    | 5.4E-01    | 5.5E-01    |
| 100344  | 5.9E-03 | 6.1E-03 | 1.0E+00    | 1.0E+00    | 3.8E-02    | 8.7E-02    | 9.9E-01    | 3.2E-02    | 9.4E-02    | 1.0E+00    | 1.0E+00    | 2.5E-01    | 3.5E-01    |
| 896545  | 7.7E-03 | 7.9E-03 | 1.0E+00    | 7.5E-03    | 1.1E-02    | 2.2E-01    | 7.9E-02    | 1.0E+00    | 9.3E-01    | 1.0E+00    | 9.0E-01    | 1.0E+00    | 9.8E-01    |
| 839200  | 8.5E-03 | 8.7E-03 | 1.0E+00    | 1.4E-02    | 9.7E-01    | 6.3E-01    | 1.4E-01    | 5.6E-02    | 6.2E-01    | 1.0E+00    | 9.0E-01    | 3.3E-01    | 8.8E-01    |
| 190063  | 9.6E-03 | 9.9E-03 | 1.0E+00    | 4.5E-02    | 3.8E-02    | 4.7E-01    | 1.0E+00    | 1.0E+00    | 9.5E-01    | 1.2E-01    | 8.7E-01    | 9.3E-02    | 5.7E-01    |
| 168984  | 1.1E-02 | 1.1E-02 | 1.0E+00    | 3.1E-01    | 3.6E-02    | 1.0E+00    | 9.0E-02    | 6.6E-01    | 4.4E-01    | 7.7E-01    | 7.2E-02    | 1.0E+00    | 1.4E-01    |
| 97263   | 1.1E-02 | 1.2E-02 | 1.0E+00    | 2.5E-02    | 2.4E-01    | 2.2E-01    | 9.9E-03    | 9.1E-01    | 9.9E-01    | 7.9E-01    | 1.0E+00    | 4.4E-01    | 7.0E-01    |
| 4390365 | 1.2E-02 | 1.3E-02 | 1.0E+00    | 8.6E-02    | 6.5E-02    | 1.4E-01    | 1.0E+00    | 9.9E-01    | 1.0E+00    | 1.6E-01    | 1.0E+00    | 1.2E-01    | 1.9E-01    |
| 201374  | 1.3E-02 | 1.3E-02 | 1.0E+00    | 1.9E-01    | 5.2E-02    | 1.4E-02    | 9.2E-01    | 9.0E-01    | 4.6E-01    | 8.5E-01    | 9.1E-01    | 5.0E-01    | 2.0E-01    |
| 4364243 | 1.5E-02 | 1.5E-02 | 1.0E+00    | 1.1E-01    | 6.7E-03    | 2.8E-01    | 1.1E-01    | 5.9E-01    | 1.0E+00    | 9.7E-01    | 7.6E-01    | 9.8E-01    | 9.8E-01    |
| 3998912 | 1.8E-02 | 1.8E-02 | 1.0E+00    | 6.1E-01    | 4.1E-02    | 1.4E-01    | 1.0E+00    | 3.6E-01    | 6.6E-01    | 7.4E-01    | 1.0E+00    | 9.7E-02    | 2.2E-01    |
| 310781  | 2.5E-02 | 2.5E-02 | 1.0E+00    | 1.0E-01    | 3.7E-01    | 1.0E+00    | 1.0E-01    | 9.8E-01    | 1.7E-01    | 9.7E-01    | 4.7E-01    | 8.5E-01    | 1.4E-01    |
| 255098  | 2.5E-02 | 2.6E-02 | 1.0E+00    | 6.6E-01    | 8.7E-02    | 3.5E-02    | 9.5E-01    | 5.3E-01    | 2.4E-01    | 1.0E+00    | 9.5E-01    | 5.5E-01    | 2.8E-01    |
| 259249  | 2.6E-02 | 2.6E-02 | 1.0E+00    | 8.4E-01    | 2.8E-01    | 1.7E-02    | 8.4E-01    | 7.5E-01    | 7.1E-02    | 1.0E+00    | 5.5E-01    | 9.6E-01    | 3.1E-01    |
| 171532  | 3.5E-02 | 3.5E-02 | 1.0E+00    | 7.2E-02    | 6.1E-02    | 7.1E-02    | 7.9E-01    | 1.0E+00    | 9.8E-01    | 8.4E-01    | 1.0E+00    | 7.4E-01    | 6.6E-01    |
| 317854  | 2.0E-01 | 2.0E-01 | 1.0E+00    | 9.7E-01    | 8.6E-01    | 1.0E+00    | 6.3E-01    | 3.8E-01    | 1.0E+00    | 8.6E-01    | 7.1E-01    | 1.6E-01    | 8.6E-01    |
| 4441792 | 2.3E-01 | 2.3E-01 | 1.0E+00    | 1.0E+00    | 8.2E-01    | 4.7E-01    | 9.6E-01    | 9.2E-01    | 5.7E-01    | 8.2E-01    | 9.5E-01    | 4.8E-01    | 2.3E-01    |
| 268384  | 3.5E-01 | 3.6E-01 | 1.0E+00    | 1.0E+00    | 8.1E-01    | 1.0E+00    | 8.7E-01    | 4.8E-01    | 1.0E+00    | 9.5E-01    | 7.5E-01    | 3.1E-01    | 9.5E-01    |
| 4378477 | 5.3E-01 | 5.3E-01 | 1.0E+00    | 8.1E-01    | 1.0E+00    | 5.6E-01    | 9.9E-01    | 8.8E-01    | 9.6E-01    | 9.9E-01    | 6.3E-01    | 1.0E+00    | 8.7E-01    |
| 22659   | 5.6E-01 | 5.6E-01 | 1.0E+00    | 1.0E+00    | 6.8E-01    | 9.0E-01    | 9.3E-01    | 6.2E-01    | 8.9E-01    | 9.3E-01    | 1.0E+00    | 1.0E+00    | 1.0E+00    |
| 3505032 | 5.9E-01 | 5.9E-01 | 1.0E+00    | 9.2E-01    | 9.9E-01    | 5.3E-01    | 1.0E+00    | 1.0E+00    | 8.6E-01    | 9.8E-01    | 7.6E-01    | 1.0E+00    | 6.9E-01    |
| 144207  | 6.1E-01 | 6.2E-01 | 1.0E+00    | 9.8E-01    | 9.8E-01    | 5.6E-01    | 8.6E-01    | 1.0E+00    | 7.6E-01    | 9.7E-01    | 8.4E-01    | 9.8E-01    | 9.9E-01    |
| 63144   | 6.2E-01 | 6.3E-01 | 1.0E+00    | 1.0E+00    | 1.0E+00    | 9.6E-01    | 8.4E-01    | 1.0E+00    | 8.3E-01    | 9.1E-01    | 8.8E-01    | 9.1E-01    | 5.1E-01    |
| 2937207 | 6.5E-01 | 6.5E-01 | 1.0E+00    | 9.5E-01    | 1.0E+00    | 1.0E+00    | 8.8E-01    | 7.8E-01    | 9.3E-01    | 9.9E-01    | 1.0E+00    | 7.2E-01    | 8.6E-01    |
| 3974550 | 6.8E-01 | 6.8E-01 | 1.0E+00    | 1.0E+00    | 1.0E+00    | 8.2E-01    | 9.8E-01    | 1.0E+00    | 8.3E-01    | 9.5E-01    | 8.0E-01    | 9.8E-01    | 5.9E-01    |
