# Supplementary material for: Interplay of host microbiota, genetic perturbations, and inflammation promotes local development of intestinal neoplasms in mice
Source: PubMed Central journal article supplement — J Exp Med. 2014 Mar 10;211(3):457–72. doi: 10.1084/jem.20131587 (PMC3949565; doi:10.1084/jem.20131587), 2014-03-10
Supplement: supp_jem.20131587_JEM_20131587_TableS5.pdf [file supp_jem.20131587_JEM_20131587_TableS5.pdf]

**Table S5.** Differentially regulated genes by BeadArray in CD45<sup>+</sup> cells isolated from *HBUS* polyps compared with unaffected proximal cecum, as show in the heat map

| ID     | Symbol        | logFC | AveExpr | t      | P-value | Adjusted p-value | B      |
|--------|---------------|-------|---------|--------|---------|------------------|--------|
| 20201  | S100a8        | 2.371 | 10.674  | 7.816  | 0.001   | 0.029            | 0.572  |
| 20202  | S100a9        | 2.333 | 9.586   | 8.339  | 0.000   | 0.026            | 0.889  |
| 107753 | Lgals2        | 2.097 | 8.946   | 7.643  | 0.001   | 0.029            | 0.461  |
| 18489  | Reg3b         | 1.990 | 8.742   | 5.882  | 0.002   | 0.047            | -0.829 |
| 107587 | Osr2          | 1.834 | 8.228   | 10.678 | 0.000   | 0.022            | 2.072  |
| 11846  | Arg1          | 1.827 | 8.236   | 7.423  | 0.001   | 0.030            | 0.317  |
| 20730  | Spink3        | 1.553 | 8.582   | 7.153  | 0.001   | 0.033            | 0.134  |
| 17898  | Myl7          | 1.545 | 7.983   | 12.458 | 0.000   | 0.022            | 2.769  |
| 20750  | Spp1          | 1.377 | 7.878   | 9.729  | 0.000   | 0.024            | 1.634  |
| 99709  | AI747448      | 1.248 | 9.348   | 6.781  | 0.001   | 0.037            | -0.130 |
| 76905  | Lrg1          | 1.151 | 9.224   | 9.578  | 0.000   | 0.024            | 1.559  |
| 19695  | Reg3g         | 1.129 | 7.717   | 6.258  | 0.001   | 0.042            | -0.525 |
| 11745  | Anxa3         | 1.120 | 10.805  | 10.579 | 0.000   | 0.022            | 2.028  |
| 231293 | Cwh43         | 1.005 | 8.995   | 6.780  | 0.001   | 0.037            | -0.131 |
| 209195 | Clic6         | 1.002 | 7.846   | 7.051  | 0.001   | 0.033            | 0.063  |
| 12827  | Col4a2        | 1.002 | 9.165   | 7.533  | 0.001   | 0.030            | 0.390  |
| 353320 | Defb37        | 0.995 | 7.876   | 17.268 | 0.000   | 0.018            | 4.085  |
| 75604  | Tm4sf5        | 0.979 | 7.928   | 18.499 | 0.000   | 0.018            | 4.328  |
| 76574  | Mfsd2a        | 0.972 | 8.774   | 7.209  | 0.001   | 0.032            | 0.172  |
| 12579  | Cdkn2b        | 0.931 | 8.834   | 6.179  | 0.002   | 0.043            | -0.588 |
| 14916  | Guca2b        | 0.900 | 8.765   | 7.407  | 0.001   | 0.031            | 0.306  |
| 112407 | Egln3         | 0.885 | 9.629   | 5.701  | 0.002   | 0.049            | -0.981 |
| 93835  | Amn           | 0.849 | 8.421   | 6.291  | 0.001   | 0.042            | -0.500 |
| 17474  | Clec4d        | 0.837 | 8.220   | 7.247  | 0.001   | 0.032            | 0.199  |
| 20300  | Ccl25         | 0.798 | 7.881   | 6.929  | 0.001   | 0.035            | -0.023 |
| 106407 | Slc51a        | 0.773 | 10.550  | 7.270  | 0.001   | 0.032            | 0.214  |
| 17965  | Nbl1          | 0.762 | 8.380   | 7.061  | 0.001   | 0.033            | 0.070  |
| 15439  | Hp            | 0.740 | 7.950   | 8.562  | 0.000   | 0.025            | 1.018  |
| 66166  | S100a14       | 0.739 | 8.771   | 9.448  | 0.000   | 0.024            | 1.494  |
| 78354  | 2210407C18Rik | 0.712 | 7.727   | 7.591  | 0.001   | 0.030            | 0.427  |
| 110310 | Krt7          | 0.701 | 9.041   | 6.754  | 0.001   | 0.037            | -0.149 |
| 69524  | Esam          | 0.688 | 9.566   | 7.265  | 0.001   | 0.032            | 0.211  |
| 74144  | Robo4         | 0.682 | 8.440   | 8.513  | 0.000   | 0.025            | 0.990  |
| 20443  | St3gal4       | 0.673 | 7.964   | 5.910  | 0.002   | 0.047            | -0.806 |
| 22264  | Prap1         | 0.672 | 8.077   | 6.797  | 0.001   | 0.037            | -0.118 |
| 20194  | S100a10       | 0.668 | 9.647   | 8.461  | 0.000   | 0.025            | 0.960  |
| 14869  | Gstp2         | 0.660 | 9.694   | 7.262  | 0.001   | 0.032            | 0.209  |
| 18132  | Notch4        | 0.655 | 8.352   | 12.247 | 0.000   | 0.022            | 2.693  |
| 20186  | Nr1h4         | 0.649 | 9.720   | 10.124 | 0.000   | 0.024            | 1.822  |
| 58804  | Cdc42ep5      | 0.642 | 9.129   | 8.530  | 0.000   | 0.025            | 1.000  |
| 14860  | Gsta4         | 0.642 | 8.797   | 6.483  | 0.001   | 0.039            | -0.351 |
| 218138 | Gmcs          | 0.642 | 11.930  | 8.814  | 0.000   | 0.025            | 1.159  |

Table S5

| ID        | Symbol        | logFC  | AveExpr | t       | P-value | Adjusted p-value | B      |
|-----------|---------------|--------|---------|---------|---------|------------------|--------|
| 110075    | Bmp3          | 0.641  | 7.574   | 16.319  | 0.000   | 0.019            | 3.875  |
| 22371     | Vwf           | 0.635  | 9.513   | 11.981  | 0.000   | 0.022            | 2.596  |
| 16181     | Il1rn         | 0.634  | 8.668   | 6.588   | 0.001   | 0.038            | -0.272 |
| 16664     | Krt14         | 0.627  | 7.554   | 6.047   | 0.002   | 0.045            | -0.694 |
| 16669     | Krt19         | 0.626  | 11.787  | 9.255   | 0.000   | 0.024            | 1.395  |
| 105732    | Fam83h        | 0.626  | 8.464   | 5.725   | 0.002   | 0.049            | -0.961 |
| 11752     | Anxa8         | 0.624  | 7.719   | 11.455  | 0.000   | 0.022            | 2.394  |
| 223227    | Sox21         | 0.619  | 7.743   | 5.776   | 0.002   | 0.048            | -0.918 |
| 74747     | Ddit4         | 0.612  | 10.122  | 8.442   | 0.000   | 0.025            | 0.949  |
| 16009     | Igfbp3        | 0.608  | 8.004   | 7.694   | 0.001   | 0.029            | 0.494  |
| 12709     | Ckb           | 0.603  | 11.449  | 12.040  | 0.000   | 0.022            | 2.618  |
| 192897    | Itgb4         | 0.598  | 10.430  | 10.651  | 0.000   | 0.022            | 2.060  |
| 14776     | Gpx2          | 0.596  | 12.311  | 10.721  | 0.000   | 0.022            | 2.090  |
| 67860     | S100a16       | 0.594  | 8.265   | 6.143   | 0.002   | 0.044            | -0.616 |
| 67800     | Dgat2         | 0.592  | 9.926   | 6.551   | 0.001   | 0.039            | -0.300 |
| 76282     | Gpt           | -0.587 | 9.014   | -14.745 | 0.000   | 0.022            | 3.479  |
| 14991     | H2-M3         | -0.588 | 8.678   | -11.052 | 0.000   | 0.022            | 2.230  |
| 13849     | Ephx1         | -0.588 | 8.229   | -12.320 | 0.000   | 0.022            | 2.720  |
| 12493     | Cd37          | -0.595 | 7.546   | -8.662  | 0.000   | 0.025            | 1.075  |
| 14605     | Tsc22d3       | -0.596 | 8.957   | -10.068 | 0.000   | 0.024            | 1.796  |
| 71704     | Arhgef3       | -0.598 | 10.306  | -7.748  | 0.001   | 0.029            | 0.529  |
| 12010     | B2m           | -0.599 | 13.171  | -9.867  | 0.000   | 0.024            | 1.700  |
| 14127     | Fcer1g        | -0.601 | 11.400  | -6.669  | 0.001   | 0.037            | -0.212 |
| 16421     | Itgb7         | -0.604 | 8.234   | -6.430  | 0.001   | 0.040            | -0.392 |
| 66940     | Shisa5        | -0.604 | 9.541   | -8.165  | 0.000   | 0.027            | 0.786  |
| 22324     | Vav1          | -0.608 | 8.963   | -12.160 | 0.000   | 0.022            | 2.662  |
| 17084     | Ly86          | -0.610 | 9.707   | -6.051  | 0.002   | 0.045            | -0.691 |
| 16825     | Ldb1          | -0.610 | 10.703  | -8.189  | 0.000   | 0.027            | 0.800  |
| 104175    | Sbk1          | -0.615 | 8.399   | -5.717  | 0.002   | 0.049            | -0.968 |
| 12988     | Csk           | -0.634 | 9.437   | -15.692 | 0.000   | 0.020            | 3.725  |
| 54354     | Rassf5        | -0.646 | 8.891   | -6.413  | 0.001   | 0.040            | -0.405 |
| 100041504 | LOC100041504  | -0.647 | 8.294   | -7.745  | 0.001   | 0.029            | 0.527  |
| 74015     | Fcho1         | -0.667 | 8.513   | -7.847  | 0.001   | 0.029            | 0.591  |
| 13421     | Dnase1l3      | -0.672 | 8.283   | -7.632  | 0.001   | 0.029            | 0.454  |
| 12268     | C4b           | -0.675 | 8.431   | -5.743  | 0.002   | 0.049            | -0.946 |
| 239743    | Klhl6         | -0.680 | 8.456   | -10.615 | 0.000   | 0.022            | 2.044  |
| 235442    | Rab8b         | -0.682 | 9.925   | -7.275  | 0.001   | 0.032            | 0.218  |
| 27219     | Sgk2          | -0.693 | 8.047   | -9.101  | 0.000   | 0.024            | 1.314  |
| 171207    | Arhgap4       | -0.695 | 8.447   | -7.502  | 0.001   | 0.030            | 0.369  |
| 16797     | Lat           | -0.702 | 7.923   | -8.004  | 0.000   | 0.028            | 0.688  |
| 103551    | E130012A19Rik | -0.704 | 9.336   | -8.944  | 0.000   | 0.025            | 1.230  |
| 16994     | Ltb           | -0.710 | 7.947   | -17.867 | 0.000   | 0.018            | 4.207  |
| 16792     | Laptn5        | -0.717 | 12.887  | -5.940  | 0.002   | 0.047            | -0.781 |
| 21940     | Cd27          | -0.718 | 7.746   | -5.695  | 0.002   | 0.049            | -0.987 |
| 23880     | Fyb           | -0.737 | 8.543   | -8.132  | 0.000   | 0.027            | 0.766  |

Table S5

| ID     | Symbol  | logFC  | AveExpr | t       | P-value | Adjusted p-value | B      |
|--------|---------|--------|---------|---------|---------|------------------|--------|
| 18227  | Nr4a2   | -0.746 | 7.864   | -5.871  | 0.002   | 0.047            | -0.838 |
| 16407  | Itgae   | -0.749 | 8.338   | -8.096  | 0.000   | 0.028            | 0.744  |
| 54563  | Nup210  | -0.750 | 10.412  | -6.191  | 0.002   | 0.043            | -0.578 |
| 321019 | Gpr183  | -0.752 | 8.282   | -6.072  | 0.002   | 0.045            | -0.673 |
| 11749  | Anxa6   | -0.773 | 8.869   | -6.087  | 0.002   | 0.045            | -0.662 |
| 259277 | Klk8    | -0.780 | 8.044   | -8.054  | 0.000   | 0.028            | 0.719  |
| 74096  | Hvcn1   | -0.781 | 7.963   | -10.697 | 0.000   | 0.022            | 2.080  |
| 16498  | Kcnab2  | -0.783 | 8.359   | -17.093 | 0.000   | 0.018            | 4.048  |
| 12458  | Ccr6    | -0.785 | 7.966   | -8.398  | 0.000   | 0.025            | 0.923  |
| 246177 | Myo1g   | -0.787 | 8.719   | -6.476  | 0.001   | 0.039            | -0.356 |
| 246256 | Fcgr4   | -0.789 | 10.504  | -11.244 | 0.000   | 0.022            | 2.309  |
| 19354  | Rac2    | -0.797 | 8.445   | -7.124  | 0.001   | 0.033            | 0.114  |
| 320484 | Rasal3  | -0.798 | 8.392   | -12.553 | 0.000   | 0.022            | 2.802  |
| 16428  | Itk     | -0.810 | 7.860   | -7.809  | 0.001   | 0.029            | 0.567  |
| 23900  | Hcst    | -0.810 | 8.334   | -7.503  | 0.001   | 0.030            | 0.370  |
| 55932  | Gbp3    | -0.814 | 8.390   | -5.891  | 0.002   | 0.047            | -0.821 |
| 14990  | H2-M2   | -0.832 | 10.497  | -6.272  | 0.001   | 0.042            | -0.514 |
| 21355  | Tap2    | -0.832 | 9.625   | -9.036  | 0.000   | 0.025            | 1.279  |
| 19260  | Ptpn22  | -0.834 | 8.085   | -5.802  | 0.002   | 0.048            | -0.896 |
| 18829  | Ccl21a  | -0.842 | 8.685   | -6.471  | 0.001   | 0.039            | -0.361 |
| 18751  | Prkcb   | -0.842 | 8.408   | -9.033  | 0.000   | 0.025            | 1.277  |
| 22163  | Tnfrsf4 | -0.845 | 8.401   | -5.785  | 0.002   | 0.048            | -0.910 |
| 65256  | Asb2    | -0.846 | 9.343   | -8.326  | 0.000   | 0.026            | 0.882  |
| 74131  | Sash3   | -0.848 | 8.795   | -6.028  | 0.002   | 0.045            | -0.709 |
| 56504  | Srpk3   | -0.865 | 7.629   | -6.376  | 0.001   | 0.041            | -0.433 |
| 15001  | H2-Oa   | -0.868 | 7.985   | -8.684  | 0.000   | 0.025            | 1.086  |
| 20249  | Scd1    | -0.869 | 8.777   | -10.956 | 0.000   | 0.022            | 2.190  |
| 18749  | Prkacb  | -0.882 | 10.247  | -20.676 | 0.000   | 0.018            | 4.694  |
| 382045 | Gpr114  | -0.898 | 9.499   | -5.820  | 0.002   | 0.048            | -0.881 |
| 223697 | Sun2    | -0.900 | 9.014   | -9.212  | 0.000   | 0.024            | 1.372  |
| 98267  | Stk17b  | -0.905 | 9.942   | -11.098 | 0.000   | 0.022            | 2.249  |
| 21838  | Thy1    | -0.912 | 9.022   | -8.806  | 0.000   | 0.025            | 1.155  |
| 12481  | Cd2     | -0.919 | 7.885   | -9.480  | 0.000   | 0.024            | 1.510  |
| 66995  | Zcchc18 | -0.925 | 8.102   | -7.537  | 0.001   | 0.030            | 0.392  |
| 60533  | Cd274   | -0.934 | 9.167   | -5.851  | 0.002   | 0.048            | -0.855 |
| 23833  | Cd52    | -0.953 | 11.429  | -6.961  | 0.001   | 0.035            | 0.000  |
| 107321 | Lpxn    | -1.021 | 9.061   | -9.388  | 0.000   | 0.024            | 1.463  |
| 58210  | Sectm1b | -1.031 | 10.220  | -9.342  | 0.000   | 0.024            | 1.440  |
| 57276  | Vsig2   | -1.059 | 8.755   | -10.821 | 0.000   | 0.022            | 2.133  |
| 16643  | Klrd1   | -1.070 | 8.333   | -9.223  | 0.000   | 0.024            | 1.378  |
| 231931 | Gimap6  | -1.071 | 9.087   | -8.759  | 0.000   | 0.025            | 1.128  |
| 15000  | H2-DMb2 | -1.095 | 8.091   | -11.599 | 0.000   | 0.022            | 2.451  |
| 12511  | Cd6     | -1.114 | 8.379   | -7.583  | 0.001   | 0.030            | 0.422  |
| 227929 | Cytip   | -1.176 | 10.768  | -8.048  | 0.000   | 0.028            | 0.715  |
| 72082  | Cyp2c55 | -1.189 | 12.035  | -13.087 | 0.000   | 0.022            | 2.982  |

Table S5

| ID     | Symbol    | logFC  | AveExpr | t       | P-value | Adjusted p-value | B      |
|--------|-----------|--------|---------|---------|---------|------------------|--------|
| 108995 | Tbc1d10c  | -1.197 | 9.486   | -9.698  | 0.000   | 0.024            | 1.618  |
| 54215  | Cd160     | -1.217 | 7.945   | -6.637  | 0.001   | 0.038            | -0.236 |
| 231932 | Gimap7    | -1.234 | 8.250   | -9.513  | 0.000   | 0.024            | 1.526  |
| 50778  | Rgs1      | -1.263 | 9.902   | -5.781  | 0.002   | 0.048            | -0.913 |
| 20621  | Snn       | -1.269 | 8.590   | -6.949  | 0.001   | 0.035            | -0.009 |
| 20715  | Serpina3g | -1.269 | 9.555   | -9.742  | 0.000   | 0.024            | 1.640  |
| 16818  | Lck       | -1.299 | 8.706   | -11.977 | 0.000   | 0.022            | 2.594  |
| 12500  | Cd3d      | -1.312 | 9.003   | -8.260  | 0.000   | 0.026            | 0.843  |
| 110168 | Gpr18     | -1.323 | 8.271   | -8.894  | 0.000   | 0.025            | 1.203  |
| 20887  | Sult1a1   | -1.348 | 10.027  | -8.593  | 0.000   | 0.025            | 1.035  |
| 13041  | Ctsw      | -1.424 | 8.585   | -7.048  | 0.001   | 0.033            | 0.061  |
| 11833  | Aqp8      | -1.426 | 11.179  | -12.123 | 0.000   | 0.022            | 2.648  |
| 12351  | Car4      | -1.440 | 8.568   | -6.274  | 0.001   | 0.042            | -0.513 |
| 20230  | Satb1     | -1.444 | 8.858   | -16.895 | 0.000   | 0.018            | 4.005  |
| 12501  | Cd3e      | -1.474 | 8.964   | -8.875  | 0.000   | 0.025            | 1.193  |
| 12526  | Cd8b1     | -1.540 | 8.377   | -6.041  | 0.002   | 0.045            | -0.699 |
| 12502  | Cd3g      | -1.572 | 9.221   | -10.657 | 0.000   | 0.022            | 2.062  |
| 72310  | Nkg7      | -1.839 | 8.561   | -6.080  | 0.002   | 0.045            | -0.667 |
| 12515  | Cd69      | -1.856 | 9.200   | -8.414  | 0.000   | 0.025            | 0.933  |
| 69169  | Faim3     | -2.450 | 8.623   | -8.613  | 0.000   | 0.025            | 1.047  |
| 20304  | Ccl5      | -2.749 | 9.957   | -10.849 | 0.000   | 0.022            | 2.145  |
| 10134  | Rsad2     | -0.862 | 8.463   | -5.239  | 0.004   | 0.048            | -1.832 |
| 3360   | Cxcr4     | -0.866 | 8.994   | -6.710  | 0.002   | 0.029            | -0.663 |
| 4395   | Ets1      | -0.872 | 9.590   | -15.312 | 0.000   | 0.011            | 3.188  |
| 6280   | Klhl6     | -0.874 | 9.097   | -17.311 | 0.000   | 0.010            | 3.695  |
| 12978  | Zcchc18   | -0.885 | 8.102   | -22.703 | 0.000   | 0.009            | 4.700  |
| 3529   | Nxpe4     | -0.888 | 7.904   | -6.460  | 0.002   | 0.032            | -0.845 |
| 1526   | Arhgdib   | -0.893 | 10.067  | -14.699 | 0.000   | 0.011            | 3.013  |
| 11151  | Srpk3     | -0.897 | 7.629   | -9.406  | 0.000   | 0.019            | 0.962  |
| 5756   | Hvcn1     | -0.900 | 8.124   | -18.390 | 0.000   | 0.009            | 3.934  |
| 6819   | Lpxn      | -0.907 | 9.061   | -10.931 | 0.000   | 0.016            | 1.674  |
| 3361   | Cxcr5     | -0.921 | 7.628   | -11.884 | 0.000   | 0.014            | 2.063  |
| 4901   | Gbp1      | -0.948 | 8.309   | -13.893 | 0.000   | 0.012            | 2.767  |
| 6301   | Klrd1     | -0.985 | 8.333   | -9.258  | 0.000   | 0.019            | 0.886  |
| 4976   | Gimap6    | -1.005 | 9.087   | -13.849 | 0.000   | 0.012            | 2.753  |
| 2881   | Ctca3     | -1.010 | 9.039   | -10.208 | 0.000   | 0.017            | 1.352  |
| 6074   | Itgae     | -1.040 | 9.457   | -10.013 | 0.000   | 0.018            | 1.260  |
| 10354  | Sectm1b   | -1.050 | 10.220  | -15.281 | 0.000   | 0.011            | 3.179  |
| 5386   | H2-Ob     | -1.057 | 7.904   | -7.507  | 0.001   | 0.025            | -0.123 |
| 2605   | Cd79b     | -1.062 | 7.965   | -8.333  | 0.001   | 0.021            | 0.380  |
| 3435   | Cytip     | -1.068 | 10.768  | -8.092  | 0.001   | 0.022            | 0.239  |
| 2532   | Cd160     | -1.071 | 7.945   | -5.708  | 0.003   | 0.041            | -1.433 |
| 2559   | Cd27      | -1.073 | 8.203   | -7.936  | 0.001   | 0.023            | 0.145  |
| 5378   | H2-DMb2   | -1.074 | 8.091   | -26.161 | 0.000   | 0.009            | 5.154  |
| 9005   | Pou2af1   | -1.078 | 8.488   | -6.791  | 0.001   | 0.029            | -0.606 |

Table S5

| ID    | Symbol    | logFC  | AveExpr | t       | P-value | Adjusted p-value | B      |
|-------|-----------|--------|---------|---------|---------|------------------|--------|
| 4618  | Fcrla     | -1.090 | 8.006   | -13.511 | 0.000   | 0.012            | 2.643  |
| 4977  | Gimap7    | -1.102 | 8.250   | -8.265  | 0.001   | 0.021            | 0.341  |
| 3403  | Cyp2c55   | -1.111 | 12.035  | -26.931 | 0.000   | 0.009            | 5.240  |
| 10420 | Serpina3g | -1.112 | 9.555   | -19.221 | 0.000   | 0.009            | 4.103  |
| 11462 | Tbc1d10c  | -1.129 | 9.486   | -9.287  | 0.000   | 0.019            | 0.901  |
| 2770  | Ces1d     | -1.129 | 9.768   | -10.504 | 0.000   | 0.016            | 1.487  |
| 2573  | Cd3d      | -1.154 | 9.003   | -7.201  | 0.001   | 0.027            | -0.324 |
| 6405  | Lck       | -1.161 | 8.706   | -11.367 | 0.000   | 0.015            | 1.857  |
| 2510  | Ccr6      | -1.166 | 8.360   | -24.890 | 0.000   | 0.009            | 5.001  |
| 6929  | Ly6g6c    | -1.184 | 8.854   | -12.592 | 0.000   | 0.013            | 2.327  |
| 5186  | Gpr18     | -1.220 | 8.271   | -13.025 | 0.000   | 0.012            | 2.480  |
| 3311  | Ctsw      | -1.246 | 8.585   | -6.385  | 0.002   | 0.032            | -0.901 |
| 10951 | Snn       | -1.265 | 8.590   | -15.735 | 0.000   | 0.011            | 3.302  |
| 2595  | Cd6       | -1.274 | 8.941   | -6.718  | 0.002   | 0.029            | -0.658 |
| 10524 | Sh2d2a    | -1.281 | 8.900   | -6.244  | 0.002   | 0.034            | -1.007 |
| 2574  | Cd3e      | -1.305 | 8.964   | -8.028  | 0.001   | 0.022            | 0.201  |
| 10294 | Sct       | -1.318 | 10.549  | -12.656 | 0.000   | 0.012            | 2.350  |
| 12727 | Vsig2     | -1.321 | 9.286   | -34.379 | 0.000   | 0.009            | 5.873  |
| 11320 | Sult1a1   | -1.332 | 10.027  | -18.146 | 0.000   | 0.009            | 3.881  |
| 1469  | Aqp8      | -1.353 | 11.155  | -12.183 | 0.000   | 0.013            | 2.177  |
| 995   | Actg2     | -1.358 | 8.521   | -8.180  | 0.001   | 0.022            | 0.291  |
| 10239 | Satb1     | -1.359 | 8.858   | -15.497 | 0.000   | 0.011            | 3.238  |
| 2576  | Cd3g      | -1.393 | 9.221   | -9.355  | 0.000   | 0.019            | 0.936  |
| 2344  | Car4      | -1.464 | 8.568   | -7.318  | 0.001   | 0.026            | -0.246 |
| 12805 | Wfdc2     | -1.501 | 9.084   | -9.402  | 0.000   | 0.019            | 0.960  |
| 2600  | Cd69      | -1.631 | 9.200   | -7.201  | 0.001   | 0.027            | -0.324 |
| 2614  | Cd8b1     | -1.782 | 9.038   | -6.026  | 0.002   | 0.037            | -1.177 |
| 9796  | Retnla    | -1.812 | 8.722   | -6.596  | 0.002   | 0.030            | -0.746 |
| 2482  | Ccl5      | -2.336 | 9.957   | -9.064  | 0.000   | 0.019            | 0.785  |
| 4474  | Faim3     | -2.500 | 8.623   | -13.540 | 0.000   | 0.012            | 2.653  |
