# Supplementary material for: Interplay of host microbiota, genetic perturbations, and inflammation promotes local development of intestinal neoplasms in mice
Source: PubMed Central journal article supplement — J Exp Med. 2014 Mar 10;211(3):457–72. doi: 10.1084/jem.20131587 (PMC3949565; doi:10.1084/jem.20131587), 2014-03-10
Supplement: supp_jem.20131587_JEM_20131587_TableS6.pdf [file supp_jem.20131587_JEM_20131587_TableS6.pdf]

**Table S6.** ClueGO analysis of the BeadArray analysis in CD45<sup>+</sup> cells isolated from *HBUS* polyps compared with unaffected proximal cecum

| GO term                                      | GO levels    | GO groups                         | Number of genes | % associated genes | Term p-value | Term p-value corrected with Benjamini and Hochberg |
|----------------------------------------------|--------------|-----------------------------------|-----------------|--------------------|--------------|----------------------------------------------------|
| cell activation                              | [3]          | [Group3]                          | 28              | 4.3209877          | 2.20325E-15  | 8.51924E-14                                        |
| regulation of immune system process          | [2, 3]       | [Group3]                          | 31              | 4.1059604          | 2.39633E-16  | 1.38987E-14                                        |
| positive regulation of immune system process | [2, 3, 4]    | [Group3]                          | 24              | 5.084746           | 7.41507E-15  | 1.7203E-13                                         |
| regulation of leukocyte activation           | [3, 4, 5]    | [Group2, Group3]                  | 18              | 5.4216866          | 6.73134E-12  | 1.11548E-10                                        |
| cellular protein modification process        | [5, 6]       | [Group3]                          | 27              | 1.2162162          | 0.001421906  | 0.002390451                                        |
| protein phosphorylation                      | [6, 7]       | [Group1, Group3]                  | 18              | 1.8218623          | 8.6142E-05   | 0.000212606                                        |
| phosphorus metabolic process                 | [3]          | [Group3]                          | 28              | 1.3182675          | 0.00032174   | 0.00064348                                         |
| apoptotic process                            | [5]          | [Group0, Group6]                  | 23              | 1.6511127          | 4.3055E-05   | 0.000128061                                        |
| response to stress                           | [2]          | [Group11]                         | 41              | 1.663286           | 1.84774E-08  | 1.19076E-07                                        |
| defense response                             | [3]          | [Group11]                         | 27              | 2.9063509          | 7.93643E-11  | 9.20626E-10                                        |
| inflammatory response                        | [4]          | [Group11]                         | 16              | 3.5874438          | 3.78664E-08  | 2.31184E-07                                        |
| immune response                              | [2]          | [Group3]                          | 39              | 4.785276           | 6.76247E-23  | 7.84447E-21                                        |
| cell communication                           | [3]          | [Group3]                          | 53              | 1.0849539          | 8.99437E-05  | 0.000217364                                        |
| cell adhesion                                | [2, 3]       | [None]                            | 19              | 2.183908           | 4.41252E-06  | 1.76501E-05                                        |
| signal transduction                          | [3, 4]       | [Group3]                          | 51              | 1.1713367          | 1.58363E-05  | 5.40296E-05                                        |
| cell surface receptor signaling pathway      | [4, 5]       | [Group3]                          | 33              | 1.16649            | 0.000841894  | 0.001525932                                        |
| multicellular organismal development         | [2, 3]       | [Group4]                          | 49              | 1.2515965          | 3.89755E-06  | 1.6745E-05                                         |
| cell death                                   | [3]          | [Group6]                          | 24              | 1.6161616          | 4.10982E-05  | 0.000125458                                        |
| cell proliferation                           | [2]          | [Group2]                          | 21              | 1.5261627          | 0.000277015  | 0.00056375                                         |
| response to wounding                         | [3]          | [Group11]                         | 22              | 2.9490616          | 3.92457E-09  | 3.035E-08                                          |
| response to bacterium                        | [3, 4]       | [Group11]                         | 18              | 4.245283           | 3.71002E-10  | 3.58635E-09                                        |
| tissue development                           | [3]          | [None]                            | 17              | 1.1378849          | 0.018956411  | 0.026816387                                        |
| regulation of signal transduction            | [3, 4, 5]    | [Group0, Group3, Group8]          | 26              | 1.4985591          | 6.93715E-05  | 0.000178824                                        |
| positive regulation of signal transduction   | [3, 4, 5, 6] | [Group0, Group10, Group3, Group6] | 15              | 1.7942584          | 0.000380566  | 0.000748232                                        |

Table S6

| GO term                                          | GO levels | GO groups                | Number of genes | % associated genes | Term p-value | Term p-value corrected with Benjamini and Hochberg |
|--------------------------------------------------|-----------|--------------------------|-----------------|--------------------|--------------|----------------------------------------------------|
| response to organic substance                    | [3]       | [Group10]                | 29              | 1.609323           | 6.51873E-06  | 2.43927E-05                                        |
| regulation of cell communication                 | [3, 4]    | [Group0, Group3, Group8] | 28              | 1.4155713          | 9.68949E-05  | 0.000220388                                        |
| regulation of cell death                         | [3, 4]    | [Group6]                 | 17              | 1.5260323          | 0.001029729  | 0.001782814                                        |
| regulation of phosphate metabolic process        | [5, 6]    | [Group3, Group8]         | 19              | 1.6964285          | 0.000141304  | 0.000298023                                        |
| regulation of metabolic process                  | [2, 3]    | [Group3]                 | 47              | 1.0322864          | 0.000889362  | 0.001587169                                        |
| protein metabolic process                        | [3, 4]    | [Group3]                 | 37              | 1                  | 0.006308821  | 0.009382349                                        |
| regulation of signaling                          | [2, 3]    | [Group0, Group3, Group8] | 28              | 1.4205986          | 9.11282E-05  | 0.000215732                                        |
| regulation of cellular metabolic process         | [3, 4]    | [Group3]                 | 41              | 0.9982956          | 0.004012414  | 0.006205867                                        |
| regulation of cellular protein metabolic process | [4, 5, 6] | [Group1, Group3]         | 16              | 1.4096916          | 0.00316694   | 0.005102292                                        |
| regulation of localization                       | [2, 3]    | [Group1, Group3]         | 19              | 1.3798112          | 0.001770293  | 0.00289231                                         |
| intracellular signal transduction                | [4, 5]    | [Group0, Group3]         | 27              | 1.489              | 0.000        | 0.000                                              |
| T cell activation                                | [4, 6]    | [Group3]                 | 21              | 6.442              | 0.000        | 0.000                                              |
| regulation of cell proliferation                 | [3, 4]    | [Group2, Group3]         | 17              | 1.540              | 0.001        | 0.002                                              |
| response to chemical stimulus                    | [2]       | [Group10]                | 41              | 1.197              | 0.000        | 0.000                                              |
| homeostatic process                              | [3]       | [Group7]                 | 17              | 1.324              | 0.005        | 0.007                                              |
| regulation of apoptotic process                  | [5, 6]    | [Group6]                 | 16              | 1.505              | 0.002        | 0.003                                              |
| positive regulation of molecular function        | [3]       | [Group8]                 | 17              | 1.974              | 0.000        | 0.000                                              |
| cellular metabolic process                       | [2]       | [Group3]                 | 66              | 0.837              | 0.016        | 0.023                                              |
| cellular catabolic process                       | [3]       | [None]                   | 15              | 1.125              | 0.028        | 0.039                                              |
| cellular protein metabolic process               | [4, 5]    | [Group3]                 | 30              | 1.024              | 0.010        | 0.015                                              |
| small molecule metabolic process                 | [3]       | [Group9]                 | 19              | 1.094              | 0.020        | 0.028                                              |

Table S6

| GO term                                     | GO levels    | GO groups        | Number of genes | % associated genes | Term p-value | Term p-value corrected with Benjamini and Hochberg |
|---------------------------------------------|--------------|------------------|-----------------|--------------------|--------------|----------------------------------------------------|
| single organism signaling                   | [2]          | [Group3]         | 53              | 1.111              | 0.000        | 0.000                                              |
| single-multicellular organism process       | [2]          | [Group4]         | 64              | 1.067              | 0.000        | 0.000                                              |
| single-organism cellular process            | [2]          | [Group3]         | 94              | 0.971              | 0.000        | 0.000                                              |
| single-organism transport                   | [2, 3, 4]    | [Group1]         | 27              | 1.149              | 0.003        | 0.005                                              |
| single-organism developmental process       | [2]          | [Group4, Group5] | 43              | 1.165              | 0.000        | 0.000                                              |
| lymphocyte activation                       | [3, 5]       | [Group3]         | 23              | 4.782              | 0.000        | 0.000                                              |
| organ development                           | [3, 4, 5]    | [Group4]         | 39              | 1.501              | 0.000        | 0.000                                              |
| positive regulation of biological process   | [1, 2, 3]    | [Group3]         | 51              | 1.514              | 0.000        | 0.000                                              |
| negative regulation of biological process   | [1, 2, 3]    | [Group3, Group5] | 39              | 1.278              | 0.000        | 0.000                                              |
| positive regulation of cellular process     | [2, 3, 4]    | [Group3]         | 43              | 1.431              | 0.000        | 0.000                                              |
| negative regulation of cellular process     | [2, 3, 4]    | [Group3, Group5] | 35              | 1.265              | 0.000        | 0.000                                              |
| hematopoietic or lymphoid organ development | [3, 4, 5, 6] | [Group3]         | 15              | 2.396              | 0.000        | 0.000                                              |
| regulation of response to stimulus          | [2, 3]       | [Group3]         | 41              | 1.854              | 0.000        | 0.000                                              |
| positive regulation of response to stimulus | [2, 3, 4]    | [Group0, Group3] | 27              | 2.379              | 0.000        | 0.000                                              |
| negative regulation of response to stimulus | [2, 3, 4]    | [Group3]         | 18              | 2.267              | 0.000        | 0.000                                              |
| system development                          | [3, 4]       | [Group4]         | 45              | 1.325              | 0.000        | 0.000                                              |
| anatomical structure development            | [2]          | [Group4]         | 51              | 1.287              | 0.000        | 0.000                                              |
| cellular developmental process              | [2, 3]       | [Group4]         | 38              | 1.277              | 0.000        | 0.000                                              |
| cell motility                               | [2, 3, 4]    | [None]           | 17              | 1.912              | 0.000        | 0.000                                              |
| regulation of immune response               | [3, 4]       | [Group3]         | 18              | 4.545              | 0.000        | 0.000                                              |
| positive regulation of immune response      | [3, 4, 5]    | [Group3]         | 16              | 5.517              | 0.000        | 0.000                                              |

Table S6

| GO term                                        | GO levels | GO groups         | Number of genes | % associated genes | Term p-value | Term p-value corrected with Benjamini and Hochberg |
|------------------------------------------------|-----------|-------------------|-----------------|--------------------|--------------|----------------------------------------------------|
| regulation of biological process               | [1, 2]    | [Group3]          | 84              | 0.987              | 0.000        | 0.000                                              |
| regulation of catalytic activity               | [3, 4]    | [Group3, Group8]  | 18              | 1.564              | 0.001        | 0.001                                              |
| regulation of developmental process            | [2, 3]    | [Group4, Group5]  | 23              | 1.492              | 0.000        | 0.000                                              |
| regulation of cellular process                 | [2, 3]    | [Group3]          | 76              | 0.945              | 0.000        | 0.000                                              |
| establishment of localization                  | [1, 2]    | [Group1]          | 32              | 1.060              | 0.005        | 0.007                                              |
| regulation of multicellular organismal process | [2, 3]    | [Group3, Group5]  | 32              | 1.642              | 0.000        | 0.000                                              |
| regulation of protein metabolic process        | [4, 5]    | [Group3]          | 20              | 1.484              | 0.001        | 0.001                                              |
| regulation of lymphocyte activation            | [4, 5, 6] | [Group3]          | 16              | 5.654              | 0.000        | 0.000                                              |
| response to other organism                     | [2, 3]    | [Group11]         | 21              | 3.344              | 0.000        | 0.000                                              |
| cellular response to stimulus                  | [2, 3]    | [Group3]          | 62              | 1.177              | 0.000        | 0.000                                              |
| regulation of macromolecule metabolic process  | [3, 4]    | [Group3]          | 36              | 0.907              | 0.030        | 0.041                                              |
| regulation of biological quality               | [2]       | [Group7]          | 28              | 1.212              | 0.001        | 0.002                                              |
| regulation of molecular function               | [2]       | [Group3, Group8]  | 22              | 1.429              | 0.000        | 0.001                                              |
| cellular response to chemical stimulus         | [3, 4]    | [Group10]         | 23              | 1.704              | 0.000        | 0.000                                              |
| regulation of primary metabolic process        | [3, 4]    | [Group3]          | 41              | 1.006              | 0.003        | 0.005                                              |
| regulation of response to stress               | [3, 4]    | [Group11]         | 15              | 2.304              | 0.000        | 0.000                                              |
| organonitrogen compound metabolic process      | [3]       | [Group9]          | 16              | 1.200              | 0.014        | 0.020                                              |
| response to oxygen-containing compound         | [3]       | [Group0, Group10] | 16              | 1.633              | 0.001        | 0.001                                              |

Table S6

| GO term                                            | GO levels | GO groups | Number of genes | % associated genes | Term p-value | Term p-value corrected with Benjamini and Hochberg |
|----------------------------------------------------|-----------|-----------|-----------------|--------------------|--------------|----------------------------------------------------|
| regulation of multicellular organismal development | [3, 4]    | [Group5]  | 21              | 1.724              | 0.000        | 0.000                                              |
